# Supplementary material for: JunB is a key regulator of multiple myeloma bone marrow angiogenesis
Source: PubMed Central journal article supplement (PMC8632680; doi:10.1038/s41375-021-01271-9), 2021-05-18
Supplement: 41375_2021_1271_MOESM2_ESM.pdf [file 41375_2021_1271_MOESM2_ESM.pdf]

| Chromosome | Peak Start | Peak End | Length (bp) | Abs Summit | -LOG10 (pvalue) | Fold Enrichment | -LOG10 (qvalue) | Gene Feature                                                     | Ensembl Gene ID          | Gene Start-Gene End | Strand            | Distance to TSS (bp) |       |
|------------|------------|----------|-------------|------------|-----------------|-----------------|-----------------|------------------------------------------------------------------|--------------------------|---------------------|-------------------|----------------------|-------|
| 1          | 2971037    | 2971400  | 364         | 2971180    | 4.1849          | 3.24157         | 0.52478         | intergenic                                                       | ENSG00000284745          | 2960657-2968707     | -                 | -2511                |       |
| 1          | 3289642    | 3289876  | 235         | 3289789    | 3.20396         | 2.64557         | 0.26167         | ENSG00000142611:intron                                           | ENSG00000272235          | 3306635-3310096     | -                 | 20337                |       |
| 1          | 3329841    | 3330049  | 209         | 3329988    | 6.35124         | 4.29576         | 1.83857         | ENSG00000142611:intron                                           | ENSG00000272235          | 3306635-3310096     | -                 | -19848               |       |
| 1          | 4359447    | 4359769  | 323         | 4359475    | 3.34993         | 2.92244         | 0.30123         | intergenic                                                       | ENSG00000235054          | 4412026-4424689     | +                 | -52418               |       |
| 1          | 5692316    | 5692594  | 279         | 5692560    | 4.56295         | 3.60388         | 0.59373         | intergenic                                                       | ENSG00000236948          | 5561708-5668295     | -                 | -24159               |       |
| 1          | 6784416    | 6784700  | 285         | 6784563    | 11.53275        | 5.55571         | 6.4016          | ENSG00000171735:Promoter                                         | ENSG00000237436          | 6783891-6784843     | -                 | 285                  |       |
| 1          | 7242454    | 7242662  | 209         | 7242619    | 5.39424         | 4.00432         | 1.09512         | :ENSG00000237436:intron                                          | ENSG00000207056          | 7219359-7219524     | +                 | 23198                |       |
| 1          | 12051997   | 12052314 | 318         | 12052162   | 10.64217        | 4.64231         | 5.60051         | ENSG00000171735:intron                                           | ENSG00000120949          | 12063376-12144207   | +                 | -11221               |       |
| 1          | 12161875   | 12162130 | 256         | 12162017   | 12.44681        | 6.03265         | 7.23865         | intergenic                                                       | ENSG00000283789          | 12166942-12167038   | +                 | -4940                |       |
| 1          | 12264651   | 12264857 | 207         | 12264657   | 3.64836         | 3.01523         | 0.30123         | intergenic                                                       | ENSG00000048707          | 12230029-12512047   | +                 | 34724                |       |
| 1          | 12303332   | 12303669 | 338         | 12303642   | 3.77589         | 3.20345         | 0.30123         | ENSG00000048707:intron                                           | ENSG00000048707          | 12230029-12512047   | +                 | 73471                |       |
| 1          | 13589779   | 13590158 | 380         | 13589880   | 3.56795         | 3.06614         | 0.30123         | ENSG00000162493:intron                                           | ENSG00000162493          | 13583464-13617957   | +                 | 6504                 |       |
| 1          | 14040070   | 14040339 | 270         | 14040193   | 10.33373        | 5.50729         | 5.31704         | ENSG00000189337:intron                                           | ENSG00000252151          | 14124232-14124335   | -                 | 84131                |       |
| 1          | 15126745   | 15126962 | 218         | 15126855   | 3.3168          | 2.90065         | 0.30123         | ENSG00000175147:intron                                           | ENSG00000171729          | 15152531-15220480   | +                 | -25678               |       |
| 1          | 15150562   | 15150772 | 211         | 15150643   | 3.46407         | 2.89822         | 0.30123         | ENSG00000175147:intron;E                                         | ENSG00000171729          | 15152531-15220480   | +                 | -1864                |       |
| 1          | 15571878   | 15572187 | 310         | 15572019   | 5.25679         | 3.77493         | 1.07467         | NSG00000171729:Promoter                                          | ENSG00000272510          | 15565610-15565956   | -                 | -6076                |       |
| 1          | 17397618   | 17397950 | 333         | 17397867   | 4.00982         | 3.24654         | 0.45978         | ENSG00000116138:intron                                           | ENSG00000227751          | 17406759-17407382   | +                 | -8975                |       |
| 1          | 20109449   | 20109800 | 352         | 20109636   | 6.26578         | 4.40475         | 1.75945         | ENSG00000276747:intron                                           | ENSG00000117215          | 20111938-20119566   | -                 | 9942                 |       |
| 1          | 21294648   | 21294881 | 234         | 21294711   | 5.84361         | 3.7038          | 1.44168         | intergenic                                                       | ENSG00000117298:intron;E | ENSG00000231105     | 21293289-21299774 | +                    | 1475  |
| 1          | 22025829   | 22026114 | 286         | 22025981   | 15.77144        | 6.65577         | 10.31754        | NSG00000231105:intron                                            | ENSG00000228397          | 22023989-22026048   | -                 | 77                   |       |
| 1          | 22822567   | 22822831 | 265         | 22822714   | 6.49439         | 4.38367         | 1.95029         | ENSG00000218510:intron;E                                         | ENSG00000228397          | 22023989-22026048   | -                 | 77                   |       |
| 1          | 23150847   | 23151175 | 329         | 23151087   | 3.94601         | 3.20555         | 0.42361         | NSG00000228397:exon;ENSG00000285721:intron;ENSG0000285950:intron | ENSG00000225952          | 22835712-22836849   | -                 | 14150                |       |
| 1          | 24541107   | 24541418 | 312         | 24541125   | 4.91514         | 3.56573         | 0.82412         | ENSG00000133216:intron                                           | ENSG00000229010          | 23140324-23141142   | +                 | 10686                |       |
| 1          | 25022891   | 25023159 | 269         | 25023007   | 7.56656         | 4.19944         | 2.85958         | ENSG00000169641:intron                                           | ENSG00000264443          | 24538801-24556024   | -                 | 14762                |       |
| 1          | 25883731   | 25883975 | 245         | 25883849   | 5.01585         | 3.49609         | 0.89533         | ENSG00000264443:intron                                           | ENSG00000264371          | 25023502-25023586   | +                 | -477                 |       |
| 1          | 27952486   | 27952709 | 224         | 27952512   | 4.02276         | 3.25486         | 0.46996         | ENSG00000264371:Promoter                                         | ENSG00000229786          | 25887359-25887610   | +                 | -3506                |       |
| 1          | 27973524   | 27973765 | 242         | 27973588   | 4.33895         | 3.45881         | 0.59373         | intergenic                                                       | ENSG00000130768:intron;E | ENSG00000158156     | 27959461-27968096 | +                    | -6864 |
| 1          | 28601680   | 28602024 | 345         | 28601856   | 4.64049         | 3.52611         | 0.64891         | NSG00000227050:intron                                            | ENSG00000158156          | 27959461-27968096   | +                 | 14183                |       |
| 1          | 29896723   | 29896942 | 220         | 29896837   | 4.88847         | 3.6826          | 0.81688         | ENSG00000158161:exon;ENS                                         | G00000158161:three_prime | 27959461-27968096   | +                 | 14183                |       |
| 1          | 30361776   | 30362011 | 236         | 30361988   | 4.03577         | 3.26323         | 0.47041         | IITR                                                             | intergenic               | ENSG00000188060     | 28592199-28595443 | +                    | 9652  |
| 1          | 36386512   | 36386761 | 250         | 36386615   | 12.08765        | 6.27606         | 6.91951         | intergenic                                                       | ENSG00000270927          | 29904864-29905357   | -                 | 8525                 |       |
| 1          | 37739190   | 37739541 | 352         | 37739428   | 9.78373         | 4.69287         | 4.83465         | intergenic                                                       | ENSG00000236335          | 30409559-30411638   | -                 | 49745                |       |
| 1          | 39394675   | 39394946 | 272         | 39394764   | 11.10484        | 6.16387         | 6.01942         | ENSG00000196182:Promoter                                         | ENSG00000196182          | 36339623-36385896   | -                 | -740                 |       |
| 1          | 44575013   | 44575288 | 276         | 44575185   | 3.29424         | 2.88581         | 0.30123         | ENSG00000200421:Promoter                                         | ENSG00000200421          | 37737954-37738054   | -                 | -1311                |       |
| 1          | 44713312   | 44713567 | 256         | 44713463   | 8.18881         | 4.69185         | 3.39457         | :ENSG00000183317:intron                                          | ENSG00000217897          | 39304293-39304898   | -                 | -89912               |       |
| 1          | 47211181   | 47211438 | 258         | 47211324   | 3.99693         | 3.23826         | 0.45978         | ENSG00000127603:intron                                           | ENSG00000217897          | 39304293-39304898   | -                 | -89912               |       |
| 1          | 48312813   | 48313177 | 365         | 48313044   | 3.77589         | 3.20345         | 0.30123         | ENSG00000187147:intron                                           | ENSG00000263381          | 44545492-44545552   | +                 | 29658                |       |
| 1          | 48967553   | 48967950 | 398         | 48967754   | 4.56295         | 3.60388         | 0.59373         | ENSG00000198520:intron                                           | ENSG00000199377          | 44721785-44721902   | -                 | 8463                 |       |
|            |            |          |             |            |                 |                 |                 | intergenic                                                       | ENSG00000226252          | 47225796-47230750   | +                 | -14487               |       |
|            |            |          |             |            |                 |                 |                 | ENSG00000132122:intron                                           | ENSG00000224986          | 48325079-48326123   | -                 | 13128                |       |
|            |            |          |             |            |                 |                 |                 | ENSG00000186094:intron                                           | ENSG00000229846          | 49025594-49187585   | +                 | -57843               |       |

|   |           |           |     |           |           |         |           |                                                      |                 |                     |   |          |
|---|-----------|-----------|-----|-----------|-----------|---------|-----------|------------------------------------------------------|-----------------|---------------------|---|----------|
| 1 | 49184249  | 49184550  | 302 | 49184433  | 4.56295   | 3.60388 | 0.59373   | ENSG00000186094:intron;E<br>NSG00000229846:intron    | ENSG00000230114 | 49257410-49269285   | + | -73011   |
| 1 | 49293043  | 49293333  | 291 | 49293127  | 3.77589   | 3.20345 | 0.30123   | ENSG00000186094:intron                               | ENSG00000230114 | 49257410-49269285   | + | 35777    |
| 1 | 49339114  | 49339332  | 219 | 49339236  | 6.09579   | 4.29768 | 1.6498    | ENSG00000186094:intron                               | ENSG00000230114 | 49257410-49269285   | + | 81812    |
| 1 | 49184249  | 49184550  | 302 | 49184433  | 4.56295   | 3.60388 | 0.59373   | ENSG00000186094:intron;E<br>NSG00000229846:intron    | ENSG00000230114 | 49257410-49269285   | + | -73011   |
| 1 | 49293043  | 49293333  | 291 | 49293127  | 3.77589   | 3.20345 | 0.30123   | ENSG00000186094:intron                               | ENSG00000230114 | 49257410-49269285   | + | 35777    |
| 1 | 49339114  | 49339332  | 219 | 49339236  | 6.09579   | 4.29768 | 1.6498    | ENSG00000186094:intron                               | ENSG00000230114 | 49257410-49269285   | + | 81812    |
| 1 | 49764924  | 49765159  | 236 | 49765017  | 4.62651   | 3.51732 | 0.63659   | ENSG00000186094:intron                               | ENSG00000237478 | 49691261-49691523   | - | -73518   |
| 1 | 50254961  | 50255430  | 470 | 50255272  | 4.56295   | 3.60388 | 0.59373   | ENSG00000284645:intron;E<br>NSG00000284696:intron    | ENSG00000284645 | 50252568-50258994   | + | 2627     |
| 1 | 53472272  | 53472542  | 271 | 53472363  | 4.86328   | 3.5342  | 0.79494   | intergenic                                           | ENSG00000143006 | 53459398-53467488   | + | 13008    |
| 1 | 56525593  | 56525975  | 383 | 56525654  | 5.58512   | 3.97816 | 1.25272   | ENSG00000162407:intron<br>ENSG00000234807:Promoter   | ENSG00000284686 | 56173432-56524495   | - | -1288    |
| 1 | 58784024  | 58784272  | 249 | 58784143  | 10.65162  | 5.29115 | 5.60305   | ;ENSG00000177606:five_prime_UTR;ENSG00000177606:exon | ENSG00000177606 | 58780787-58784327   | - | 179      |
| 1 | 59020216  | 59020589  | 374 | 59020391  | 14.11396  | 6.05711 | 8.77833   | ENSG00000237352:intron                               | ENSG00000228121 | 58999675-59000494   | + | 20727    |
| 1 | 59123968  | 59124225  | 258 | 59124195  | 4.16942   | 3.34931 | 0.52478   | intergenic                                           | ENSG00000235215 | 59055998-59078116   | - | -45980   |
| 1 | 60899141  | 60899467  | 327 | 60899312  | 10.09471  | 6.00647 | 5.09428   | ENSG00000162599:intron                               | ENSG00000231252 | 60659630-60867998   | - | -31305   |
| 1 | 61318803  | 61319129  | 327 | 61318968  | 12.20111  | 6.5755  | 7.01985   | ENSG00000162599:intron                               | ENSG00000237853 | 61248944-61253510   | - | -65455   |
| 1 | 62426992  | 62427437  | 446 | 62427105  | 3.49438   | 2.91742 | 0.30123   | intergenic                                           | ENSG00000162607 | 62436296-62451804   | + | -9082    |
| 1 | 62959254  | 62959630  | 377 | 62959556  | 7.17425   | 4.80518 | 2.52654   | intergenic                                           | ENSG00000237163 | 62905179-62905482   | + | 54262    |
| 1 | 65486736  | 65486988  | 253 | 65486848  | 4.56295   | 3.60388 | 0.59373   | ENSG00000116678:intron;E<br>NSG00000237852:intron    | ENSG00000237852 | 65486405-65494188   | + | 456      |
| 1 | 65812041  | 65812372  | 332 | 65812168  | 11.53275  | 5.55571 | 6.4016    | ENSG00000184588:intron                               | ENSG00000184588 | 65792513-66374579   | + | 19693    |
| 1 | 66013462  | 66013697  | 236 | 66013467  | 3.72445   | 3.16947 | 0.30123   | ENSG00000184588:intron                               | ENSG00000227466 | 66042499-66050718   | - | 37139    |
| 1 | 66119258  | 66119598  | 341 | 66119490  | 4.1849    | 3.24157 | 0.52478   | ENSG00000184588:intron                               | ENSG00000223152 | 66094460-66094546   | - | -24881   |
| 1 | 66860820  | 66861164  | 345 | 66861009  | 6.19166   | 4.35803 | 1.7362    | ENSG00000152763:intron                               | ENSG00000231080 | 66826941-66828558   | + | 34050    |
| 1 | 67013568  | 67013895  | 328 | 67013793  | 10.81138  | 6.21673 | 5.74678   | ENSG00000116704:intron                               | ENSG00000116704 | 66999331-67054099   | - | 40368    |
| 1 | 67037590  | 67037801  | 212 | 67037653  | 4.31475   | 3.20475 | 0.59373   | ENSG00000116704:intron                               | ENSG00000116704 | 66999331-67054099   | - | 16404    |
| 1 | 67339645  | 67339973  | 329 | 67339826  | 4.07388   | 3.28775 | 0.47041   | ENSG00000081985:intron                               | ENSG00000081985 | 67307363-67397090   | + | 32445    |
| 1 | 67495903  | 67496120  | 218 | 67496084  | 3.30549   | 2.89321 | 0.30123   | intergenic                                           | ENSG00000235200 | 67522346-67532612   | + | -26335   |
| 1 | 67610296  | 67610999  | 704 | 67610610  | 5.10865   | 3.82229 | 0.9653    | intergenic                                           | ENSG00000242482 | 67656830-67657129   | - | 46482    |
| 1 | 75249625  | 75249911  | 287 | 75249656  | 4.94982   | 3.72146 | 0.84841   | ENSG00000137968:intron                               | ENSG00000206999 | 75183044-75183147   | + | 66723    |
| 1 | 75265789  | 75266007  | 219 | 75265957  | 3.77589   | 3.20345 | 0.30123   | ENSG00000137968:intron                               | ENSG00000206999 | 75183044-75183147   | + | 82853    |
| 1 | 76270600  | 76270882  | 283 | 76270638  | 4.56295   | 3.60388 | 0.59373   | ENSG00000184005:intron                               | ENSG00000223905 | 76353582-76354246   | - | 83505    |
| 1 | 78383564  | 78384098  | 535 | 78383969  | 4.07388   | 3.28775 | 0.47041   | ENSG00000122420:intron                               | ENSG00000212308 | 78375163-78375268   | - | -8562    |
| 1 | 79892705  | 79892927  | 223 | 79892837  | 5.87556   | 4.15944 | 1.46959   | intergenic                                           | ENSG00000285409 | 79967732-80051404   | - | 158588   |
| 1 | 79926089  | 79926311  | 223 | 79926261  | 3.77589   | 3.20345 | 0.30123   | intergenic                                           | ENSG00000285409 | 79967732-80051404   | - | 125204   |
| 1 | 82346279  | 82346554  | 276 | 82346495  | 3.77589   | 3.20345 | 0.30123   | ENSG00000233290:intron                               | ENSG00000233290 | 82212412-82848205   | - | 501789   |
| 1 | 82799425  | 82799637  | 213 | 82799550  | 5.39424   | 4.00432 | 1.09512   | ENSG00000233290:intron                               | ENSG00000233290 | 82212412-82848205   | - | 48674    |
| 1 | 82831029  | 82831267  | 239 | 82831238  | 4.56295   | 3.60388 | 0.59373   | ENSG00000233290:intron                               | ENSG00000233290 | 82212412-82848205   | - | 17057    |
| 1 | 85977685  | 85978048  | 364 | 85977797  | 5.6497    | 4.01836 | 1.29426   | ENSG00000171502:intron                               | ENSG00000229505 | 86029853-86030589   | + | -51987   |
| 1 | 86560966  | 86561320  | 355 | 86561111  | 6.02088   | 4.25059 | 1.59152   | ENSG00000016602:intron                               | ENSG00000224466 | 86552624-86553342   | - | -7800    |
| 1 | 87312515  | 87312737  | 223 | 87312533  | 4.29558   | 3.43077 | 0.59373   | intergenic                                           | ENSG00000143013 | 87328467-87348923   | + | -15841   |
| 1 | 89054614  | 89054861  | 248 | 89054717  | 5.50408   | 3.92781 | 1.18712   | ENSG00000117228:exon                                 | ENSG00000117228 | 89052318-89065360   | - | 10623    |
| 1 | 90088954  | 90089171  | 218 | 90089136  | 4.919     | 3.70193 | 0.82412   | intergenic                                           | ENSG00000162664 | 89995111-90035531   | + | 93951    |
| 1 | 90490782  | 90491102  | 321 | 90490958  | 3.61899   | 3.09983 | 0.30123   | intergenic                                           | ENSG00000229201 | 90510909-90533472   | - | 42530    |
| 1 | 107936516 | 107936770 | 255 | 107936623 | 8.1168    | 5.20561 | 3.35333   | ENSG00000134215:intron                               | ENSG00000230489 | 107964442-107994607 | + | -27799   |
| 1 | 125180102 | 125180310 | 209 | 125180205 | 416.09158 | 2.03467 | 406.90308 | intergenic                                           | ENSG00000224857 | 121573945-121580524 | - | -3599681 |

|   |           |           |     |           |           |         |           |                          |                 |                     |   |          |
|---|-----------|-----------|-----|-----------|-----------|---------|-----------|--------------------------|-----------------|---------------------|---|----------|
| 1 | 125183667 | 125183883 | 217 | 125183785 | 25.70222  | 1.96749 | 19.87808  | intergenic               | ENSG00000224857 | 121573945-121580524 | - | -3603250 |
| 1 | 125180102 | 125180310 | 209 | 125180205 | 416.09158 | 2.03467 | 406.90308 | intergenic               | ENSG00000224857 | 121573945-121580524 | - | -3599681 |
| 1 | 125183667 | 125183883 | 217 | 125183785 | 25.70222  | 1.96749 | 19.87808  | intergenic               | ENSG00000224857 | 121573945-121580524 | - | -3603250 |
| 1 | 125180102 | 125180310 | 209 | 125180205 | 416.09158 | 2.03467 | 406.90308 | intergenic               | ENSG00000224857 | 121573945-121580524 | - | -3599681 |
| 1 | 125183667 | 125183883 | 217 | 125183785 | 25.70222  | 1.96749 | 19.87808  | intergenic               | ENSG00000224857 | 121573945-121580524 | - | -3603250 |
| 1 | 125180102 | 125180310 | 209 | 125180205 | 416.09158 | 2.03467 | 406.90308 | intergenic               | ENSG00000224857 | 121573945-121580524 | - | -3599681 |
| 1 | 125183667 | 125183883 | 217 | 125183785 | 25.70222  | 1.96749 | 19.87808  | intergenic               | ENSG00000224857 | 121573945-121580524 | - | -3603250 |
| 1 | 146793758 | 146793984 | 227 | 146793808 | 3.77589   | 3.20345 | 0.30123   | ENSG00000276975:intron   | ENSG00000274450 | 146862728-146862845 | - | 68974    |
| 1 | 147438254 | 147438477 | 224 | 147438394 | 4.2966    | 3.31094 | 0.59373   | ENSG00000278811:intron   | ENSG00000272443 | 147445578-147446133 | + | -7213    |
| 1 | 147549539 | 147549797 | 259 | 147549690 | 10.40398  | 5.34918 | 5.38351   | ENSG00000116128:intron   | ENSG00000116128 | 147541411-147626216 | + | 8256     |
|   |           |           |     |           |           |         |           | ENSG00000264522:three_pr |                 |                     |   |          |
| 1 | 149939122 | 149939521 | 400 | 149939281 | 6.8151    | 3.95242 | 2.22092   | ime_UTR;ENSG00000264522: | ENSG00000014914 | 149928650-149936869 | - | -2452    |
|   |           |           |     |           |           |         |           | exon                     |                 |                     |   |          |
| 1 | 150584894 | 150585223 | 330 | 150585186 | 4.11506   | 3.19834 | 0.49781   | intergenic               | ENSG00000143384 | 150574550-150579738 | - | -5320    |
| 1 | 150613305 | 150613779 | 475 | 150613719 | 4.93372   | 3.32789 | 0.83448   | ENSG00000143420:intron   | ENSG00000276103 | 150608506-150608623 | - | -4918    |
| 1 | 152048143 | 152048417 | 275 | 152048259 | 7.57779   | 3.50621 | 2.86844   | ENSG00000163191:Promoter | ENSG00000163191 | 152032505-152047907 | - | -372     |
| 1 | 152438152 | 152438410 | 259 | 152438185 | 4.83688   | 3.51817 | 0.77787   | intergenic               | ENSG00000143536 | 152409242-152414263 | - | -24017   |
| 1 | 152438152 | 152438410 | 259 | 152438185 | 4.83688   | 3.51817 | 0.77787   | intergenic               | ENSG00000143536 | 152409242-152414263 | - | -24017   |
| 1 | 155301129 | 155301375 | 247 | 155301198 | 5.75051   | 3.78743 | 1.36222   | ENSG00000143627:intron   | ENSG00000143627 | 155289292-155301438 | - | 186      |
| 1 | 157620322 | 157620597 | 276 | 157620488 | 3.76336   | 3.08858 | 0.30123   | intergenic               | ENSG00000236731 | 157629938-157630728 | - | 10269    |
| 1 | 157626031 | 157626526 | 496 | 157626233 | 6.43548   | 4.18632 | 1.91127   | intergenic               | ENSG00000236731 | 157629938-157630728 | - | 4450     |
| 1 | 157842889 | 157843164 | 276 | 157843038 | 7.52827   | 4.49198 | 2.82287   | ENSG00000073754:intron   | ENSG00000227425 | 157861196-157861460 | + | -18170   |
| 1 | 158248070 | 158248404 | 335 | 158248209 | 6.4824    | 4.21404 | 1.94623   | intergenic               | ENSG00000158477 | 158254136-158258269 | + | -5899    |
| 1 | 158621887 | 158622132 | 246 | 158622073 | 3.78699   | 3.10368 | 0.30881   | ENSG00000163554:intron   | ENSG00000198967 | 158605267-158612514 | + | 16742    |
| 1 | 158819698 | 158819939 | 242 | 158819827 | 8.96392   | 5.12897 | 4.09818   | intergenic               | ENSG00000180409 | 158808398-158809335 | - | -10483   |
| 1 | 158847133 | 158847706 | 574 | 158847567 | 3.49438   | 2.91742 | 0.30123   | ENSG00000163563:intron   | ENSG00000163563 | 158831316-158849506 | + | 16103    |
| 1 | 158910132 | 158910353 | 222 | 158910300 | 5.68188   | 3.88989 | 1.31322   | intergenic               | ENSG00000163564 | 158930795-158977054 | + | -20553   |
| 1 | 158952699 | 158953045 | 347 | 158952887 | 6.4824    | 4.21404 | 1.94623   | ENSG00000163564:intron   | ENSG00000163564 | 158930795-158977054 | + | 22076    |
| 1 | 159015605 | 159015822 | 218 | 159015671 | 5.95396   | 3.63426 | 1.53177   | ENSG00000163565:intron   | ENSG00000163565 | 158999967-159055155 | + | 15746    |
| 1 | 159031248 | 159031632 | 385 | 159031454 | 4.78394   | 3.61651 | 0.75881   | ENSG00000163565:intron   | ENSG00000163565 | 158999967-159055155 | + | 31472    |
| 1 | 159015605 | 159015822 | 218 | 159015671 | 5.95396   | 3.63426 | 1.53177   | ENSG00000163565:intron   | ENSG00000163565 | 158999967-159055155 | + | 15746    |
| 1 | 159031248 | 159031632 | 385 | 159031454 | 4.78394   | 3.61651 | 0.75881   | ENSG00000163565:intron   | ENSG00000163565 | 158999967-159055155 | + | 31472    |
| 1 | 159068171 | 159068572 | 402 | 159068425 | 7.46137   | 4.62446 | 2.76343   | ENSG00000163568:intron   | ENSG00000233473 | 159081132-159081795 | - | 13424    |
| 1 | 159089080 | 159089362 | 283 | 159089361 | 3.49438   | 2.91742 | 0.30123   | ENSG00000163568:intron   | ENSG00000233473 | 159081132-159081795 | - | -7425    |
| 1 | 159068171 | 159068572 | 402 | 159068425 | 7.46137   | 4.62446 | 2.76343   | ENSG00000163568:intron   | ENSG00000233473 | 159081132-159081795 | - | 13424    |
| 1 | 159089080 | 159089362 | 283 | 159089361 | 3.49438   | 2.91742 | 0.30123   | ENSG00000163568:intron   | ENSG00000233473 | 159081132-159081795 | - | -7425    |
| 1 | 159142155 | 159142449 | 295 | 159142156 | 3.20396   | 2.64557 | 0.26167   | ENSG00000163568:intron   | ENSG00000163568 | 159062483-159147096 | - | 4794     |
| 1 | 159360936 | 159361187 | 252 | 159360986 | 3.53832   | 2.94528 | 0.30123   | ENSG00000228560:intron   | ENSG00000251686 | 159366160-159367089 | + | -5099    |
| 1 | 159720489 | 159720692 | 204 | 159720587 | 5.77031   | 4.0936  | 1.37979   | intergenic               | ENSG00000132693 | 159712288-159714589 | - | -6001    |
| 1 | 159728083 | 159728438 | 356 | 159728159 | 3.90845   | 3.18146 | 0.39391   | intergenic               | ENSG00000132693 | 159712288-159714589 | - | -13671   |
| 1 | 159890021 | 159890234 | 214 | 159890129 | 5.17085   | 3.34134 | 1.01289   | ENSG00000213085:intron   | ENSG00000266458 | 159899978-159900079 | - | 9952     |
| 1 | 162109919 | 162110314 | 396 | 162109983 | 5.99467   | 4.07842 | 1.56946   | ENSG00000198929:intron   | ENSG00000198929 | 162069773-162370475 | + | 40343    |
| 1 | 163852214 | 163852461 | 248 | 163852293 | 4.76929   | 3.60726 | 0.74587   | intergenic               | ENSG00000212538 | 163923669-163923873 | + | -71332   |
| 1 | 163917089 | 163917338 | 250 | 163917095 | 3.23881   | 2.84938 | 0.2852    | intergenic               | ENSG00000212538 | 163923669-163923873 | + | -6456    |
| 1 | 164105399 | 164105633 | 235 | 164105422 | 5.07624   | 3.80169 | 0.93914   | intergenic               | ENSG00000212538 | 163923669-163923873 | + | 181846   |
| 1 | 163852214 | 163852461 | 248 | 163852293 | 4.76929   | 3.60726 | 0.74587   | intergenic               | ENSG00000212538 | 163923669-163923873 | + | -71332   |
| 1 | 163917089 | 163917338 | 250 | 163917095 | 3.23881   | 2.84938 | 0.2852    | intergenic               | ENSG00000212538 | 163923669-163923873 | + | -6456    |
| 1 | 164105399 | 164105633 | 235 | 164105422 | 5.07624   | 3.80169 | 0.93914   | intergenic               | ENSG00000212538 | 163923669-163923873 | + | 181846   |
| 1 | 164817968 | 164818248 | 281 | 164818239 | 4.55755   | 3.47401 | 0.59373   | ENSG00000185630:intron   | ENSG00000271917 | 164828435-164829952 | + | -10327   |
| 1 | 165365685 | 165365954 | 270 | 165365795 | 4.82831   | 3.64454 | 0.77787   | intergenic               | ENSG00000162761 | 165201866-165356715 | - | -9104    |
| 1 | 165727071 | 165727315 | 245 | 165727239 | 3.32816   | 2.90812 | 0.30123   | intergenic               | ENSG00000273365 | 165706555-165707284 | - | -19908   |

|   |           |           |     |           |         |         |         |  |                                                      |                 |                     |   |         |  |
|---|-----------|-----------|-----|-----------|---------|---------|---------|--|------------------------------------------------------|-----------------|---------------------|---|---------|--|
|   |           |           |     |           |         |         |         |  | ENSG00000143179:Promoter                             |                 |                     |   |         |  |
| 1 | 165827530 | 165827836 | 307 | 165827749 | 3.20594 | 2.48841 | 0.26185 |  | ;ENSG00000143183:five_prime_UTR;ENSG00000143183:exon | ENSG00000143183 | 165724292-165827755 | - | 72      |  |
| 1 | 168144632 | 168144902 | 271 | 168144747 | 3.45699 | 2.99296 | 0.30123 |  | intergenic                                           | ENSG00000143147 | 168079542-168137667 | - | -7099   |  |
| 1 | 172254973 | 172255215 | 243 | 172255038 | 5.13473 | 3.43925 | 0.98202 |  | ENSG00000197959:intron                               | ENSG00000230630 | 172138396-172144840 | - | -110253 |  |
| 1 | 173283421 | 173283648 | 228 | 173283636 | 4.1849  | 3.24157 | 0.52478 |  | intergenic                                           | ENSG00000232751 | 173351688-173352004 | + | -68154  |  |
| 1 | 174057638 | 174057891 | 254 | 174057812 | 3.32816 | 2.90812 | 0.30123 |  | intergenic                                           | ENSG00000225713 | 174090135-174090474 | - | 32710   |  |
| 1 | 174841967 | 174842209 | 243 | 174842009 | 6.38722 | 4.15784 | 1.8702  |  | ENSG00000152061:intron                               | ENSG00000231378 | 174849666-174850168 | - | 8080    |  |
| 1 | 175263610 | 175263841 | 232 | 175263750 | 3.6499  | 2.91341 | 0.30123 |  | intergenic                                           | ENSG00000233946 | 175297079-175297240 | + | -33354  |  |
| 1 | 176067253 | 176067477 | 225 | 176067385 | 5.56876 | 3.96799 | 1.238   |  | ENSG00000143207:intron                               | ENSG00000228686 | 176017276-176018760 | + | 50088   |  |
| 1 | 177582118 | 177582339 | 222 | 177582192 | 7.79913 | 5.0097  | 3.0731  |  | ENSG00000227579:intron                               | ENSG00000227579 | 177393286-177597709 | - | 15481   |  |
| 1 | 177686314 | 177686557 | 244 | 177686492 | 4.29558 | 3.43077 | 0.59373 |  | intergenic                                           | ENSG00000236720 | 177700523-177710330 | + | -14088  |  |
| 1 | 177700413 | 177700693 | 281 | 177700648 | 4.1849  | 3.24157 | 0.52478 |  | ENSG00000236720:exon                                 | ENSG00000236720 | 177700523-177710330 | + | 29      |  |
| 1 | 177800612 | 177800958 | 347 | 177800761 | 3.14236 | 2.78607 | 0.22463 |  | intergenic                                           | ENSG00000236720 | 177700523-177710330 | + | 100261  |  |
| 1 | 177686314 | 177686557 | 244 | 177686492 | 4.29558 | 3.43077 | 0.59373 |  | intergenic                                           | ENSG00000236720 | 177700523-177710330 | + | -14088  |  |
| 1 | 177700413 | 177700693 | 281 | 177700648 | 4.1849  | 3.24157 | 0.52478 |  | ENSG00000236720:exon                                 | ENSG00000236720 | 177700523-177710330 | + | 29      |  |
| 1 | 177800612 | 177800958 | 347 | 177800761 | 3.14236 | 2.78607 | 0.22463 |  | intergenic                                           | ENSG00000236720 | 177700523-177710330 | + | 100261  |  |
| 1 | 179678527 | 179678811 | 285 | 179678660 | 4.00982 | 3.24654 | 0.45978 |  | ENSG00000162782:intron                               | ENSG00000243062 | 179730216-179742697 | + | -51547  |  |
| 1 | 179899322 | 179899640 | 319 | 179899579 | 3.4812  | 3.00892 | 0.30123 |  | ENSG00000143337:intron;ENSG00000264916:Promoter      | ENSG00000264916 | 179900261-179900564 | + | -780    |  |
| 1 | 183956696 | 183957010 | 315 | 183956851 | 8.06337 | 4.79751 | 3.31375 |  | ENSG00000198756:intron                               | ENSG00000198756 | 183929853-184037729 | - | 80876   |  |
| 1 | 183959987 | 183960229 | 243 | 183960058 | 5.04416 | 3.78131 | 0.91864 |  | ENSG00000198756:intron                               | ENSG00000198756 | 183929853-184037729 | - | 77621   |  |
| 1 | 183992969 | 183993229 | 261 | 183993189 | 5.40925 | 3.86905 | 1.10135 |  | ENSG00000198756:intron                               | ENSG00000198756 | 183929853-184037729 | - | 44630   |  |
| 1 | 183956696 | 183957010 | 315 | 183956851 | 8.06337 | 4.79751 | 3.31375 |  | ENSG00000198756:intron                               | ENSG00000198756 | 183929853-184037729 | - | 80876   |  |
| 1 | 183959987 | 183960229 | 243 | 183960058 | 5.04416 | 3.78131 | 0.91864 |  | ENSG00000198756:intron                               | ENSG00000198756 | 183929853-184037729 | - | 77621   |  |
| 1 | 183992969 | 183993229 | 261 | 183993189 | 5.40925 | 3.86905 | 1.10135 |  | ENSG00000198756:intron                               | ENSG00000198756 | 183929853-184037729 | - | 44630   |  |
| 1 | 184331002 | 184331225 | 224 | 184331123 | 3.95865 | 3.21367 | 0.43404 |  | ENSG00000231791:intron                               | ENSG00000231791 | 184329070-184332826 | + | 2043    |  |
| 1 | 184844019 | 184844277 | 259 | 184844129 | 4.84177 | 3.65305 | 0.77787 |  | ENSG00000135842:intron                               | ENSG00000252222 | 184821427-184821489 | - | -22658  |  |
| 1 | 184994172 | 184994438 | 267 | 184994256 | 3.49438 | 2.91742 | 0.30123 |  | intergenic                                           | ENSG00000260976 | 185001526-185008683 | + | -7221   |  |
| 1 | 185306117 | 185306478 | 362 | 185306288 | 3.97135 | 3.22182 | 0.44441 |  | ENSG00000116679:intron                               | ENSG00000116679 | 185296387-185317329 | - | 11032   |  |
| 1 | 185614177 | 185614446 | 270 | 185614285 | 6.17229 | 4.34582 | 1.71923 |  | ENSG00000228309:intron                               | ENSG00000228309 | 185558371-185628527 | - | 14216   |  |
| 1 | 185617800 | 185618011 | 212 | 185617845 | 5.39424 | 4.00432 | 1.09512 |  | ENSG00000228309:intron                               | ENSG00000228309 | 185558371-185628527 | - | 10622   |  |
| 1 | 186434641 | 186434856 | 216 | 186434659 | 4.07388 | 3.28775 | 0.47041 |  | ENSG00000229739:Promoter                             | ENSG00000229739 | 186435160-186470291 | + | -412    |  |
| 1 | 187015864 | 187016075 | 212 | 187015895 | 4.32442 | 3.44941 | 0.59373 |  | intergenic                                           | ENSG00000230426 | 187070699-187686622 | + | -54730  |  |
| 1 | 187042323 | 187042623 | 301 | 187042406 | 6.74377 | 4.53757 | 2.15867 |  | intergenic                                           | ENSG00000230426 | 187070699-187686622 | + | -28226  |  |
| 1 | 187172468 | 187172752 | 285 | 187172638 | 5.39424 | 4.00432 | 1.09512 |  | ENSG00000230426:intron                               | ENSG00000230426 | 187070699-187686622 | + | 101910  |  |
| 1 | 187185461 | 187185753 | 293 | 187185576 | 8.53333 | 5.2656  | 3.7098  |  | ENSG00000230426:intron                               | ENSG00000230426 | 187070699-187686622 | + | 114907  |  |
| 1 | 187197278 | 187197770 | 493 | 187197389 | 4.1849  | 3.24157 | 0.52478 |  | ENSG00000230426:intron                               | ENSG00000230426 | 187070699-187686622 | + | 126824  |  |
| 1 | 187279428 | 187279697 | 270 | 187279496 | 3.34993 | 2.92244 | 0.30123 |  | ENSG00000230426:intron                               | ENSG00000230426 | 187070699-187686622 | + | 208863  |  |
| 1 | 187015864 | 187016075 | 212 | 187015895 | 4.32442 | 3.44941 | 0.59373 |  | intergenic                                           | ENSG00000230426 | 187070699-187686622 | + | -54730  |  |
| 1 | 187042323 | 187042623 | 301 | 187042406 | 6.74377 | 4.53757 | 2.15867 |  | intergenic                                           | ENSG00000230426 | 187070699-187686622 | + | -28226  |  |
| 1 | 187172468 | 187172752 | 285 | 187172638 | 5.39424 | 4.00432 | 1.09512 |  | ENSG00000230426:intron                               | ENSG00000230426 | 187070699-187686622 | + | 101910  |  |
| 1 | 187185461 | 187185753 | 293 | 187185576 | 8.53333 | 5.2656  | 3.7098  |  | ENSG00000230426:intron                               | ENSG00000230426 | 187070699-187686622 | + | 114907  |  |
| 1 | 187197278 | 187197770 | 493 | 187197389 | 4.1849  | 3.24157 | 0.52478 |  | ENSG00000230426:intron                               | ENSG00000230426 | 187070699-187686622 | + | 126824  |  |
| 1 | 187279428 | 187279697 | 270 | 187279496 | 3.34993 | 2.92244 | 0.30123 |  | ENSG00000230426:intron                               | ENSG00000230426 | 187070699-187686622 | + | 208863  |  |
| 1 | 187015864 | 187016075 | 212 | 187015895 | 4.32442 | 3.44941 | 0.59373 |  | intergenic                                           | ENSG00000230426 | 187070699-187686622 | + | -54730  |  |
| 1 | 187042323 | 187042623 | 301 | 187042406 | 6.74377 | 4.53757 | 2.15867 |  | intergenic                                           | ENSG00000230426 | 187070699-187686622 | + | -28226  |  |
| 1 | 187172468 | 187172752 | 285 | 187172638 | 5.39424 | 4.00432 | 1.09512 |  | ENSG00000230426:intron                               | ENSG00000230426 | 187070699-187686622 | + | 101910  |  |
| 1 | 187185461 | 187185753 | 293 | 187185576 | 8.53333 | 5.2656  | 3.7098  |  | ENSG00000230426:intron                               | ENSG00000230426 | 187070699-187686622 | + | 114907  |  |
| 1 | 187197278 | 187197770 | 493 | 187197389 | 4.1849  | 3.24157 | 0.52478 |  | ENSG00000230426:intron                               | ENSG00000230426 | 187070699-187686622 | + | 126824  |  |

|   |           |           |     |           |          |         |          |                                                     |                 |                     |   |         |
|---|-----------|-----------|-----|-----------|----------|---------|----------|-----------------------------------------------------|-----------------|---------------------|---|---------|
| 1 | 187279428 | 187279697 | 270 | 187279496 | 3.34993  | 2.92244 | 0.30123  | ENSG00000230426:intron                              | ENSG00000230426 | 187070699-187686622 | + | 208863  |
| 1 | 188610998 | 188611217 | 220 | 188611069 | 4.56295  | 3.60388 | 0.59373  | intergenic                                          | ENSG00000235083 | 188671352-188671759 | + | -60245  |
| 1 | 189316939 | 189317246 | 308 | 189317119 | 4.07388  | 3.28775 | 0.47041  | intergenic                                          | ENSG00000226196 | 189132349-189133292 | - | -183800 |
| 1 | 192092218 | 192092442 | 225 | 192092371 | 4.91514  | 3.56573 | 0.82412  | intergenic                                          | ENSG00000150681 | 192158456-192185815 | + | -66126  |
| 1 | 192952071 | 192952331 | 261 | 192952261 | 4.31475  | 3.20475 | 0.59373  | intergenic                                          | ENSG00000285280 | 192167785-192957713 | - | 5512    |
| 1 | 193171469 | 193171685 | 217 | 193171499 | 4.33895  | 3.45881 | 0.59373  | ENSG00000134371:intron                              | ENSG00000162630 | 193179044-193186654 | - | 15077   |
| 1 | 193595586 | 193595805 | 220 | 193595609 | 4.35356  | 3.46825 | 0.59373  | intergenic                                          | ENSG00000226640 | 193678893-193727035 | + | -83198  |
| 1 | 193609000 | 193609307 | 308 | 193609134 | 5.38044  | 3.99551 | 1.09512  | intergenic                                          | ENSG00000226640 | 193678893-193727035 | + | -69740  |
| 1 | 193658230 | 193658453 | 224 | 193658422 | 4.87332  | 3.67301 | 0.80353  | intergenic                                          | ENSG00000226640 | 193678893-193727035 | + | -20552  |
| 1 | 193595586 | 193595805 | 220 | 193595609 | 4.35356  | 3.46825 | 0.59373  | intergenic                                          | ENSG00000226640 | 193678893-193727035 | + | -83198  |
| 1 | 193609000 | 193609307 | 308 | 193609134 | 5.38044  | 3.99551 | 1.09512  | intergenic                                          | ENSG00000226640 | 193678893-193727035 | + | -69740  |
| 1 | 193658230 | 193658453 | 224 | 193658422 | 4.87332  | 3.67301 | 0.80353  | intergenic                                          | ENSG00000226640 | 193678893-193727035 | + | -20552  |
| 1 | 194919149 | 194919462 | 314 | 194919239 | 6.26578  | 4.40475 | 1.75945  | ENSG00000285718:intron                              | ENSG00000285718 | 194785516-194931310 | - | 12005   |
| 1 | 199381840 | 199382176 | 337 | 199382049 | 7.37304  | 4.74897 | 2.68538  | ENSG00000231718:intron                              | ENSG00000236468 | 199387140-199388475 | + | -5132   |
| 1 | 199546029 | 199546246 | 218 | 199546144 | 6.26578  | 4.40475 | 1.75945  | intergenic                                          | ENSG00000236468 | 199387140-199388475 | + | 158997  |
| 1 | 200866569 | 200866922 | 354 | 200866693 | 30.54666 | 9.93365 | 24.60392 | intergenic                                          | ENSG00000231333 | 200863807-200864152 | + | 2938    |
| 1 | 201842827 | 201843120 | 294 | 201843087 | 3.6499   | 2.91341 | 0.30123  | ENSG00000198700:intron                              | ENSG00000231871 | 201688258-201829559 | - | -13414  |
| 1 | 202909759 | 202910063 | 305 | 202909947 | 4.35972  | 3.35026 | 0.59373  | ENSG00000117153:intron;E<br>NSG00000230280:Promoter | ENSG00000230280 | 202911811-202912729 | + | -1900   |
| 1 | 203381488 | 203381731 | 244 | 203381563 | 5.93384  | 3.89305 | 1.51725  | intergenic                                          | ENSG00000271588 | 203400265-203400581 | - | 18972   |
| 1 | 203607367 | 203607609 | 243 | 203607569 | 4.76422  | 3.12858 | 0.74587  | intergenic                                          | ENSG00000058668 | 203626560-203744081 | + | -19072  |
| 1 | 203946015 | 203946276 | 262 | 203946212 | 6.04362  | 4.10812 | 1.61132  | intergenic                                          | ENSG00000237379 | 203954639-203955780 | + | -8494   |
| 1 | 205584844 | 205585084 | 241 | 205585040 | 3.90052  | 3.06626 | 0.38783  | ENSG00000174514:intron                              | ENSG00000206762 | 205595040-205595147 | + | -10076  |
| 1 | 206050722 | 206051105 | 384 | 206050852 | 14.68026 | 5.94142 | 9.2998   | ENSG00000263961:Promoter<br>:ENSG00000285417:intron | ENSG00000263961 | 206052722-206102459 | + | -1809   |
| 1 | 206784438 | 206784729 | 292 | 206784599 | 19.16017 | 7.883   | 13.561   | intergenic                                          | ENSG00000136634 | 206767601-206772494 | - | -12089  |
| 1 | 207260994 | 207261262 | 269 | 207261188 | 4.04884  | 3.27164 | 0.47041  | ENSG00000237074:intron                              | ENSG00000237074 | 207240121-207309292 | + | 21006   |
| 1 | 207269243 | 207269556 | 314 | 207269350 | 3.88371  | 3.16559 | 0.37576  | ENSG00000237074:intron                              | ENSG00000237074 | 207240121-207309292 | + | 29278   |
| 1 | 207300868 | 207301107 | 240 | 207300992 | 6.06008  | 4.11811 | 1.6243   | ENSG00000237074:intron                              | ENSG00000196352 | 207321375-207386804 | + | -20388  |
| 1 | 207469515 | 207469767 | 253 | 207469604 | 4.06198  | 3.28009 | 0.47041  | ENSG00000117322:intron                              | ENSG00000117322 | 207454229-207489895 | + | 15411   |
| 1 | 207603017 | 207603244 | 228 | 207603198 | 4.11506  | 3.19834 | 0.49781  | ENSG00000203710:intron;E<br>NSG00000236911:intron   | ENSG00000236911 | 207551924-207606555 | - | 3425    |
| 1 | 207659711 | 207659941 | 231 | 207659767 | 4.35972  | 3.35026 | 0.59373  | ENSG00000197721:intron                              | ENSG00000226289 | 207658453-207659142 | + | 1372    |
| 1 | 209312099 | 209312329 | 231 | 209312110 | 3.53038  | 3.04135 | 0.30123  | intergenic                                          | ENSG00000227940 | 209325455-209328532 | + | -13241  |
| 1 | 209673372 | 209673648 | 277 | 209673457 | 7.40928  | 4.11883 | 2.71399  | ENSG00000227591:intron;E<br>NSG00000123689:Promoter | ENSG00000123689 | 209675419-209676388 | + | -1909   |
| 1 | 209747762 | 209748058 | 297 | 209747890 | 13.05915 | 5.39155 | 7.81101  | intergenic                                          | ENSG00000236136 | 209744372-209745214 | + | 3537    |
| 1 | 211939906 | 211940179 | 274 | 211940092 | 8.98232  | 4.95279 | 4.10924  | intergenic                                          | ENSG00000233626 | 211936248-211936634 | + | 3794    |
| 1 | 211951978 | 211952204 | 227 | 211952070 | 9.22287  | 5.47958 | 4.30742  | ENSG00000143493:intron                              | ENSG00000233626 | 211936248-211936634 | + | 15842   |
| 1 | 211939906 | 211940179 | 274 | 211940092 | 8.98232  | 4.95279 | 4.10924  | intergenic                                          | ENSG00000233626 | 211936248-211936634 | + | 3794    |
| 1 | 211951978 | 211952204 | 227 | 211952070 | 9.22287  | 5.47958 | 4.30742  | ENSG00000143493:intron                              | ENSG00000233626 | 211936248-211936634 | + | 15842   |
| 1 | 212074590 | 212074849 | 260 | 212074715 | 6.40497  | 4.32872 | 1.88441  | ENSG00000143476:intron                              | ENSG00000264358 | 212077612-212077685 | + | -2893   |
| 1 | 212225885 | 212226404 | 520 | 212225967 | 4.04884  | 3.27164 | 0.47041  | ENSG00000226251:intron                              | ENSG00000226251 | 212225277-212238977 | - | 12833   |
| 1 | 212426822 | 212427041 | 220 | 212426942 | 4.91672  | 3.56669 | 0.82412  | intergenic                                          | ENSG00000117691 | 212432886-212446379 | + | -5955   |
| 1 | 214404229 | 214404495 | 267 | 214404371 | 6.57074  | 4.43068 | 2.0119   | ENSG00000152104:intron                              | ENSG00000228470 | 214344171-214357615 | - | -46746  |
| 1 | 215766737 | 215767038 | 302 | 215766794 | 4.42776  | 3.51628 | 0.59373  | ENSG00000042781:intron                              | ENSG00000229242 | 215886581-215901464 | + | -119694 |
| 1 | 215767997 | 215768311 | 315 | 215768093 | 4.50398  | 3.56566 | 0.59373  | ENSG00000042781:intron                              | ENSG00000229242 | 215886581-215901464 | + | -118427 |
| 1 | 215766737 | 215767038 | 302 | 215766794 | 4.42776  | 3.51628 | 0.59373  | ENSG00000042781:intron                              | ENSG00000229242 | 215886581-215901464 | + | -119694 |
| 1 | 215767997 | 215768311 | 315 | 215768093 | 4.50398  | 3.56566 | 0.59373  | ENSG00000042781:intron                              | ENSG00000229242 | 215886581-215901464 | + | -118427 |
| 1 | 217850303 | 217850664 | 362 | 217850545 | 5.39424  | 4.00432 | 1.09512  | ENSG00000228247:exon;ENS<br>G00000162814:intron     | ENSG00000228247 | 217850402-217850633 | - | 150     |

|    |           |           |     |           |           |          |           |                                                                                           |                 |                     |   |         |
|----|-----------|-----------|-----|-----------|-----------|----------|-----------|-------------------------------------------------------------------------------------------|-----------------|---------------------|---|---------|
| 1  | 218459964 | 218460264 | 301 | 218460100 | 23. 87116 | 8. 93408 | 18. 10983 | intergenic                                                                                | ENSG00000281453 | 218442625-218443996 | + | 17488   |
| 1  | 219542450 | 219542671 | 222 | 219542508 | 6. 49439  | 4. 38367 | 1. 95029  | intergenic                                                                                | ENSG00000238232 | 219557191-219557701 | + | -14631  |
| 1  | 220611465 | 220611687 | 223 | 220611619 | 3. 658    | 3. 12558 | 0. 30123  | ENSG00000116141:intron                                                                    | ENSG00000233012 | 220625739-220628056 | + | -14163  |
| 1  | 221839874 | 221840129 | 256 | 221839994 | 11. 51664 | 5. 74538 | 6. 39216  | ENSG00000227925:intron                                                                    | ENSG00000227925 | 221827665-221840666 | - | 665     |
| 1  | 221961741 | 221961974 | 234 | 221961845 | 11. 51693 | 6. 17716 | 6. 39216  | ENSG00000238042:intron                                                                    | ENSG00000228437 | 221966340-221984964 | + | -4483   |
| 1  | 222035410 | 222035794 | 385 | 222035755 | 3. 4812   | 3. 00892 | 0. 30123  | intergenic                                                                                | ENSG00000232679 | 222041704-222064763 | - | 29161   |
| 1  | 223726750 | 223727041 | 292 | 223726869 | 14. 34352 | 6. 37517 | 8. 98905  | ENSG00000162909:intron                                                                    | ENSG00000162909 | 223701592-223776018 | + | 25303   |
| 1  | 226662800 | 226663227 | 428 | 226662957 | 14. 77784 | 5. 80629 | 9. 39293  | ENSG00000228382:intron;E                                                                  | ENSG00000228548 | 226668896-226676345 | + | -5883   |
| 1  | 226711935 | 226712182 | 248 | 226712098 | 4. 93372  | 3. 32789 | 0. 83448  | NSG00000143772:intron                                                                     | ENSG00000143772 | 226631689-226739323 | - | 27265   |
| 1  | 227223334 | 227223661 | 328 | 227223459 | 4. 91514  | 3. 56573 | 0. 82412  | ENSG00000143776:intron                                                                    | ENSG00000228729 | 227234268-227235355 | + | -10771  |
| 1  | 229135283 | 229135539 | 257 | 229135397 | 5. 63467  | 4. 009   | 1. 29399  | intergenic                                                                                | ENSG00000236975 | 229092814-229094905 | - | -40505  |
| 1  | 229441074 | 229441441 | 368 | 229441215 | 18. 30409 | 7. 95497 | 12. 73054 | ENSG00000069248:three_pr<br>ime_UTR;ENSG00000069248:<br>exon;ENSG00000226920:Pro<br>moter | ENSG00000226920 | 229440283-229441020 | - | -237    |
| 1  | 230084652 | 230084941 | 290 | 230084785 | 5. 66875  | 3. 88202 | 1. 31047  | ENSG00000143641:intron                                                                    | ENSG00000143641 | 230057989-230282124 | + | 26807   |
| 1  | 230781639 | 230781884 | 246 | 230781788 | 7. 34679  | 4. 23292 | 2. 66603  | ENSG00000244137:intron;E                                                                  | ENSG00000244137 | 230710697-230795492 | - | 13731   |
| 1  | 231224848 | 231225092 | 245 | 231225008 | 5. 22474  | 3. 89619 | 1. 05478  | NSG00000135773:intron                                                                     | ENSG00000143633 | 231223762-231241187 | - | 16217   |
| 1  | 233294964 | 233295212 | 249 | 233295093 | 8. 13775  | 4. 49748 | 3. 3598   | ENSG00000135749:intron                                                                    | ENSG00000135749 | 232983434-233295713 | - | 625     |
| 1  | 234066380 | 234066601 | 222 | 234066408 | 4. 07388  | 3. 28775 | 0. 47041  | ENSG00000183780:intron                                                                    | ENSG00000236101 | 234026850-234027227 | - | -39263  |
| 1  | 234270724 | 234270947 | 224 | 234270845 | 5. 48809  | 3. 9179  | 1. 17181  | ENSG00000231272:intron;E                                                                  | ENSG00000236244 | 234268582-234272500 | - | 1665    |
| 1  | 234608089 | 234608407 | 319 | 234608211 | 12. 26758 | 5. 7359  | 7. 07326  | NSG00000183780:intron;EN<br>SG00000236244:intron<br>ENSG00000228830:intron;E              | ENSG00000228830 | 234607007-234609483 | + | 1240    |
| 1  | 234668576 | 234668832 | 257 | 234668685 | 7. 77693  | 4. 99605 | 3. 05159  | NSG00000168264:intron                                                                     | ENSG00000228830 | 234607007-234609483 | + | 1240    |
| 1  | 234772371 | 234772675 | 305 | 234772528 | 15. 77144 | 6. 65577 | 10. 31754 | ENSG00000228044:intron                                                                    | ENSG00000241475 | 234660270-234667104 | + | 8433    |
| 1  | 234942203 | 234942425 | 223 | 234942346 | 3. 88371  | 3. 16559 | 0. 37576  | intergenic                                                                                | ENSG00000279261 | 234757618-234760056 | - | -12466  |
| 1  | 234960195 | 234960422 | 228 | 234960251 | 5. 02628  | 3. 63351 | 0. 90528  | intergenic                                                                                | ENSG00000237520 | 234957230-234959989 | + | -14916  |
| 1  | 234962779 | 234963004 | 226 | 234962927 | 4. 47965  | 3. 18758 | 0. 59373  | ENSG00000238005:intron                                                                    | ENSG00000237520 | 234957230-234959989 | + | 3078    |
| 1  | 234942203 | 234942425 | 223 | 234942346 | 3. 88371  | 3. 16559 | 0. 37576  | ENSG00000238005:intron                                                                    | ENSG00000237520 | 234957230-234959989 | + | 5661    |
| 1  | 234960195 | 234960422 | 228 | 234960251 | 5. 02628  | 3. 63351 | 0. 90528  | intergenic                                                                                | ENSG00000237520 | 234957230-234959989 | + | -14916  |
| 1  | 234962779 | 234963004 | 226 | 234962927 | 4. 47965  | 3. 18758 | 0. 59373  | ENSG00000238005:intron                                                                    | ENSG00000237520 | 234957230-234959989 | + | 3078    |
| 1  | 235011703 | 235012078 | 376 | 235011866 | 21. 00541 | 6. 96346 | 15. 3404  | ENSG00000238005:intron                                                                    | ENSG00000237520 | 234957230-234959989 | + | 5661    |
| 1  | 237174379 | 237174611 | 233 | 237174520 | 4. 84177  | 3. 65305 | 0. 77787  | intergenic                                                                                | ENSG00000258082 | 234979646-234980804 | - | -31086  |
| 1  | 238278423 | 238278716 | 294 | 238278667 | 4. 07388  | 3. 28775 | 0. 47041  | ENSG00000198626:intron                                                                    | ENSG00000252396 | 237120806-237121109 | + | 53688   |
| 1  | 238289391 | 238289618 | 228 | 238289528 | 5. 39424  | 4. 00432 | 1. 09512  | ENSG00000234464:intron                                                                    | ENSG00000234464 | 238276036-238287016 | + | 2533    |
| 1  | 238296189 | 238296547 | 359 | 238296333 | 5. 39424  | 4. 00432 | 1. 09512  | intergenic                                                                                | ENSG00000234464 | 238276036-238287016 | + | 13468   |
| 1  | 239915044 | 239915342 | 299 | 239915164 | 6. 40497  | 4. 32872 | 1. 88441  | intergenic                                                                                | ENSG00000234464 | 238276036-238287016 | + | 20331   |
| 1  | 241928871 | 241929110 | 240 | 241929062 | 3. 658    | 3. 12558 | 0. 30123  | intergenic                                                                                | ENSG00000231979 | 239915438-239916955 | - | 1762    |
| 1  | 242800960 | 242801253 | 294 | 242801056 | 4. 56295  | 3. 60388 | 0. 59373  | intergenic                                                                                | ENSG00000235990 | 241916122-241916543 | + | 12868   |
| 1  | 243596398 | 243596715 | 318 | 243596569 | 12. 09514 | 6. 7541  | 6. 92642  | intergenic                                                                                | ENSG00000215800 | 242772619-242773103 | + | 28487   |
| 1  | 244135381 | 244135873 | 493 | 244135756 | 4. 91514  | 3. 56573 | 0. 82412  | ENSG00000117020:intron                                                                    | ENSG00000226766 | 243624665-243625056 | - | 28500   |
| 1  | 244628981 | 244629261 | 281 | 244629032 | 4. 53506  | 3. 5858  | 0. 59373  | intergenic                                                                                | ENSG00000237759 | 244107364-244109011 | + | 28262   |
| 1  | 245686481 | 245686736 | 256 | 245686527 | 4. 62651  | 3. 51732 | 0. 63659  | ENSG00000179397:intron                                                                    | ENSG00000121644 | 244652934-244709033 | + | -23813  |
| 1  | 245891850 | 245892164 | 315 | 245892063 | 4. 22478  | 3. 38503 | 0. 55558  | ENSG00000162849:exon                                                                      | ENSG00000231612 | 245673731-245676478 | - | -10130  |
| 10 | 3758110   | 3758356   | 247 | 3758285   | 9. 06429  | 5. 18652 | 4. 17525  | ENSG00000185420:intron                                                                    | ENSG00000235096 | 246025896-246035603 | + | -133889 |
| 10 | 3805852   | 3806078   | 227 | 3805998   | 7. 62455  | 4. 90256 | 2. 91067  | ENSG00000229672:intron                                                                    | ENSG00000229672 | 3751066-3763226     | + | 7166    |
|    |           |           |     |           |           |          |           | intergenic                                                                                | ENSG00000067082 | 3775995-3785281     | - | -20683  |

|    |           |           |     |           |          |         |          |                                                      |                 |                     |   |         |
|----|-----------|-----------|-----|-----------|----------|---------|----------|------------------------------------------------------|-----------------|---------------------|---|---------|
| 10 | 5720861   | 5721143   | 283 | 5721111   | 3.77589  | 3.20345 | 0.30123  | ENSG00000226647:intron;E<br>NSG00000108021:intron    | ENSG00000226647 | 5712173-5744067     | - | 23065   |
| 10 | 6052643   | 6052940   | 298 | 6052815   | 18.70722 | 9.0361  | 13.12543 | ENSG00000134460:intron                               | ENSG00000134460 | 6010688-6062370     | - | 9579    |
| 10 | 6141251   | 6141478   | 228 | 6141371   | 10.00381 | 5.52486 | 5.01796  | intergenic                                           | ENSG00000170525 | 6144933-6254644     | + | -3569   |
| 10 | 10109903  | 10110237  | 335 | 10110062  | 4.56295  | 3.60388 | 0.59373  | intergenic                                           | ENSG00000224788 | 10058721-10063502   | + | 51348   |
| 10 | 12633806  | 12634186  | 381 | 12634144  | 4.56295  | 3.60388 | 0.59373  | ENSG00000183049:intron                               | ENSG00000283699 | 12653137-12653197   | + | 19201   |
| 10 | 14470328  | 14470591  | 264 | 14470529  | 3.658    | 3.12558 | 0.30123  | intergenic                                           | ENSG00000151474 | 13643705-14462142   | - | -8317   |
| 10 | 17029557  | 17029845  | 289 | 17029700  | 9.09099  | 5.60604 | 4.18865  | ENSG00000107611:intron                               | ENSG00000107611 | 16823965-17129817   | - | 100116  |
| 10 | 17228471  | 17228705  | 235 | 17228569  | 6.90414  | 4.637   | 2.29778  | ENSG00000229124:intron;E<br>NSG00000026025:intron    | ENSG00000026025 | 17228258-17237593   | + | 329     |
| 10 | 29659055  | 29659301  | 247 | 29659165  | 11.88032 | 6.15899 | 6.72383  | ENSG00000197321:intron                               | ENSG00000225976 | 29697934-29698174   | + | -38756  |
| 10 | 34994677  | 34994976  | 300 | 34994865  | 6.26578  | 4.40475 | 1.75945  | intergenic                                           | ENSG00000283000 | 34969908-34975578   | + | 24918   |
| 10 | 35023188  | 35023420  | 233 | 35023264  | 3.77589  | 3.20345 | 0.30123  | ENSG00000108094:intron                               | ENSG00000283000 | 34969908-34975578   | + | 53395   |
| 10 | 38930143  | 38930360  | 218 | 38930210  | 5.89863  | 4.02031 | 1.48878  | intergenic                                           | ENSG00000233832 | 38783003-38783108   | + | 147248  |
| 10 | 38930143  | 38930360  | 218 | 38930210  | 5.89863  | 4.02031 | 1.48878  | intergenic                                           | ENSG00000233832 | 38783003-38783108   | + | 147248  |
| 10 | 38930143  | 38930360  | 218 | 38930210  | 5.89863  | 4.02031 | 1.48878  | intergenic                                           | ENSG00000233832 | 38783003-38783108   | + | 147248  |
| 10 | 38930143  | 38930360  | 218 | 38930210  | 5.89863  | 4.02031 | 1.48878  | intergenic                                           | ENSG00000233832 | 38783003-38783108   | + | 147248  |
| 10 | 42090671  | 42090880  | 210 | 42090774  | 13.67551 | 3.09397 | 8.37417  | intergenic                                           | ENSG00000229485 | 42149309-42149549   | - | 58774   |
| 10 | 42090671  | 42090880  | 210 | 42090774  | 13.67551 | 3.09397 | 8.37417  | intergenic                                           | ENSG00000229485 | 42149309-42149549   | - | 58774   |
| 10 | 42090671  | 42090880  | 210 | 42090774  | 13.67551 | 3.09397 | 8.37417  | intergenic                                           | ENSG00000229485 | 42149309-42149549   | - | 58774   |
| 10 | 42090671  | 42090880  | 210 | 42090774  | 13.67551 | 3.09397 | 8.37417  | intergenic                                           | ENSG00000229485 | 42149309-42149549   | - | 58774   |
| 10 | 42090671  | 42090880  | 210 | 42090774  | 13.67551 | 3.09397 | 8.37417  | intergenic                                           | ENSG00000229485 | 42149309-42149549   | - | 58774   |
| 10 | 44011059  | 44011340  | 282 | 44011198  | 10.09471 | 6.00647 | 5.09428  | intergenic                                           | ENSG00000233395 | 43939002-43944466   | + | 72197   |
| 10 | 44077712  | 44078058  | 347 | 44077920  | 3.77589  | 3.20345 | 0.30123  | intergenic                                           | ENSG00000233395 | 43939002-43944466   | + | 138882  |
| 10 | 44011059  | 44011340  | 282 | 44011198  | 10.09471 | 6.00647 | 5.09428  | intergenic                                           | ENSG00000233395 | 43939002-43944466   | + | 72197   |
| 10 | 44077712  | 44078058  | 347 | 44077920  | 3.77589  | 3.20345 | 0.30123  | intergenic                                           | ENSG00000233395 | 43939002-43944466   | + | 138882  |
| 10 | 45421232  | 45421470  | 239 | 45421335  | 5.75051  | 3.78743 | 1.36222  | ENSG00000012779:intron                               | ENSG00000231964 | 45444569-45453121   | - | 31770   |
| 10 | 48963742  | 48964037  | 296 | 48963987  | 3.34993  | 2.92244 | 0.30123  | ENSG00000128815:exon                                 | ENSG00000226576 | 48984563-49018897   | + | -20674  |
| 10 | 62187720  | 62187972  | 253 | 62187814  | 5.39424  | 4.00432 | 1.09512  | intergenic                                           | ENSG00000182010 | 62183034-62268707   | - | 80861   |
| 10 | 71206947  | 71207259  | 313 | 71207034  | 4.56295  | 3.60388 | 0.59373  | intergenic                                           | ENSG00000107731 | 71212569-71302864   | + | -5466   |
| 10 | 72133574  | 72133849  | 276 | 72133703  | 6.5896   | 4.44231 | 2.02209  | ENSG00000138303:intron                               | ENSG00000107742 | 72059034-72089032   | - | -44679  |
| 10 | 73118067  | 73118349  | 283 | 73118208  | 11.96999 | 6.67886 | 6.80751  | ENSG00000166321:intron                               | ENSG00000272599 | 73124572-73125532   | - | 7324    |
| 10 | 75106900  | 75107116  | 217 | 75106968  | 3.49438  | 2.91742 | 0.30123  | ENSG00000079393:intron                               | ENSG00000079393 | 75094431-75109221   | - | 2213    |
| 10 | 80196277  | 80196511  | 235 | 80196415  | 11.01631 | 5.89057 | 5.93639  | ENSG00000122359:intron                               | ENSG00000122359 | 80150888-80205572   | - | 9178    |
| 10 | 86272689  | 86272946  | 258 | 86272826  | 5.39424  | 4.00432 | 1.09512  | ENSG00000182771:intron                               | ENSG00000199104 | 86264693-86264788   | - | -8029   |
| 10 | 89701647  | 89701900  | 254 | 89701720  | 3.6499   | 2.91341 | 0.30123  | ENSG00000138182:intron                               | ENSG00000138182 | 89701609-89774939   | + | 164     |
| 10 | 92101431  | 92101730  | 300 | 92101568  | 11.66864 | 5.82681 | 6.52722  | ENSG00000107864:intron                               | ENSG00000214549 | 92118663-92119164   | + | -17083  |
| 10 | 97024080  | 97024349  | 270 | 97024194  | 5.39424  | 4.00432 | 1.09512  | ENSG00000187122:intron                               | ENSG00000234855 | 97102755-97103747   | + | -78541  |
| 10 | 99298925  | 99299149  | 225 | 99299069  | 5.39424  | 4.00432 | 1.09512  | intergenic                                           | ENSG00000119946 | 99329098-99394330   | + | -30061  |
| 10 | 102776074 | 102776320 | 247 | 102776212 | 5.07624  | 3.80169 | 0.93914  | ENSG00000166272:intron                               | ENSG00000252994 | 102803928-102804031 | + | -27731  |
| 10 | 103471406 | 103471665 | 260 | 103471532 | 9.91774  | 5.27833 | 4.94121  | intergenic                                           | ENSG00000183128 | 103472803-103479240 | - | 7705    |
| 10 | 113102486 | 113102729 | 244 | 113102556 | 6.26578  | 4.40475 | 1.75945  | ENSG00000148737:intron                               | ENSG00000227560 | 112987475-112987865 | + | 115132  |
| 10 | 118154286 | 118154543 | 258 | 118154470 | 6.26578  | 4.40475 | 1.75945  | ENSG00000177640:intron                               | ENSG00000238276 | 118241563-118267710 | + | -87149  |
| 10 | 119705449 | 119705758 | 310 | 119705566 | 9.06429  | 5.18652 | 4.17525  | intergenic                                           | ENSG00000198825 | 119726041-119829278 | + | -20438  |
| 10 | 124153109 | 124153378 | 270 | 124153245 | 5.65806  | 3.7345  | 1.30082  | intergenic                                           | ENSG00000182022 | 124007665-124093607 | - | -59636  |
| 10 | 125763463 | 125763772 | 310 | 125763614 | 4.56295  | 3.60388 | 0.59373  | ENSG00000107938:intron                               | ENSG00000236991 | 125725633-125752110 | - | -11507  |
| 10 | 125917688 | 125917949 | 262 | 125917839 | 6.07691  | 3.57552 | 1.63695  | ENSG00000203780:intron                               | ENSG00000203780 | 125896538-126009592 | + | 21280   |
| 10 | 127423105 | 127423351 | 247 | 127423209 | 4.56295  | 3.60388 | 0.59373  | ENSG00000150760:intron                               | ENSG00000214285 | 127549368-127552639 | + | -126140 |
| 11 | 1572205   | 1572478   | 274 | 1572330   | 7.01358  | 3.67516 | 2.39889  | ENSG00000233930:Promoter<br>;ENSG00000184545:Promote | ENSG00000184545 | 1554043-1571920     | - | -421    |

|    |          |          |     |          |          |         |         |                                                             |                 |                   |   |        |
|----|----------|----------|-----|----------|----------|---------|---------|-------------------------------------------------------------|-----------------|-------------------|---|--------|
| 11 | 2772803  | 2773034  | 232 | 2772939  | 6.19969  | 4.04772 | 1.74352 | ENSG00000053918:intron                                      | ENSG00000236041 | 2771355-2771577   | + | 1563   |
| 11 | 3049862  | 3050148  | 287 | 3049979  | 9.63171  | 4.6211  | 4.69634 | ENSG00000110619:intron;E<br>NSG00000201616:Promoter         | ENSG00000201616 | 3048358-3048521   | - | -1483  |
| 11 | 3065883  | 3066100  | 218 | 3065945  | 4.21084  | 3.37603 | 0.54478 | intergenic                                                  | ENSG00000110619 | 3000921-3057613   | - | -8378  |
| 11 | 3930444  | 3930662  | 219 | 3930445  | 3.49438  | 2.91742 | 0.30123 | ENSG00000167323:intron                                      | ENSG00000206976 | 3922566-3922703   | + | 7986   |
| 11 | 4699740  | 4700035  | 296 | 4699868  | 14.11396 | 6.05711 | 8.77833 | intergenic                                                  | ENSG00000167332 | 4680170-4697854   | - | -2033  |
| 11 | 8757569  | 8757806  | 238 | 8757644  | 3.13189  | 2.77921 | 0.21867 | ENSG00000166444:intron                                      | ENSG00000255159 | 8768777-8810231   | + | -11090 |
| 11 | 8795136  | 8795497  | 362 | 8795344  | 5.73591  | 4.07212 | 1.35894 | ENSG00000166444:intron;E<br>NSG00000255159:intron           | ENSG00000255159 | 8768777-8810231   | + | 26539  |
| 11 | 9565937  | 9566268  | 332 | 9566029  | 4.91514  | 3.56573 | 0.82412 | intergenic                                                  | ENSG00000166483 | 9573680-9593457   | + | -7578  |
| 11 | 9593657  | 9593906  | 250 | 9593689  | 4.56295  | 3.60388 | 0.59373 | intergenic                                                  | ENSG00000243964 | 9606141-9606609   | + | -12360 |
| 11 | 9613157  | 9613445  | 289 | 9613263  | 10.60166 | 5.08797 | 5.56659 | intergenic                                                  | ENSG00000243964 | 9606141-9606609   | + | 7159   |
| 11 | 9593657  | 9593906  | 250 | 9593689  | 4.56295  | 3.60388 | 0.59373 | intergenic                                                  | ENSG00000243964 | 9606141-9606609   | + | -12360 |
| 11 | 9613157  | 9613445  | 289 | 9613263  | 10.60166 | 5.08797 | 5.56659 | intergenic                                                  | ENSG00000243964 | 9606141-9606609   | + | 7159   |
| 11 | 9940957  | 9941263  | 307 | 9941070  | 3.71102  | 3.1606  | 0.30123 | ENSG00000133812:intron                                      | ENSG00000254765 | 9958743-9959790   | - | 18680  |
| 11 | 10514622 | 10514897 | 276 | 10514795 | 3.658    | 3.12558 | 0.30123 | ENSG00000110315:exon;ENS<br>G00000110315:three_prime<br>UTR | ENSG00000255823 | 10507886-10509189 | - | -5570  |
| 11 | 10657519 | 10657769 | 251 | 10657577 | 8.95304  | 4.76203 | 4.09227 | ENSG00000072952:intron                                      | ENSG00000072952 | 10573090-10693988 | - | 36344  |
| 11 | 10758898 | 10759255 | 358 | 10759166 | 4.56295  | 3.60388 | 0.59373 | ENSG00000198730:intron                                      | ENSG00000198730 | 10750986-10801625 | + | 8090   |
| 11 | 11154049 | 11154540 | 492 | 11154343 | 7.3143   | 4.5382  | 2.6406  | ENSG00000254401:intron                                      | ENSG00000254957 | 11135481-11137658 | + | 18813  |
| 11 | 14807301 | 14807753 | 453 | 14807598 | 5.39424  | 4.00432 | 1.09512 | ENSG00000152270:intron                                      | ENSG00000186104 | 14877439-14892252 | - | 84725  |
| 11 | 17391702 | 17391941 | 240 | 17391832 | 7.84906  | 4.50457 | 3.11977 | intergenic                                                  | ENSG00000187486 | 17385858-17389331 | - | -2490  |
| 11 | 17795697 | 17795944 | 248 | 17795718 | 4.2388   | 3.39408 | 0.56297 | ENSG00000129159:intron;E<br>NSG00000129158:intron           | ENSG00000129159 | 17734773-17856804 | + | 61047  |
| 11 | 18577360 | 18577600 | 241 | 18577431 | 5.24168  | 3.90698 | 1.06394 | ENSG00000151116:intron                                      | ENSG00000151116 | 18529608-18588747 | - | 11267  |
| 11 | 19056029 | 19056348 | 320 | 19056097 | 3.49438  | 2.91742 | 0.30123 | ENSG00000183695:exon                                        | ENSG00000183695 | 19054454-19060681 | - | 4493   |
| 11 | 19442280 | 19442571 | 292 | 19442474 | 14.10904 | 6.25734 | 8.77684 | ENSG00000166833:intron                                      | ENSG00000200687 | 19401871-19401981 | - | -40444 |
| 11 | 19660243 | 19660499 | 257 | 19660348 | 7.58982  | 3.93998 | 2.87738 | ENSG00000166833:intron                                      | ENSG00000270607 | 19710933-19712619 | - | 52248  |
| 11 | 19678826 | 19679054 | 229 | 19679051 | 3.02441  | 2.62206 | 0.15111 | ENSG00000166833:intron                                      | ENSG00000270607 | 19710933-19712619 | - | 33679  |
| 11 | 19888196 | 19888578 | 383 | 19888330 | 6.26578  | 4.40475 | 1.75945 | ENSG00000166833:intron                                      | ENSG00000254542 | 19978698-19981337 | - | 92950  |
| 11 | 19890739 | 19890948 | 210 | 19890850 | 4.97105  | 3.59979 | 0.86452 | ENSG00000166833:intron                                      | ENSG00000254542 | 19978698-19981337 | - | 90494  |
| 11 | 21071509 | 21071842 | 334 | 21071648 | 3.77589  | 3.20345 | 0.30123 | ENSG00000165973:intron                                      | ENSG00000201059 | 21000880-21000997 | - | -70678 |
| 11 | 29513314 | 29513593 | 280 | 29513500 | 5.39424  | 4.00432 | 1.09512 | ENSG00000254530:intron                                      | ENSG00000255029 | 29519075-29552639 | + | -5622  |
| 11 | 33596643 | 33596859 | 217 | 33596688 | 4.49014  | 3.43176 | 0.59373 | ENSG00000110427:intron                                      | ENSG00000255202 | 33665219-33696701 | - | 99950  |
| 11 | 34859977 | 34860199 | 223 | 34860070 | 4.35972  | 3.35026 | 0.59373 | ENSG00000149089:intron                                      | ENSG00000110435 | 34915828-35020591 | + | -55740 |
| 11 | 34874980 | 34875264 | 285 | 34875233 | 4.56295  | 3.60388 | 0.59373 | ENSG00000149089:three_prime<br>UTR;ENSG00000149089:<br>exon | ENSG00000110435 | 34915828-35020591 | + | -40706 |
| 11 | 35029907 | 35030271 | 365 | 35030090 | 8.134    | 4.66145 | 3.3598  | intergenic                                                  | ENSG00000251862 | 34941836-34941920 | + | 88252  |
| 11 | 35040672 | 35040939 | 268 | 35040857 | 10.60417 | 4.76945 | 5.56702 | intergenic                                                  | ENSG00000255521 | 35132654-35138032 | - | 97227  |
| 11 | 35144308 | 35144540 | 233 | 35144410 | 8.17781  | 4.86367 | 3.38531 | ENSG00000026508:intron                                      | ENSG00000026508 | 35138869-35232402 | + | 5554   |
| 11 | 36149719 | 36150039 | 321 | 36149876 | 11.1261  | 6.40691 | 6.0347  | ENSG00000179241:intron                                      | ENSG00000280321 | 36196247-36197901 | + | -46368 |
| 11 | 37504102 | 37504440 | 339 | 37504305 | 9.85502  | 5.24413 | 4.88402 | intergenic                                                  | ENSG00000251838 | 37702124-37702220 | - | 197949 |
| 11 | 41309311 | 41309536 | 226 | 41309429 | 9.59377  | 5.70253 | 4.65976 | ENSG00000148948:intron                                      | ENSG00000255132 | 41394594-41426504 | + | -85171 |
| 11 | 41320362 | 41320565 | 204 | 41320439 | 5.6497   | 4.01836 | 1.29426 | ENSG00000148948:intron                                      | ENSG00000255132 | 41394594-41426504 | + | -74131 |
| 11 | 44461854 | 44462199 | 346 | 44461881 | 3.38583  | 2.94608 | 0.30123 | intergenic                                                  | ENSG00000255451 | 44468463-44470429 | + | -6437  |
| 11 | 44498335 | 44498641 | 307 | 44498566 | 4.04884  | 3.27164 | 0.47041 | intergenic                                                  | ENSG00000255451 | 44468463-44470429 | + | 30024  |
| 11 | 44461854 | 44462199 | 346 | 44461881 | 3.38583  | 2.94608 | 0.30123 | intergenic                                                  | ENSG00000255451 | 44468463-44470429 | + | -6437  |
| 11 | 44498335 | 44498641 | 307 | 44498566 | 4.04884  | 3.27164 | 0.47041 | intergenic                                                  | ENSG00000255451 | 44468463-44470429 | + | 30024  |
| 11 | 44862364 | 44862605 | 242 | 44862440 | 6.32374  | 4.12047 | 1.8138  | ENSG00000157570:intron                                      | ENSG00000175274 | 44885902-44951306 | - | 88822  |



|    |          |          |     |          |          |         |          |                                                                                                     |                 |                   |   |        |
|----|----------|----------|-----|----------|----------|---------|----------|-----------------------------------------------------------------------------------------------------|-----------------|-------------------|---|--------|
| 11 | 45188236 | 45188643 | 408 | 45188478 | 4.00982  | 3.24654 | 0.45978  | ENSG00000019485:intron                                                                              | ENSG00000254664 | 45215814-45235292 | - | 46853  |
| 11 | 46092717 | 46092956 | 240 | 46092915 | 4.1849   | 3.24157 | 0.52478  | ENSG00000135365:intron                                                                              | ENSG00000254653 | 46116577-46117318 | + | -23741 |
| 11 | 55658090 | 55658310 | 221 | 55658170 | 5.26629  | 3.39198 | 1.07888  | intergenic                                                                                          | ENSG00000181903 | 55662200-55666195 | + | -4000  |
| 11 | 55722575 | 55722812 | 238 | 55722715 | 6.26578  | 4.40475 | 1.75945  | ENSG00000186886:Promoter                                                                            | ENSG00000186886 | 55723775-55729621 | + | -1082  |
| 11 | 57216309 | 57216543 | 235 | 57216332 | 4.50398  | 3.56566 | 0.59373  | intergenic                                                                                          | ENSG00000134817 | 57233576-57237314 | + | 20888  |
| 11 | 57685985 | 57686286 | 302 | 57686046 | 4.14216  | 3.33173 | 0.51073  | ENSG00000156599:intron                                                                              | ENSG00000156599 | 57667746-57701187 | - | 18389  |
| 11 | 57686566 | 57686783 | 218 | 57686737 | 3.77589  | 3.20345 | 0.30123  | ENSG00000156599:intron                                                                              | ENSG00000156599 | 57667746-57701187 | + | 18928  |
| 11 | 59431188 | 59431416 | 229 | 59431239 | 4.28127  | 3.42152 | 0.58762  | intergenic                                                                                          | ENSG00000172324 | 59416968-59426412 | - | -4889  |
| 11 | 60594303 | 60594575 | 273 | 60594423 | 9.09099  | 5.60604 | 4.18865  | ENSG00000283601:intron                                                                              | ENSG00000283601 | 60577855-60608418 | + | 16583  |
| 11 | 60732186 | 60732493 | 308 | 60732276 | 3.19543  | 2.82089 | 0.25814  | ENSG00000214782:intron                                                                              | ENSG00000214782 | 60729303-60744212 | + | 3036   |
| 11 | 60915538 | 60915812 | 275 | 60915675 | 9.79137  | 5.02659 | 4.83571  | ENSG00000110108:intron;E                                                                            | ENSG00000256944 | 60913165-60914052 | - | -1622  |
| 11 | 62556527 | 62557020 | 494 | 62556768 | 9.79137  | 5.02659 | 4.83571  | intergenic                                                                                          | ENSG00000124942 | 62433541-62556235 | - | -538   |
| 11 | 63958462 | 63958736 | 275 | 63958539 | 3.02441  | 2.62206 | 0.15111  | intergenic                                                                                          | ENSG00000207200 | 63970469-63970576 | + | -11870 |
| 11 | 65382329 | 65382626 | 298 | 65382500 | 14.11417 | 6.47532 | 8.77833  | ENSG00000162241:five_prime_UTR;ENSG00000162241:exon                                                 | ENSG00000162241 | 65375191-65383701 | - | 1224   |
| 11 | 65422107 | 65422355 | 249 | 65422216 | 5.86439  | 3.26245 | 1.4602   | ENSG00000277599:Promoter;ENSG00000278144:Promoter;ENSG00000278050:Promoter;ENSG00000245532:Promoter | ENSG00000245532 | 65422773-65445540 | + | -542   |
| 11 | 65588127 | 65588601 | 475 | 65588480 | 7.49188  | 4.02246 | 2.78905  | ENSG00000173442:intron                                                                              | ENSG00000173338 | 65592854-65595996 | - | 7632   |
| 11 | 69166550 | 69166891 | 342 | 69166735 | 18.41914 | 7.75626 | 12.84432 | ENSG00000261070:intron                                                                              | ENSG00000261070 | 69147227-69171564 | - | 4844   |
| 11 | 69216535 | 69216780 | 246 | 69216720 | 3.49438  | 2.91742 | 0.30123  | intergenic                                                                                          | ENSG00000261070 | 69147227-69171564 | - | -45093 |
| 11 | 69220766 | 69220998 | 233 | 69220866 | 6.90414  | 4.637   | 2.29778  | intergenic                                                                                          | ENSG00000261070 | 69147227-69171564 | - | -49317 |
| 11 | 69166550 | 69166891 | 342 | 69166735 | 18.41914 | 7.75626 | 12.84432 | ENSG00000261070:intron                                                                              | ENSG00000261070 | 69147227-69171564 | - | 4844   |
| 11 | 69216535 | 69216780 | 246 | 69216720 | 3.49438  | 2.91742 | 0.30123  | intergenic                                                                                          | ENSG00000261070 | 69147227-69171564 | - | -45093 |
| 11 | 69220766 | 69220998 | 233 | 69220866 | 6.90414  | 4.637   | 2.29778  | intergenic                                                                                          | ENSG00000261070 | 69147227-69171564 | - | -49317 |
| 11 | 69166550 | 69166891 | 342 | 69166735 | 18.41914 | 7.75626 | 12.84432 | ENSG00000261070:intron                                                                              | ENSG00000261070 | 69147227-69171564 | - | 4844   |
| 11 | 69216535 | 69216780 | 246 | 69216720 | 3.49438  | 2.91742 | 0.30123  | intergenic                                                                                          | ENSG00000261070 | 69147227-69171564 | - | -45093 |
| 11 | 69220766 | 69220998 | 233 | 69220866 | 6.90414  | 4.637   | 2.29778  | intergenic                                                                                          | ENSG00000261070 | 69147227-69171564 | - | -49317 |
| 11 | 69900496 | 69900740 | 245 | 69900687 | 3.77589  | 3.20345 | 0.30123  | intergenic                                                                                          | ENSG00000260348 | 69909183-69910994 | - | 10376  |
| 11 | 71197532 | 71197815 | 284 | 71197673 | 7.17425  | 4.80518 | 2.52654  | ENSG00000162105:intron                                                                              | ENSG00000162105 | 70467855-71252577 | - | 54904  |
| 11 | 71204374 | 71204581 | 208 | 71204466 | 4.07388  | 3.28775 | 0.47041  | ENSG00000162105:intron                                                                              | ENSG00000162105 | 70467855-71252577 | - | 48100  |
| 11 | 72828113 | 72828393 | 281 | 72828241 | 7.02298  | 4.36872 | 2.40809  | ENSG00000168010:intron                                                                              | ENSG00000168010 | 72814307-72843674 | + | 13945  |
| 11 | 73779703 | 73779951 | 249 | 73779889 | 5.42584  | 3.06915 | 1.11564  | intergenic                                                                                          | ENSG00000175581 | 73787315-73865133 | + | -7488  |
| 11 | 74382116 | 74382434 | 319 | 74382224 | 4.23481  | 3.27254 | 0.56211  | ENSG00000165434:intron                                                                              | ENSG00000254631 | 74397548-74485742 | + | -15273 |
| 11 | 74953693 | 74954013 | 321 | 74953855 | 5.77031  | 4.0936  | 1.37979  | ENSG00000118363:intron                                                                              | ENSG00000118363 | 74949246-74979031 | + | 4606   |
| 11 | 77738961 | 77739192 | 232 | 77738984 | 4.11506  | 3.19834 | 0.49781  | ENSG00000255409:intron;E                                                                            | ENSG00000255409 | 77738679-77739568 | - | 492    |
| 11 | 78860284 | 78860490 | 207 | 78860358 | 3.07013  | 2.73874 | 0.17545  | ENSG00000048649:intron                                                                              | ENSG00000254563 | 78749249-78756480 | + | 111137 |
| 11 | 79030815 | 79031203 | 389 | 79030967 | 5.66809  | 4.02982 | 1.31021  | ENSG00000149256:intron                                                                              | ENSG00000255345 | 79092847-79098003 | + | -61838 |
| 11 | 80042576 | 80042795 | 220 | 80042696 | 4.00982  | 3.24654 | 0.45978  | intergenic                                                                                          | ENSG00000254471 | 79987512-79989630 | + | 55173  |
| 11 | 80501606 | 80501858 | 253 | 80501783 | 6.47779  | 4.37345 | 1.94623  | intergenic                                                                                          | ENSG00000200146 | 80527959-80528066 | + | -26227 |
| 11 | 81107830 | 81108134 | 305 | 81107834 | 4.383    | 3.48731 | 0.59373  | intergenic                                                                                          | ENSG00000285568 | 81015848-81040236 | + | 92133  |
| 11 | 82975370 | 82975613 | 244 | 82975575 | 4.37258  | 3.23911 | 0.59373  | ENSG00000137502:three_prime_UTR;ENSG00000254698:intron;ENSG00000137502:exon                         | ENSG00000137509 | 82823501-82970584 | - | -4907  |

|    |          |          |     |          |         |         |         |                                                                             |                 |                   |   |        |
|----|----------|----------|-----|----------|---------|---------|---------|-----------------------------------------------------------------------------|-----------------|-------------------|---|--------|
| 11 | 82978505 | 82978770 | 266 | 82978594 | 6.38722 | 4.15784 | 1.8702  | ENSG00000137502:three_prime_UTR;ENSG00000254698:intron;ENSG00000137502:exon | ENSG00000137509 | 82823501-82970584 | - | -8053  |
| 11 | 82997252 | 82997522 | 271 | 82997418 | 9.87853 | 4.44888 | 4.90548 | ENSG00000254698:intron;ENSG00000137502:intron                               | ENSG00000137509 | 82823501-82970584 | - | -26802 |
| 11 | 82975370 | 82975613 | 244 | 82975575 | 4.37258 | 3.23911 | 0.59373 | ENSG00000137502:three_prime_UTR;ENSG00000254698:intron;ENSG00000137502:exon | ENSG00000137509 | 82823501-82970584 | - | -4907  |
| 11 | 82978505 | 82978770 | 266 | 82978594 | 6.38722 | 4.15784 | 1.8702  | ENSG00000137502:three_prime_UTR;ENSG00000254698:intron;ENSG00000137502:exon | ENSG00000137509 | 82823501-82970584 | - | -8053  |
| 11 | 82997252 | 82997522 | 271 | 82997418 | 9.87853 | 4.44888 | 4.90548 | ENSG00000254698:intron;ENSG00000137502:intron                               | ENSG00000137509 | 82823501-82970584 | - | -26802 |
| 11 | 83573837 | 83574150 | 314 | 83573969 | 3.77589 | 3.20345 | 0.30123 | ENSG00000150672:intron                                                      | ENSG00000255311 | 83643601-83725390 | + | -69608 |
| 11 | 83662907 | 83663123 | 217 | 83662925 | 3.29424 | 2.88581 | 0.30123 | ENSG00000255311:intron;ENSG00000150672:intron                               | ENSG00000255311 | 83643601-83725390 | + | 19413  |
| 11 | 83791079 | 83791395 | 317 | 83791292 | 4.45692 | 3.17469 | 0.59373 | ENSG00000254629:exon;ENSG00000150672:intron                                 | ENSG00000254629 | 83789976-83791578 | - | 341    |
| 11 | 84289469 | 84289681 | 213 | 84289601 | 5.56876 | 3.96799 | 1.238   | ENSG00000150672:intron                                                      | ENSG00000254713 | 84545130-84546846 | - | 257271 |
| 11 | 84471684 | 84472075 | 392 | 84471913 | 4.16942 | 3.34931 | 0.52478 | ENSG00000150672:intron                                                      | ENSG00000254713 | 84545130-84546846 | - | 74967  |
| 11 | 84546237 | 84546494 | 258 | 84546451 | 3.02441 | 2.62206 | 0.15111 | ENSG00000150672:intron;ENSG00000254713:intron                               | ENSG00000254713 | 84545130-84546846 | - | 481    |
| 11 | 84289469 | 84289681 | 213 | 84289601 | 5.56876 | 3.96799 | 1.238   | ENSG00000150672:intron                                                      | ENSG00000254713 | 84545130-84546846 | - | 257271 |
| 11 | 84471684 | 84472075 | 392 | 84471913 | 4.16942 | 3.34931 | 0.52478 | ENSG00000150672:intron                                                      | ENSG00000254713 | 84545130-84546846 | - | 74967  |
| 11 | 84546237 | 84546494 | 258 | 84546451 | 3.02441 | 2.62206 | 0.15111 | ENSG00000150672:intron;ENSG00000254713:intron                               | ENSG00000254713 | 84545130-84546846 | - | 481    |
| 11 | 84946535 | 84946763 | 229 | 84946538 | 3.53832 | 2.94528 | 0.30123 | ENSG00000255555:intron;ENSG00000150672:intron                               | ENSG00000255555 | 84936688-84955705 | + | 9960   |
| 11 | 85042434 | 85042669 | 236 | 85042553 | 4.84177 | 3.65305 | 0.77787 | ENSG00000150672:intron                                                      | ENSG00000213305 | 85020784-85021655 | - | -20896 |
| 11 | 86705036 | 86705282 | 247 | 86705129 | 4.07388 | 3.28775 | 0.47041 | ENSG00000254731:intron                                                      | ENSG00000254731 | 86703098-86714092 | + | 2060   |
| 11 | 87173469 | 87173772 | 304 | 87173682 | 4.64049 | 3.52611 | 0.64891 | ENSG00000166575:intron                                                      | ENSG00000279836 | 87121057-87121596 | + | 52563  |
| 11 | 88295817 | 88296027 | 211 | 88295882 | 4.00012 | 3.12743 | 0.45978 | ENSG00000109861:intron                                                      | ENSG00000109861 | 88293591-88337787 | - | 41865  |
| 11 | 88297826 | 88298148 | 323 | 88298020 | 5.11088 | 3.68528 | 0.9653  | ENSG00000109861:intron                                                      | ENSG00000109861 | 88293591-88337787 | - | 39800  |
| 11 | 88884526 | 88884820 | 295 | 88884677 | 4.56295 | 3.60388 | 0.59373 | ENSG00000168959:intron                                                      | ENSG00000168959 | 88504575-89065945 | - | 181272 |
| 11 | 89057361 | 89057695 | 335 | 89057559 | 5.39424 | 4.00432 | 1.09512 | ENSG00000168959:intron                                                      | ENSG00000168959 | 88504575-89065945 | - | 8417   |
| 11 | 89174823 | 89175085 | 263 | 89174899 | 4.56295 | 3.60388 | 0.59373 | intergenic                                                                  | ENSG00000077498 | 89177451-89295759 | + | -2497  |
| 11 | 89555235 | 89555477 | 243 | 89555317 | 5.6497  | 4.01836 | 1.29426 | ENSG00000279056:Promoter;ENSG00000255429:intron                             | ENSG00000279056 | 89556859-89557205 | + | -1503  |
| 11 | 90326643 | 90327081 | 439 | 90326987 | 5.39424 | 4.00432 | 1.09512 | ENSG00000261645:intron                                                      | ENSG00000214391 | 90282559-90284172 | + | 44302  |
| 11 | 91183598 | 91183813 | 216 | 91183736 | 3.73797 | 3.1784  | 0.30123 | intergenic                                                                  | ENSG00000280124 | 91184933-91185543 | - | 1838   |
| 11 | 92156610 | 92156835 | 226 | 92156774 | 3.29424 | 2.88581 | 0.30123 | intergenic                                                                  | ENSG00000242248 | 92161105-92161889 | + | -4383  |
| 11 | 92195992 | 92196228 | 237 | 92196088 | 6.02088 | 4.25059 | 1.59152 | intergenic                                                                  | ENSG00000242248 | 92161105-92161889 | + | 35004  |
| 11 | 92214779 | 92215006 | 228 | 92214930 | 4.56295 | 3.60388 | 0.59373 | intergenic                                                                  | ENSG00000242248 | 92161105-92161889 | + | 53787  |
| 11 | 92643566 | 92643778 | 213 | 92643702 | 4.00982 | 3.24654 | 0.45978 | ENSG00000165323:intron                                                      | ENSG00000255506 | 92748731-92766867 | - | 123195 |
| 11 | 92716055 | 92716316 | 262 | 92716178 | 5.07624 | 3.80169 | 0.93914 | ENSG00000165323:intron                                                      | ENSG00000255506 | 92748731-92766867 | - | 50682  |
| 11 | 93620183 | 93620421 | 239 | 93620264 | 3.36259 | 2.93078 | 0.30123 | intergenic                                                                  | ENSG00000255515 | 93609759-93610333 | - | -9968  |
| 11 | 93890825 | 93891054 | 230 | 93890841 | 3.81246 | 2.91013 | 0.32594 | intergenic                                                                  | ENSG00000214376 | 93818231-93850531 | - | -40408 |
| 11 | 94674380 | 94674613 | 234 | 94674562 | 3.29424 | 2.88581 | 0.30123 | ENSG00000255929:intron                                                      | ENSG00000166025 | 94706430-94876753 | + | -31934 |

|    |           |           |     |           |           |          |           |                          |                 |                     |   |         |
|----|-----------|-----------|-----|-----------|-----------|----------|-----------|--------------------------|-----------------|---------------------|---|---------|
| 11 | 94850655  | 94851110  | 456 | 94850678  | 4. 7547   | 3. 59806 | 0. 74279  | ENSG00000166025:intron   | ENSG00000213368 | 94913046-94913766   | + | -62164  |
| 11 | 95147543  | 95147764  | 222 | 95147681  | 7. 68737  | 4. 41643 | 2. 97084  | intergenic               | ENSG00000270578 | 95145436-95146004   | + | 2217    |
| 11 | 95295249  | 95295525  | 277 | 95295349  | 6. 09321  | 4. 13824 | 1. 6498   | intergenic               | ENSG00000149212 | 95165512-95232541   | - | -62845  |
| 11 | 96536113  | 96536334  | 222 | 96536205  | 4. 06198  | 3. 28009 | 0. 47041  | intergenic               | ENSG00000256684 | 96508424-96514748   | + | 27799   |
| 11 | 97868307  | 97868698  | 392 | 97868612  | 3. 77589  | 3. 20345 | 0. 30123  | intergenic               | ENSG00000254555 | 97908252-97908537   | - | 40035   |
| 11 | 98742460  | 98743161  | 702 | 98743000  | 4. 56295  | 3. 60388 | 0. 59373  | intergenic               | ENSG00000254599 | 98676390-98683735   | + | 66420   |
| 11 | 99091646  | 99091861  | 216 | 99091703  | 3. 81246  | 2. 91013 | 0. 32594  | ENSG00000149972:intron   | ENSG00000233269 | 99120175-99120490   | + | -28422  |
| 11 | 99172760  | 99173168  | 409 | 99173114  | 3. 03786  | 2. 80302 | 0. 15111  | ENSG00000149972:intron   | ENSG00000223269 | 99120175-99120490   | + | 52788   |
| 11 | 100910981 | 100911197 | 217 | 100911107 | 6. 60855  | 4. 454   | 2. 0406   | ENSG00000165895:intron   | ENSG00000200047 | 100839629-100839946 | + | 71459   |
| 11 | 100936957 | 100937342 | 386 | 100936968 | 3. 77589  | 3. 20345 | 0. 30123  | ENSG00000165895:intron   | ENSG00000200047 | 100839629-100839946 | + | 97520   |
| 11 | 101722872 | 101723112 | 241 | 101723034 | 3. 93344  | 3. 19748 | 0. 41301  | ENSG00000137672:intron   | ENSG00000254534 | 101765934-101769961 | - | 46969   |
| 11 | 101775477 | 101775714 | 238 | 101775688 | 4. 48857  | 3. 55567 | 0. 59373  | ENSG00000137672:intron   | ENSG00000254534 | 101765934-101769961 | - | -5634   |
| 11 | 102643072 | 102643324 | 253 | 102643204 | 5. 15789  | 3. 85362 | 1. 00126  | intergenic               | ENSG00000137674 | 102576834-102625332 | - | -17865  |
| 11 | 102671567 | 102671800 | 234 | 102671715 | 3. 89605  | 3. 1735  | 0. 38387  | intergenic               | ENSG00000281655 | 102681309-102683913 | + | -9626   |
| 11 | 103566924 | 103567371 | 448 | 103567020 | 4. 56295  | 3. 60388 | 0. 59373  | intergenic               | ENSG00000254824 | 103409579-103409657 | - | -157490 |
| 11 | 103602596 | 103602817 | 222 | 103602801 | 3. 77589  | 3. 20345 | 0. 30123  | intergenic               | ENSG00000254824 | 103409579-103409657 | - | -193049 |
| 11 | 103848656 | 103848891 | 236 | 103848749 | 5. 07624  | 3. 80169 | 0. 93914  | ENSG00000264200:Promoter | ENSG00000264200 | 103849905-103849980 | + | -1132   |
| 11 | 104552610 | 104552865 | 256 | 104552669 | 5. 77031  | 4. 0936  | 1. 37979  | ENSG00000254987:intron   | ENSG00000256422 | 104445867-104609321 | - | 56584   |
| 11 | 104554394 | 104554663 | 270 | 104554621 | 4. 07388  | 3. 28775 | 0. 47041  | ENSG00000256422:intron   | ENSG00000256422 | 104445867-104609321 | - | 54793   |
| 11 | 104552610 | 104552865 | 256 | 104552669 | 5. 77031  | 4. 0936  | 1. 37979  | ENSG00000256422:intron   | ENSG00000256422 | 104445867-104609321 | - | 56584   |
| 11 | 104554394 | 104554663 | 270 | 104554621 | 4. 07388  | 3. 28775 | 0. 47041  | ENSG00000256422:intron   | ENSG00000256422 | 104445867-104609321 | - | 54793   |
| 11 | 104705882 | 104706113 | 232 | 104705996 | 6. 58155  | 3. 96836 | 2. 01637  | intergenic               | ENSG00000270449 | 104682382-104682581 | - | -23416  |
| 11 | 107442924 | 107443164 | 241 | 107443062 | 3. 76336  | 3. 08858 | 0. 30123  | ENSG00000152404:intron   | ENSG00000152404 | 107326344-107457844 | - | 14800   |
| 11 | 107505802 | 107506007 | 206 | 107505969 | 4. 07388  | 3. 28775 | 0. 47041  | ENSG00000137760:intron   | ENSG00000152404 | 107326344-107457844 | - | -48060  |
| 11 | 107634227 | 107634542 | 316 | 107634318 | 4. 72575  | 3. 5798  | 0. 71873  | ENSG00000110675:intron   | ENSG00000254758 | 107642886-107643871 | - | 9487    |
| 11 | 108957539 | 108957766 | 228 | 108957628 | 6. 4824   | 4. 21404 | 1. 94623  | ENSG00000203334:Promoter | ENSG00000203334 | 108957717-108959797 | + | -65     |
| 11 | 109461526 | 109461765 | 240 | 109461598 | 3. 28305  | 2. 87845 | 0. 30123  | ENSG00000255028:intron   | ENSG00000254890 | 109486967-109487424 | - | 25779   |
| 11 | 110331342 | 110331705 | 364 | 110331505 | 4. 64049  | 3. 52611 | 0. 64891  | intergenic               | ENSG00000254416 | 110355129-110406400 | + | -23606  |
| 11 | 110367230 | 110367457 | 228 | 110367319 | 4. 49014  | 3. 43176 | 0. 59373  | ENSG00000254416:intron   | ENSG00000254416 | 110355129-110406400 | + | 12214   |
| 11 | 110331342 | 110331705 | 364 | 110331505 | 4. 64049  | 3. 52611 | 0. 64891  | intergenic               | ENSG00000254416 | 110355129-110406400 | + | -23606  |
| 11 | 110367230 | 110367457 | 228 | 110367319 | 4. 49014  | 3. 43176 | 0. 59373  | ENSG00000254416:intron   | ENSG00000254416 | 110355129-110406400 | + | 12214   |
| 11 | 112412565 | 112412805 | 241 | 112412779 | 3. 9293   | 2. 97803 | 0. 41132  | ENSG00000254968:intron   | ENSG00000254968 | 112393117-112621729 | + | 19567   |
| 11 | 113230798 | 113231029 | 232 | 113230880 | 5. 32771  | 3. 96184 | 1. 09512  | ENSG00000149294:intron   | ENSG00000227487 | 113269531-113273901 | - | 42988   |
| 11 | 113519752 | 113519967 | 216 | 113519893 | 6. 74377  | 4. 53757 | 2. 15867  | intergenic               | ENSG00000149295 | 113409614-113475691 | - | -44168  |
| 11 | 114080372 | 114080642 | 271 | 114080491 | 8. 60945  | 4. 92743 | 3. 78062  | ENSG00000109906:intron   | ENSG00000109906 | 114059592-114250676 | + | 20914   |
| 11 | 114636904 | 114637185 | 282 | 114636987 | 5. 68188  | 3. 88989 | 1. 31322  | intergenic               | ENSG00000137634 | 114570590-114595762 | - | -41282  |
| 11 | 115222452 | 115222795 | 344 | 115222556 | 21. 27201 | 9. 59982 | 15. 59819 | ENSG00000182985:intron   | ENSG00000252870 | 115128217-115128373 | - | -94250  |
| 11 | 116002217 | 116002584 | 368 | 116002317 | 4. 2388   | 3. 39408 | 0. 56297  | intergenic               | ENSG00000239600 | 115951104-115951491 | - | -50909  |
| 11 | 116002217 | 116002584 | 368 | 116002317 | 4. 2388   | 3. 39408 | 0. 56297  | intergenic               | ENSG00000239600 | 115951104-115951491 | - | -50909  |
| 11 | 117254145 | 117254379 | 235 | 117254187 | 5. 56616  | 3. 82068 | 1. 238    | ENSG00000167257:intron   | ENSG00000252992 | 117263798-117263952 | + | -9536   |
| 11 | 118012256 | 118012498 | 243 | 118012404 | 7. 37023  | 4. 57095 | 2. 68538  | ENSG00000255274:intron   | ENSG00000110324 | 117986347-118003037 | + | 26029   |
| 11 | 119376555 | 119376777 | 223 | 119376672 | 4. 813    | 3. 37843 | 0. 77787  | ENSG00000254740:intron;E | ENSG00000254740 | 119372705-119381613 | + | 3960    |
| 11 | 119494775 | 119495050 | 276 | 119494917 | 4. 73338  | 3. 4555  | 0. 72598  | NSG00000036672:intron    | ENSG00000255377 | 119444990-119445519 | - | -49393  |
| 11 | 121036007 | 121036271 | 265 | 121036112 | 3. 20396  | 2. 64557 | 0. 26167  | ENSG00000285509:intron;E | ENSG00000285509 | 121024124-121113108 | + | 12014   |
| 11 | 121655969 | 121656196 | 228 | 121656189 | 3. 28281  | 2. 78383 | 0. 30123  | NSG00000154114:intron    | ENSG00000246790 | 121447330-121453013 | - | -203069 |
| 11 | 121754996 | 121755354 | 359 | 121755279 | 4. 94982  | 3. 72146 | 0. 84841  | intergenic               | ENSG00000252556 | 122004354-122004451 | + | -249179 |
| 11 | 122284860 | 122285211 | 352 | 122284931 | 4. 23481  | 3. 27254 | 0. 56211  | ENSG00000255248:intron   | ENSG00000255219 | 122295189-122308019 | + | -10154  |

|    |           |           |     |           |          |         |         |                                                                                  |                 |                     |   |         |
|----|-----------|-----------|-----|-----------|----------|---------|---------|----------------------------------------------------------------------------------|-----------------|---------------------|---|---------|
| 11 | 122810463 | 122810713 | 251 | 122810492 | 3.02441  | 2.62206 | 0.15111 | ENSG00000154127:exon;ENS<br>G00000285909:intron;ENSG<br>00000154127:three_prime_ | ENSG00000109943 | 122838499-122872639 | + | -27911  |
|    |           |           |     |           |          |         |         | IITR                                                                             |                 |                     |   |         |
| 11 | 123732337 | 123732554 | 218 | 123732443 | 5.53627  | 3.9478  | 1.2149  | ENSG00000166261:intron                                                           | ENSG00000166261 | 123724176-123741675 | - | 9230    |
| 11 | 123904010 | 123904235 | 226 | 123904142 | 8.15538  | 5.03729 | 3.3763  | ENSG00000181518:intron                                                           | ENSG00000181518 | 123902166-123909229 | + | 1956    |
| 11 | 124727351 | 124727570 | 220 | 124727471 | 5.31489  | 3.67153 | 1.09512 | intergenic                                                                       | ENSG00000154146 | 124739845-124747210 | + | -12385  |
| 11 | 125036951 | 125037178 | 228 | 125037165 | 3.6499   | 2.91341 | 0.30123 | ENSG00000149548:intron                                                           | ENSG00000134955 | 125063066-125090312 | + | -26002  |
| 11 | 127252175 | 127252562 | 388 | 127252365 | 8.134    | 4.66145 | 3.3598  | intergenic                                                                       | ENSG00000273409 | 127271028-127337033 | + | -18660  |
| 11 | 128241810 | 128242060 | 251 | 128241884 | 5.2271   | 3.75666 | 1.05667 | intergenic                                                                       | ENSG00000272575 | 128208748-128241441 | + | 33186   |
| 11 | 128342881 | 128343101 | 221 | 128342989 | 4.49014  | 3.43176 | 0.59373 | intergenic                                                                       | ENSG00000272575 | 128208748-128241441 | + | 134242  |
| 11 | 128241810 | 128242060 | 251 | 128241884 | 5.2271   | 3.75666 | 1.05667 | intergenic                                                                       | ENSG00000272575 | 128208748-128241441 | + | 33186   |
| 11 | 128342881 | 128343101 | 221 | 128342989 | 4.49014  | 3.43176 | 0.59373 | intergenic                                                                       | ENSG00000272575 | 128208748-128241441 | + | 134242  |
| 11 | 128388423 | 128388670 | 248 | 128388585 | 4.64049  | 3.52611 | 0.64891 | intergenic                                                                       | ENSG00000276176 | 128522389-128522449 | + | -133843 |
| 11 | 128757294 | 128757556 | 263 | 128757368 | 7.09309  | 4.24847 | 2.46969 | ENSG00000151702:intron                                                           | ENSG00000254703 | 128691671-128696023 | - | -61401  |
| 11 | 129739591 | 129739869 | 279 | 129739710 | 4.19696  | 3.36708 | 0.53407 | intergenic                                                                       | ENSG00000255188 | 129788063-129788190 | - | 48460   |
| 11 | 130847539 | 130847808 | 270 | 130847693 | 4.07518  | 3.28858 | 0.47041 | ENSG00000254842:intron                                                           | ENSG00000254842 | 130844190-130865561 | - | 17888   |
| 11 | 132357824 | 132358102 | 279 | 132357894 | 13.90053 | 6.58824 | 8.57994 | intergenic                                                                       | ENSG00000279090 | 132403359-132404060 | - | 46097   |
| 11 | 132510344 | 132510645 | 302 | 132510556 | 3.49438  | 2.91742 | 0.30123 | ENSG00000183715:intron<br>ENSG00000151503:exon;ENS                               | ENSG00000283489 | 132525808-132525887 | + | -15314  |
| 11 | 134157842 | 134158237 | 396 | 134157942 | 4.51692  | 3.44854 | 0.59373 | G00000151503:three_prime<br>IITR                                                 | ENSG00000254616 | 134173094-134173680 | + | -15055  |
| 12 | 25450     | 25676     | 227 | 25563     | 5.39424  | 4.00432 | 1.09512 | ENSG00000226210:intron                                                           | ENSG00000226210 | 14521-32015         | - | 6452    |
| 12 | 6142136   | 6142425   | 290 | 6142262   | 5.39424  | 4.00432 | 1.09512 | intergenic                                                                       | ENSG00000110799 | 5948873-6124770     | - | -17510  |
| 12 | 7806477   | 7806706   | 230 | 7806626   | 4.56295  | 3.60388 | 0.59373 | intergenic                                                                       | ENSG00000199912 | 7800360-7800467     | - | -6124   |
| 12 | 8066355   | 8066670   | 316 | 8066471   | 12.86462 | 6.48314 | 7.62811 | ENSG00000171860:five_pri<br>me_UTR;ENSG00000171860:e<br>xon                      | ENSG00000171860 | 8058301-8066471     | - | -41     |
| 12 | 8648662   | 8648903   | 242 | 8648820   | 5.6497   | 4.01836 | 1.29426 | ENSG00000197614:intron                                                           | ENSG00000197614 | 8637345-8662888     | - | 14106   |
| 12 | 9237304   | 9237621   | 318 | 9237447   | 5.39424  | 4.00432 | 1.09512 | ENSG00000256069:intron                                                           | ENSG00000283429 | 9239466-9239551     | - | 2089    |
| 12 | 9364401   | 9365061   | 661 | 9364510   | 5.6497   | 4.01836 | 1.29426 | intergenic                                                                       | ENSG00000260423 | 9367463-9397617     | + | -2732   |
| 12 | 19498114  | 19498342  | 229 | 19498187  | 4.56295  | 3.60388 | 0.59373 | ENSG00000139154:Promoter                                                         | ENSG00000240328 | 19508903-19509245   | + | -10675  |
| 12 | 19894795  | 19895113  | 319 | 19894945  | 10.09471 | 6.00647 | 5.09428 | ENSG00000255910:intron                                                           | ENSG00000256849 | 19941520-19943018   | + | -46566  |
| 12 | 22118010  | 22118367  | 358 | 22118330  | 3.77589  | 3.20345 | 0.30123 | ENSG00000111728:intron;E<br>NSG00000283582:intron                                | ENSG00000274624 | 22104490-22105320   | - | -12868  |
| 12 | 24172177  | 24172398  | 222 | 24172229  | 8.34229  | 4.44647 | 3.53121 | ENSG00000134532:intron                                                           | ENSG00000216192 | 24212420-24212495   | + | -40133  |
| 12 | 24950546  | 24950774  | 229 | 24950599  | 5.02824  | 3.7712  | 0.90545 | ENSG00000255921:intron;E<br>NSG00000060982:Promoter                              | ENSG00000060982 | 24810021-24949459   | - | -1200   |
| 12 | 25333722  | 25334263  | 542 | 25334105  | 9.10792  | 5.4109  | 4.20447 | intergenic                                                                       | ENSG00000278743 | 25385669-25386241   | - | 52249   |
| 12 | 25811227  | 25811475  | 249 | 25811270  | 3.49438  | 2.91742 | 0.30123 | ENSG00000256686:intron<br>ENSG00000256234:intron;E                               | ENSG00000256686 | 25782705-25814171   | - | 2820    |
| 12 | 26298955  | 26299323  | 369 | 26299157  | 13.05915 | 5.39155 | 7.81101 | NSG00000255750:intron;EN<br>SG00000123096:intron                                 | ENSG00000255858 | 26315714-26317813   | + | -16575  |
| 12 | 27179835  | 27180186  | 352 | 27180020  | 13.8647  | 5.41602 | 8.5517  | intergenic                                                                       | ENSG00000256226 | 27105150-27161393   | - | -18617  |
| 12 | 27530001  | 27530229  | 229 | 27530194  | 5.2587   | 3.91783 | 1.07467 | ENSG00000110841:intron                                                           | ENSG00000110841 | 27523430-27695564   | + | 6684    |
| 12 | 28793725  | 28794096  | 372 | 28793953  | 5.6497   | 4.01836 | 1.29426 | intergenic                                                                       | ENSG00000256513 | 28821974-28825831   | - | 31921   |
| 12 | 28962184  | 28962496  | 313 | 28962402  | 4.56295  | 3.60388 | 0.59373 | intergenic                                                                       | ENSG00000278687 | 28978583-28978685   | + | -16243  |
| 12 | 29496466  | 29496721  | 256 | 29496683  | 4.14216  | 3.33173 | 0.51073 | ENSG00000187950:intron                                                           | ENSG00000187950 | 29412473-29497686   | - | 1093    |
| 12 | 29516425  | 29516684  | 260 | 29516532  | 5.6497   | 4.01836 | 1.29426 | ENSG00000133687:intron                                                           | ENSG00000257456 | 29519730-29529974   | + | -3176   |
| 12 | 29782253  | 29782481  | 229 | 29782301  | 5.74381  | 3.92704 | 1.36222 | ENSG00000133687:intron                                                           | ENSG00000133687 | 29500839-29784759   | - | 2392    |
| 12 | 30138219  | 30138447  | 229 | 30138313  | 3.77589  | 3.20345 | 0.30123 | intergenic                                                                       | ENSG00000276431 | 30169880-30170091   | - | 31758   |

|    |          |          |     |          |          |         |          |                                                                                                          |                 |                   |   |         |
|----|----------|----------|-----|----------|----------|---------|----------|----------------------------------------------------------------------------------------------------------|-----------------|-------------------|---|---------|
| 12 | 30760704 | 30760934 | 231 | 30760843 | 5.2079   | 3.88546 | 1.04111  | ENSG00000246331:intron;E<br>NSG00000235884:intron                                                        | ENSG00000235884 | 30755166-30802602 | + | 5652    |
| 12 | 31024458 | 31024870 | 413 | 31024720 | 3.50566  | 3.02505 | 0.30123  | ENSG00000245614:intron                                                                                   | ENSG00000256984 | 31012502-31015806 | + | 12161   |
| 12 | 32229881 | 32230112 | 232 | 32229962 | 4.84177  | 3.65305 | 0.77787  | ENSG00000258134:Promoter<br>:ENSG00000151746:intron<br>ENSG00000139131:intron;E<br>NSG00000087470:intron | ENSG00000258134 | 32227409-32228154 | - | -1842   |
| 12 | 32734711 | 32734973 | 263 | 32734765 | 5.24168  | 3.90698 | 1.06394  | NSG00000087470:intron                                                                                    | ENSG00000275854 | 32736929-32737660 | - | 2818    |
| 12 | 32906797 | 32907055 | 259 | 32906868 | 10.40026 | 5.97008 | 5.38122  | intergenic                                                                                               | ENSG00000057294 | 32790744-32896840 | - | -10085  |
| 12 | 32906797 | 32907055 | 259 | 32906868 | 10.40026 | 5.97008 | 5.38122  | intergenic                                                                                               | ENSG00000057294 | 32790744-32896840 | - | -10085  |
| 12 | 34497332 | 34497544 | 213 | 34497387 | 4.56295  | 3.60388 | 0.59373  | intergenic                                                                                               | ENSG00000256614 | 34249480-34249958 | + | 247957  |
| 12 | 37294539 | 37294759 | 221 | 37294647 | 3.77589  | 3.20345 | 0.30123  | intergenic                                                                                               | ENSG00000258368 | 37575586-37576384 | + | -280937 |
| 12 | 38543185 | 38543487 | 303 | 38543341 | 9.64493  | 5.73344 | 4.70826  | intergenic                                                                                               | ENSG00000257645 | 38532894-38533050 | - | -10285  |
| 12 | 39752731 | 39753006 | 276 | 39752885 | 8.7445   | 5.0039  | 3.90503  | ENSG00000180116:intron                                                                                   | ENSG00000199571 | 39819749-39819883 | - | 67015   |
| 12 | 40722887 | 40723163 | 277 | 40723006 | 5.39424  | 4.00432 | 1.09512  | ENSG00000018236:intron                                                                                   | ENSG00000257680 | 40728810-40729897 | + | -5785   |
| 12 | 41769898 | 41770184 | 287 | 41770037 | 14.54384 | 6.70083 | 9.16949  | intergenic                                                                                               | ENSG00000257784 | 41764188-41765581 | + | 5852    |
| 12 | 46219696 | 46219912 | 217 | 46219715 | 3.6499   | 2.91341 | 0.30123  | ENSG00000111371:intron                                                                                   | ENSG00000274591 | 46239105-46239473 | + | 19669   |
| 12 | 46360924 | 46361176 | 253 | 46361115 | 4.69706  | 3.56173 | 0.69764  | ENSG00000134294:exon                                                                                     | ENSG00000258096 | 46371462-46373778 | + | -10412  |
| 12 | 46665012 | 46665258 | 247 | 46665165 | 6.26578  | 4.40475 | 1.75945  | ENSG00000257261:intron                                                                                   | ENSG00000271642 | 46682070-46682713 | - | 17578   |
| 12 | 47812896 | 47813200 | 305 | 47813058 | 15.47791 | 5.45626 | 10.04498 | ENSG00000061273:intron                                                                                   | ENSG00000274737 | 47817450-47817966 | - | 4918    |
| 12 | 50833992 | 50834215 | 224 | 50834157 | 6.49439  | 4.38367 | 1.95029  | intergenic                                                                                               | ENSG00000243075 | 50841497-50841785 | - | 7682    |
| 12 | 51189323 | 51189585 | 263 | 51189439 | 6.82552  | 4.41829 | 2.2309   | ENSG00000184271:exon;ENS<br>G00000184271:three_prime<br>ITR                                              | ENSG00000278126 | 51201683-51202581 | - | 13127   |
| 12 | 51301988 | 51302346 | 359 | 51302247 | 3.23881  | 2.84938 | 0.2852   | ENSG00000110934:intron                                                                                   | ENSG00000110934 | 51281037-51324668 | - | 22501   |
| 12 | 53518731 | 53519024 | 294 | 53518992 | 3.32816  | 2.90812 | 0.30123  | ENSG00000170653:intron;E<br>NSG00000267281:intron                                                        | ENSG00000257550 | 53513983-53517608 | + | 4894    |
| 12 | 56338672 | 56338905 | 234 | 56338831 | 7.17593  | 4.45747 | 2.52803  | ENSG00000110944:intron                                                                                   | ENSG00000110944 | 56334173-56340410 | + | 4615    |
| 12 | 56443397 | 56443725 | 329 | 56443514 | 4.1849   | 3.24157 | 0.52478  | ENSG00000111602:intron                                                                                   | ENSG00000111602 | 56416372-56449403 | - | 5842    |
| 12 | 56713512 | 56713728 | 217 | 56713607 | 5.66875  | 3.88202 | 1.31047  | ENSG00000196531:exon                                                                                     | ENSG00000196531 | 56712427-56731628 | - | 18008   |
| 12 | 56818892 | 56819116 | 225 | 56819038 | 4.14216  | 3.33173 | 0.51073  | intergenic                                                                                               | ENSG00000258679 | 56822984-56874268 | + | -3980   |
| 12 | 57631869 | 57632075 | 207 | 57631960 | 4.69815  | 3.31233 | 0.69764  | ENSG00000135454:exon                                                                                     | ENSG00000135454 | 57623409-57633355 | - | 1383    |
| 12 | 58425543 | 58425792 | 250 | 58425627 | 7.3115   | 4.37011 | 2.6406   | intergenic                                                                                               | ENSG00000258133 | 58394595-58395138 | + | 31072   |
| 12 | 59787269 | 59787536 | 268 | 59787337 | 7.17425  | 4.80518 | 2.52654  | intergenic                                                                                               | ENSG00000237176 | 59812101-59812576 | + | -24699  |
| 12 | 63024766 | 63025350 | 585 | 63025212 | 4.56295  | 3.60388 | 0.59373  | intergenic                                                                                               | ENSG00000257235 | 63004337-63006541 | - | -18516  |
| 12 | 64088442 | 64088722 | 281 | 64088579 | 7.17425  | 4.80518 | 2.52654  | ENSG00000196935:intron;E<br>NSG00000255886:intron                                                        | ENSG00000255886 | 64038561-64097618 | - | 9036    |
| 12 | 65355593 | 65355805 | 213 | 65355738 | 5.6497   | 4.01836 | 1.29426  | ENSG00000174099:intron                                                                                   | ENSG00000215208 | 65418730-65420027 | - | 64328   |
| 12 | 65440176 | 65440436 | 261 | 65440265 | 4.56295  | 3.60388 | 0.59373  | ENSG00000174099:intron                                                                                   | ENSG00000215208 | 65418730-65420027 | + | -20278  |
| 12 | 66453356 | 66453632 | 277 | 66453479 | 4.44284  | 3.52605 | 0.59373  | intergenic                                                                                               | ENSG00000256285 | 66563523-66563694 | + | -110029 |
| 12 | 66508095 | 66508311 | 217 | 66508284 | 3.77589  | 3.20345 | 0.30123  | intergenic                                                                                               | ENSG00000256285 | 66563523-66563694 | + | -55320  |
| 12 | 66697576 | 66697825 | 250 | 66697683 | 4.76929  | 3.60726 | 0.74587  | ENSG00000155974:intron                                                                                   | ENSG00000256420 | 66563966-66569194 | - | -128506 |
| 12 | 67449490 | 67449796 | 307 | 67449649 | 13.59613 | 6.89707 | 8.29827  | ENSG00000203585:intron                                                                                   | ENSG00000203585 | 67443104-67590771 | + | 6538    |
| 12 | 67450265 | 67450477 | 213 | 67450321 | 4.11506  | 3.19834 | 0.49781  | ENSG00000203585:intron                                                                                   | ENSG00000203585 | 67443104-67590771 | + | 7266    |
| 12 | 71174017 | 71174256 | 240 | 71174154 | 5.24168  | 3.90698 | 1.06394  | ENSG00000127324:intron                                                                                   | ENSG00000258053 | 71047401-71118247 | - | -55889  |
| 12 | 71195485 | 71195835 | 351 | 71195660 | 5.6497   | 4.01836 | 1.29426  | ENSG00000127324:intron                                                                                   | ENSG00000258053 | 71047401-71118247 | - | -77412  |
| 12 | 71174017 | 71174256 | 240 | 71174154 | 5.24168  | 3.90698 | 1.06394  | ENSG00000127324:intron                                                                                   | ENSG00000258053 | 71047401-71118247 | - | -55889  |
| 12 | 71195485 | 71195835 | 351 | 71195660 | 5.6497   | 4.01836 | 1.29426  | ENSG00000127324:intron                                                                                   | ENSG00000258053 | 71047401-71118247 | - | -77412  |
| 12 | 73498762 | 73498983 | 222 | 73498860 | 7.17425  | 4.80518 | 2.52654  | intergenic                                                                                               | ENSG00000243164 | 73648665-73649039 | + | -149793 |
| 12 | 75944244 | 75944865 | 622 | 75944385 | 6.58155  | 3.96836 | 2.01637  | ENSG00000258077:intron                                                                                   | ENSG00000243420 | 75957832-75958130 | - | 13576   |
| 12 | 75977907 | 75978231 | 325 | 75978038 | 14.29237 | 6.34938 | 8.94032  | ENSG00000258077:intron                                                                                   | ENSG00000258077 | 75563201-75984015 | - | 5946    |
| 12 | 76669380 | 76669820 | 441 | 76669438 | 4.56295  | 3.60388 | 0.59373  | intergenic                                                                                               | ENSG00000243071 | 76660404-76660884 | + | 9195    |

|    |           |           |     |           |           |          |           |                                                     |                 |                     |   |        |
|----|-----------|-----------|-----|-----------|-----------|----------|-----------|-----------------------------------------------------|-----------------|---------------------|---|--------|
| 12 | 76836952  | 76837272  | 321 | 76837139  | 4. 56295  | 3. 60388 | 0. 59373  | ENSG00000186908:intron                              | ENSG00000257910 | 76878192-76880352   | + | -41080 |
| 12 | 77002305  | 77002608  | 304 | 77002574  | 6. 26578  | 4. 40475 | 1. 75945  | intergenic                                          | ENSG00000257199 | 76984078-76984669   | - | -17787 |
| 12 | 78515542  | 78515867  | 326 | 78515679  | 5. 39424  | 4. 00432 | 1. 09512  | ENSG00000257165:intron                              | ENSG00000257165 | 78448994-78540675   | - | 24971  |
| 12 | 79561490  | 79561853  | 364 | 79561785  | 5. 25679  | 3. 77493 | 1. 07467  | intergenic                                          | ENSG00000257956 | 79558781-79559166   | + | 2890   |
| 12 | 81582907  | 81583203  | 297 | 81582994  | 6. 26578  | 4. 40475 | 1. 75945  | ENSG00000139220:intron                              | ENSG00000258375 | 81545325-81546450   | + | -36604 |
| 12 | 82843830  | 82844055  | 226 | 82843908  | 5. 56876  | 3. 96799 | 1. 238    | ENSG00000179104:intron                              | ENSG00000179104 | 82686879-83134870   | - | 157063 |
| 12 | 84058180  | 84058396  | 217 | 84058201  | 3. 77589  | 3. 20345 | 0. 30123  | intergenic                                          | ENSG00000285191 | 84147303-84154338   | - | 96050  |
| 12 | 85518681  | 85518949  | 269 | 85518869  | 4. 53506  | 3. 5858  | 0. 59373  | intergenic                                          | ENSG00000257855 | 85567877-85568239   | + | -49062 |
| 12 | 88960295  | 88960798  | 504 | 88960471  | 6. 49439  | 4. 38367 | 1. 95029  | intergenic                                          | ENSG00000246363 | 89010680-89019679   | - | 59133  |
| 12 | 89469373  | 89469632  | 260 | 89469503  | 8. 65039  | 5. 33675 | 3. 81818  | ENSG00000139323:intron                              | ENSG00000226982 | 89500092-89502670   | + | -30590 |
| 12 | 89661064  | 89661285  | 222 | 89661274  | 3. 18471  | 2. 81386 | 0. 2494   | ENSG00000070961:intron                              | ENSG00000271614 | 89708958-89712590   | + | -47784 |
| 12 | 90930706  | 90931024  | 319 | 90930891  | 5. 39424  | 4. 00432 | 1. 09512  | ENSG00000196243:intron;E<br>NSG00000197651:intron   | ENSG00000196243 | 90918022-90948669   | + | 12842  |
| 12 | 91007868  | 91008108  | 241 | 91008064  | 4. 84177  | 3. 65305 | 0. 77787  | intergenic                                          | ENSG00000083782 | 90963678-91005026   | - | -2961  |
| 12 | 91023474  | 91023903  | 430 | 91023583  | 5. 39424  | 4. 00432 | 1. 09512  | intergenic                                          | ENSG00000083782 | 90963678-91005026   | - | -18662 |
| 12 | 91007868  | 91008108  | 241 | 91008064  | 4. 84177  | 3. 65305 | 0. 77787  | intergenic                                          | ENSG00000083782 | 90963678-91005026   | - | -2961  |
| 12 | 91023474  | 91023903  | 430 | 91023583  | 5. 39424  | 4. 00432 | 1. 09512  | intergenic                                          | ENSG00000083782 | 90963678-91005026   | - | -18662 |
| 12 | 91778937  | 91779277  | 341 | 91779158  | 12. 43382 | 5. 82026 | 7. 22732  | intergenic                                          | ENSG00000258224 | 91871121-91871230   | - | 92123  |
| 12 | 92055993  | 92056284  | 292 | 92056131  | 7. 47727  | 4. 8125  | 2. 77843  | ENSG00000257242:intron                              | ENSG00000257242 | 91984975-92142914   | - | 86776  |
| 12 | 92539248  | 92539567  | 320 | 92539414  | 13. 43669 | 6. 56761 | 8. 1476   | intergenic                                          | ENSG00000258262 | 92530459-92531324   | + | 8948   |
| 12 | 93759440  | 93759665  | 226 | 93759583  | 5. 87556  | 4. 15944 | 1. 46959  | ENSG00000169372:intron                              | ENSG00000258274 | 93707790-93737823   | - | -21729 |
| 12 | 93948870  | 93949108  | 239 | 93949047  | 4. 56295  | 3. 60388 | 0. 59373  | intergenic                                          | ENSG00000271382 | 93945040-93947813   | + | 3948   |
| 12 | 94561001  | 94561235  | 235 | 94561090  | 8. 17399  | 4. 36112 | 3. 38452  | ENSG00000266099:Promoter                            | ENSG00000266099 | 94561788-94561859   | + | -670   |
| 12 | 94640569  | 94640865  | 297 | 94640739  | 11. 04042 | 5. 90426 | 5. 95914  | ENSG00000057704:intron                              | ENSG00000057704 | 94567123-94650562   | - | 9845   |
| 12 | 95700507  | 95700740  | 234 | 95700574  | 4. 76422  | 3. 12858 | 0. 74587  | ENSG00000074527:intron                              | ENSG00000212448 | 95617688-95617786   | + | 82935  |
| 12 | 96195626  | 96195897  | 272 | 96195741  | 15. 35374 | 6. 89446 | 9. 92645  | ENSG00000111145:intron                              | ENSG00000111145 | 96194381-96269835   | + | 1380   |
| 12 | 96502551  | 96502910  | 360 | 96502771  | 16. 55362 | 7. 28351 | 11. 05902 | ENSG00000188596:intron                              | ENSG00000188596 | 96489570-96875555   | + | 13160  |
| 12 | 98028953  | 98029226  | 274 | 98029071  | 7. 17425  | 4. 80518 | 2. 52654  | intergenic                                          | ENSG00000263890 | 97995382-97995448   | - | -33641 |
| 12 | 98147058  | 98147306  | 249 | 98147089  | 3. 77589  | 3. 20345 | 0. 30123  | ENSG00000258312:intron                              | ENSG00000258312 | 98113013-98292445   | - | 145263 |
| 12 | 98153620  | 98153939  | 320 | 98153711  | 3. 77589  | 3. 20345 | 0. 30123  | ENSG00000258312:intron                              | ENSG00000258312 | 98113013-98292445   | - | 138666 |
| 12 | 98249311  | 98249575  | 265 | 98249544  | 3. 03786  | 2. 80302 | 0. 15111  | ENSG00000258312:intron                              | ENSG00000258312 | 98113013-98292445   | - | 43002  |
| 12 | 98274900  | 98275139  | 240 | 98275012  | 5. 70747  | 3. 2883  | 1. 33527  | ENSG00000258312:intron                              | ENSG00000258312 | 98113013-98292445   | - | 17426  |
| 12 | 99624741  | 99624947  | 207 | 99624878  | 6. 26578  | 4. 40475 | 1. 75945  | ENSG00000185046:intron                              | ENSG00000180219 | 99647752-99650046   | + | -22908 |
| 12 | 99628357  | 99628602  | 246 | 99628506  | 5. 39424  | 4. 00432 | 1. 09512  | ENSG00000185046:intron                              | ENSG00000180219 | 99647752-99650046   | + | -19273 |
| 12 | 101201457 | 101201753 | 297 | 101201602 | 6. 22868  | 4. 22079 | 1. 75945  | ENSG00000256870:intron                              | ENSG00000207414 | 101199270-101199377 | - | -2227  |
| 12 | 101309178 | 101309487 | 310 | 101309257 | 3. 98411  | 3. 23002 | 0. 45207  | ENSG00000120800:intron                              | ENSG00000120800 | 101280108-101386616 | + | 29224  |
| 12 | 102465376 | 102465640 | 265 | 102465417 | 5. 39424  | 4. 00432 | 1. 09512  | ENSG00000017427:intron                              | ENSG00000017427 | 102395873-102481744 | - | 16236  |
| 12 | 102474456 | 102475036 | 581 | 102474515 | 4. 38813  | 3. 49062 | 0. 92326  | ENSG00000017427:intron                              | ENSG00000017427 | 102395873-102481744 | - | 6998   |
| 12 | 103505362 | 103505643 | 282 | 103505485 | 14. 14747 | 7. 21453 | 8. 80937  | ENSG00000257994:exon                                | ENSG00000257994 | 103505410-103506174 | - | 672    |
| 12 | 105648762 | 105648980 | 219 | 105648905 | 5. 68188  | 3. 88989 | 1. 31322  | intergenic                                          | ENSG00000257859 | 105704202-105744062 | + | -55331 |
| 12 | 106557063 | 106557314 | 252 | 106557109 | 4. 56295  | 3. 60388 | 0. 59373  | ENSG00000257545:intron                              | ENSG00000111783 | 106582906-106762803 | + | -25718 |
| 12 | 106561067 | 106561283 | 217 | 106561082 | 4. 15576  | 3. 3405  | 0. 52015  | ENSG00000257545:intron                              | ENSG00000111783 | 106582906-106762803 | + | -21731 |
| 12 | 107558966 | 107559372 | 407 | 107559232 | 5. 39424  | 4. 00432 | 1. 09512  | ENSG00000151136:intron                              | ENSG00000257579 | 107610033-107617721 | - | 58552  |
| 12 | 107616712 | 107617040 | 329 | 107616953 | 4. 50398  | 3. 56566 | 0. 59373  | ENSG00000151136:intron;E<br>NSG00000257579:intron   | ENSG00000257579 | 107610033-107617721 | - | 845    |
| 12 | 108568909 | 108569157 | 249 | 108568984 | 6. 58155  | 3. 96836 | 2. 01637  | G00000136003:three_prime<br>UTR                     | ENSG00000136003 | 108562581-108569384 | + | 6451   |
| 12 | 108617422 | 108617639 | 218 | 108617546 | 6. 58155  | 3. 96836 | 2. 01637  | intergenic                                          | ENSG00000257221 | 108628686-108641318 | + | -11156 |
| 12 | 108838438 | 108838706 | 269 | 108838619 | 10. 01593 | 5. 14387 | 5. 02923  | ENSG00000207622:Promoter<br>:ENSG00000084112:intron | ENSG00000207622 | 108836907-108837006 | - | -1565  |

|    |           |           |     |           |          |         |          |                                                      |                 |                     |   |         |
|----|-----------|-----------|-----|-----------|----------|---------|----------|------------------------------------------------------|-----------------|---------------------|---|---------|
| 12 | 109040438 | 109040757 | 320 | 109040608 | 5.39424  | 4.00432 | 1.09512  | ENSG00000135093:intron<br>ENSG00000139410:exon;ENS   | ENSG00000256262 | 109052349-109053952 | - | 13355   |
| 12 | 113422160 | 113422400 | 241 | 113422255 | 9.09099  | 5.60604 | 4.18865  | G00000135094:intron;ENSG<br>00000139410:five_prime_U | ENSG00000139410 | 113422236-113438276 | + | 43      |
| 12 | 124390893 | 124391122 | 230 | 124390914 | 3.49438  | 2.91742 | 0.30123  | ENSG00000196498:intron                               | ENSG00000255965 | 124383380-124383510 | + | 7627    |
| 12 | 124453411 | 124453836 | 426 | 124453677 | 7.17425  | 4.80518 | 2.52654  | ENSG00000196498:intron                               | ENSG00000214650 | 124513221-124514813 | + | -59598  |
| 12 | 126772353 | 126772672 | 320 | 126772519 | 13.26553 | 7.20777 | 7.98923  | ENSG00000256128:Promoter                             | ENSG00000256128 | 126729786-126772411 | - | -101    |
| 13 | 27131181  | 27131504  | 324 | 27131326  | 13.26553 | 7.20777 | 7.98923  | ENSG00000152484:intron                               | ENSG00000232162 | 27162854-27169135   | + | -31512  |
| 13 | 41019242  | 41019491  | 250 | 41019347  | 4.56295  | 3.60388 | 0.59373  | ENSG00000120690:Promoter                             | ENSG00000229473 | 40992778-40993331   | - | -26035  |
| 13 | 47950065  | 47950501  | 437 | 47950413  | 4.56295  | 3.60388 | 0.59373  | ENSG00000136143:intron                               | ENSG00000260388 | 47930152-47932622   | - | -17660  |
| 13 | 50511072  | 50511360  | 289 | 50511222  | 5.39424  | 4.00432 | 1.09512  | ENSG00000176124:intron<br>ENSG00000283208:intron;E   | ENSG00000229323 | 50520932-50527449   | - | 16233   |
| 13 | 77000480  | 77000765  | 286 | 77000657  | 3.49438  | 2.91742 | 0.30123  | NSG00000005812:intron;EN<br>SG00000102805:intron     | ENSG00000283208 | 76992077-77129589   | + | 8545    |
| 13 | 79338708  | 79338917  | 210 | 79338861  | 3.77589  | 3.20345 | 0.30123  | ENSG00000139746:intron                               | ENSG00000252496 | 79389533-79389631   | - | 50819   |
| 13 | 79385848  | 79386079  | 232 | 79385997  | 7.17425  | 4.80518 | 2.52654  | ENSG00000139746:intron                               | ENSG00000252496 | 79389533-79389631   | - | 3668    |
| 13 | 80318178  | 80318420  | 243 | 80318379  | 4.84177  | 3.65305 | 0.77787  | intergenic                                           | ENSG00000136158 | 80335975-80340951   | - | 22652   |
| 13 | 82620080  | 82620345  | 266 | 82620310  | 4.56295  | 3.60388 | 0.59373  | intergenic                                           | ENSG00000237099 | 82823130-82824136   | + | -202918 |
| 13 | 84199127  | 84199455  | 329 | 84199347  | 3.34993  | 2.92244 | 0.30123  | intergenic                                           | ENSG00000285742 | 84063105-84069408   | + | 136185  |
| 13 | 94171610  | 94171814  | 205 | 94171739  | 3.77589  | 3.20345 | 0.30123  | ENSG00000183098:intron;E<br>NSG00000236520:intron    | ENSG00000236520 | 94154192-94187991   | - | 16279   |
| 13 | 94213554  | 94213860  | 307 | 94213607  | 4.50398  | 3.56566 | 0.59373  | ENSG00000183098:intron                               | ENSG00000236520 | 94154192-94187991   | - | -25715  |
| 13 | 95749664  | 95749887  | 224 | 95749761  | 3.02441  | 2.62206 | 0.15111  | ENSG00000102580:intron                               | ENSG00000276809 | 95744725-95745765   | + | 5050    |
| 13 | 97318106  | 97318346  | 241 | 97318227  | 4.91514  | 3.56573 | 0.82412  | ENSG00000139793:intron                               | ENSG00000202290 | 97362971-97363101   | - | 44875   |
| 13 | 99151607  | 99151910  | 304 | 99151743  | 7.86641  | 5.0511  | 3.13611  | intergenic                                           | ENSG00000230871 | 99173592-99174490   | + | -21834  |
| 13 | 99375109  | 99375392  | 284 | 99375283  | 4.76929  | 3.60726 | 0.74587  | ENSG00000134882:intron                               | ENSG00000228808 | 99372172-99372686   | + | 3078    |
| 13 | 109156759 | 109157009 | 251 | 109156987 | 4.07388  | 3.28775 | 0.47041  | ENSG00000041515:intron                               | ENSG00000236242 | 109163901-109201483 | - | 44599   |
| 13 | 109162257 | 109162494 | 238 | 109162452 | 5.74381  | 3.92704 | 1.36222  | ENSG00000041515:intron                               | ENSG00000236242 | 109163901-109201483 | - | 39108   |
| 13 | 112376158 | 112376374 | 217 | 112376290 | 5.68492  | 4.04031 | 1.31535  | ENSG00000153498:Promoter                             | ENSG00000153498 | 112376318-112434689 | + | -52     |
| 13 | 112562420 | 112562659 | 240 | 112562453 | 3.73797  | 3.1784  | 0.30123  | ENSG00000126216:intron                               | ENSG00000126216 | 112485004-112588205 | - | 25666   |
| 13 | 113647873 | 113648092 | 220 | 113647984 | 3.76336  | 3.08858 | 0.30123  | intergenic                                           | ENSG00000186009 | 113648803-113658186 | - | 10204   |
| 14 | 22464394  | 22464670  | 277 | 22464519  | 11.1261  | 6.40691 | 6.0347   | ENSG00000211829:intron;E<br>NSG00000251002:intron    | ENSG00000211829 | 22462931-22465787   | + | 1600    |
| 14 | 57060574  | 57060817  | 244 | 57060703  | 8.17554  | 4.86236 | 3.38452  | ENSG00000248550:intron                               | ENSG00000259136 | 57044645-57044960   | - | -15735  |
| 14 | 68210806  | 68211045  | 240 | 68210902  | 7.17425  | 4.80518 | 2.52654  | ENSG00000182185:intron                               | ENSG00000243546 | 68236242-68236539   | - | 25614   |
| 14 | 95265535  | 95265786  | 252 | 95265647  | 12.86462 | 6.48314 | 7.62811  | ENSG00000165959:intron                               | ENSG00000165959 | 95181939-95319906   | - | 54246   |
| 14 | 105582051 | 105582303 | 253 | 105582176 | 8.99866  | 4.4694  | 4.12107  | intergenic                                           | ENSG00000211890 | 105583730-105588395 | - | 6218    |
| 15 | 20353342  | 20353666  | 325 | 20353513  | 17.93691 | 5.26834 | 12.38107 | ENSG00000258654:intron                               | ENSG00000258654 | 20344735-20359166   | + | 8768    |
| 15 | 20421765  | 20422045  | 281 | 20421897  | 3.58279  | 2.53746 | 0.30123  | ENSG00000180229:intron                               | ENSG00000258654 | 20344735-20359166   | + | 77169   |
| 15 | 20353342  | 20353666  | 325 | 20353513  | 17.93691 | 5.26834 | 12.38107 | ENSG00000258654:intron                               | ENSG00000258654 | 20344735-20359166   | + | 8768    |
| 15 | 20421765  | 20422045  | 281 | 20421897  | 3.58279  | 2.53746 | 0.30123  | ENSG00000180229:intron                               | ENSG00000258654 | 20344735-20359166   | + | 77169   |
| 15 | 23423172  | 23423565  | 394 | 23423383  | 12.79845 | 6.68291 | 7.56866  | intergenic                                           | ENSG00000261418 | 23430838-23435212   | + | -7470   |
| 15 | 24594695  | 24594948  | 254 | 24594876  | 4.56295  | 3.60388 | 0.59373  | ENSG00000259905:intron                               | ENSG00000185823 | 24675867-24683393   | + | -81046  |
| 15 | 25071226  | 25071569  | 344 | 25071485  | 4.56295  | 3.60388 | 0.59373  | ENSG00000206727:Promoter<br>ENSG00000259168:intron;E | ENSG00000207093 | 25070431-25070526   | + | 966     |
| 15 | 27518565  | 27518895  | 331 | 27518622  | 5.39424  | 4.00432 | 1.09512  | NSG00000182256:intron                                | ENSG00000259168 | 27483034-27541991   | - | 23261   |
| 15 | 27554111  | 27554326  | 216 | 27554135  | 4.56295  | 3.60388 | 0.59373  | intergenic                                           | ENSG00000259168 | 27483034-27541991   | - | -12227  |
| 15 | 28219380  | 28219603  | 224 | 28219474  | 4.56295  | 3.60388 | 0.59373  | ENSG00000128731:intron                               | ENSG00000256338 | 28315650-28316059   | + | -96159  |
| 15 | 29709818  | 29710052  | 235 | 29709945  | 5.73591  | 4.07212 | 1.35894  | intergenic                                           | ENSG00000259644 | 29728185-29729531   | - | 19596   |

|    |          |          |     |          |          |         |         |                                                     |                 |                   |   |         |
|----|----------|----------|-----|----------|----------|---------|---------|-----------------------------------------------------|-----------------|-------------------|---|---------|
| 15 | 29821404 | 29821668 | 265 | 29821535 | 12.43382 | 5.82026 | 7.22732 | ENSG00000259523:Promoter<br>:ENSG00000104067:intron | ENSG00000259523 | 29822630-29824081 | + | -1094   |
| 15 | 32839510 | 32839740 | 231 | 32839709 | 4.58495  | 3.49121 | 0.61075 | ENSG00000248905:intron                              | ENSG00000259392 | 32836982-32837326 | - | -2298   |
| 15 | 32872569 | 32872773 | 205 | 32872624 | 4.91514  | 3.56573 | 0.82412 | ENSG00000248905:intron                              | ENSG00000259392 | 32836982-32837326 | - | -35344  |
| 15 | 34254888 | 34255110 | 223 | 34254994 | 4.31475  | 3.20475 | 0.59373 | ENSG00000259468:Promoter<br>:ENSG00000140199:intron | ENSG00000259468 | 34255285-34257832 | + | -286    |
| 15 | 37912985 | 37913300 | 316 | 37913256 | 3.76522  | 3.1964  | 0.30123 | intergenic                                          | ENSG00000166069 | 37921938-37967724 | + | -8796   |
| 15 | 38069091 | 38069372 | 282 | 38069186 | 11.10484 | 6.16387 | 6.01942 | intergenic                                          | ENSG00000236914 | 38069480-38072959 | - | 3728    |
| 15 | 38084476 | 38084861 | 386 | 38084622 | 5.73591  | 4.07212 | 1.35894 | intergenic                                          | ENSG00000236914 | 38069480-38072959 | - | -11709  |
| 15 | 38086064 | 38086272 | 209 | 38086111 | 3.6499   | 2.91341 | 0.30123 | intergenic                                          | ENSG00000236914 | 38069480-38072959 | - | -13208  |
| 15 | 38069091 | 38069372 | 282 | 38069186 | 11.10484 | 6.16387 | 6.01942 | intergenic                                          | ENSG00000236914 | 38069480-38072959 | - | 3728    |
| 15 | 38084476 | 38084861 | 386 | 38084622 | 5.73591  | 4.07212 | 1.35894 | intergenic                                          | ENSG00000236914 | 38069480-38072959 | - | -11709  |
| 15 | 38086064 | 38086272 | 209 | 38086111 | 3.6499   | 2.91341 | 0.30123 | intergenic                                          | ENSG00000236914 | 38069480-38072959 | - | -13208  |
| 15 | 40098772 | 40099030 | 259 | 40098869 | 10.76909 | 4.43321 | 5.71076 | ENSG00000104081:intron                              | ENSG00000104081 | 40087889-40108892 | - | 9991    |
| 15 | 43440754 | 43441096 | 343 | 43440955 | 9.06429  | 5.18652 | 4.17525 | ENSG00000067369:intron                              | ENSG00000243871 | 43391383-43391727 | - | -49197  |
| 15 | 43649253 | 43649495 | 243 | 43649414 | 5.68188  | 3.88989 | 1.31322 | ENSG00000166762:intron                              | ENSG00000224677 | 43649122-43649280 | + | 251     |
| 15 | 43948685 | 43949201 | 517 | 43948805 | 5.75051  | 3.78743 | 1.36222 | ENSG00000171877:intron                              | ENSG00000185607 | 43989060-43990184 | - | 41241   |
| 15 | 44308436 | 44308659 | 224 | 44308566 | 5.26629  | 3.39198 | 1.07888 | ENSG00000166734:intron                              | ENSG00000166734 | 44288728-44415758 | + | 19819   |
| 15 | 44726719 | 44726951 | 233 | 44726809 | 11.66864 | 5.82681 | 6.52722 | intergenic                                          | ENSG00000185880 | 44728987-44767829 | + | -2152   |
| 15 | 45061380 | 45061620 | 241 | 45061578 | 3.49438  | 2.91742 | 0.30123 | ENSG00000140263:intron                              | ENSG00000259418 | 45041715-45058707 | - | -2792   |
| 15 | 47841294 | 47841524 | 231 | 47841369 | 4.76929  | 3.60726 | 0.74587 | ENSG00000259572:intron                              | ENSG00000259572 | 47803383-47846236 | - | 4827    |
| 15 | 49133974 | 49134221 | 248 | 49134178 | 3.77589  | 3.20345 | 0.30123 | ENSG00000166200:intron                              | ENSG00000200120 | 49137761-49137863 | - | 3766    |
| 15 | 51058661 | 51058876 | 216 | 51058734 | 4.29558  | 3.43077 | 0.59373 | ENSG00000259240:intron;E<br>NSG00000183578:intron   | ENSG00000259204 | 51064608-51069586 | - | 10818   |
| 15 | 51243862 | 51244107 | 246 | 51243954 | 8.23437  | 4.24593 | 3.43385 | ENSG00000259240:intron;E<br>NSG00000137869:intron   | ENSG00000266593 | 51242189-51242264 | + | 1795    |
| 15 | 52006397 | 52006793 | 397 | 52006674 | 4.08844  | 3.29712 | 0.48089 | ENSG00000069956:intron                              | ENSG00000274528 | 52017166-52018032 | - | 11437   |
| 15 | 52021186 | 52021418 | 233 | 52021314 | 4.45692  | 3.17469 | 0.59373 | ENSG00000069956:intron                              | ENSG00000259438 | 52010998-52019095 | - | -2206   |
| 15 | 53504304 | 53504588 | 285 | 53504462 | 5.39424  | 4.00432 | 1.09512 | intergenic                                          | ENSG00000252066 | 53651976-53652123 | + | -147530 |
| 15 | 55279739 | 55280027 | 289 | 55279881 | 9.72009  | 5.17084 | 4.77897 | ENSG00000069974:intron                              | ENSG00000276533 | 55288848-55289346 | - | 9463    |
| 15 | 55279739 | 55280027 | 289 | 55279881 | 9.72009  | 5.17084 | 4.77897 | ENSG00000069974:intron                              | ENSG00000276533 | 55288848-55289346 | - | 9463    |
| 15 | 56371821 | 56372059 | 239 | 56371938 | 8.17554  | 4.86236 | 3.38452 | ENSG00000151575:intron                              | ENSG00000259941 | 56394320-56396785 | - | 24845   |
| 15 | 56393640 | 56393853 | 214 | 56393700 | 3.77589  | 3.20345 | 0.30123 | intergenic                                          | ENSG00000259941 | 56394320-56396785 | + | 3039    |
| 15 | 58332205 | 58332445 | 241 | 58332341 | 8.28323  | 5.11428 | 3.47693 | ENSG00000128918:intron                              | ENSG00000166035 | 58410568-58569843 | + | -78243  |
| 15 | 58673775 | 58674142 | 368 | 58673813 | 6.26578  | 4.40475 | 1.75945 | ENSG00000137845:intron                              | ENSG00000270986 | 58672295-58672933 | + | 1663    |
| 15 | 59052285 | 59052512 | 228 | 59052454 | 6.78327  | 4.56203 | 2.19117 | intergenic                                          | ENSG00000241640 | 59049398-59050385 | - | -2013   |
| 15 | 60255505 | 60255733 | 229 | 60255654 | 6.51641  | 4.07877 | 1.96373 | intergenic                                          | ENSG00000240163 | 60390370-60390682 | + | -134751 |
| 15 | 60660540 | 60660830 | 291 | 60660669 | 5.27581  | 3.92874 | 1.08581 | ENSG00000069667:intron                              | ENSG00000277413 | 60677108-60677272 | - | 16587   |
| 15 | 63430497 | 63430762 | 266 | 63430627 | 5.53627  | 3.9478  | 1.2149  | ENSG00000259459:intron                              | ENSG00000259268 | 63456293-63469351 | - | 38722   |
| 15 | 66415534 | 66415810 | 277 | 66415648 | 3.53038  | 3.04135 | 0.30123 | ENSG00000169032:intron;E<br>NSG00000261102:Promoter | ENSG00000261102 | 66414932-66415198 | - | -473    |
| 15 | 67077275 | 67077485 | 211 | 67077399 | 4.10177  | 3.30571 | 0.49129 | ENSG00000166949:intron                              | ENSG00000259347 | 66984107-67065268 | - | -12111  |
| 15 | 67091269 | 67091529 | 261 | 67091427 | 8.99866  | 4.4694  | 4.12107 | ENSG00000166949:intron                              | ENSG00000259347 | 66984107-67065268 | - | -26130  |
| 15 | 69241305 | 69241577 | 273 | 69241348 | 4.07388  | 3.28775 | 0.47041 | ENSG00000138604:intron                              | ENSG00000259504 | 69278674-69295322 | + | -37233  |
| 15 | 69714255 | 69714526 | 272 | 69714381 | 9.6365   | 5.31664 | 4.70027 | intergenic                                          | ENSG00000259496 | 69803315-69804046 | - | 89656   |
| 15 | 69727205 | 69727503 | 299 | 69727235 | 3.81246  | 2.91013 | 0.32594 | intergenic                                          | ENSG00000259496 | 69803315-69804046 | - | 76692   |
| 15 | 69755638 | 69755919 | 282 | 69755790 | 9.27287  | 5.50951 | 4.35502 | intergenic                                          | ENSG00000259496 | 69803315-69804046 | - | 48268   |
| 15 | 69761036 | 69761269 | 234 | 69761113 | 8.9436   | 5.11735 | 4.08953 | intergenic                                          | ENSG00000259496 | 69803315-69804046 | - | 42894   |
| 15 | 69714255 | 69714526 | 272 | 69714381 | 9.6365   | 5.31664 | 4.70027 | intergenic                                          | ENSG00000259496 | 69803315-69804046 | - | 89656   |
| 15 | 69727205 | 69727503 | 299 | 69727235 | 3.81246  | 2.91013 | 0.32594 | intergenic                                          | ENSG00000259496 | 69803315-69804046 | - | 76692   |
| 15 | 69755638 | 69755919 | 282 | 69755790 | 9.27287  | 5.50951 | 4.35502 | intergenic                                          | ENSG00000259496 | 69803315-69804046 | - | 48268   |



|    |          |          |     |          |           |          |          |                          |                 |                   |   |        |
|----|----------|----------|-----|----------|-----------|----------|----------|--------------------------|-----------------|-------------------|---|--------|
| 15 | 69761036 | 69761269 | 234 | 69761113 | 8. 9436   | 5. 11735 | 4. 08953 | intergenic               | ENSG00000259496 | 69803315-69804046 | - | 42894  |
| 15 | 69714255 | 69714526 | 272 | 69714381 | 9. 6365   | 5. 31664 | 4. 70027 | intergenic               | ENSG00000259496 | 69803315-69804046 | - | 89656  |
| 15 | 69727205 | 69727503 | 299 | 69727235 | 3. 81246  | 2. 91013 | 0. 32594 | intergenic               | ENSG00000259496 | 69803315-69804046 | - | 76692  |
| 15 | 69755638 | 69755919 | 282 | 69755790 | 9. 27287  | 5. 50951 | 4. 35502 | intergenic               | ENSG00000259496 | 69803315-69804046 | - | 48268  |
| 15 | 69761036 | 69761269 | 234 | 69761113 | 8. 9436   | 5. 11735 | 4. 08953 | intergenic               | ENSG00000259496 | 69803315-69804046 | - | 42894  |
| 15 | 69714255 | 69714526 | 272 | 69714381 | 9. 6365   | 5. 31664 | 4. 70027 | intergenic               | ENSG00000259496 | 69803315-69804046 | - | 89656  |
| 15 | 69727205 | 69727503 | 299 | 69727235 | 3. 81246  | 2. 91013 | 0. 32594 | intergenic               | ENSG00000259496 | 69803315-69804046 | - | 76692  |
| 15 | 69755638 | 69755919 | 282 | 69755790 | 9. 27287  | 5. 50951 | 4. 35502 | intergenic               | ENSG00000259496 | 69803315-69804046 | - | 48268  |
| 15 | 69761036 | 69761269 | 234 | 69761113 | 8. 9436   | 5. 11735 | 4. 08953 | intergenic               | ENSG00000259496 | 69803315-69804046 | - | 42894  |
| 15 | 69979904 | 69980142 | 239 | 69980047 | 7. 3143   | 4. 5382  | 2. 6406  | intergenic               | ENSG00000207965 | 70079371-70079468 | - | 99445  |
| 15 | 70602185 | 70602420 | 236 | 70602191 | 3. 20396  | 2. 64557 | 0. 26167 | ENSG00000259227:exon     | ENSG00000259227 | 70602123-70602516 | + | 179    |
| 15 | 70669183 | 70669435 | 253 | 70669283 | 6. 4824   | 4. 21404 | 1. 94623 | ENSG00000137831:exon     | ENSG00000280515 | 70635248-70637314 | + | 34060  |
| 15 | 71643380 | 71643678 | 299 | 71643548 | 3. 49438  | 2. 91742 | 0. 30123 | ENSG00000187720:intron   | ENSG00000278408 | 71547279-71549832 | - | -93696 |
| 15 | 71984906 | 71985233 | 328 | 71985065 | 3. 77589  | 3. 20345 | 0. 30123 | ENSG00000261632:intron;E | ENSG00000261632 | 71972205-72040265 | + | 12864  |
| 15 | 71985490 | 71985731 | 242 | 71985698 | 3. 6499   | 2. 91341 | 0. 30123 | NSG00000066933:intron    | ENSG00000261632 | 71972205-72040265 | + | 13405  |
| 15 | 72692597 | 72692846 | 250 | 72692701 | 4. 56295  | 3. 60388 | 0. 59373 | ENSG00000140463:intron   | ENSG00000140463 | 72686178-72738476 | + | 6543   |
| 15 | 74021984 | 74022288 | 305 | 74022064 | 5. 68188  | 3. 88989 | 1. 31322 | ENSG00000140464:intron   | ENSG00000140464 | 73994672-74047812 | + | 27463  |
| 15 | 75043112 | 75043364 | 253 | 75043205 | 8. 62542  | 3. 92169 | 3. 79549 | intergenic               | ENSG00000138621 | 75023554-75117462 | + | 19683  |
| 15 | 76408790 | 76409023 | 234 | 76408930 | 4. 56295  | 3. 60388 | 0. 59373 | ENSG00000140386:intron   | ENSG00000261232 | 76472098-76472365 | + | -63192 |
| 15 | 81301844 | 81302117 | 274 | 81301990 | 10. 64217 | 4. 64231 | 5. 60051 | ENSG00000172349:intron   | ENSG00000271725 | 81303214-81309391 | - | 7411   |
| 15 | 81496473 | 81496722 | 250 | 81496680 | 3. 53038  | 3. 04135 | 0. 30123 | ENSG00000259543:intron;E | ENSG00000259594 | 81554002-81696780 | + | -57405 |
| 15 | 81509376 | 81509614 | 239 | 81509436 | 4. 56295  | 3. 60388 | 0. 59373 | NSG00000259343:intron    | ENSG00000259594 | 81554002-81696780 | + | -44507 |
| 15 | 81514851 | 81515092 | 242 | 81514987 | 5. 8934   | 4. 17062 | 1. 48561 | ENSG00000259543:intron;E | ENSG00000259594 | 81554002-81696780 | + | -39031 |
| 15 | 81496473 | 81496722 | 250 | 81496680 | 3. 53038  | 3. 04135 | 0. 30123 | NSG00000259343:intron    | ENSG00000259594 | 81554002-81696780 | + | -57405 |
| 15 | 81509376 | 81509614 | 239 | 81509436 | 4. 56295  | 3. 60388 | 0. 59373 | ENSG00000259543:intron;E | ENSG00000259594 | 81554002-81696780 | + | -44507 |
| 15 | 81514851 | 81515092 | 242 | 81514987 | 5. 8934   | 4. 17062 | 1. 48561 | NSG00000259343:intron    | ENSG00000259594 | 81554002-81696780 | + | -39031 |
| 15 | 81807738 | 81807971 | 234 | 81807919 | 5. 39424  | 4. 00432 | 1. 09512 | ENSG00000259692:intron   | ENSG00000259692 | 81660481-81871125 | - | 63271  |
| 15 | 81880216 | 81880528 | 313 | 81880386 | 5. 39424  | 4. 00432 | 1. 09512 | intergenic               | ENSG00000259692 | 81660481-81871125 | - | -9246  |
| 15 | 85330921 | 85331282 | 362 | 85331139 | 5. 26629  | 3. 39198 | 1. 07888 | ENSG00000218052:Promoter | ENSG00000218052 | 85255368-85330334 | - | -767   |
| 15 | 85413517 | 85413763 | 247 | 85413645 | 10. 65162 | 5. 29115 | 5. 60305 | ENSG00000170776:intron;E | ENSG00000259630 | 85415227-85415633 | + | -1587  |
| 15 | 85978463 | 85978707 | 245 | 85978540 | 5. 19114  | 3. 87478 | 1. 02732 | NSG00000259630:Promoter  | ENSG00000259608 | 85958716-85958971 | - | -19613 |
| 15 | 88638818 | 88639085 | 268 | 88638989 | 9. 95162  | 4. 34993 | 4. 97164 | intergenic               | ENSG00000172183 | 88636152-88656483 | + | 2799   |
| 15 | 88764922 | 88765141 | 220 | 88764999 | 4. 14216  | 3. 33173 | 0. 51073 | ENSG00000140525:intron   | ENSG00000259676 | 88797412-88798734 | - | 33703  |
| 15 | 89303271 | 89303477 | 207 | 89303364 | 4. 42776  | 3. 51628 | 0. 59373 | ENSG00000259291:intron;E | ENSG00000275101 | 89326738-89326810 | - | 23436  |
| 15 | 90075515 | 90075747 | 233 | 90075615 | 5. 6982   | 3. 75745 | 1. 3285  | NSG00000140548:intron;EN | ENSG00000276376 | 90076423-90076486 | + | -792   |
| 15 | 92156388 | 92156623 | 236 | 92156476 | 5. 29302  | 3. 93971 | 1. 09512 | SG00000276376:Promoter   | ENSG00000258761 | 92162797-92172436 | - | 15931  |
| 15 | 96211518 | 96211800 | 283 | 96211657 | 3. 77589  | 3. 20345 | 0. 30123 | ENSG00000176463:intron   | ENSG00000278146 | 96230896-96231145 | + | -19237 |
|    |          |          |     |          |           |          |          | ENSG00000247809:intron;E |                 |                   |   |        |
|    |          |          |     |          |           |          |          | NSG00000275443:intron    |                 |                   |   |        |

|    |           |           |     |           |           |          |           |                                                    |                 |                     |   |         |
|----|-----------|-----------|-----|-----------|-----------|----------|-----------|----------------------------------------------------|-----------------|---------------------|---|---------|
| 15 | 96399326  | 96399702  | 377 | 96399431  | 4. 56295  | 3. 60388 | 0. 59373  | ENSG00000259542:intron;E<br>NSG00000259275:intron  | ENSG00000259542 | 96393145-96405189   | - | 5675    |
| 15 | 101193134 | 101193378 | 245 | 101193162 | 4. 22478  | 3. 38503 | 0. 55558  | ENSG00000131873:intron                             | ENSG00000259182 | 101168529-101170821 | + | 24726   |
| 15 | 101199785 | 101200118 | 334 | 101199935 | 13. 91069 | 5. 59892 | 8. 58776  | ENSG00000131873:intron                             | ENSG00000259182 | 101168529-101170821 | + | 31422   |
| 15 | 101193134 | 101193378 | 245 | 101193162 | 4. 22478  | 3. 38503 | 0. 55558  | ENSG00000131873:intron                             | ENSG00000259182 | 101168529-101170821 | + | 24726   |
| 15 | 101199785 | 101200118 | 334 | 101199935 | 13. 91069 | 5. 59892 | 8. 58776  | ENSG00000131873:intron                             | ENSG00000259182 | 101168529-101170821 | + | 31422   |
| 15 | 101233511 | 101233736 | 226 | 101233648 | 4. 88847  | 3. 6826  | 0. 81688  | ENSG00000131873:intron<br>ENSG00000007384:Promoter | ENSG00000131873 | 101175722-101251932 | - | 18309   |
| 16 | 72621     | 72831     | 211 | 72783     | 8. 23437  | 4. 24593 | 3. 43385  | ;ENSG00000278995:Promote<br>r                      | ENSG00000278995 | 74682-74961         | + | -1956   |
| 16 | 1722277   | 1722558   | 282 | 1722415   | 6. 45945  | 4. 36218 | 1. 93323  | ENSG00000138834:intron                             | ENSG00000261399 | 1713526-1714208     | - | -8209   |
| 16 | 8124376   | 8124660   | 285 | 8124569   | 3. 49438  | 2. 91742 | 0. 30123  | intergenic                                         | ENSG00000260003 | 8276262-8295700     | - | 171182  |
| 16 | 8145462   | 8145716   | 255 | 8145537   | 3. 03786  | 2. 80302 | 0. 15111  | intergenic                                         | ENSG00000260003 | 8276262-8295700     | - | 150111  |
| 16 | 9970262   | 9970509   | 248 | 9970424   | 4. 84177  | 3. 65305 | 0. 77787  | ENSG00000183454:intron                             | ENSG00000261810 | 10033683-10037297   | + | -63298  |
| 16 | 9986478   | 9986724   | 247 | 9986666   | 3. 77589  | 3. 20345 | 0. 30123  | ENSG00000183454:intron                             | ENSG00000261810 | 10033683-10037297   | + | -47082  |
| 16 | 10738858  | 10739222  | 365 | 10739012  | 11. 81017 | 6. 34701 | 6. 66017  | intergenic                                         | ENSG00000103274 | 10743785-10769351   | + | -4745   |
| 16 | 10871195  | 10871441  | 247 | 10871315  | 5. 62443  | 3. 85549 | 1. 28474  | ENSG00000262151:intron                             | ENSG00000179583 | 10866221-10943021   | + | 5096    |
| 16 | 11328591  | 11328813  | 223 | 11328653  | 8. 85591  | 4. 88357 | 4. 00947  | ENSG00000175643:intron                             | ENSG00000199668 | 11315066-11315178   | + | 13635   |
| 16 | 11682660  | 11682956  | 297 | 11682749  | 9. 43096  | 5. 20133 | 4. 50508  | ENSG00000153066:intron                             | ENSG00000184602 | 11668413-11679159   | + | 14394   |
| 16 | 12027130  | 12027482  | 353 | 12027279  | 10. 65162 | 5. 29115 | 5. 60305  | ENSG00000048471:intron                             | ENSG00000260488 | 11976850-11977850   | - | -49455  |
| 16 | 13218936  | 13219202  | 267 | 13219082  | 4. 56295  | 3. 60388 | 0. 59373  | ENSG00000237515:intron                             | ENSG00000262116 | 13197605-13204907   | - | -14161  |
| 16 | 13864996  | 13865247  | 252 | 13865047  | 4. 383    | 3. 48731 | 0. 59373  | intergenic                                         | ENSG00000175595 | 13920156-13952345   | + | -55035  |
| 16 | 15674488  | 15674722  | 235 | 15674616  | 6. 22868  | 4. 22079 | 1. 75945  | ENSG00000072864:intron                             | ENSG00000262380 | 15683289-15684570   | + | -8684   |
| 16 | 16102512  | 16102735  | 224 | 16102617  | 4. 58409  | 3. 36557 | 0. 61075  | ENSG00000103222:intron                             | ENSG00000241067 | 16094191-16095209   | - | -7414   |
| 16 | 17029914  | 17030172  | 259 | 17030116  | 5. 32771  | 3. 96184 | 1. 09512  | intergenic                                         | ENSG00000279490 | 17082294-17085049   | - | 55006   |
| 16 | 17259403  | 17259666  | 264 | 17259561  | 16. 55362 | 7. 28351 | 11. 05902 | ENSG00000103489:intron                             | ENSG00000279620 | 17249673-17251395   | - | -8139   |
| 16 | 19384708  | 19384925  | 218 | 19384820  | 6. 36907  | 4. 30669 | 1. 85528  | ENSG00000259925:intron                             | ENSG00000280265 | 19392212-19393468   | - | 8652    |
| 16 | 23335767  | 23336239  | 473 | 23336147  | 8. 9436   | 5. 11735 | 4. 08953  | ENSG00000168447:intron                             | ENSG00000168447 | 23278230-23381299   | + | 57772   |
| 16 | 24231755  | 24232038  | 284 | 24231946  | 4. 00012  | 3. 12743 | 0. 45978  | intergenic                                         | ENSG00000260264 | 24236103-24252863   | + | -4207   |
| 16 | 25048800  | 25049071  | 272 | 25048837  | 3. 81246  | 2. 91013 | 0. 32594  | ENSG00000262587:intron                             | ENSG00000262587 | 25031743-25058109   | + | 17192   |
| 16 | 25607917  | 25608209  | 293 | 25608101  | 7. 73286  | 4. 96898 | 3. 01041  | intergenic                                         | ENSG00000182601 | 25692025-26137688   | + | -83962  |
| 16 | 25656142  | 25656372  | 231 | 25656325  | 3. 63193  | 3. 10837 | 0. 30123  | intergenic                                         | ENSG00000182601 | 25692025-26137688   | + | -35768  |
| 16 | 25607917  | 25608209  | 293 | 25608101  | 7. 73286  | 4. 96898 | 3. 01041  | intergenic                                         | ENSG00000182601 | 25692025-26137688   | + | -83962  |
| 16 | 25656142  | 25656372  | 231 | 25656325  | 3. 63193  | 3. 10837 | 0. 30123  | intergenic                                         | ENSG00000182601 | 25692025-26137688   | + | -35768  |
| 16 | 27355572  | 27355808  | 237 | 27355746  | 3. 6499   | 2. 91341 | 0. 30123  | ENSG00000077238:intron                             | ENSG00000274092 | 27313386-27314101   | - | -41588  |
| 16 | 27537654  | 27537872  | 219 | 27537772  | 4. 84177  | 3. 65305 | 0. 77787  | ENSG00000077235:intron                             | ENSG00000077235 | 27459554-27549913   | - | 12150   |
| 16 | 31265420  | 31265641  | 222 | 31265506  | 5. 24168  | 3. 90698 | 1. 06394  | ENSG00000169896:intron                             | ENSG00000169896 | 31259966-31332892   | + | 5564    |
| 16 | 34572644  | 34572851  | 208 | 34572736  | 6. 13491  | 1. 76265 | 1. 68471  | intergenic                                         | ENSG00000284209 | 34353615-34371659   | - | -201088 |
| 16 | 34576409  | 34576618  | 210 | 34576499  | 25. 81676 | 2. 33136 | 19. 98989 | intergenic                                         | ENSG00000284209 | 34353615-34371659   | - | -204854 |
| 16 | 34582973  | 34583566  | 594 | 34583058  | 62. 27531 | 1. 92033 | 55. 53629 | intergenic                                         | ENSG00000284209 | 34353615-34371659   | - | -211610 |
| 16 | 34588038  | 34588281  | 244 | 34588175  | 84. 55322 | 2. 54151 | 77. 40413 | intergenic                                         | ENSG00000284209 | 34353615-34371659   | - | -216500 |
| 16 | 34572644  | 34572851  | 208 | 34572736  | 6. 13491  | 1. 76265 | 1. 68471  | intergenic                                         | ENSG00000284209 | 34353615-34371659   | - | -201088 |
| 16 | 34576409  | 34576618  | 210 | 34576499  | 25. 81676 | 2. 33136 | 19. 98989 | intergenic                                         | ENSG00000284209 | 34353615-34371659   | - | -204854 |
| 16 | 34582973  | 34583566  | 594 | 34583058  | 62. 27531 | 1. 92033 | 55. 53629 | intergenic                                         | ENSG00000284209 | 34353615-34371659   | - | -211610 |
| 16 | 34588038  | 34588281  | 244 | 34588175  | 84. 55322 | 2. 54151 | 77. 40413 | intergenic                                         | ENSG00000284209 | 34353615-34371659   | - | -216500 |
| 16 | 34572644  | 34572851  | 208 | 34572736  | 6. 13491  | 1. 76265 | 1. 68471  | intergenic                                         | ENSG00000284209 | 34353615-34371659   | - | -201088 |
| 16 | 34576409  | 34576618  | 210 | 34576499  | 25. 81676 | 2. 33136 | 19. 98989 | intergenic                                         | ENSG00000284209 | 34353615-34371659   | - | -204854 |
| 16 | 34582973  | 34583566  | 594 | 34583058  | 62. 27531 | 1. 92033 | 55. 53629 | intergenic                                         | ENSG00000284209 | 34353615-34371659   | - | -211610 |
| 16 | 34588038  | 34588281  | 244 | 34588175  | 84. 55322 | 2. 54151 | 77. 40413 | intergenic                                         | ENSG00000284209 | 34353615-34371659   | - | -216500 |
| 16 | 46380779  | 46381005  | 227 | 46380860  | 31. 76341 | 2. 63725 | 25. 78696 | intergenic                                         | ENSG00000199448 | 46556088-46556191   | - | 175299  |
| 16 | 46387841  | 46388059  | 219 | 46387935  | 79. 96134 | 1. 86118 | 72. 84288 | intergenic                                         | ENSG00000199448 | 46556088-46556191   | - | 168241  |



|    |          |          |     |          |          |         |          |                                                                            |                 |                   |   |        |
|----|----------|----------|-----|----------|----------|---------|----------|----------------------------------------------------------------------------|-----------------|-------------------|---|--------|
| 16 | 46394689 | 46394997 | 309 | 46394873 | 57.95827 | 1.57452 | 51.35972 | intergenic                                                                 | ENSG00000199448 | 46556088-46556191 | - | 161348 |
| 16 | 46399391 | 46399627 | 237 | 46399496 | 88.18564 | 1.90458 | 80.99057 | intergenic                                                                 | ENSG00000199448 | 46556088-46556191 | - | 156682 |
| 16 | 46400469 | 46401069 | 601 | 46400552 | 17.03701 | 1.56443 | 11.52195 | intergenic                                                                 | ENSG00000199448 | 46556088-46556191 | - | 155422 |
| 16 | 50121230 | 50121455 | 226 | 50121345 | 10.60738 | 5.45811 | 5.56869  | ENSG00000260381:intron<br>ENSG00000166164:exon;ENS                         | ENSG00000260381 | 50100338-50121943 | - | 601    |
| 16 | 50318508 | 50318728 | 221 | 50318614 | 4.458    | 3.53587 | 0.59373  | G00000166164:three_prime<br>ITR                                            | ENSG00000274969 | 50292615-50292675 | + | 26002  |
| 16 | 53060317 | 53060624 | 308 | 53060473 | 4.1849   | 3.24157 | 0.52478  | ENSG00000177200:intron                                                     | ENSG00000177200 | 53055032-53329150 | + | 5438   |
| 16 | 54501301 | 54501571 | 271 | 54501453 | 3.6499   | 2.91341 | 0.30123  | intergenic                                                                 | ENSG00000283304 | 54542807-54559100 | - | 57664  |
| 16 | 56608308 | 56608617 | 310 | 56608457 | 9.78373  | 4.69287 | 4.83465  | ENSG00000125148:five_pri<br>me_UTR;ENSG00000125148:e                       | ENSG00000125148 | 56608198-56609497 | + | 264    |
| 16 | 65193719 | 65193971 | 253 | 65193819 | 4.84177  | 3.65305 | 0.77787  | ENSG00000260834:intron                                                     | ENSG00000259847 | 65141755-65176713 | - | -17131 |
| 16 | 67042843 | 67043084 | 242 | 67042996 | 3.36259  | 2.93078 | 0.30123  | ENSG00000067955:intron                                                     | ENSG00000067955 | 67029115-67101058 | + | 13848  |
| 16 | 67211650 | 67211895 | 246 | 67211766 | 5.59518  | 3.83801 | 1.25935  | ENSG00000125122:intron                                                     | ENSG00000280163 | 67205174-67206849 | - | -4923  |
| 16 | 71240249 | 71240467 | 219 | 71240353 | 5.29302  | 3.93971 | 1.09512  | intergenic                                                                 | ENSG00000157423 | 70807377-71230722 | - | -9635  |
| 16 | 71255960 | 71256185 | 226 | 71256135 | 4.07388  | 3.28775 | 0.47041  | intergenic                                                                 | ENSG00000157423 | 70807377-71230722 | - | -25350 |
| 16 | 78742505 | 78742766 | 262 | 78742662 | 15.49818 | 8.00863 | 10.06014 | ENSG00000186153:intron                                                     | ENSG00000243101 | 78825280-78826006 | + | -82645 |
| 16 | 79628520 | 79628769 | 250 | 79628630 | 7.68921  | 4.9422  | 2.9717   | intergenic                                                                 | ENSG00000275040 | 79619468-79620110 | + | 9176   |
| 17 | 1080897  | 1081169  | 273 | 1080969  | 4.60755  | 3.1497  | 0.62762  | ENSG00000159842:intron                                                     | ENSG00000278794 | 1101006-1101273   | - | 20240  |
| 17 | 1089417  | 1089693  | 277 | 1089568  | 4.53041  | 3.45699 | 0.59373  | ENSG00000159842:intron                                                     | ENSG00000278794 | 1101006-1101273   | - | 11718  |
| 17 | 1115126  | 1115718  | 593 | 1115287  | 11.51693 | 6.17716 | 6.39216  | ENSG00000159842:intron                                                     | ENSG00000278794 | 1101006-1101273   | - | -14148 |
| 17 | 1080897  | 1081169  | 273 | 1080969  | 4.60755  | 3.1497  | 0.62762  | ENSG00000159842:intron                                                     | ENSG00000278794 | 1101006-1101273   | - | 20240  |
| 17 | 1089417  | 1089693  | 277 | 1089568  | 4.53041  | 3.45699 | 0.59373  | ENSG00000159842:intron                                                     | ENSG00000278794 | 1101006-1101273   | - | 11718  |
| 17 | 1115126  | 1115718  | 593 | 1115287  | 11.51693 | 6.17716 | 6.39216  | ENSG00000159842:intron<br>ENSG00000159961:exon;ENS                         | ENSG00000278794 | 1101006-1101273   | - | -14148 |
| 17 | 3423298  | 3423518  | 221 | 3423492  | 4.35356  | 3.46825 | 0.59373  | G00000159961:three_prime<br>ITR                                            | ENSG00000127780 | 3432869-3433841   | - | 10433  |
| 17 | 3558741  | 3559103  | 363 | 3558886  | 4.86323  | 3.17994 | 0.79494  | ENSG00000167723:Promoter                                                   | ENSG00000167723 | 3510501-3557995   | - | -926   |
| 17 | 5798045  | 5798309  | 265 | 5798245  | 3.03786  | 2.80302 | 0.15111  | ENSG00000284837:intron;E<br>NSG00000285471:intron                          | ENSG00000285471 | 5772925-6080792   | + | 25251  |
| 17 | 5825126  | 5825359  | 234 | 5825222  | 7.41563  | 4.77491 | 2.72     | ENSG00000284837:intron;E<br>NSG00000285471:intron                          | ENSG00000285471 | 5772925-6080792   | + | 52317  |
| 17 | 6223334  | 6223570  | 237 | 6223453  | 13.68988 | 7.2038  | 8.38804  | intergenic                                                                 | ENSG00000206618 | 6207162-6207269   | + | 16289  |
| 17 | 6311688  | 6311921  | 234 | 6311708  | 4.29558  | 3.43077 | 0.59373  | intergenic                                                                 | ENSG00000262609 | 6322412-6323228   | - | 11424  |
| 17 | 6346497  | 6346702  | 206 | 6346648  | 3.03786  | 2.80302 | 0.15111  | intergenic                                                                 | ENSG00000262609 | 6322412-6323228   | - | -23371 |
| 17 | 7842696  | 7842951  | 256 | 7842763  | 4.37258  | 3.23911 | 0.59373  | ENSG00000132510:intron                                                     | ENSG00000132510 | 7839903-7854796   | + | 2920   |
| 17 | 8196126  | 8196394  | 269 | 8196277  | 10.54093 | 5.83399 | 5.51529  | intergenic                                                                 | ENSG00000271002 | 8199122-8199437   | - | 3177   |
| 17 | 8325236  | 8325468  | 233 | 8325309  | 5.26135  | 3.63995 | 1.07719  | intergenic                                                                 | ENSG00000212206 | 8329582-8329719   | + | -4230  |
| 17 | 8359884  | 8360137  | 254 | 8360087  | 5.73591  | 4.07212 | 1.35894  | ENSG00000184619:intron                                                     | ENSG00000265749 | 8365562-8381328   | + | -5552  |
| 17 | 8422230  | 8422474  | 245 | 8422344  | 4.1849   | 3.24157 | 0.52478  | intergenic                                                                 | ENSG00000166579 | 8413130-8490411   | + | 9221   |
| 17 | 10390423 | 10390646 | 224 | 10390516 | 5.39424  | 4.00432 | 1.09512  | ENSG00000272975:intron;E<br>NSG00000133020:exon;ENSG<br>00000272736:intron | ENSG00000272975 | 10383143-10623886 | + | 7391   |
| 17 | 10590074 | 10590467 | 394 | 10590420 | 3.77589  | 3.20345 | 0.30123  | ENSG00000272975:intron;E<br>NSG00000214970:intron                          | ENSG00000214970 | 10579039-10623036 | + | 11231  |
| 17 | 12177586 | 12177863 | 278 | 12177722 | 7.17425  | 4.80518 | 2.52654  | intergenic                                                                 | ENSG00000265400 | 12201599-12215267 | + | -23875 |
| 17 | 12324325 | 12324543 | 219 | 12324385 | 3.77589  | 3.20345 | 0.30123  | intergenic                                                                 | ENSG00000265400 | 12201599-12215267 | + | 122834 |
| 17 | 14321199 | 14321444 | 246 | 14321269 | 3.77589  | 3.20345 | 0.30123  | ENSG00000125430:intron                                                     | ENSG00000266378 | 14327334-14329474 | + | -6013  |
| 17 | 15959173 | 15959518 | 346 | 15959336 | 16.55686 | 6.22102 | 11.06094 | ENSG00000170425:intron                                                     | ENSG00000170425 | 15944916-15975746 | + | 14429  |
| 17 | 21287966 | 21288260 | 295 | 21288083 | 15.56859 | 5.80288 | 10.12304 | ENSG00000034152:intron                                                     | ENSG00000034152 | 21284671-21315240 | + | 3441   |

|    |          |          |     |          |          |         |          |                          |                 |                   |   |          |
|----|----------|----------|-----|----------|----------|---------|----------|--------------------------|-----------------|-------------------|---|----------|
| 17 | 22977519 | 22977740 | 222 | 22977631 | 4.56295  | 3.60388 | 0.59373  | intergenic               | ENSG00000264431 | 22693324-22694831 | - | -282798  |
| 17 | 23016272 | 23016555 | 284 | 23016412 | 28.66482 | 3.08636 | 22.76824 | intergenic               | ENSG00000264431 | 22693324-22694831 | - | -321582  |
| 17 | 22977519 | 22977740 | 222 | 22977631 | 4.56295  | 3.60388 | 0.59373  | intergenic               | ENSG00000264431 | 22693324-22694831 | - | -282798  |
| 17 | 23016272 | 23016555 | 284 | 23016412 | 28.66482 | 3.08636 | 22.76824 | intergenic               | ENSG00000264431 | 22693324-22694831 | - | -321582  |
| 17 | 25242843 | 25243058 | 216 | 25242957 | 6.4824   | 4.21404 | 1.94623  | intergenic               | ENSG00000263433 | 26981693-26982090 | + | -1738743 |
| 17 | 26603714 | 26603972 | 259 | 26603844 | 74.61496 | 2.2178  | 67.61958 | intergenic               | ENSG00000263433 | 26981693-26982090 | + | -377850  |
| 17 | 26619462 | 26619792 | 331 | 26619735 | 11.48992 | 1.58197 | 6.36995  | intergenic               | ENSG00000263433 | 26981693-26982090 | + | -362066  |
| 17 | 26964455 | 26964673 | 219 | 26964540 | 3.64836  | 3.01523 | 0.30123  | intergenic               | ENSG00000263433 | 26981693-26982090 | + | -17129   |
| 17 | 25242843 | 25243058 | 216 | 25242957 | 6.4824   | 4.21404 | 1.94623  | intergenic               | ENSG00000263433 | 26981693-26982090 | + | -1738743 |
| 17 | 26603714 | 26603972 | 259 | 26603844 | 74.61496 | 2.2178  | 67.61958 | intergenic               | ENSG00000263433 | 26981693-26982090 | + | -377850  |
| 17 | 26619462 | 26619792 | 331 | 26619735 | 11.48992 | 1.58197 | 6.36995  | intergenic               | ENSG00000263433 | 26981693-26982090 | + | -362066  |
| 17 | 26964455 | 26964673 | 219 | 26964540 | 3.64836  | 3.01523 | 0.30123  | intergenic               | ENSG00000263433 | 26981693-26982090 | + | -17129   |
| 17 | 25242843 | 25243058 | 216 | 25242957 | 6.4824   | 4.21404 | 1.94623  | intergenic               | ENSG00000263433 | 26981693-26982090 | + | -1738743 |
| 17 | 26603714 | 26603972 | 259 | 26603844 | 74.61496 | 2.2178  | 67.61958 | intergenic               | ENSG00000263433 | 26981693-26982090 | + | -377850  |
| 17 | 26619462 | 26619792 | 331 | 26619735 | 11.48992 | 1.58197 | 6.36995  | intergenic               | ENSG00000263433 | 26981693-26982090 | + | -362066  |
| 17 | 26964455 | 26964673 | 219 | 26964540 | 3.64836  | 3.01523 | 0.30123  | intergenic               | ENSG00000263433 | 26981693-26982090 | + | -17129   |
| 17 | 27332789 | 27333038 | 250 | 27332931 | 9.48025  | 4.55013 | 4.55226  | ENSG00000266313:Promoter | ENSG00000266313 | 27333255-27348491 | + | -342     |
| 17 | 27500082 | 27500431 | 350 | 27500275 | 4.9037   | 3.69224 | 0.82412  | ENSG00000141068:intron   | ENSG00000263368 | 27526385-27527223 | - | 26967    |
| 17 | 27532383 | 27532654 | 272 | 27532497 | 5.39424  | 4.00432 | 1.09512  | ENSG00000141068:intron   | ENSG00000263368 | 27526385-27527223 | - | -5295    |
| 17 | 27500082 | 27500431 | 350 | 27500275 | 4.9037   | 3.69224 | 0.82412  | ENSG00000141068:intron   | ENSG00000263368 | 27526385-27527223 | - | 26967    |
| 17 | 27532383 | 27532654 | 272 | 27532497 | 5.39424  | 4.00432 | 1.09512  | ENSG00000141068:intron   | ENSG00000263368 | 27526385-27527223 | - | -5295    |
| 17 | 28306105 | 28306338 | 234 | 28306264 | 3.42114  | 2.96933 | 0.30123  | ENSG00000265480:intron   | ENSG00000265480 | 28275985-28317783 | - | 11562    |
| 17 | 28328649 | 28328985 | 337 | 28328774 | 4.11517  | 3.31434 | 0.49781  | ENSG00000109083:intron   | ENSG00000109083 | 28328324-28335489 | - | 6672     |
| 17 | 29192388 | 29192640 | 253 | 29192591 | 4.66864  | 3.54383 | 0.67357  | intergenic               | ENSG00000264050 | 29197070-29197785 | - | 5271     |
| 17 | 32367947 | 32368281 | 335 | 32368033 | 4.458    | 3.53587 | 0.59373  | ENSG0000010244:intron    | ENSG0000010244  | 32350116-32381886 | + | 17997    |
| 17 | 32745924 | 32746308 | 385 | 32746076 | 7.17425  | 4.80518 | 2.52654  | ENSG00000176658:intron   | ENSG00000201178 | 32830218-32830329 | - | 84213    |
| 17 | 32815613 | 32815889 | 277 | 32815740 | 5.0924   | 3.81196 | 0.95207  | ENSG00000176658:intron   | ENSG00000201178 | 32830218-32830329 | - | 14578    |
| 17 | 32745924 | 32746308 | 385 | 32746076 | 7.17425  | 4.80518 | 2.52654  | ENSG00000176658:intron   | ENSG00000201178 | 32830218-32830329 | - | 84213    |
| 17 | 32815613 | 32815889 | 277 | 32815740 | 5.0924   | 3.81196 | 0.95207  | ENSG00000176658:intron   | ENSG00000201178 | 32830218-32830329 | - | 14578    |
| 17 | 34371319 | 34371562 | 244 | 34371387 | 5.46637  | 3.76126 | 1.15159  | intergenic               | ENSG00000108702 | 34360327-34363231 | - | -8209    |
| 17 | 34387164 | 34387408 | 245 | 34387256 | 7.42804  | 4.43549 | 2.73175  | intergenic               | ENSG00000108702 | 34360327-34363231 | - | -24054   |
| 17 | 34415372 | 34415579 | 208 | 34415537 | 5.08244  | 3.66786 | 0.94504  | intergenic               | ENSG00000108702 | 34360327-34363231 | - | -52244   |
| 17 | 35063535 | 35063790 | 256 | 35063704 | 7.56656  | 4.19944 | 2.85958  | ENSG00000092871:intron;E | ENSG00000267457 | 35073830-35074374 | - | 10712    |
| 17 | 35922056 | 35922574 | 519 | 35922118 | 4.56295  | 3.60388 | 0.59373  | NSG00000267618:intron    | ENSG00000271013 | 35912634-35918010 | - | -4304    |
| 17 | 39082994 | 39083263 | 270 | 39083136 | 4.11506  | 3.19834 | 0.49781  | ENSG00000161381:intron;E | ENSG00000263818 | 39057018-39113190 | + | 26110    |
| 17 | 39770051 | 39770291 | 241 | 39770177 | 9.91774  | 5.27833 | 4.94121  | NSG00000263818:intron    | ENSG00000141738 | 39737926-39747291 | + | 32244    |
| 17 | 40314625 | 40314917 | 293 | 40314719 | 8.9617   | 4.6034  | 4.09625  | ENSG00000161405:intron   | ENSG00000131759 | 40309191-40357643 | + | 5579     |
| 17 | 40587094 | 40587430 | 337 | 40587411 | 3.02441  | 2.62206 | 0.15111  | ENSG00000131759:intron   | ENSG00000279775 | 40597112-40598585 | - | 11323    |
| 17 | 40621279 | 40621556 | 278 | 40621475 | 5.42487  | 3.87873 | 1.11519  | intergenic               | ENSG00000279775 | 40597112-40598585 | - | -22832   |
| 17 | 41453141 | 41453365 | 225 | 41453211 | 5.0124   | 3.76115 | 0.89533  | intergenic               | ENSG00000279775 | 40597112-40598585 | - | -22832   |
| 17 | 43167462 | 43167701 | 240 | 43167536 | 4.62651  | 3.51732 | 0.63659  | ENSG00000236473:intron   | ENSG00000236473 | 41448182-41454055 | - | 802      |
| 17 | 43484608 | 43484847 | 240 | 43484722 | 6.06008  | 4.11811 | 1.6243   | ENSG00000267002:exon     | ENSG00000267595 | 43168169-43168249 | - | 668      |
| 17 | 43497498 | 43497712 | 215 | 43497574 | 5.96569  | 4.21594 | 1.54281  | ENSG00000067596:intron   | ENSG00000067596 | 43483864-43610338 | + | 863      |
| 17 | 44807641 | 44808139 | 499 | 44808095 | 4.31475  | 3.20475 | 0.59373  | ENSG00000067596:intron   | ENSG00000067596 | 43483864-43610338 | + | 13740    |
| 17 | 46764486 | 46764763 | 278 | 46764600 | 3.33182  | 2.81469 | 0.30123  | ENSG00000182963:intron   | ENSG00000267405 | 44794746-44797783 | - | -10106   |
| 17 | 48459086 | 48459307 | 222 | 48459218 | 4.71137  | 3.57074 | 0.70668  | intergenic               | ENSG00000213326 | 46721581-46722167 | - | -42457   |
| 17 | 48505839 | 48506099 | 261 | 48505992 | 10.78028 | 5.75701 | 5.71968  | ENSG00000264451:Promoter | ENSG00000264451 | 48460369-48466040 | + | -1173    |
| 17 | 48511142 | 48511552 | 411 | 48511272 | 5.95396  | 3.63426 | 1.53177  | intergenic               | ENSG00000120094 | 48528525-48531001 | - | 25032    |
| 17 | 48505839 | 48506099 | 261 | 48505992 | 10.78028 | 5.75701 | 5.71968  | intergenic               | ENSG00000120094 | 48528525-48531001 | - | 19654    |
| 17 | 48505839 | 48506099 | 261 | 48505992 | 10.78028 | 5.75701 | 5.71968  | intergenic               | ENSG00000120094 | 48528525-48531001 | - | 25032    |

|    |          |          |     |          |          |          |          |                          |                          |                          |   |        |
|----|----------|----------|-----|----------|----------|----------|----------|--------------------------|--------------------------|--------------------------|---|--------|
| 17 | 48511142 | 48511552 | 411 | 48511272 | 5.95396  | 3.63426  | 1.53177  | intergenic               | ENSG00000120094          | 48528525-48531001        | - | 19654  |
| 17 | 49342300 | 49342518 | 219 | 49342453 | 6.51471  | 4.39616  | 1.96373  | ENSG00000198740:intron   | ENSG00000248714          | 49361164-49369998        | + | -18755 |
| 17 | 51338975 | 51339358 | 384 | 51339186 | 3.49438  | 2.91742  | 0.30123  | ENSG00000267452:intron   | ENSG00000267452          | 51336714-51445802        | + | 2452   |
| 17 | 55705956 | 55706226 | 271 | 55706059 | 5.11088  | 3.68528  | 0.9653   | intergenic               | ENSG00000166292          | 55719626-55732121        | - | 26030  |
| 17 | 58232004 | 58232226 | 223 | 58232141 | 7.47727  | 4.8125   | 2.77843  | ENSG00000167419:intron   | ENSG00000011143          | 58205436-58219605        | + | -12509 |
| 17 | 59786484 | 59786849 | 366 | 59786676 | 45.87442 | 16.35818 | 39.56588 | ENSG00000062716:intron   | ENSG00000267637          | 59784812-59785035        | + | 1854   |
| 17 | 60545781 | 60546040 | 260 | 60545806 | 4.16942  | 3.34931  | 0.52478  | ENSG00000259349:intron   | ENSG00000267678          | 60562009-60562161        | - | 16251  |
| 17 | 61440131 | 61440357 | 227 | 61440313 | 5.10865  | 3.82229  | 0.9653   | intergenic               | ENSG00000121075          | 61452403-61485110        | + | -12159 |
| 17 | 64071162 | 64071415 | 254 | 64071262 | 5.93037  | 4.03949  | 1.51498  | ENSG00000178607:intron   | ENSG00000108622          | 64002593-64020634        | - | -50654 |
| 17 | 64103837 | 64104079 | 243 | 64103985 | 10.3171  | 5.11983  | 5.30248  | ENSG00000178607:intron   | ENSG00000178607          | 64039141-64130819        | - | 26861  |
| 17 | 64793009 | 64793321 | 313 | 64793041 | 4.56295  | 3.60388  | 0.59373  | ENSG00000214176:intron   | ENSG00000215769          | 64749662-64781707        | - | -11457 |
| 17 | 67199452 | 67199694 | 243 | 67199506 | 4.36824  | 3.47775  | 0.59373  | ENSG00000198265:intron   | ENSG00000264421          | 67224302-67225541        | + | -24729 |
| 17 | 68402162 | 68402475 | 314 | 68402234 | 3.29424  | 2.88581  | 0.30123  | ENSG00000141337:intron   | ENSG00000267009          | 68413622-68524949        | + | -11304 |
| 17 | 68774441 | 68775092 | 652 | 68774918 | 7.1573   | 4.79461  | 2.52654  | intergenic               | ENSG00000267250          | 68793548-68797822        | - | 23056  |
| 17 | 71927705 | 71928192 | 488 | 71928030 | 5.39424  | 4.00432  | 1.09512  | intergenic               | ENSG00000283517          | 71829869-71871750        | - | -56198 |
| 17 | 72863606 | 72863848 | 243 | 72863834 | 4.1849   | 3.24157  | 0.52478  | ENSG00000133195:intron   | ENSG00000264196          | 72839038-72839718        | + | 24688  |
| 17 | 74702213 | 74702469 | 257 | 74702317 | 4.1849   | 3.24157  | 0.52478  | ENSG00000186074:intron;E | ENSG00000186074          | 74694310-74712978        | - | 10637  |
| 17 | 76480958 | 76481334 | 377 | 76481211 | 5.79352  | 3.81213  | 1.40054  | NSG00000172794:intron    | ENSG00000129667          | 76470890-76501790        | - | 20644  |
| 17 | 76812088 | 76812349 | 262 | 76812276 | 4.07388  | 3.28775  | 0.47041  | ENSG00000129667:intron   | ENSG00000129667          | 76799043-76807102        | + | 13175  |
| 17 | 77107591 | 77107860 | 270 | 77107674 | 5.01585  | 3.49609  | 0.89533  | intergenic               | ENSG00000284250          | 77089416-77089497        | + | 18309  |
| 17 | 77325005 | 77325316 | 312 | 77325079 | 7.36237  | 4.39861  | 2.67971  | ENSG00000129657:intron   | ENSG00000284250          | 77257736-77281897        | - | -43263 |
| 17 | 77600752 | 77600982 | 231 | 77600790 | 4.31475  | 3.20475  | 0.59373  | ENSG00000184640:intron   | ENSG00000263718          | 77257736-77281897        | - | -43263 |
| 17 | 77834447 | 77834746 | 300 | 77834633 | 8.67675  | 4.78611  | 3.84073  | ENSG00000285535:intron   | ENSG00000285535          | 77590531-77680687        | + | 10335  |
| 17 | 77834612 | 77843868 | 257 | 77843717 | 6.41549  | 4.02177  | 1.89285  | intergenic               | ENSG00000204283          | 77879026-77884087        | - | 49491  |
| 17 | 77834447 | 77834746 | 300 | 77834633 | 8.67675  | 4.78611  | 3.84073  | intergenic               | ENSG00000204283          | 77879026-77884087        | - | 40347  |
| 17 | 77834612 | 77843868 | 257 | 77843717 | 6.41549  | 4.02177  | 1.89285  | intergenic               | ENSG00000204283          | 77879026-77884087        | - | 40347  |
| 17 | 82708248 | 82708501 | 254 | 82708364 | 9.43096  | 5.20133  | 4.50508  | intergenic               | ENSG00000263063          | 82713907-82716255        | - | 7881   |
| 18 | 1981572  | 1982085  | 514 | 1981886  | 6.26578  | 4.40475  | 1.75945  | intergenic               | ENSG00000264189          | 1927726-1929094          | + | -52734 |
| 18 | 3586808  | 3587122  | 315 | 3586973  | 11.26164 | 6.03046  | 6.15985  | intergenic               | ENSG00000177337          | 3593731-3598352          | + | -6766  |
| 18 | 5884403  | 5884766  | 364 | 5884583  | 10.09471 | 6.00647  | 5.09428  | ENSG00000170579:intron   | ENSG00000206432:exon;ENS | G00000206432:three_prime | + | -2902  |
| 18 | 6004798  | 6005002  | 205 | 6004931  | 7.47727  | 4.8125   | 2.77843  | IITR                     | ENSG00000206449          | 5887486-5909122          | + | -2902  |
| 18 | 6014553  | 6014768  | 216 | 6014633  | 3.77589  | 3.20345  | 0.30123  | ENSG00000154655:intron   | ENSG00000200637          | 6017722-6017839          | - | 12939  |
| 18 | 6219706  | 6219923  | 218 | 6219833  | 6.26578  | 4.40475  | 1.75945  | ENSG00000154655:intron   | ENSG00000200637          | 6017722-6017839          | - | 3179   |
| 18 | 6235306  | 6235556  | 251 | 6235350  | 3.53832  | 2.94528  | 0.30123  | ENSG00000154655:intron   | ENSG00000264707          | 6256746-6260934          | + | -36932 |
| 18 | 6291130  | 6291720  | 591 | 6291222  | 3.76522  | 3.1964   | 0.30123  | ENSG00000154655:intron   | ENSG00000264707          | 6256746-6260934          | + | -21315 |
| 18 | 7601233  | 7601482  | 250 | 7601304  | 5.82254  | 4.12626  | 1.42733  | ENSG00000173482:intron   | ENSG00000264707          | 6256746-6260934          | + | 34678  |
| 18 | 8457061  | 8457321  | 261 | 8457237  | 3.97135  | 3.22182  | 0.44441  | intergenic               | ENSG00000173482          | 7566781-8406861          | + | 34576  |
| 18 | 9066421  | 9066650  | 230 | 9066580  | 6.87511  | 4.28345  | 2.27621  | intergenic               | ENSG00000242985          | 8471830-8472128          | + | -14639 |
| 18 | 9082824  | 9083183  | 360 | 9082937  | 6.49439  | 4.38367  | 1.95029  | intergenic               | ENSG00000178127          | 9102629-9134345          | + | -36094 |
| 18 | 9066421  | 9066650  | 230 | 9066580  | 6.87511  | 4.28345  | 2.27621  | intergenic               | ENSG00000178127          | 9102629-9134345          | + | -36094 |
| 18 | 9082824  | 9083183  | 360 | 9082937  | 6.49439  | 4.38367  | 1.95029  | intergenic               | ENSG00000178127          | 9102629-9134345          | + | -36094 |
| 18 | 9260571  | 9260808  | 238 | 9260640  | 4.71137  | 3.57074  | 0.70668  | ENSG00000101745:intron   | ENSG00000273284          | 9259387-9260390          | + | 1302   |
| 18 | 9427444  | 9427741  | 298 | 9427581  | 3.94601  | 3.20555  | 0.42361  | intergenic               | ENSG00000273335          | 9473420-9474006          | - | 46414  |
| 18 | 9473789  | 9474058  | 270 | 9474018  | 4.28414  | 3.30319  | 0.58986  | ENSG00000273335:Promoter | ENSG00000273335          | 9473420-9474006          | - | 83     |
| 18 | 9427444  | 9427741  | 298 | 9427581  | 3.94601  | 3.20555  | 0.42361  | r                        | ENSG0000017797:Promote   | ENSG00000273335          | - | 83     |
| 18 | 9427444  | 9427741  | 298 | 9427581  | 3.94601  | 3.20555  | 0.42361  | intergenic               | ENSG00000273335          | 9473420-9474006          | - | 46414  |

|    |          |          |     |          |          |          |          |                                                      |                 |                   |   |         |
|----|----------|----------|-----|----------|----------|----------|----------|------------------------------------------------------|-----------------|-------------------|---|---------|
| 18 | 9473789  | 9474058  | 270 | 9474018  | 4.28414  | 3.30319  | 0.58986  | ENSG00000273335:Promoter<br>;ENSG00000017797:Promote | ENSG00000273335 | 9473420-9474006   | - | 83      |
| 18 | 9524644  | 9524936  | 293 | 9524701  | 5.07624  | 3.80169  | 0.93914  | ENSG00000017797:exon                                 | ENSG00000251994 | 9518118-9518260   | - | -6529   |
| 18 | 10707006 | 10707497 | 492 | 10707378 | 6.49439  | 4.38367  | 1.95029  | ENSG00000264843:intron;E<br>NSG00000154864:intron    | ENSG00000264843 | 10704296-10709599 | + | 2955    |
| 18 | 10878779 | 10879028 | 250 | 10878887 | 11.51693 | 6.17716  | 6.39216  | ENSG00000154864:intron                               | ENSG00000263952 | 10893616-10908783 | + | -14713  |
| 18 | 10955467 | 10955745 | 279 | 10955658 | 4.36824  | 3.47775  | 0.59373  | ENSG00000154864:intron                               | ENSG00000263952 | 10893616-10908783 | + | 61989   |
| 18 | 11008057 | 11008365 | 309 | 11008142 | 3.77589  | 3.20345  | 0.30123  | ENSG00000154864:intron                               | ENSG00000263952 | 10893616-10908783 | + | 114594  |
| 18 | 10878779 | 10879028 | 250 | 10878887 | 11.51693 | 6.17716  | 6.39216  | ENSG00000154864:intron                               | ENSG00000263952 | 10893616-10908783 | + | -14713  |
| 18 | 10955467 | 10955745 | 279 | 10955658 | 4.36824  | 3.47775  | 0.59373  | ENSG00000154864:intron                               | ENSG00000263952 | 10893616-10908783 | + | 61989   |
| 18 | 11008057 | 11008365 | 309 | 11008142 | 3.77589  | 3.20345  | 0.30123  | ENSG00000154864:intron                               | ENSG00000263952 | 10893616-10908783 | + | 114594  |
| 18 | 22765712 | 22765960 | 249 | 22765879 | 4.76929  | 3.60726  | 0.74587  | ENSG00000265943:intron                               | ENSG00000101773 | 22798260-23026488 | + | -32424  |
| 18 | 23401803 | 23402059 | 257 | 23401959 | 4.9037   | 3.69224  | 0.82412  | ENSG00000134490:intron                               | ENSG00000134490 | 23197143-23437961 | - | 36030   |
| 18 | 24346317 | 24346546 | 230 | 24346375 | 6.98679  | 4.68837  | 2.37506  | ENSG00000141447:intron                               | ENSG00000264365 | 24364786-24367984 | + | -18355  |
| 18 | 26710539 | 26710770 | 232 | 26710663 | 7.17425  | 4.80518  | 2.52654  | intergenic                                           | ENSG00000265369 | 26687620-26703638 | - | -7016   |
| 18 | 30016689 | 30016947 | 259 | 30016793 | 4.56295  | 3.60388  | 0.59373  | intergenic                                           | ENSG00000283218 | 30298909-30298960 | + | -282091 |
| 18 | 30206545 | 30206748 | 204 | 30206614 | 4.1849   | 3.24157  | 0.52478  | intergenic                                           | ENSG00000283218 | 30298909-30298960 | + | -92263  |
| 18 | 30400049 | 30400362 | 314 | 30400243 | 6.26578  | 4.40475  | 1.75945  | intergenic                                           | ENSG00000283218 | 30298909-30298960 | + | 101296  |
| 18 | 32238192 | 32238412 | 221 | 32238285 | 4.56295  | 3.60388  | 0.59373  | intergenic                                           | ENSG00000263904 | 32245945-32249032 | - | 10730   |
| 18 | 33809005 | 33809305 | 301 | 33809088 | 4.56295  | 3.60388  | 0.59373  | intergenic                                           | ENSG00000199204 | 34001697-34001799 | - | 192644  |
| 18 | 34979048 | 34979467 | 420 | 34979192 | 5.34519  | 3.973    | 1.09512  | ENSG00000166974:intron                               | ENSG00000166974 | 34976927-35143470 | + | 2330    |
| 18 | 37316791 | 37317055 | 265 | 37316926 | 4.64049  | 3.52611  | 0.64891  | ENSG00000101489:intron                               | ENSG00000279678 | 37305294-37306333 | - | -10589  |
| 18 | 38911388 | 38911755 | 368 | 38911545 | 3.77589  | 3.20345  | 0.30123  | intergenic                                           | ENSG00000222704 | 39016046-39016344 | - | 104773  |
| 18 | 38912285 | 38912526 | 242 | 38912321 | 3.03786  | 2.80302  | 0.15111  | intergenic                                           | ENSG00000222704 | 39016046-39016344 | - | 103939  |
| 18 | 38940821 | 38941237 | 417 | 38941047 | 64.77042 | 17.53171 | 57.98073 | intergenic                                           | ENSG00000222704 | 39016046-39016344 | - | 75315   |
| 18 | 38954374 | 38954704 | 331 | 38954520 | 5.71883  | 4.06146  | 1.34558  | intergenic                                           | ENSG00000222704 | 39016046-39016344 | - | 61805   |
| 18 | 38911388 | 38911755 | 368 | 38911545 | 3.77589  | 3.20345  | 0.30123  | intergenic                                           | ENSG00000222704 | 39016046-39016344 | - | 104773  |
| 18 | 38912285 | 38912526 | 242 | 38912321 | 3.03786  | 2.80302  | 0.15111  | intergenic                                           | ENSG00000222704 | 39016046-39016344 | - | 103939  |
| 18 | 38940821 | 38941237 | 417 | 38941047 | 64.77042 | 17.53171 | 57.98073 | intergenic                                           | ENSG00000222704 | 39016046-39016344 | - | 75315   |
| 18 | 38954374 | 38954704 | 331 | 38954520 | 5.71883  | 4.06146  | 1.34558  | intergenic                                           | ENSG00000222704 | 39016046-39016344 | - | 61805   |
| 18 | 43244610 | 43244836 | 227 | 43244673 | 4.31475  | 3.20475  | 0.59373  | intergenic                                           | ENSG00000132872 | 43267877-43277650 | - | 32927   |
| 18 | 44041420 | 44041664 | 245 | 44041503 | 4.56295  | 3.60388  | 0.59373  | intergenic                                           | ENSG00000267716 | 44039470-44040140 | + | 2071    |
| 18 | 44709775 | 44710107 | 333 | 44709948 | 33.90416 | 12.197   | 27.85945 | ENSG00000152217:intron                               | ENSG00000280365 | 44732574-44733315 | + | -22633  |
| 18 | 44814105 | 44814413 | 309 | 44814195 | 4.84177  | 3.65305  | 0.77787  | ENSG00000152217:intron                               | ENSG00000280365 | 44732574-44733315 | + | 81684   |
| 18 | 44709775 | 44710107 | 333 | 44709948 | 33.90416 | 12.197   | 27.85945 | ENSG00000152217:intron                               | ENSG00000280365 | 44732574-44733315 | + | -22633  |
| 18 | 44814105 | 44814413 | 309 | 44814195 | 4.84177  | 3.65305  | 0.77787  | ENSG00000152217:intron                               | ENSG00000280365 | 44732574-44733315 | + | 81684   |
| 18 | 44851335 | 44851581 | 247 | 44851489 | 7.3143   | 4.5382   | 2.6406   | ENSG00000152217:intron                               | ENSG00000265957 | 44970081-44970166 | - | 118708  |
| 18 | 44953869 | 44954072 | 204 | 44954001 | 3.56795  | 3.06614  | 0.30123  | ENSG00000152217:intron                               | ENSG00000265957 | 44970081-44970166 | - | 16196   |
| 18 | 44969305 | 44969522 | 218 | 44969457 | 5.68188  | 3.88989  | 1.31322  | ENSG00000152217:intron                               | ENSG00000265957 | 44970081-44970166 | - | 753     |
| 18 | 48834718 | 48835028 | 311 | 48834881 | 10.16212 | 5.61542  | 5.15724  | ENSG00000267764:Promoter<br>:ENSG00000134030:intron  | ENSG00000267764 | 48826050-48834770 | - | -102    |
| 18 | 50080934 | 50081159 | 226 | 50081071 | 5.6497   | 4.01836  | 1.29426  | ENSG00000167306:intron                               | ENSG00000267511 | 50063794-50064440 | + | 17252   |
| 18 | 50131717 | 50131965 | 249 | 50131836 | 6.5896   | 4.44231  | 2.02209  | ENSG00000167306:intron                               | ENSG00000283343 | 50126498-50126563 | + | -5277   |
| 18 | 50875107 | 50875352 | 246 | 50875274 | 4.74614  | 3.46321  | 0.73612  | intergenic                                           | ENSG00000082212 | 50878733-50954257 | + | -3504   |
| 18 | 53642087 | 53642375 | 289 | 53642225 | 3.77589  | 3.20345  | 0.30123  | intergenic                                           | ENSG00000242945 | 53605253-53605725 | - | -36505  |
| 18 | 53689515 | 53689914 | 400 | 53689734 | 3.658    | 3.12558  | 0.30123  | intergenic                                           | ENSG00000242945 | 53605253-53605725 | - | -83989  |
| 18 | 53834868 | 53835163 | 296 | 53835059 | 4.56295  | 3.60388  | 0.59373  | intergenic                                           | ENSG00000242945 | 53605253-53605725 | - | -229290 |
| 18 | 53854454 | 53854686 | 233 | 53854647 | 3.658    | 3.12558  | 0.30123  | intergenic                                           | ENSG00000242945 | 53605253-53605725 | - | -248844 |
| 18 | 53642087 | 53642375 | 289 | 53642225 | 3.77589  | 3.20345  | 0.30123  | intergenic                                           | ENSG00000242945 | 53605253-53605725 | - | -36505  |
| 18 | 53689515 | 53689914 | 400 | 53689734 | 3.658    | 3.12558  | 0.30123  | intergenic                                           | ENSG00000242945 | 53605253-53605725 | - | -83989  |

|    |          |          |     |          |          |         |         |                                                             |                 |                   |   |         |
|----|----------|----------|-----|----------|----------|---------|---------|-------------------------------------------------------------|-----------------|-------------------|---|---------|
| 18 | 53834868 | 53835163 | 296 | 53835059 | 4.56295  | 3.60388 | 0.59373 | intergenic                                                  | ENSG00000242945 | 53605253-53605725 | - | -229290 |
| 18 | 53854454 | 53854686 | 233 | 53854647 | 3.658    | 3.12558 | 0.30123 | intergenic                                                  | ENSG00000242945 | 53605253-53605725 | - | -248844 |
| 18 | 54388827 | 54389057 | 231 | 54388928 | 8.62151  | 5.12271 | 3.79257 | intergenic                                                  | ENSG00000264350 | 54406888-54407114 | - | 18172   |
| 18 | 54717741 | 54718116 | 376 | 54717922 | 5.68188  | 3.88989 | 1.31322 | ENSG00000041353:five_pri<br>me_UTR;ENSG00000041353:e<br>xon | ENSG00000041353 | 54717859-54895516 | + | 69      |
| 18 | 54754058 | 54754267 | 210 | 54754124 | 3.77589  | 3.20345 | 0.30123 | ENSG00000041353:intron                                      | ENSG00000267524 | 54744749-54745581 | + | 9413    |
| 18 | 54769136 | 54769494 | 359 | 54769408 | 4.56295  | 3.60388 | 0.59373 | ENSG00000041353:intron                                      | ENSG00000267524 | 54744749-54745581 | + | 24565   |
| 18 | 56581661 | 56581917 | 257 | 56581742 | 7.17425  | 4.80518 | 2.52654 | intergenic                                                  | ENSG00000091157 | 56651342-57036606 | + | -69553  |
| 18 | 57044205 | 57044560 | 356 | 57044390 | 4.11517  | 3.31434 | 0.49781 | intergenic                                                  | ENSG00000267225 | 57027831-57038845 | + | 16551   |
| 18 | 57127960 | 57128197 | 238 | 57128137 | 3.55536  | 3.05783 | 0.30123 | intergenic                                                  | ENSG00000267789 | 57136321-57146998 | - | 18920   |
| 18 | 58426947 | 58427198 | 252 | 58427062 | 3.30549  | 2.89321 | 0.30123 | intergenic                                                  | ENSG00000267675 | 58416764-58417628 | + | 10308   |
| 18 | 58535500 | 58535747 | 248 | 58535705 | 5.06016  | 3.79147 | 0.9304  | ENSG00000198796:exon;ENS<br>G00000267257:intron             | ENSG00000267257 | 58535414-58538552 | + | 209     |
| 18 | 62027939 | 62028556 | 618 | 62028193 | 3.40931  | 2.96154 | 0.30123 | ENSG00000197563:intron                                      | ENSG00000267597 | 61957272-61958014 | - | -70233  |
| 18 | 63083726 | 63083931 | 206 | 63083871 | 3.02874  | 2.79685 | 0.15111 | intergenic                                                  | ENSG00000267766 | 63151113-63151320 | - | 67492   |
| 18 | 63084621 | 63084861 | 241 | 63084666 | 4.41276  | 3.50657 | 0.59373 | intergenic                                                  | ENSG00000267766 | 63151113-63151320 | - | 66579   |
| 18 | 63159546 | 63159857 | 312 | 63159801 | 3.12148  | 2.77238 | 0.20992 | ENSG00000171791:intron                                      | ENSG00000267766 | 63151113-63151320 | - | -8381   |
| 18 | 63161203 | 63161416 | 214 | 63161277 | 3.20396  | 2.64557 | 0.26167 | ENSG00000171791:intron                                      | ENSG00000267766 | 63151113-63151320 | - | -9989   |
| 18 | 63161748 | 63162043 | 296 | 63161909 | 11.02474 | 6.11671 | 5.94462 | ENSG00000171791:intron                                      | ENSG00000267766 | 63151113-63151320 | - | -10575  |
| 18 | 63083726 | 63083931 | 206 | 63083871 | 3.02874  | 2.79685 | 0.15111 | intergenic                                                  | ENSG00000267766 | 63151113-63151320 | - | 67492   |
| 18 | 63084621 | 63084861 | 241 | 63084666 | 4.41276  | 3.50657 | 0.59373 | intergenic                                                  | ENSG00000267766 | 63151113-63151320 | - | 66579   |
| 18 | 63159546 | 63159857 | 312 | 63159801 | 3.12148  | 2.77238 | 0.20992 | ENSG00000171791:intron                                      | ENSG00000267766 | 63151113-63151320 | - | -8381   |
| 18 | 63161203 | 63161416 | 214 | 63161277 | 3.20396  | 2.64557 | 0.26167 | ENSG00000171791:intron                                      | ENSG00000267766 | 63151113-63151320 | - | -9989   |
| 18 | 63161748 | 63162043 | 296 | 63161909 | 11.02474 | 6.11671 | 5.94462 | ENSG00000171791:intron                                      | ENSG00000267766 | 63151113-63151320 | - | -10575  |
| 18 | 64004761 | 64005111 | 351 | 64004940 | 5.96569  | 4.21594 | 1.54281 | ENSG00000166401:intron                                      | ENSG00000283667 | 63966405-63970181 | - | -34754  |
| 18 | 64157907 | 64158142 | 236 | 64158003 | 5.39424  | 4.00432 | 1.09512 | ENSG00000267134:intron                                      | ENSG00000179676 | 64080008-64149030 | - | -8994   |
| 18 | 64199046 | 64199277 | 232 | 64199135 | 5.14139  | 3.84312 | 0.98688 | ENSG00000266952:intron;E<br>NSG00000267134:intron           | ENSG00000179676 | 64080008-64149030 | - | -50131  |
| 18 | 66168164 | 66168449 | 286 | 66168352 | 5.39424  | 4.00432 | 1.09512 | intergenic                                                  | ENSG00000264685 | 66068749-66069647 | - | -98659  |
| 18 | 66847292 | 66847540 | 249 | 66847376 | 4.47325  | 3.54574 | 0.59373 | intergenic                                                  | ENSG00000238680 | 66946115-66946222 | + | -98699  |
| 18 | 68727602 | 68727817 | 216 | 68727661 | 4.919    | 3.70193 | 0.82412 | intergenic                                                  | ENSG00000276092 | 68721081-68721560 | + | 6628    |
| 18 | 69631527 | 69631965 | 439 | 69631674 | 6.26578  | 4.40475 | 1.75945 | ENSG00000206052:intron                                      | ENSG00000265643 | 69483626-69618694 | - | -13051  |
| 18 | 70194219 | 70194551 | 333 | 70194423 | 4.919    | 3.70193 | 0.82412 | ENSG00000176225:intron                                      | ENSG00000176225 | 70003030-70205945 | - | 11560   |
| 18 | 70736875 | 70737207 | 333 | 70737027 | 4.56295  | 3.60388 | 0.59373 | intergenic                                                  | ENSG00000263417 | 70630533-70650744 | - | -86296  |
| 18 | 70773867 | 70774100 | 234 | 70774011 | 4.1849   | 3.24157 | 0.52478 | intergenic                                                  | ENSG00000263417 | 70630533-70650744 | - | -123239 |
| 18 | 71989964 | 71990205 | 242 | 71990081 | 4.84177  | 3.65305 | 0.77787 | intergenic                                                  | ENSG00000265995 | 71890408-71944577 | - | -45507  |
| 18 | 71994111 | 71994335 | 225 | 71994161 | 3.77589  | 3.20345 | 0.30123 | intergenic                                                  | ENSG00000265995 | 71890408-71944577 | - | -49645  |
| 18 | 72181275 | 72181540 | 266 | 72181471 | 5.01585  | 3.49609 | 0.89533 | intergenic                                                  | ENSG00000265995 | 71890408-71944577 | - | -236830 |
| 18 | 71989964 | 71990205 | 242 | 71990081 | 4.84177  | 3.65305 | 0.77787 | intergenic                                                  | ENSG00000265995 | 71890408-71944577 | - | -45507  |
| 18 | 71994111 | 71994335 | 225 | 71994161 | 3.77589  | 3.20345 | 0.30123 | intergenic                                                  | ENSG00000265995 | 71890408-71944577 | - | -49645  |
| 18 | 72181275 | 72181540 | 266 | 72181471 | 5.01585  | 3.49609 | 0.89533 | intergenic                                                  | ENSG00000265995 | 71890408-71944577 | - | -236830 |
| 18 | 73396351 | 73396572 | 222 | 73396502 | 5.29302  | 3.93971 | 1.09512 | intergenic                                                  | ENSG00000261780 | 73324940-73349878 | + | 71521   |
| 18 | 74001455 | 74001730 | 276 | 74001483 | 4.21084  | 3.37603 | 0.54478 | ENSG00000263655:intron                                      | ENSG00000263655 | 73914404-74034161 | - | 32569   |
| 18 | 77905538 | 77905743 | 206 | 77905681 | 3.49438  | 2.91742 | 0.30123 | intergenic                                                  | ENSG00000252260 | 77863463-77863567 | - | -42073  |
| 18 | 77910333 | 77910582 | 250 | 77910513 | 5.39424  | 4.00432 | 1.09512 | intergenic                                                  | ENSG00000252260 | 77863463-77863567 | - | -46890  |
| 18 | 79300327 | 79300645 | 319 | 79300459 | 5.39424  | 4.00432 | 1.09512 | ENSG00000166377:intron                                      | ENSG00000267015 | 79340257-79343972 | - | 43486   |
| 18 | 79325500 | 79325730 | 231 | 79325566 | 4.56295  | 3.60388 | 0.59373 | ENSG00000166377:intron                                      | ENSG00000267015 | 79340257-79343972 | - | 18357   |
| 19 | 2865860  | 2866087  | 228 | 2865952  | 5.968    | 3.64162 | 1.54447 | ENSG00000172000:Promoter                                    | ENSG00000172000 | 2867334-2883445   | + | -1361   |
| 19 | 3435154  | 3435417  | 264 | 3435278  | 13.45783 | 4.60431 | 8.16847 | ENSG00000141905:intron                                      | ENSG00000095932 | 3473985-3480542   | - | 45257   |
| 19 | 7080293  | 7080623  | 331 | 7080611  | 5.39672  | 3.71993 | 1.09738 | ENSG00000130544:intron                                      | ENSG00000130544 | 7069443-7087968   | + | 11014   |



|    |          |          |     |          |          |          |          |                                                      |                 |                   |   |         |
|----|----------|----------|-----|----------|----------|----------|----------|------------------------------------------------------|-----------------|-------------------|---|---------|
| 19 | 7147324  | 7147540  | 217 | 7147429  | 8.23437  | 4.24593  | 3.43385  | ENSG00000171105:intron                               | ENSG00000130544 | 7069443-7087968   | + | 77988   |
| 19 | 10412285 | 10412509 | 225 | 10412431 | 5.84361  | 3.7038   | 1.44168  | ENSG00000105401:intron                               | ENSG00000065989 | 10416772-10469631 | + | -4375   |
| 19 | 10615048 | 10615302 | 255 | 10615066 | 4.91514  | 3.56573  | 0.82412  | ENSG00000129353:intron                               | ENSG00000129353 | 10602456-10644559 | + | 12718   |
| 19 | 11536001 | 11536237 | 237 | 11536179 | 7.01358  | 3.67516  | 2.39889  | intergenic                                           | ENSG00000130176 | 11538716-11550323 | + | -2597   |
| 19 | 11987929 | 11988152 | 224 | 11988042 | 5.11088  | 3.68528  | 0.9653   | ENSG00000219665:intron                               | ENSG00000219665 | 11987616-12046275 | + | 424     |
| 19 | 13323335 | 13323582 | 248 | 13323463 | 4.56295  | 3.60388  | 0.59373  | ENSG00000141837:intron                               | ENSG00000213253 | 13157958-13158788 | - | -164670 |
| 19 | 13516477 | 13516747 | 271 | 13516588 | 4.42776  | 3.51628  | 0.59373  | intergenic                                           | ENSG00000141837 | 13206441-13633025 | - | 116413  |
| 19 | 14006864 | 14007087 | 224 | 14006998 | 5.13473  | 3.43925  | 0.98202  | ENSG00000132005:Promoter                             | ENSG00000132005 | 13961537-14007039 | - | 64      |
| 19 | 15688036 | 15688312 | 277 | 15688175 | 4.56295  | 3.60388  | 0.59373  | ENSG00000186204:intron                               | ENSG00000186204 | 15672756-15697174 | + | 15417   |
| 19 | 15883587 | 15883838 | 252 | 15883644 | 5.74381  | 3.92704  | 1.36222  | ENSG00000186115:intron                               | ENSG00000273330 | 15871666-15871852 | - | -11860  |
| 19 | 16929174 | 16929434 | 261 | 16929234 | 8.28323  | 5.11428  | 3.47693  | ENSG00000160111:exon                                 | ENSG00000263595 | 16910489-16910784 | - | -18519  |
| 19 | 17135500 | 17135786 | 287 | 17135612 | 9.5439   | 5.46423  | 4.61247  | ENSG00000099331:intron                               | ENSG00000268056 | 17152587-17168051 | - | 32408   |
| 19 | 18225622 | 18226063 | 442 | 18226059 | 4.18632  | 3.24245  | 0.52565  | ENSG00000285188:intron;E<br>NSG00000105650:intron    | ENSG00000268650 | 18204729-18220480 | + | 21113   |
| 19 | 20267006 | 20267435 | 430 | 20267205 | 5.39424  | 4.00432  | 1.09512  | ENSG00000269055:Promoter<br>:ENSG00000267383:intron  | ENSG00000269055 | 20267816-20268391 | + | -596    |
| 19 | 23359332 | 23359569 | 238 | 23359388 | 4.76929  | 3.60726  | 0.74587  | ENSG00000167232:intron                               | ENSG00000269431 | 23380316-23380876 | + | -20866  |
| 19 | 27672527 | 27672744 | 218 | 27672619 | 6.49439  | 4.38367  | 1.95029  | intergenic                                           | ENSG00000267696 | 27638482-27646483 | - | -26152  |
| 19 | 30030892 | 30031113 | 222 | 30031002 | 3.69765  | 3.15177  | 0.30123  | ENSG00000267006:Promoter                             | ENSG00000267006 | 30028740-30029916 | - | -1086   |
| 19 | 32514374 | 32514737 | 364 | 32514497 | 4.16942  | 3.34931  | 0.52478  | intergenic                                           | ENSG00000105185 | 32581067-32587452 | + | -66512  |
| 19 | 33051592 | 33051875 | 284 | 33051727 | 3.34993  | 2.92244  | 0.30123  | ENSG00000131941:intron                               | ENSG00000267611 | 33051514-33051701 | + | 219     |
| 19 | 34722586 | 34722815 | 230 | 34722715 | 4.84177  | 3.65305  | 0.77787  | intergenic                                           | ENSG00000274104 | 34733297-34733837 | - | 11137   |
| 19 | 37426568 | 37426863 | 296 | 37426804 | 3.03786  | 2.80302  | 0.15111  | ENSG00000196437:intron                               | ENSG00000279936 | 37401403-37403846 | - | -22869  |
| 19 | 37429651 | 37429901 | 251 | 37429701 | 3.77589  | 3.20345  | 0.30123  | ENSG00000196437:intron                               | ENSG00000279936 | 37401403-37403846 | - | -25929  |
| 19 | 39073466 | 39073910 | 445 | 39073789 | 6.51641  | 4.07877  | 1.96373  | intergenic                                           | ENSG00000183760 | 39083912-39111493 | + | -10224  |
| 19 | 39403852 | 39404080 | 229 | 39404002 | 11.58561 | 4.50718  | 6.45179  | intergenic                                           | ENSG00000128016 | 39406812-39409412 | + | -2846   |
| 19 | 41087847 | 41088099 | 253 | 41087924 | 5.01585  | 3.49609  | 0.89533  | ENSG00000197838:Promoter                             | ENSG00000197838 | 41088471-41096195 | + | -498    |
| 19 | 42209083 | 42209391 | 309 | 42209351 | 4.14216  | 3.33173  | 0.51073  | ENSG00000160570:intron<br>ENSG00000186567:exon;ENS   | ENSG00000160570 | 42198597-42220140 | - | 10903   |
| 19 | 44671386 | 44671648 | 263 | 44671599 | 4.47325  | 3.54574  | 0.59373  | G00000186567:five_prime_<br>UTR;ENSG00000266903:intr | ENSG00000279095 | 44664130-44666158 | + | 7386    |
| 19 | 46160935 | 46161199 | 265 | 46161054 | 6.22868  | 4.22079  | 1.75945  | ENSG00000204866:intron;E<br>NSG00000267922:intron    | ENSG00000204866 | 46143105-46161299 | + | 17961   |
| 19 | 47241083 | 47241351 | 269 | 47241228 | 9.05733  | 4.35472  | 4.17411  | intergenic                                           | ENSG00000105327 | 47220821-47232766 | - | -8450   |
| 19 | 48978873 | 48979165 | 293 | 48978950 | 23.13206 | 10.02345 | 17.39519 | ENSG00000104812:intron                               | ENSG00000087086 | 48965300-48966878 | + | 13718   |
| 19 | 51955631 | 51955924 | 294 | 51955899 | 4.28127  | 3.42152  | 0.58762  | ENSG00000269235:intron<br>ENSG00000160505:exon;ENS   | ENSG00000269235 | 51949133-51981367 | + | 6644    |
| 19 | 55881576 | 55881841 | 266 | 55881737 | 4.56295  | 3.60388  | 0.59373  | G00000160505:three_prime<br>UTR                      | ENSG00000179873 | 55785396-55836800 | - | -44908  |
| 19 | 57283285 | 57283500 | 216 | 57283426 | 6.36907  | 4.30669  | 1.85528  | ENSG00000197714:intron                               | ENSG00000267871 | 57267219-57280334 | - | -3058   |
| 19 | 57472620 | 57473034 | 415 | 57472797 | 4.56295  | 3.60388  | 0.59373  | ENSG00000268163:intron;E<br>NSG00000197128:intron    | ENSG00000268163 | 57437969-57477536 | - | 4709    |
| 2  | 783906   | 784202   | 297 | 783972   | 4.56295  | 3.60388  | 0.59373  | ENSG00000237667:intron                               | ENSG00000223751 | 742487-747767     | + | 41566   |
| 2  | 8031942  | 8032169  | 228 | 8032000  | 4.94982  | 3.72146  | 0.84841  | ENSG00000235665:intron;E<br>NSG00000236790:intron    | ENSG00000229740 | 8139401-8143269   | + | -107346 |
| 2  | 8115464  | 8115668  | 205 | 8115561  | 3.88371  | 3.16559  | 0.37576  | ENSG00000236790:intron;E<br>NSG00000235665:intron    | ENSG00000229740 | 8139401-8143269   | + | -23835  |
| 2  | 8302034  | 8302308  | 275 | 8302197  | 18.22361 | 8.18134  | 12.65373 | ENSG00000236790:intron                               | ENSG00000235665 | 7922424-8278084   | - | -24086  |
| 2  | 8966862  | 8967166  | 305 | 8966934  | 4.14216  | 3.33173  | 0.51073  | ENSG00000143797:intron                               | ENSG00000143797 | 8852689-9003813   | - | 36799   |
| 2  | 9914718  | 9915003  | 286 | 9914833  | 8.17554  | 4.86236  | 3.38452  | ENSG00000115750:intron                               | ENSG00000269973 | 9936359-9939590   | + | -21499  |

|   |          |          |     |          |          |         |          |                          |                 |                   |   |         |
|---|----------|----------|-----|----------|----------|---------|----------|--------------------------|-----------------|-------------------|---|---------|
| 2 | 10852156 | 10852408 | 253 | 10852372 | 3.49438  | 2.91742 | 0.30123  | ENSG00000232056:intron   | ENSG00000232056 | 10847576-10854955 | + | 4705    |
| 2 | 11260150 | 11260369 | 220 | 11260191 | 3.69765  | 3.15177 | 0.30123  | ENSG00000134318:intron   | ENSG00000207267 | 11233987-11234094 | + | 26272   |
| 2 | 11754294 | 11754535 | 242 | 11754412 | 8.49733  | 4.52572 | 3.67671  | ENSG00000134324:intron   | ENSG00000230790 | 11740996-11745301 | - | -9113   |
| 2 | 11830285 | 11830561 | 277 | 11830395 | 16.55362 | 7.28351 | 11.05902 | intergenic               | ENSG00000265172 | 11836932-11836986 | - | 6563    |
| 2 | 12460526 | 12460747 | 222 | 12460726 | 3.77589  | 3.20345 | 0.30123  | ENSG00000224184:intron   | ENSG00000207183 | 12411397-12411501 | - | -49135  |
| 2 | 12501529 | 12501787 | 259 | 12501610 | 6.21114  | 4.3703  | 1.75228  | ENSG00000224184:intron   | ENSG00000207183 | 12411397-12411501 | - | -90156  |
| 2 | 13432247 | 13432614 | 368 | 13432440 | 5.68188  | 3.88989 | 1.31322  | intergenic               | ENSG00000229370 | 13537672-13609168 | + | -105242 |
| 2 | 13523239 | 13523525 | 287 | 13523377 | 16.55362 | 7.28351 | 11.05902 | intergenic               | ENSG00000229370 | 13537672-13609168 | + | -14290  |
| 2 | 13432247 | 13432614 | 368 | 13432440 | 5.68188  | 3.88989 | 1.31322  | intergenic               | ENSG00000229370 | 13537672-13609168 | + | -105242 |
| 2 | 13523239 | 13523525 | 287 | 13523377 | 16.55362 | 7.28351 | 11.05902 | intergenic               | ENSG00000229370 | 13537672-13609168 | + | -14290  |
| 2 | 13666961 | 13667214 | 254 | 13667009 | 4.84177  | 3.65305 | 0.77787  | intergenic               | ENSG00000227718 | 13723047-13758152 | + | -55960  |
| 2 | 13792839 | 13793060 | 222 | 13792973 | 4.35356  | 3.46825 | 0.59373  | ENSG00000230448:intron   | ENSG00000227718 | 13723047-13758152 | + | 69902   |
| 2 | 13666961 | 13667214 | 254 | 13667009 | 4.84177  | 3.65305 | 0.77787  | intergenic               | ENSG00000227718 | 13723047-13758152 | + | -55960  |
| 2 | 13792839 | 13793060 | 222 | 13792973 | 4.35356  | 3.46825 | 0.59373  | ENSG00000230448:intron   | ENSG00000227718 | 13723047-13758152 | + | 69902   |
| 2 | 15984511 | 15984808 | 298 | 15984678 | 3.64836  | 3.01523 | 0.30123  | intergenic               | ENSG00000243541 | 15950688-15950981 | - | -33678  |
| 2 | 17255920 | 17256223 | 304 | 17255990 | 4.56295  | 3.60388 | 0.59373  | intergenic               | ENSG00000214843 | 17284291-17284895 | + | -28220  |
| 2 | 17303094 | 17303388 | 295 | 17303255 | 7.95772  | 5.10736 | 3.21843  | intergenic               | ENSG00000214843 | 17284291-17284895 | + | 18949   |
| 2 | 17626923 | 17627205 | 283 | 17626977 | 6.09579  | 4.29768 | 1.6498   | ENSG00000163032:intron   | ENSG00000163032 | 17539125-17657018 | + | 87938   |
| 2 | 17813763 | 17814063 | 301 | 17813893 | 6.22868  | 4.22079 | 1.75945  | intergenic               | ENSG00000151379 | 17816495-17817101 | + | -2582   |
| 2 | 17927829 | 17928044 | 216 | 17927874 | 3.64493  | 3.11695 | 0.30123  | ENSG00000170745:intron   | ENSG00000170745 | 17877846-18361616 | + | 50090   |
| 2 | 20929877 | 20930103 | 227 | 20930060 | 4.68282  | 3.55276 | 0.68513  | intergenic               | ENSG00000236436 | 20859770-20861661 | + | 70219   |
| 2 | 21108093 | 21108303 | 211 | 21108163 | 7.3143   | 4.5382  | 2.6406   | intergenic               | ENSG00000218819 | 21123916-21143272 | + | -15718  |
| 2 | 22716230 | 22716502 | 273 | 22716295 | 3.77589  | 3.20345 | 0.30123  | intergenic               | ENSG00000222616 | 22861551-22861884 | + | -145185 |
| 2 | 22947302 | 22947545 | 244 | 22947527 | 4.56295  | 3.60388 | 0.59373  | intergenic               | ENSG00000222616 | 22861551-22861884 | + | 85872   |
| 2 | 22714536 | 22714804 | 269 | 22714626 | 4.81345  | 3.63515 | 0.77787  | intergenic               | ENSG00000283031 | 23667207-23685453 | - | -29216  |
| 2 | 26068627 | 26068935 | 309 | 26068758 | 6.24595  | 4.23134 | 1.75945  | ENSG00000084733:intron   | ENSG00000199872 | 26042674-26042781 | + | 26106   |
| 2 | 28332928 | 28333314 | 387 | 28333070 | 6.26578  | 4.40475 | 1.75945  | ENSG00000158019:intron   | ENSG00000223522 | 28307690-28310459 | - | -22661  |
| 2 | 28392713 | 28392999 | 287 | 28392845 | 9.86288  | 4.19314 | 4.89167  | ENSG00000075426:intron;E | ENSG00000075426 | 28392447-28417312 | + | 408     |
|   |          |          |     |          |          |         |          | NSG00000229951:intron    |                 |                   |   |         |
|   |          |          |     |          |          |         |          | ENSG00000172954:three_pr |                 |                   |   |         |
| 2 | 30640606 | 30641015 | 410 | 30640622 | 4.51948  | 3.5757  | 0.59373  | ime_UTR;ENSG00000172954: | ENSG00000278908 | 30677761-30679895 | + | -36951  |
|   |          |          |     |          |          |         |          | exon                     |                 |                   |   |         |
| 2 | 31249113 | 31249357 | 245 | 31249280 | 5.92936  | 4.19316 | 1.51421  | ENSG00000013016:intron   | ENSG00000013016 | 31234336-31269447 | + | 14898   |
| 2 | 32418180 | 32418457 | 278 | 32418275 | 4.12863  | 3.32301 | 0.50868  | ENSG00000115760:intron   | ENSG00000230046 | 32377630-32379599 | - | -38719  |
| 2 | 33186804 | 33187118 | 315 | 33186965 | 7.00771  | 4.7014  | 2.39483  | ENSG00000049323:exon     | ENSG00000285577 | 33274464-33281261 | - | 94300   |
| 2 | 36492372 | 36492696 | 325 | 36492482 | 3.03786  | 2.80302 | 0.15111  | ENSG00000150938:intron   | ENSG00000273090 | 36513254-36513732 | - | 21198   |
| 2 | 36516461 | 36516734 | 274 | 36516676 | 4.56295  | 3.60388 | 0.59373  | ENSG00000150938:intron   | ENSG00000273090 | 36513254-36513732 | - | -2865   |
| 2 | 37131455 | 37131675 | 221 | 37131555 | 4.70801  | 3.44018 | 0.70461  | ENSG00000055332:intron   | ENSG00000224891 | 37148529-37149304 | + | -16964  |
| 2 | 39128961 | 39129284 | 324 | 39129087 | 7.74622  | 4.7928  | 3.02341  | ENSG00000202309:Promoter | ENSG00000202309 | 39128825-39128927 | - | -195    |
| 2 | 43293878 | 43294168 | 291 | 43293997 | 5.40704  | 3.35205 | 1.10135  | ENSG00000115970:intron   | ENSG00000234936 | 43229572-43233394 | + | 64450   |
| 2 | 45453922 | 45454196 | 275 | 45454078 | 4.56295  | 3.60388 | 0.59373  | ENSG00000068784:intron   | ENSG00000239396 | 45569198-45569492 | - | 115433  |
| 2 | 45869853 | 45870152 | 300 | 45870076 | 3.88371  | 3.16559 | 0.37576  | ENSG00000171132:intron   | ENSG00000233829 | 46003941-46004309 | - | 134307  |
| 2 | 46413195 | 46413513 | 319 | 46413355 | 5.75051  | 3.78743 | 1.36222  | intergenic               | ENSG00000187600 | 46429189-46441833 | + | -15835  |
| 2 | 46493550 | 46493825 | 276 | 46493713 | 11.57675 | 5.57827 | 6.44432  | ENSG00000250565:intron   | ENSG00000253515 | 46499730-46501278 | + | -6043   |
| 2 | 46500238 | 46500449 | 212 | 46500320 | 4.31475  | 3.20475 | 0.59373  | ENSG00000250565:intron;E | ENSG00000253515 | 46499730-46501278 | + | 613     |
|   |          |          |     |          |          |         |          | NSG00000253515:intron    |                 |                   |   |         |
| 2 | 46909773 | 46910555 | 783 | 46909927 | 17.58419 | 7.57485 | 12.04595 | ENSG00000180398:intron   | ENSG00000068724 | 46916156-47076137 | + | -5992   |
| 2 | 46985181 | 46985449 | 269 | 46985323 | 4.60755  | 3.1497  | 0.62762  | ENSG00000068724:intron   | ENSG00000272814 | 46956614-46956888 | - | -28426  |
|   |          |          |     |          |          |         |          | ENSG00000242441:intron;E |                 |                   |   |         |
| 2 | 48669963 | 48670214 | 252 | 48670197 | 3.49438  | 2.91742 | 0.30123  | NSG00000068781:intron;EN | ENSG00000239995 | 48632855-48633353 | - | -36735  |
|   |          |          |     |          |          |         |          | SG00000279956:intron     |                 |                   |   |         |

|   |          |          |     |          |           |          |           |                                                   |                 |                   |   |         |
|---|----------|----------|-----|----------|-----------|----------|-----------|---------------------------------------------------|-----------------|-------------------|---|---------|
| 2 | 48997375 | 48997599 | 225 | 48997465 | 4. 50398  | 3. 56566 | 0. 59373  | ENSG00000282890:intron;E<br>NSG00000170820:intron | ENSG00000212036 | 49059602-49059658 | + | -62115  |
| 2 | 49042341 | 49042575 | 235 | 49042476 | 3. 03786  | 2. 80302 | 0. 15111  | ENSG00000282890:intron;E<br>NSG00000170820:intron | ENSG00000212036 | 49059602-49059658 | + | -17144  |
| 2 | 49055511 | 49055808 | 298 | 49055620 | 7. 17425  | 4. 80518 | 2. 52654  | ENSG00000282890:intron;E<br>NSG00000170820:intron | ENSG00000212036 | 49059602-49059658 | + | -3943   |
| 2 | 49579961 | 49580285 | 325 | 49580136 | 5. 39424  | 4. 00432 | 1. 09512  | ENSG00000282828:intron                            | ENSG00000282828 | 49563397-49595122 | + | 16725   |
| 2 | 49728112 | 49728350 | 239 | 49728280 | 3. 77589  | 3. 20345 | 0. 30123  | intergenic                                        | ENSG00000234253 | 49878622-49879363 | + | -150391 |
| 2 | 50229929 | 50230190 | 262 | 50230091 | 3. 77589  | 3. 20345 | 0. 30123  | ENSG00000179915:intron                            | ENSG00000285548 | 50324642-50345598 | + | -94583  |
| 2 | 50294648 | 50294902 | 255 | 50294678 | 3. 34993  | 2. 92244 | 0. 30123  | ENSG00000179915:intron                            | ENSG00000285548 | 50324642-50345598 | + | -29867  |
| 2 | 53964698 | 53964915 | 218 | 53964785 | 4. 11506  | 3. 19834 | 0. 49781  | ENSG00000068878:intron                            | ENSG00000170634 | 53970837-54305300 | + | -6031   |
| 2 | 54093178 | 54093414 | 237 | 54093326 | 5. 0124   | 3. 76115 | 0. 89533  | ENSG00000170634:intron                            | ENSG00000272156 | 54082553-54085066 | + | 10742   |
| 2 | 55050466 | 55050693 | 228 | 55050565 | 8. 2371   | 4. 24725 | 3. 43644  | ENSG00000115310:intron                            | ENSG00000200086 | 55014417-55014521 | - | -36058  |
| 2 | 56934917 | 56935198 | 282 | 56934986 | 5. 39424  | 4. 00432 | 1. 09512  | intergenic                                        | ENSG00000271115 | 57048349-57049336 | - | 114279  |
| 2 | 61708104 | 61708336 | 233 | 61708227 | 5. 56876  | 3. 96799 | 1. 238    | intergenic                                        | ENSG00000213486 | 61710075-61710978 | - | 2758    |
| 2 | 62306722 | 62306950 | 229 | 62306868 | 5. 75051  | 3. 78743 | 1. 36222  | intergenic                                        | ENSG00000270335 | 62348947-62350739 | - | 43903   |
| 2 | 62403890 | 62404108 | 219 | 62404079 | 3. 77589  | 3. 20345 | 0. 30123  | intergenic                                        | ENSG00000270335 | 62348947-62350739 | - | -53259  |
| 2 | 62306722 | 62306950 | 229 | 62306868 | 5. 75051  | 3. 78743 | 1. 36222  | intergenic                                        | ENSG00000270335 | 62348947-62350739 | - | 43903   |
| 2 | 62403890 | 62404108 | 219 | 62404079 | 3. 77589  | 3. 20345 | 0. 30123  | intergenic                                        | ENSG00000270335 | 62348947-62350739 | - | -53259  |
| 2 | 62569787 | 62570021 | 235 | 62569863 | 3. 34993  | 2. 92244 | 0. 30123  | intergenic                                        | ENSG00000230595 | 62561057-62561423 | - | -8480   |
| 2 | 62656268 | 62656506 | 239 | 62656406 | 5. 27581  | 3. 92874 | 1. 08581  | ENSG00000226622:intron                            | ENSG00000226622 | 62590254-62662654 | - | 6267    |
| 2 | 63868485 | 63868702 | 218 | 63868627 | 4. 82831  | 3. 64454 | 0. 77787  | ENSG00000169764:intron                            | ENSG00000251775 | 63883248-63883391 | - | 14798   |
| 2 | 64062884 | 64063121 | 238 | 64062985 | 8. 17554  | 4. 86236 | 3. 38452  | intergenic                                        | ENSG00000228079 | 64086352-64088246 | - | 25244   |
| 2 | 64114101 | 64114323 | 223 | 64114208 | 6. 4824   | 4. 21404 | 1. 94623  | ENSG00000197329:intron                            | ENSG00000228079 | 64086352-64088246 | - | -25965  |
| 2 | 64558356 | 64558719 | 364 | 64558596 | 3. 02441  | 2. 62206 | 0. 15111  | ENSG00000119844:intron                            | ENSG00000252414 | 64578891-64578997 | + | -20354  |
| 2 | 65167127 | 65167358 | 232 | 65167215 | 4. 81345  | 3. 63515 | 0. 77787  | intergenic                                        | ENSG00000272025 | 65158661-65158860 | + | 8581    |
| 2 | 67290617 | 67290829 | 213 | 67290714 | 3. 03786  | 2. 80302 | 0. 15111  | ENSG00000235885:intron                            | ENSG00000236605 | 67324626-67325304 | + | -33903  |
| 2 | 67346627 | 67346878 | 252 | 67346695 | 4. 00982  | 3. 24654 | 0. 45978  | intergenic                                        | ENSG00000236605 | 67324626-67325304 | + | 22126   |
| 2 | 67463830 | 67464300 | 471 | 67464037 | 15. 49818 | 8. 00863 | 10. 06014 | intergenic                                        | ENSG00000143971 | 67397318-67412089 | + | 66746   |
| 2 | 68516383 | 68516626 | 244 | 68516489 | 3. 77589  | 3. 20345 | 0. 30123  | ENSG00000169621:intron                            | ENSG00000214525 | 68528240-68529452 | - | 12948   |
| 2 | 68550956 | 68551238 | 283 | 68551150 | 3. 69765  | 3. 15177 | 0. 30123  | ENSG00000169621:intron                            | ENSG00000214525 | 68528240-68529452 | - | -21644  |
| 2 | 68832607 | 68832903 | 297 | 68832712 | 9. 5439   | 5. 46423 | 4. 61247  | ENSG00000237576:intron                            | ENSG00000237576 | 68832043-68837724 | + | 711     |
| 2 | 74593756 | 74593990 | 235 | 74593930 | 4. 26704  | 3. 41232 | 0. 58491  | ENSG00000159374:intron                            | ENSG00000233872 | 74618855-74620979 | - | 27106   |
| 2 | 75747653 | 75748069 | 417 | 75748038 | 4. 56295  | 3. 60388 | 0. 59373  | intergenic                                        | ENSG00000270996 | 75719119-75720018 | + | 28741   |
| 2 | 75778764 | 75779058 | 295 | 75778904 | 4. 56295  | 3. 60388 | 0. 59373  | intergenic                                        | ENSG00000270996 | 75719119-75720018 | + | 59791   |
| 2 | 83884496 | 83884763 | 268 | 83884640 | 4. 56295  | 3. 60388 | 0. 59373  | intergenic                                        | ENSG00000228225 | 84031139-84032358 | + | -146510 |
| 2 | 83943262 | 83943496 | 235 | 83943393 | 4. 84177  | 3. 65305 | 0. 77787  | intergenic                                        | ENSG00000228225 | 84031139-84032358 | + | -87760  |
| 2 | 85930746 | 85931030 | 285 | 85931003 | 4. 61259  | 3. 50857 | 0. 63149  | intergenic                                        | ENSG00000115525 | 85837119-85905199 | - | -25688  |
| 2 | 85999318 | 85999570 | 253 | 85999452 | 5. 01585  | 3. 49609 | 0. 89533  | intergenic                                        | ENSG00000115525 | 85837119-85905199 | - | -94244  |
| 2 | 85930746 | 85931030 | 285 | 85931003 | 4. 61259  | 3. 50857 | 0. 63149  | intergenic                                        | ENSG00000115525 | 85837119-85905199 | - | -25688  |
| 2 | 85999318 | 85999570 | 253 | 85999452 | 5. 01585  | 3. 49609 | 0. 89533  | intergenic                                        | ENSG00000115525 | 85837119-85905199 | - | -94244  |
| 2 | 86251337 | 86251613 | 277 | 86251433 | 3. 45699  | 2. 99296 | 0. 30123  | ENSG00000068615:intron                            | ENSG00000132313 | 86199354-86213794 | + | 52120   |
| 2 | 86486854 | 86487071 | 218 | 86487029 | 3. 88371  | 3. 16559 | 0. 37576  | ENSG00000115548:intron                            | ENSG00000200563 | 86515203-86515308 | - | 28346   |
| 2 | 88119036 | 88119301 | 266 | 88119152 | 6. 19436  | 4. 19984 | 1. 73845  | intergenic                                        | ENSG00000163586 | 88122981-88128116 | - | 8948    |
| 2 | 88182674 | 88182895 | 222 | 88182829 | 4. 68282  | 3. 55276 | 0. 68513  | ENSG00000144115:exon                              | ENSG00000144115 | 88170294-88186636 | + | 12490   |
| 2 | 88259914 | 88260166 | 253 | 88260024 | 4. 69706  | 3. 56173 | 0. 69764  | intergenic                                        | ENSG00000144115 | 88170294-88186636 | + | 89745   |
| 2 | 88182674 | 88182895 | 222 | 88182829 | 4. 68282  | 3. 55276 | 0. 68513  | ENSG00000144115:exon                              | ENSG00000144115 | 88170294-88186636 | + | 12490   |
| 2 | 88259914 | 88260166 | 253 | 88260024 | 4. 69706  | 3. 56173 | 0. 69764  | intergenic                                        | ENSG00000144115 | 88170294-88186636 | + | 89745   |
| 2 | 88600042 | 88600474 | 433 | 88600301 | 12. 43382 | 5. 82026 | 7. 22732  | ENSG00000172071:intron                            | ENSG00000234028 | 88627538-88631821 | + | -27280  |
| 2 | 94291509 | 94291871 | 363 | 94291644 | 3. 77589  | 3. 20345 | 0. 30123  | intergenic                                        | ENSG00000261522 | 94575975-94587183 | - | 295493  |
| 2 | 95159229 | 95159548 | 320 | 95159478 | 4. 23481  | 3. 27254 | 0. 56211  | ENSG00000144026:intron                            | ENSG00000144026 | 95147329-95165413 | - | 6025    |

|   |           |           |     |           |          |          |          |                          |                 |                     |   |         |
|---|-----------|-----------|-----|-----------|----------|----------|----------|--------------------------|-----------------|---------------------|---|---------|
| 2 | 96333768  | 96333987  | 220 | 96333885  | 3.95541  | 3.09995  | 0.4326   | ENSG00000121152:Promoter | ENSG00000121152 | 96335786-96373845   | + | -1909   |
| 2 | 97048568  | 97048803  | 236 | 97048712  | 5.39424  | 4.00432  | 1.09512  | intergenic               | ENSG00000271402 | 97050728-97051028   | + | -2043   |
| 2 | 97111178  | 97111477  | 300 | 97111254  | 5.39424  | 4.00432  | 1.09512  | intergenic               | ENSG00000135976 | 97113495-97250199   | + | -2168   |
| 2 | 97111178  | 97111477  | 300 | 97111254  | 5.39424  | 4.00432  | 1.09512  | intergenic               | ENSG00000135976 | 97113495-97250199   | + | -2168   |
| 2 | 97821534  | 97821857  | 324 | 97821739  | 4.78394  | 3.61651  | 0.75881  | ENSG00000075568:intron   | ENSG00000235734 | 97827247-97827545   | + | -5552   |
| 2 | 98711718  | 98711978  | 261 | 98711824  | 4.16942  | 3.34931  | 0.52478  | ENSG00000071073:intron   | ENSG00000236564 | 98694108-98695490   | + | 17739   |
| 2 | 101622317 | 101622626 | 310 | 101622395 | 3.34993  | 2.92244  | 0.30123  | intergenic               | ENSG00000071054 | 101696849-101894689 | + | -74378  |
| 2 | 104343507 | 104343723 | 217 | 104343586 | 4.76929  | 3.60726  | 0.74587  | intergenic               | ENSG00000233955 | 104395001-104396280 | - | 52665   |
| 2 | 107027234 | 107027546 | 313 | 107027421 | 4.56295  | 3.60388  | 0.59373  | intergenic               | ENSG00000226905 | 106963192-106963674 | + | 64197   |
| 2 | 107089611 | 107089919 | 309 | 107089653 | 4.56295  | 3.60388  | 0.59373  | intergenic               | ENSG00000226905 | 106963192-106963674 | + | 126572  |
| 2 | 107279166 | 107279389 | 224 | 107279193 | 3.77589  | 3.20345  | 0.30123  | ENSG00000229457:intron   | ENSG00000225588 | 107362281-107407329 | + | -83004  |
| 2 | 107303890 | 107304225 | 336 | 107304084 | 3.34993  | 2.92244  | 0.30123  | ENSG00000229457:intron   | ENSG00000225588 | 107362281-107407329 | + | -58224  |
| 2 | 107414443 | 107414938 | 496 | 107414770 | 5.39424  | 4.00432  | 1.09512  | ENSG00000237880:intron   | ENSG00000229457 | 107254690-107365873 | - | -48817  |
| 2 | 109213890 | 109214158 | 269 | 109214002 | 3.56683  | 2.68164  | 0.30123  | ENSG00000172985:intron   | ENSG00000228551 | 109251421-109251646 | + | -37397  |
| 2 | 109341395 | 109341657 | 263 | 109341520 | 10.65162 | 5.29115  | 5.60305  | ENSG00000172985:intron   | ENSG00000265965 | 109313570-109313625 | - | -27900  |
| 2 | 109429690 | 109430027 | 338 | 109429874 | 5.42487  | 3.87873  | 1.11519  | ENSG00000172985:intron   | ENSG00000265965 | 109313570-109313625 | - | -116233 |
| 2 | 109341395 | 109341657 | 263 | 109341520 | 10.65162 | 5.29115  | 5.60305  | ENSG00000172985:intron   | ENSG00000265965 | 109313570-109313625 | - | -27900  |
| 2 | 109429690 | 109430027 | 338 | 109429874 | 5.42487  | 3.87873  | 1.11519  | ENSG00000172985:intron   | ENSG00000265965 | 109313570-109313625 | - | -116233 |
| 2 | 110139363 | 110139795 | 433 | 110139600 | 3.81246  | 2.91013  | 0.32594  | ENSG00000144061:intron   | ENSG00000144063 | 110083869-110116566 | + | -23012  |
| 2 | 110748406 | 110748678 | 273 | 110748572 | 7.47982  | 4.63532  | 2.78061  | ENSG00000153093:intron   | ENSG00000153093 | 110732572-111118222 | + | 15969   |
| 2 | 111705818 | 111706120 | 303 | 111705996 | 10.64217 | 4.64231  | 5.60051  | ENSG00000153107:intron   | ENSG00000285016 | 111429323-111699033 | - | -6935   |
| 2 | 111847050 | 111847401 | 352 | 111847312 | 3.77589  | 3.20345  | 0.30123  | intergenic               | ENSG00000230958 | 111865797-111866405 | + | -18572  |
| 2 | 116320495 | 116320744 | 250 | 116320685 | 5.24168  | 3.90698  | 1.06394  | intergenic               | ENSG00000271667 | 116687217-116687387 | - | 366768  |
| 2 | 116500003 | 116500294 | 292 | 116500178 | 4.56295  | 3.60388  | 0.59373  | intergenic               | ENSG00000271667 | 116687217-116687387 | - | 187239  |
| 2 | 116689106 | 116689312 | 207 | 116689206 | 4.42776  | 3.51628  | 0.59373  | ENSG00000271667:Promoter | ENSG00000271667 | 116687217-116687387 | - | -1821   |
| 2 | 117032019 | 117032260 | 242 | 117032194 | 5.68188  | 3.88989  | 1.31322  | intergenic               | ENSG00000228898 | 117026536-117027024 | + | 5603    |
| 2 | 121475103 | 121475332 | 230 | 121475325 | 4.1849   | 3.24157  | 0.52478  | ENSG00000074054:intron   | ENSG00000265451 | 121530421-121532705 | + | -55204  |
| 2 | 121532956 | 121533180 | 225 | 121533053 | 5.60156  | 3.98839  | 1.26447  | ENSG00000074054:intron   | ENSG00000264229 | 121530880-121531007 | + | 2187    |
| 2 | 127467398 | 127467601 | 204 | 127467556 | 3.658    | 3.12558  | 0.30123  | ENSG00000231731:Promoter | ENSG00000202429 | 127472233-127472415 | + | -4734   |
| 2 | 127489033 | 127489278 | 246 | 127489133 | 4.29558  | 3.43077  | 0.59373  | :ENSG00000163166:intron  | ENSG00000202429 | 127472233-127472415 | + | 16922   |
| 2 | 130631860 | 130632065 | 206 | 130631984 | 4.56295  | 3.60388  | 0.59373  | ENSG00000231731:intron   | ENSG00000202429 | 127472233-127472415 | + | 16922   |
| 2 | 133344470 | 133344759 | 290 | 133344579 | 3.77589  | 3.20345  | 0.30123  | ENSG00000222038:intron   | ENSG00000251757 | 130622837-130622944 | + | 9125    |
| 2 | 134299140 | 134299376 | 237 | 134299287 | 6.26578  | 4.40475  | 1.75945  | ENSG00000176771:intron   | ENSG00000252688 | 133333828-133333930 | + | 10786   |
| 2 | 134486225 | 134486459 | 235 | 134486257 | 7.77693  | 4.99605  | 3.05159  | ENSG00000152127:intron   | ENSG00000234060 | 134319653-134320078 | - | 20820   |
| 2 | 135400541 | 135400843 | 303 | 135400823 | 4.84324  | 3.65398  | 0.77787  | ENSG00000152128:intron   | ENSG00000234060 | 134319653-134320078 | - | -166263 |
| 2 | 136242629 | 136242937 | 309 | 136242802 | 4.69706  | 3.56173  | 0.69764  | ENSG00000121988:intron   | ENSG00000235651 | 135510545-135511943 | - | 111251  |
| 2 | 138354236 | 138354472 | 237 | 138354341 | 3.34993  | 2.92244  | 0.30123  | intergenic               | ENSG00000235651 | 135510545-135511943 | - | 111251  |
| 2 | 140797784 | 140798040 | 257 | 140797919 | 21.09374 | 9.49794  | 15.42546 | intergenic               | ENSG00000279024 | 136230752-136233245 | + | 12030   |
| 2 | 140941766 | 140942039 | 274 | 140941848 | 3.03786  | 2.80302  | 0.15111  | ENSG00000168702:intron   | ENSG00000237939 | 138307318-138307970 | + | 47035   |
| 2 | 142895744 | 142896078 | 335 | 142895930 | 5.39424  | 4.00432  | 1.09512  | ENSG00000168702:intron   | ENSG00000238065 | 140898422-140899106 | + | -100510 |
| 2 | 142895744 | 142896078 | 335 | 142895930 | 5.39424  | 4.00432  | 1.09512  | ENSG00000115919:intron   | ENSG00000238065 | 140898422-140899106 | + | 43480   |
| 2 | 147298103 | 147298353 | 251 | 147298148 | 4.42776  | 3.51628  | 0.59373  | ENSG00000115919:intron   | ENSG00000115919 | 142877497-143055832 | + | 18413   |
| 2 | 147503680 | 147504139 | 460 | 147503737 | 4.56295  | 3.60388  | 0.59373  | intergenic               | ENSG00000207225 | 147408341-147408448 | + | -110113 |
| 2 | 147561901 | 147562105 | 205 | 147561925 | 3.77589  | 3.20345  | 0.30123  | intergenic               | ENSG00000202074 | 147495437-147495540 | - | -8369   |
| 2 | 150133600 | 150134002 | 403 | 150133851 | 21.43246 | 10.01079 | 15.75174 | intergenic               | ENSG00000202074 | 147495437-147495540 | - | -66462  |
| 2 | 150172684 | 150173081 | 398 | 150173058 | 3.73797  | 3.1784   | 0.30123  | ENSG00000230645:intron   | ENSG00000230645 | 150171422-150301080 | + | -37621  |
| 2 | 150361698 | 150361942 | 245 | 150361790 | 4.21084  | 3.37603  | 0.54478  | intergenic               | ENSG00000230645 | 150171422-150301080 | + | 1460    |
| 2 | 152101537 | 152101783 | 247 | 152101566 | 4.72575  | 3.5798   | 0.71873  | intergenic               | ENSG00000231420 | 150234891-150257007 | - | -104812 |
| 2 | 153168430 | 153168646 | 217 | 153168578 | 4.32442  | 3.44941  | 0.59373  | ENSG00000225214:intron   | ENSG00000182389 | 151832767-152099475 | - | -2184   |
| 2 | 153177858 | 153178065 | 208 | 153178007 | 3.77589  | 3.20345  | 0.30123  | intergenic               | ENSG00000214025 | 153158937-153159683 | + | 9600    |
| 2 | 153621454 | 153621719 | 266 | 153621574 | 5.68188  | 3.88989  | 1.31322  | ENSG00000224612:intron   | ENSG00000214025 | 153158937-153159683 | + | 19024   |
| 2 |           |           |     |           |          |          |          | intergenic               | ENSG00000227400 | 153421615-153593288 | - | -28298  |

|   |           |           |     |           |          |         |          |                                                                                                      |                 |                     |   |         |
|---|-----------|-----------|-----|-----------|----------|---------|----------|------------------------------------------------------------------------------------------------------|-----------------|---------------------|---|---------|
| 2 | 156856803 | 156857069 | 267 | 156856952 | 5.25679  | 3.77493 | 1.07467  | intergenic                                                                                           | ENSG00000238069 | 156777705-156778372 | - | -78563  |
| 2 | 156908911 | 156909114 | 204 | 156908959 | 4.56295  | 3.60388 | 0.59373  | intergenic                                                                                           | ENSG00000238069 | 156777705-156778372 | - | -130640 |
| 2 | 158071882 | 158072206 | 325 | 158072014 | 5.6497   | 4.01836 | 1.29426  | ENSG0000007001:intron                                                                                | ENSG00000231158 | 158065544-158066059 | + | 6499    |
| 2 | 161104259 | 161104516 | 258 | 161104400 | 9.88148  | 5.87674 | 4.90794  | ENSG00000224467:intron                                                                               | ENSG00000136560 | 161136907-161236221 | + | -32520  |
| 2 | 162126536 | 162126749 | 214 | 162126682 | 4.49014  | 3.43176 | 0.59373  | intergenic                                                                                           | ENSG00000115263 | 162142872-162152404 | - | 25762   |
| 2 | 164025542 | 164025799 | 258 | 164025674 | 6.49439  | 4.38367 | 1.95029  | ENSG00000237844:intron                                                                               | ENSG00000226847 | 164213538-164214414 | + | -187868 |
| 2 | 164536414 | 164536688 | 275 | 164536533 | 4.79866  | 3.62581 | 0.77111  | ENSG00000115290:intron                                                                               | ENSG00000277998 | 164573740-164574054 | + | -37189  |
|   |           |           |     |           |          |         |          | ENSG00000169507:three_prime_UTR;ENSG00000169507:exon;ENSG00000223318:Promoter;ENSG00000236283:intron |                 |                     |   |         |
| 2 | 164896706 | 164896997 | 292 | 164896824 | 18.08667 | 8.67376 | 12.52296 |                                                                                                      | ENSG00000223318 | 164895676-164895777 | - | -1074   |
|   |           |           |     |           |          |         |          | ENSG00000169507:intron;ENSG00000236283:intron                                                        |                 |                     |   |         |
| 2 | 164910154 | 164910362 | 209 | 164910212 | 6.38722  | 4.15784 | 1.8702   |                                                                                                      | ENSG00000223318 | 164895676-164895777 | - | -14480  |
| 2 | 165593151 | 165593432 | 282 | 165593330 | 4.94982  | 3.72146 | 0.84841  | ENSG00000178662:intron                                                                               | ENSG00000178662 | 165469646-165689407 | + | 123645  |
| 2 | 165658259 | 165658655 | 397 | 165658619 | 3.49438  | 2.91742 | 0.30123  | ENSG00000178662:intron                                                                               | ENSG00000115339 | 165747590-165794682 | - | 136225  |
| 2 | 165966338 | 165966625 | 288 | 165966523 | 5.39424  | 4.00432 | 1.09512  | intergenic                                                                                           | ENSG00000236107 | 165957398-166301784 | + | 9083    |
| 2 | 168339237 | 168339505 | 269 | 168339419 | 3.2062   | 2.82796 | 0.26185  | intergenic                                                                                           | ENSG00000198648 | 167954019-168248141 | - | -91229  |
| 2 | 168489988 | 168490241 | 254 | 168490138 | 6.26578  | 4.40475 | 1.75945  | ENSG00000172292:intron                                                                               | ENSG00000172292 | 168455861-168775137 | + | 34253   |
| 2 | 168495577 | 168495839 | 263 | 168495678 | 7.114    | 4.7676  | 2.48944  | ENSG00000172292:intron                                                                               | ENSG00000172292 | 168455861-168775137 | + | 39846   |
| 2 | 168489988 | 168490241 | 254 | 168490138 | 6.26578  | 4.40475 | 1.75945  | ENSG00000172292:intron                                                                               | ENSG00000172292 | 168455861-168775137 | + | 34253   |
| 2 | 168495577 | 168495839 | 263 | 168495678 | 7.114    | 4.7676  | 2.48944  | ENSG00000172292:intron                                                                               | ENSG00000172292 | 168455861-168775137 | + | 39846   |
| 2 | 169218352 | 169218708 | 357 | 169218646 | 3.77589  | 3.20345 | 0.30123  | ENSG00000081479:intron                                                                               | ENSG00000235995 | 169115194-169115680 | + | 103335  |
| 2 | 171992055 | 171992288 | 234 | 171992199 | 5.66809  | 4.02982 | 1.31021  | ENSG00000115840:intron                                                                               | ENSG00000172878 | 171999582-172082430 | + | -7411   |
| 2 | 172422651 | 172422867 | 217 | 172422852 | 3.92092  | 3.18945 | 0.4041   | intergenic                                                                                           | ENSG00000278924 | 172423806-172424173 | - | 1414    |
| 2 | 173642651 | 173642890 | 240 | 173642795 | 4.74019  | 3.58891 | 0.73063  | intergenic                                                                                           | ENSG00000237617 | 173705947-173706148 | - | 63378   |
| 2 | 173720714 | 173720938 | 225 | 173720780 | 4.56295  | 3.60388 | 0.59373  | intergenic                                                                                           | ENSG00000237617 | 173705947-173706148 | - | -14677  |
| 2 | 173952447 | 173952740 | 294 | 173952476 | 3.37418  | 2.93841 | 0.30123  | ENSG00000172845:intron                                                                               | ENSG00000172845 | 173906458-173965702 | - | 13109   |
| 2 | 174942105 | 174942431 | 327 | 174942250 | 3.77589  | 3.20345 | 0.30123  | ENSG00000128656:intron                                                                               | ENSG00000128656 | 174799362-175005369 | - | 63101   |
| 2 | 176593864 | 176594144 | 281 | 176594042 | 5.19114  | 3.87478 | 1.02732  | intergenic                                                                                           | ENSG00000283203 | 176600979-176601052 | - | 7048    |
| 2 | 176931874 | 176932078 | 205 | 176931934 | 5.71883  | 4.06146 | 1.34558  | ENSG00000206866:Promoter                                                                             | ENSG00000206866 | 176929984-176930090 | - | -1885   |
| 2 | 176941143 | 176941453 | 311 | 176941290 | 4.458    | 3.53587 | 0.59373  | intergenic                                                                                           | ENSG00000206866 | 176929984-176930090 | - | -11207  |
| 2 | 176986812 | 176987038 | 227 | 176986814 | 3.02441  | 2.62206 | 0.15111  | intergenic                                                                                           | ENSG00000206866 | 176929984-176930090 | - | -56834  |
| 2 | 176988161 | 176988434 | 274 | 176988292 | 5.68188  | 3.88989 | 1.31322  | intergenic                                                                                           | ENSG00000206866 | 176929984-176930090 | - | -58207  |
| 2 | 176931874 | 176932078 | 205 | 176931934 | 5.71883  | 4.06146 | 1.34558  | ENSG00000206866:Promoter                                                                             | ENSG00000206866 | 176929984-176930090 | - | -1885   |
| 2 | 176941143 | 176941453 | 311 | 176941290 | 4.458    | 3.53587 | 0.59373  | intergenic                                                                                           | ENSG00000206866 | 176929984-176930090 | - | -11207  |
| 2 | 176986812 | 176987038 | 227 | 176986814 | 3.02441  | 2.62206 | 0.15111  | intergenic                                                                                           | ENSG00000206866 | 176929984-176930090 | - | -56834  |
| 2 | 176988161 | 176988434 | 274 | 176988292 | 5.68188  | 3.88989 | 1.31322  | intergenic                                                                                           | ENSG00000206866 | 176929984-176930090 | - | -58207  |
| 2 | 176931874 | 176932078 | 205 | 176931934 | 5.71883  | 4.06146 | 1.34558  | ENSG00000206866:Promoter                                                                             | ENSG00000206866 | 176929984-176930090 | - | -1885   |
| 2 | 176941143 | 176941453 | 311 | 176941290 | 4.458    | 3.53587 | 0.59373  | intergenic                                                                                           | ENSG00000206866 | 176929984-176930090 | - | -11207  |
| 2 | 176986812 | 176987038 | 227 | 176986814 | 3.02441  | 2.62206 | 0.15111  | intergenic                                                                                           | ENSG00000206866 | 176929984-176930090 | - | -56834  |
| 2 | 176988161 | 176988434 | 274 | 176988292 | 5.68188  | 3.88989 | 1.31322  | intergenic                                                                                           | ENSG00000206866 | 176929984-176930090 | - | -58207  |
| 2 | 179947139 | 179947424 | 286 | 179947246 | 5.39424  | 4.00432 | 1.09512  | ENSG00000163510:intron                                                                               | ENSG00000280636 | 179934400-179934538 | - | -12743  |
| 2 | 180070291 | 180070594 | 304 | 180070397 | 5.39424  | 4.00432 | 1.09512  | intergenic                                                                                           | ENSG00000163510 | 179944875-180007113 | - | -63329  |
| 2 | 180210887 | 180211119 | 233 | 180211082 | 3.77589  | 3.20345 | 0.30123  | intergenic                                                                                           | ENSG00000163510 | 179944875-180007113 | - | -203889 |
| 2 | 181151450 | 181151690 | 241 | 181151485 | 5.07624  | 3.80169 | 0.93914  | ENSG00000234663:intron                                                                               | ENSG00000238171 | 181076050-181105968 | - | -45601  |
| 2 | 181255795 | 181256013 | 219 | 181255921 | 4.44284  | 3.52605 | 0.59373  | ENSG00000234663:intron                                                                               | ENSG00000266705 | 181305592-181305652 | - | 49748   |
| 2 | 181572181 | 181572420 | 240 | 181572379 | 5.2587   | 3.91783 | 1.07467  | ENSG00000188452:intron                                                                               | ENSG00000188452 | 181536675-181680665 | - | 108365  |
| 2 | 181625652 | 181625869 | 218 | 181625761 | 4.56295  | 3.60388 | 0.59373  | ENSG00000188452:intron                                                                               | ENSG00000188452 | 181536675-181680665 | - | 54905   |
| 2 | 181631510 | 181631724 | 215 | 181631533 | 3.03786  | 2.80302 | 0.15111  | ENSG00000188452:intron                                                                               | ENSG00000188452 | 181536675-181680665 | - | 49048   |
| 2 | 182310779 | 182311006 | 228 | 182310851 | 4.56295  | 3.60388 | 0.59373  | ENSG00000115252:intron                                                                               | ENSG00000242121 | 182314283-182314544 | + | -3391   |

|    |           |           |     |           |          |         |         |                          |                 |                     |   |        |
|----|-----------|-----------|-----|-----------|----------|---------|---------|--------------------------|-----------------|---------------------|---|--------|
| 2  | 183120087 | 183120321 | 235 | 183120143 | 4.22478  | 3.38503 | 0.55558 | ENSG00000163002:intron   | ENSG00000163002 | 183117512-183161680 | + | 2691   |
| 2  | 185962660 | 185962937 | 278 | 185962725 | 6.26578  | 4.40475 | 1.75945 | intergenic               | ENSG00000224019 | 185956586-185957063 | - | -5735  |
| 2  | 185981819 | 185982024 | 206 | 185981854 | 3.77589  | 3.20345 | 0.30123 | intergenic               | ENSG00000224019 | 185956586-185957063 | - | -24858 |
| 2  | 186751840 | 186752067 | 228 | 186751957 | 5.01585  | 3.49609 | 0.89533 | ENSG00000144369:intron   | ENSG00000227227 | 186641338-186695287 | - | -56666 |
| 2  | 189708357 | 189708634 | 278 | 189708387 | 3.77589  | 3.20345 | 0.30123 | ENSG00000151687:intron   | ENSG00000151687 | 189674289-189761193 | + | 34206  |
| 2  | 190902857 | 190903088 | 232 | 190903023 | 4.44284  | 3.52605 | 0.59373 | ENSG00000115419:intron   | ENSG00000235852 | 190880796-190882059 | + | -20913 |
| 2  | 191759117 | 191759361 | 245 | 191759213 | 5.68188  | 3.88989 | 1.31322 | intergenic               | ENSG00000225884 | 191793424-191820250 | + | -34185 |
| 2  | 192891977 | 192892235 | 259 | 192892193 | 4.07388  | 3.28775 | 0.47041 | intergenic               | ENSG00000278406 | 192775942-192776073 | + | 116163 |
| 2  | 193764884 | 193765148 | 265 | 193765069 | 5.39424  | 4.00432 | 1.09512 | intergenic               | ENSG00000224219 | 193730554-193730689 | - | -34326 |
| 2  | 195487051 | 195487328 | 278 | 195487169 | 9.03881  | 5.3697  | 4.15943 | ENSG00000271893:intron   | ENSG00000202206 | 195514035-195514142 | + | -26846 |
| 2  | 196930621 | 196930920 | 300 | 196930822 | 5.60156  | 3.98839 | 1.26447 | intergenic               | ENSG00000197121 | 196833003-196927796 | - | -2974  |
| 2  | 197058426 | 197058667 | 242 | 197058595 | 3.81246  | 2.91013 | 0.32594 | ENSG00000065413:intron   | ENSG00000224442 | 197028710-197030143 | - | -28403 |
| 2  | 197693489 | 197693724 | 236 | 197693535 | 4.31475  | 3.20475 | 0.59373 | ENSG00000222017:intron   | ENSG00000222017 | 197693105-197774823 | + | 501    |
| 2  | 197960699 | 197961185 | 487 | 197960882 | 3.02441  | 2.62206 | 0.15111 | ENSG00000115896:intron   | ENSG00000115896 | 197804701-198572581 | + | 156240 |
| 2  | 197962011 | 197962218 | 208 | 197962081 | 4.56295  | 3.60388 | 0.59373 | ENSG00000115896:intron   | ENSG00000115896 | 197804701-198572581 | + | 157413 |
| 2  | 203579260 | 203579514 | 255 | 203579397 | 7.49188  | 4.02246 | 2.78905 | intergenic               | ENSG00000173166 | 203394344-203535410 | - | -43976 |
| 2  | 203583755 | 203584084 | 330 | 203583965 | 15.24834 | 6.61394 | 9.82777 | intergenic               | ENSG00000173166 | 203394344-203535410 | - | -48509 |
| 2  | 203579260 | 203579514 | 255 | 203579397 | 7.49188  | 4.02246 | 2.78905 | intergenic               | ENSG00000173166 | 203394344-203535410 | - | -43976 |
| 2  | 203583755 | 203584084 | 330 | 203583965 | 15.24834 | 6.61394 | 9.82777 | intergenic               | ENSG00000173166 | 203394344-203535410 | - | -48509 |
| 2  | 203811703 | 203811938 | 236 | 203811810 | 6.4824   | 4.21404 | 1.94623 | intergenic               | ENSG00000206970 | 203782036-203782143 | + | 29784  |
| 2  | 203871513 | 203871947 | 435 | 203871682 | 13.20886 | 5.81482 | 7.94737 | ENSG00000163599:intron   | ENSG00000163599 | 203867770-203873965 | + | 3959   |
| 2  | 204027168 | 204027453 | 286 | 204027312 | 14.89519 | 6.88771 | 9.49496 | intergenic               | ENSG00000235951 | 204065705-204067363 | + | -38395 |
| 2  | 204638121 | 204638350 | 230 | 204638263 | 4.56295  | 3.60388 | 0.59373 | ENSG00000116117:intron   | ENSG00000116117 | 204545792-205620162 | + | 92443  |
| 2  | 205660269 | 205660532 | 264 | 205660356 | 5.0124   | 3.76115 | 0.89533 | intergenic               | ENSG00000118257 | 205681989-205798133 | + | -21589 |
| 2  | 206462862 | 206463106 | 245 | 206463021 | 4.07388  | 3.28775 | 0.47041 | ENSG00000114948:intron   | ENSG00000114948 | 206443538-206621130 | + | 19445  |
| 2  | 211296032 | 211296344 | 313 | 211296250 | 5.39424  | 4.00432 | 1.09512 | intergenic               | ENSG00000231017 | 211298940-211299189 | - | 3001   |
| 2  | 212052599 | 212052842 | 244 | 212052746 | 9.09099  | 5.60604 | 4.18865 | ENSG00000178568:intron   | ENSG00000236007 | 211778272-211779763 | + | 274448 |
| 2  | 215186754 | 215186978 | 225 | 215186875 | 5.6497   | 4.01836 | 1.29426 | intergenic               | ENSG00000144452 | 214931541-215138428 | - | -48437 |
| 2  | 215918128 | 215918360 | 233 | 215918244 | 7.96683  | 4.92425 | 3.22527 | intergenic               | ENSG00000226276 | 215939307-215941719 | - | 23475  |
| 2  | 215940855 | 215941071 | 217 | 215940880 | 4.36824  | 3.47775 | 0.59373 | ENSG00000226276:intron   | ENSG00000226276 | 215939307-215941719 | - | 756    |
| 2  | 215918128 | 215918360 | 233 | 215918244 | 7.96683  | 4.92425 | 3.22527 | intergenic               | ENSG00000226276 | 215939307-215941719 | - | 23475  |
| 2  | 215940855 | 215941071 | 217 | 215940880 | 4.36824  | 3.47775 | 0.59373 | ENSG00000226276:intron   | ENSG00000226276 | 215939307-215941719 | - | 756    |
| 2  | 218124301 | 218124588 | 288 | 218124400 | 4.84324  | 3.65398 | 0.77787 | ENSG00000180871:Promoter | ENSG00000180871 | 218125288-218137253 | + | -844   |
| 2  | 218623018 | 218623233 | 216 | 218623116 | 4.30996  | 3.44006 | 0.59373 | ENSG00000115556:intron   | ENSG00000273466 | 218633255-218634014 | + | 10889  |
| 2  | 219435606 | 219435923 | 318 | 219435636 | 4.93185  | 3.44723 | 0.83372 | ENSG00000072195:intron   | ENSG00000072195 | 219434845-219498287 | + | 919    |
| 2  | 224726139 | 224726546 | 408 | 224726472 | 4.56295  | 3.60388 | 0.59373 | intergenic               | ENSG00000283428 | 224703763-224716365 | - | -9977  |
| 2  | 230134476 | 230134802 | 327 | 230134635 | 7.17425  | 4.80518 | 2.52654 | ENSG00000225963:intron   | ENSG00000283451 | 230138600-230138783 | + | -3961  |
| 2  | 238266415 | 238266662 | 248 | 238266577 | 5.39424  | 4.00432 | 1.09512 | ENSG00000132326:intron   | ENSG00000283635 | 238289126-238300185 | + | -22588 |
| 20 | 1163145   | 1163417   | 273 | 1163235   | 9.85502  | 5.24413 | 4.88402 | ENSG00000125818:intron   | ENSG00000215388 | 1160583-1161697     | + | 2697   |
| 20 | 1652816   | 1653152   | 337 | 1652861   | 4.56295  | 3.60388 | 0.59373 | ENSG00000089012:intron   | ENSG00000089012 | 1629151-1657779     | - | 4795   |
| 20 | 3444820   | 3445106   | 287 | 3444923   | 7.17425  | 4.80518 | 2.52654 | intergenic               | ENSG00000225116 | 3465176-3465444     | - | 20481  |
| 20 | 4748292   | 4748608   | 317 | 4748511   | 4.919    | 3.70193 | 0.82412 | intergenic               | ENSG00000180259 | 4731281-4740668     | - | -7781  |
| 20 | 9122420   | 9122631   | 212 | 9122476   | 3.03786  | 2.80302 | 0.15111 | ENSG00000101333:intron   | ENSG00000101333 | 9068762-9481242     | + | 53763  |
| 20 | 9193443   | 9193663   | 221 | 9193554   | 5.78764  | 4.10443 | 1.39623 | ENSG00000101333:intron   | ENSG00000101333 | 9068762-9481242     | + | 124790 |
| 20 | 11962042  | 11962339  | 298 | 11962275  | 4.84177  | 3.65305 | 0.77787 | intergenic               | ENSG00000236526 | 11909403-11918677   | - | -43513 |
| 20 | 13383095  | 13383310  | 216 | 13383163  | 4.18316  | 3.35817 | 0.52478 | intergenic               | ENSG00000236811 | 13392676-13393674   | + | -9474  |
| 20 | 19090226  | 19090466  | 241 | 19090295  | 5.39424  | 4.00432 | 1.09512 | intergenic               | ENSG00000274863 | 19000708-19056796   | - | -33549 |
| 20 | 19090226  | 19090466  | 241 | 19090295  | 5.39424  | 4.00432 | 1.09512 | intergenic               | ENSG00000274863 | 19000708-19056796   | - | -33549 |
| 20 | 20431115  | 20431323  | 209 | 20431249  | 4.84177  | 3.65305 | 0.77787 | ENSG00000188559:intron   | ENSG00000173404 | 20368120-20370949   | + | 63098  |
| 20 | 20500175  | 20500441  | 267 | 20500247  | 6.66594  | 4.48944 | 2.09177 | ENSG00000188559:intron   | ENSG00000173404 | 20368120-20370949   | + | 132187 |
| 20 | 22533032  | 22533247  | 216 | 22533148  | 4.55072  | 3.59595 | 0.59373 | intergenic               | ENSG00000259974 | 22547670-22578642   | - | 45503  |

|    |          |          |     |          |           |          |           |                                                   |                 |                   |   |         |
|----|----------|----------|-----|----------|-----------|----------|-----------|---------------------------------------------------|-----------------|-------------------|---|---------|
| 20 | 22569858 | 22570182 | 325 | 22570094 | 4. 56295  | 3. 60388 | 0. 59373  | ENSG00000283932:intron;E<br>NSG00000259974:intron | ENSG00000259974 | 22547670-22578642 | - | 8622    |
| 20 | 22605215 | 22605545 | 331 | 22605513 | 3. 61899  | 3. 09983 | 0. 30123  | ENSG00000237396:intron                            | ENSG00000237396 | 22587521-22607517 | - | 2137    |
| 20 | 23132846 | 23133135 | 290 | 23133033 | 6. 26578  | 4. 40475 | 1. 75945  | ENSG00000233746:Promoter                          | ENSG00000233746 | 23125067-23132621 | - | -369    |
| 20 | 23138582 | 23138948 | 367 | 23138617 | 3. 77589  | 3. 20345 | 0. 30123  | intergenic                                        | ENSG00000233746 | 23125067-23132621 | - | -6143   |
| 20 | 23132846 | 23133135 | 290 | 23133033 | 6. 26578  | 4. 40475 | 1. 75945  | ENSG00000233746:Promoter                          | ENSG00000233746 | 23125067-23132621 | - | -369    |
| 20 | 23138582 | 23138948 | 367 | 23138617 | 3. 77589  | 3. 20345 | 0. 30123  | intergenic                                        | ENSG00000233746 | 23125067-23132621 | - | -6143   |
| 20 | 24021733 | 24021949 | 217 | 24021817 | 4. 72575  | 3. 5798  | 0. 71873  | intergenic                                        | ENSG00000167390 | 23989291-23990454 | + | 32549   |
| 20 | 24842903 | 24843319 | 417 | 24843028 | 4. 813    | 3. 37843 | 0. 77787  | intergenic                                        | ENSG00000274173 | 24931839-24932983 | + | -88728  |
| 20 | 25310361 | 25310630 | 270 | 25310473 | 19. 04992 | 8. 08557 | 13. 45281 | ENSG00000100997:intron                            | ENSG00000276952 | 25284914-25285588 | - | -24907  |
| 20 | 28531199 | 28531628 | 430 | 28531237 | 3. 69312  | 2. 14359 | 0. 30123  | intergenic                                        | ENSG00000282826 | 28580708-28602664 | - | 71251   |
| 20 | 28834222 | 28834614 | 393 | 28834444 | 6. 51641  | 4. 07877 | 1. 96373  | intergenic                                        | ENSG00000282826 | 28580708-28602664 | - | -231753 |
| 20 | 28531199 | 28531628 | 430 | 28531237 | 3. 69312  | 2. 14359 | 0. 30123  | intergenic                                        | ENSG00000282826 | 28580708-28602664 | - | 71251   |
| 20 | 28834222 | 28834614 | 393 | 28834444 | 6. 51641  | 4. 07877 | 1. 96373  | intergenic                                        | ENSG00000282826 | 28580708-28602664 | - | -231753 |
| 20 | 28531199 | 28531628 | 430 | 28531237 | 3. 69312  | 2. 14359 | 0. 30123  | intergenic                                        | ENSG00000282826 | 28580708-28602664 | - | 71251   |
| 20 | 28834222 | 28834614 | 393 | 28834444 | 6. 51641  | 4. 07877 | 1. 96373  | intergenic                                        | ENSG00000282826 | 28580708-28602664 | - | -231753 |
| 20 | 28531199 | 28531628 | 430 | 28531237 | 3. 69312  | 2. 14359 | 0. 30123  | intergenic                                        | ENSG00000282826 | 28580708-28602664 | - | 71251   |
| 20 | 28834222 | 28834614 | 393 | 28834444 | 6. 51641  | 4. 07877 | 1. 96373  | intergenic                                        | ENSG00000282826 | 28580708-28602664 | - | -231753 |
| 20 | 31836253 | 31836491 | 239 | 31836407 | 11. 41258 | 5. 13981 | 6. 30043  | intergenic                                        | ENSG00000179772 | 31844300-31845619 | - | 9247    |
| 20 | 33778660 | 33778872 | 213 | 33778751 | 4. 42449  | 3. 05106 | 0. 59373  | ENSG00000131061:intron                            | ENSG00000230837 | 33752166-33752543 | - | -26222  |
| 20 | 33911589 | 33911846 | 258 | 33911672 | 3. 64836  | 3. 01523 | 0. 30123  | intergenic                                        | ENSG00000214200 | 33912322-33913336 | - | 1619    |
| 20 | 37135034 | 37135253 | 220 | 37135055 | 3. 34993  | 2. 92244 | 0. 30123  | ENSG00000101353:intron                            | ENSG00000236159 | 37165773-37166312 | - | 31169   |
| 20 | 38678834 | 38679059 | 226 | 38678980 | 4. 91514  | 3. 56573 | 0. 82412  | intergenic                                        | ENSG00000277965 | 38711820-38712103 | - | 33157   |
| 20 | 38874723 | 38874982 | 260 | 38874956 | 4. 94377  | 3. 58317 | 0. 84363  | ENSG00000101445:intron                            | ENSG00000240474 | 38872769-38873074 | + | 2083    |
| 20 | 39071526 | 39071762 | 237 | 39071552 | 4. 00982  | 3. 24654 | 0. 45978  | intergenic                                        | ENSG00000223864 | 38977710-38978422 | - | -93221  |
| 20 | 39169999 | 39170207 | 209 | 39170038 | 3. 77589  | 3. 20345 | 0. 30123  | intergenic                                        | ENSG00000230324 | 39213776-39224748 | - | 54645   |
| 20 | 39213309 | 39213543 | 235 | 39213514 | 5. 25679  | 3. 77493 | 1. 07467  | intergenic                                        | ENSG00000230324 | 39213776-39224748 | - | 11322   |
| 20 | 43751260 | 43751573 | 314 | 43751433 | 16. 24727 | 7. 1237  | 10. 77556 | intergenic                                        | ENSG00000124196 | 43726163-43726998 | - | -24418  |
| 20 | 44001726 | 44001986 | 261 | 44001880 | 9. 82127  | 4. 56208 | 4. 86215  | ENSG00000124191:intron                            | ENSG00000241229 | 44007247-44007537 | + | -5391   |
| 20 | 44646893 | 44647195 | 303 | 44647018 | 7. 93683  | 4. 3917  | 3. 19908  | ENSG00000196839:intron                            | ENSG00000196839 | 44619521-44652233 | - | 5189    |
| 20 | 44926172 | 44926391 | 220 | 44926309 | 5. 22474  | 3. 89619 | 1. 05478  | ENSG00000101104:intron                            | ENSG00000101104 | 44910061-44959035 | + | 16220   |
| 20 | 47825665 | 47825891 | 227 | 47825804 | 3. 34993  | 2. 92244 | 0. 30123  | intergenic                                        | ENSG00000238950 | 47826968-47827044 | - | 1266    |
| 20 | 47828237 | 47828558 | 322 | 47828391 | 9. 09099  | 5. 60604 | 4. 18865  | ENSG00000238950:Promoter                          | ENSG00000238950 | 47826968-47827044 | - | -1353   |
| 20 | 48562201 | 48562458 | 258 | 48562243 | 4. 41276  | 3. 50657 | 0. 59373  | intergenic                                        | ENSG00000238452 | 48494233-48494309 | - | -68020  |
| 20 | 48982553 | 48982789 | 237 | 48982670 | 6. 24595  | 4. 23134 | 1. 75945  | ENSG00000124198:intron                            | ENSG00000230758 | 49038356-49038602 | - | 55931   |
| 20 | 50338669 | 50339027 | 359 | 50338807 | 4. 72575  | 3. 5798  | 0. 71873  | intergenic                                        | ENSG00000233077 | 50310710-50321342 | - | -17505  |
| 20 | 51400464 | 51400701 | 238 | 51400575 | 7. 40928  | 4. 11883 | 2. 71399  | ENSG00000101096:intron                            | ENSG00000266761 | 51452904-51452977 | - | 52395   |
| 20 | 51585843 | 51586250 | 408 | 51586107 | 3. 77589  | 3. 20345 | 0. 30123  | intergenic                                        | ENSG00000101096 | 51386956-51562831 | - | -23215  |
| 20 | 52172600 | 52172827 | 228 | 52172686 | 4. 69815  | 3. 31233 | 0. 69764  | ENSG0000020256:intron                             | ENSG0000020256  | 52051662-52204308 | - | 31595   |
| 20 | 52434256 | 52434704 | 449 | 52434587 | 5. 39424  | 4. 00432 | 1. 09512  | ENSG00000234948:intron                            | ENSG00000225785 | 52451463-52455619 | - | 21139   |
| 20 | 53259685 | 53259920 | 236 | 53259794 | 4. 31475  | 3. 20475 | 0. 59373  | ENSG00000271774:intron;E<br>NSG00000182463:intron | ENSG00000227705 | 53196228-53208705 | - | -51097  |
| 20 | 54004362 | 54004999 | 638 | 54004568 | 7. 3143   | 4. 5382  | 2. 6406   | ENSG00000064787:intron                            | ENSG00000265595 | 54068407-54068485 | - | 63805   |
| 20 | 54030634 | 54030853 | 220 | 54030704 | 4. 07388  | 3. 28775 | 0. 47041  | ENSG00000064787:intron                            | ENSG00000265595 | 54068407-54068485 | - | 37742   |
| 20 | 54180000 | 54180299 | 300 | 54180161 | 8. 8685   | 5. 46977 | 4. 02102  | intergenic                                        | ENSG00000019186 | 54153448-54173973 | - | -6176   |
| 20 | 58907846 | 58908132 | 287 | 58907974 | 4. 16942  | 3. 34931 | 0. 52478  | ENSG00000087460:intron                            | ENSG00000225806 | 58863527-58888809 | - | -19179  |
| 20 | 59723977 | 59724214 | 238 | 59724151 | 4. 383    | 3. 48731 | 0. 59373  | ENSG00000087495:intron                            | ENSG00000238194 | 59626463-59628289 | - | -95806  |
| 20 | 60403458 | 60403717 | 260 | 60403593 | 7. 3143   | 4. 5382  | 2. 6406   | ENSG00000228340:intron                            | ENSG00000229690 | 60414395-60414872 | - | 11285   |
| 20 | 61045952 | 61046222 | 271 | 61046156 | 5. 56876  | 3. 96799 | 1. 238    | intergenic                                        | ENSG00000229755 | 61077223-61077816 | - | 31729   |
| 20 | 62249734 | 62249963 | 230 | 62249924 | 4. 1849   | 3. 24157 | 0. 52478  | ENSG00000130703:intron                            | ENSG00000130703 | 62231921-62296213 | + | 17927   |
| 20 | 63077516 | 63077827 | 312 | 63077597 | 5. 3628   | 3. 84033 | 1. 09512  | ENSG00000272259:intron                            | ENSG00000274915 | 63102141-63102259 | + | -24470  |

|    |          |          |     |          |          |         |          |                                                     |                 |                   |   |         |
|----|----------|----------|-----|----------|----------|---------|----------|-----------------------------------------------------|-----------------|-------------------|---|---------|
| 21 | 9112234  | 9112474  | 241 | 9112434  | 6.45739  | 2.89139 | 1.93187  | ENSG00000188681:intron                              | ENSG00000188681 | 9068360-9129752   | - | 17398   |
| 21 | 9116665  | 9116879  | 215 | 9116847  | 4.29236  | 2.59088 | 0.59373  | ENSG00000188681:intron                              | ENSG00000188681 | 9068360-9129752   | - | 12980   |
| 21 | 9147849  | 9148063  | 215 | 9147900  | 3.80292  | 2.3931  | 0.32309  | intergenic                                          | ENSG00000188681 | 9068360-9129752   | - | -18203  |
| 21 | 9166340  | 9166556  | 217 | 9166485  | 4.03275  | 2.33536 | 0.47041  | intergenic                                          | ENSG00000188681 | 9068360-9129752   | - | -36695  |
| 21 | 9175332  | 9175581  | 250 | 9175419  | 5.59646  | 3.05845 | 1.26027  | intergenic                                          | ENSG00000188681 | 9068360-9129752   | - | -45704  |
| 21 | 9195556  | 9195848  | 293 | 9195692  | 3.55221  | 2.34329 | 0.30123  | intergenic                                          | ENSG00000188681 | 9068360-9129752   | - | -65949  |
| 21 | 9112234  | 9112474  | 241 | 9112434  | 6.45739  | 2.89139 | 1.93187  | ENSG00000188681:intron                              | ENSG00000188681 | 9068360-9129752   | - | 17398   |
| 21 | 9116665  | 9116879  | 215 | 9116847  | 4.29236  | 2.59088 | 0.59373  | ENSG00000188681:intron                              | ENSG00000188681 | 9068360-9129752   | - | 12980   |
| 21 | 9147849  | 9148063  | 215 | 9147900  | 3.80292  | 2.3931  | 0.32309  | intergenic                                          | ENSG00000188681 | 9068360-9129752   | - | -18203  |
| 21 | 9166340  | 9166556  | 217 | 9166485  | 4.03275  | 2.33536 | 0.47041  | intergenic                                          | ENSG00000188681 | 9068360-9129752   | - | -36695  |
| 21 | 9175332  | 9175581  | 250 | 9175419  | 5.59646  | 3.05845 | 1.26027  | intergenic                                          | ENSG00000188681 | 9068360-9129752   | - | -45704  |
| 21 | 9195556  | 9195848  | 293 | 9195692  | 3.55221  | 2.34329 | 0.30123  | intergenic                                          | ENSG00000188681 | 9068360-9129752   | - | -65949  |
| 21 | 10457837 | 10458134 | 298 | 10457967 | 8.50744  | 3.58385 | 3.68567  | ENSG00000187172:intron                              | ENSG00000273840 | 10482737-10605716 | + | -24752  |
| 21 | 10460439 | 10460661 | 223 | 10460590 | 4.94033  | 2.78888 | 0.8404   | ENSG00000187172:intron                              | ENSG00000273840 | 10482737-10605716 | + | -22187  |
| 21 | 10627502 | 10627731 | 230 | 10627677 | 3.34993  | 2.92244 | 0.30123  | intergenic                                          | ENSG00000276556 | 10640027-10640338 | - | 12722   |
| 21 | 10631677 | 10632058 | 382 | 10631909 | 3.93344  | 3.19748 | 0.41301  | intergenic                                          | ENSG00000276556 | 10640027-10640338 | - | 8471    |
| 21 | 17560866 | 17561141 | 276 | 17561040 | 4.56295  | 3.60388 | 0.59373  | ENSG00000154639:intron                              | ENSG00000199962 | 17576797-17576906 | + | -15794  |
| 21 | 17563539 | 17563889 | 351 | 17563793 | 4.56295  | 3.60388 | 0.59373  | ENSG00000154639:intron                              | ENSG00000199962 | 17576797-17576906 | + | -13083  |
| 21 | 17662964 | 17663280 | 317 | 17663246 | 4.56295  | 3.60388 | 0.59373  | intergenic                                          | ENSG00000226956 | 17659275-17660384 | - | -2737   |
| 21 | 17784719 | 17785045 | 327 | 17784804 | 7.21064  | 4.47768 | 2.55784  | ENSG00000240770:intron                              | ENSG00000240770 | 17763314-17792523 | - | 7641    |
| 21 | 19148779 | 19149022 | 244 | 19148854 | 3.02441  | 2.62206 | 0.15111  | intergenic                                          | ENSG00000229289 | 19130522-19134423 | + | 18378   |
| 21 | 23524238 | 23524567 | 330 | 23524372 | 3.77589  | 3.20345 | 0.30123  | intergenic                                          | ENSG00000227716 | 23477640-23490724 | + | 46762   |
| 21 | 24126747 | 24127024 | 278 | 24126959 | 3.77589  | 3.20345 | 0.30123  | intergenic                                          | ENSG00000224018 | 24155169-24188342 | - | 61457   |
| 21 | 24151478 | 24151741 | 264 | 24151637 | 6.26578  | 4.40475 | 1.75945  | intergenic                                          | ENSG00000224018 | 24155169-24188342 | - | 36733   |
| 21 | 24246291 | 24246542 | 252 | 24246406 | 3.77589  | 3.20345 | 0.30123  | intergenic                                          | ENSG00000224018 | 24155169-24188342 | - | -58074  |
| 21 | 25457504 | 25457760 | 257 | 25457619 | 9.09099  | 5.60604 | 4.18865  | intergenic                                          | ENSG00000185433 | 25385819-25431701 | - | -25930  |
| 21 | 26071969 | 26072300 | 332 | 26072129 | 5.39424  | 4.00432 | 1.09512  | ENSG00000142192:intron                              | ENSG00000224541 | 26158090-26175824 | + | -85956  |
| 21 | 26071969 | 26072300 | 332 | 26072129 | 5.39424  | 4.00432 | 1.09512  | ENSG00000142192:intron                              | ENSG00000224541 | 26158090-26175824 | + | -85956  |
| 21 | 28420292 | 28420543 | 252 | 28420374 | 4.56295  | 3.60388 | 0.59373  | intergenic                                          | ENSG00000226935 | 28539317-28540355 | + | -118900 |
| 21 | 30753100 | 30753365 | 266 | 30753236 | 5.73591  | 4.07212 | 1.35894  | intergenic                                          | ENSG00000187005 | 30754829-30755428 | - | 2196    |
| 21 | 31554503 | 31554743 | 241 | 31554591 | 16.16702 | 6.23562 | 10.6981  | ENSG00000156299:intron                              | ENSG00000237594 | 31559244-31560487 | + | -4621   |
| 21 | 33079056 | 33079398 | 343 | 33079182 | 18.10627 | 6.1624  | 12.54102 | intergenic                                          | ENSG00000227757 | 32913648-33071104 | - | -8122   |
| 21 | 33214297 | 33214647 | 351 | 33214450 | 6.34257  | 3.83987 | 1.8313   | intergenic                                          | ENSG00000159110 | 33229900-33265675 | + | -15428  |
| 21 | 33215658 | 33215876 | 219 | 33215777 | 5.86439  | 3.26245 | 1.4602   | intergenic                                          | ENSG00000159110 | 33229900-33265675 | + | -14133  |
| 21 | 33216086 | 33216327 | 242 | 33216128 | 4.42449  | 3.05106 | 0.59373  | intergenic                                          | ENSG00000159110 | 33229900-33265675 | + | -13694  |
| 21 | 33214297 | 33214647 | 351 | 33214450 | 6.34257  | 3.83987 | 1.8313   | intergenic                                          | ENSG00000159110 | 33229900-33265675 | + | -15428  |
| 21 | 33215658 | 33215876 | 219 | 33215777 | 5.86439  | 3.26245 | 1.4602   | intergenic                                          | ENSG00000159110 | 33229900-33265675 | + | -14133  |
| 21 | 33216086 | 33216327 | 242 | 33216128 | 4.42449  | 3.05106 | 0.59373  | intergenic                                          | ENSG00000159110 | 33229900-33265675 | + | -13694  |
| 21 | 33434788 | 33435029 | 242 | 33434969 | 6.21409  | 3.77143 | 1.75458  | ENSG00000142188:intron;E<br>NSG00000159128:intron   | ENSG00000159128 | 33402895-33479348 | + | 32013   |
| 21 | 34649694 | 34649916 | 223 | 34649749 | 4.69815  | 3.31233 | 0.69764  | intergenic                                          | ENSG00000159212 | 34669388-34718227 | + | -19583  |
| 21 | 34801680 | 34801906 | 227 | 34801691 | 3.02441  | 2.62206 | 0.15111  | intergenic                                          | ENSG00000234380 | 34745756-34784886 | + | 56036   |
| 21 | 34865963 | 34866303 | 341 | 34866093 | 24.00173 | 8.47995 | 18.23352 | intergenic                                          | ENSG00000234380 | 34745756-34784886 | + | 120376  |
| 21 | 34801680 | 34801906 | 227 | 34801691 | 3.02441  | 2.62206 | 0.15111  | intergenic                                          | ENSG00000234380 | 34745756-34784886 | + | 56036   |
| 21 | 34865963 | 34866303 | 341 | 34866093 | 24.00173 | 8.47995 | 18.23352 | intergenic                                          | ENSG00000234380 | 34745756-34784886 | + | 120376  |
| 21 | 35187608 | 35187848 | 241 | 35187796 | 5.05494  | 3.51889 | 0.92723  | ENSG00000159216:intron                              | ENSG00000234703 | 35136637-35139222 | + | 51090   |
| 21 | 35935212 | 35935439 | 228 | 35935385 | 3.9293   | 2.97803 | 0.41132  | ENSG00000159216:intron                              | ENSG00000234008 | 35887194-35887807 | + | 48131   |
| 21 | 36854211 | 36854416 | 206 | 36854331 | 4.27198  | 3.17938 | 0.58762  | ENSG00000159267:intron                              | ENSG00000199806 | 36851910-36852028 | + | 2403    |
| 21 | 36870207 | 36870423 | 217 | 36870362 | 4.00012  | 3.12743 | 0.45978  | ENSG00000159267:intron                              | ENSG00000199806 | 36851910-36852028 | + | 18404   |
| 21 | 36987135 | 36987348 | 214 | 36987327 | 3.99877  | 3.01858 | 0.45978  | ENSG00000207416:Promoter<br>:ENSG00000159267:intron | ENSG00000207416 | 36986738-36986851 | - | -390    |



|    |          |          |     |          |          |         |         |                                                                                                                                                                |                 |                   |   |         |
|----|----------|----------|-----|----------|----------|---------|---------|----------------------------------------------------------------------------------------------------------------------------------------------------------------|-----------------|-------------------|---|---------|
| 21 | 37336404 | 37336622 | 219 | 37336480 | 5.4508   | 3.61666 | 1.13858 | intergenic                                                                                                                                                     | ENSG00000157540 | 37365572-37526358 | + | -29059  |
| 21 | 38111651 | 38111868 | 218 | 38111672 | 5.18253  | 3.59359 | 1.02124 | ENSG00000184029:intron;E<br>NSG00000157542:intron<br>ENSG00000285815:three_prime_UTR;ENSG00000285815:exon;ENSG00000185437:three_prime_UTR;ENSG00000185437:exon | ENSG00000157542 | 37607375-38121345 | - | 9586    |
| 21 | 39515111 | 39515539 | 429 | 39515242 | 5.09049  | 3.41464 | 0.95198 | ENSG00000171587:intron                                                                                                                                         | ENSG00000235012 | 39525582-39529855 | + | -10257  |
| 21 | 40016343 | 40016565 | 223 | 40016477 | 7.72935  | 3.47459 | 3.00722 | ENSG00000171587:intron                                                                                                                                         | ENSG00000183036 | 39867316-39929397 | + | 149137  |
| 21 | 40400404 | 40400636 | 233 | 40400568 | 5.01585  | 3.49609 | 0.89533 | ENSG00000171587:intron                                                                                                                                         | ENSG00000235123 | 40383082-40385358 | + | 17437   |
| 21 | 40434493 | 40435089 | 597 | 40434985 | 4.45315  | 3.28714 | 0.59373 | ENSG00000171587:intron                                                                                                                                         | ENSG00000235123 | 40383082-40385358 | + | 51708   |
| 21 | 40435366 | 40435686 | 321 | 40435649 | 3.73951  | 2.86795 | 0.30123 | ENSG00000171587:intron                                                                                                                                         | ENSG00000235123 | 40383082-40385358 | + | 52443   |
| 21 | 41622862 | 41623127 | 266 | 41622963 | 3.88067  | 2.94972 | 0.37576 | intergenic                                                                                                                                                     | ENSG00000223400 | 41576134-41581319 | - | -41675  |
| 21 | 43307066 | 43307370 | 305 | 43307192 | 23.88818 | 7.54375 | 18.1235 | intergenic                                                                                                                                                     | ENSG00000237864 | 43322416-43332039 | - | 24821   |
| 21 | 44093843 | 44094092 | 250 | 44093861 | 4.3756   | 3.12867 | 0.59373 | ENSG00000160218:intron                                                                                                                                         | ENSG00000241945 | 44107289-44131181 | + | -13322  |
| 21 | 46240859 | 46241240 | 382 | 46241017 | 4.91514  | 3.56573 | 0.82412 | ENSG00000160294:exon;ENSG00000215424:exon                                                                                                                      | ENSG00000228137 | 46246889-46247682 | + | -5840   |
| 21 | 46550570 | 46550795 | 226 | 46550745 | 5.40704  | 3.35205 | 1.10135 | ENSG00000160305:intron                                                                                                                                         | ENSG00000202239 | 46525617-46525722 | + | 25065   |
| 22 | 10715026 | 10715288 | 263 | 10715116 | 6.65428  | 3.74089 | 2.08267 | intergenic                                                                                                                                                     | ENSG00000277248 | 10736170-10736283 | - | 21126   |
| 22 | 11325184 | 11325393 | 210 | 11325248 | 6.06008  | 4.11811 | 1.6243  | intergenic                                                                                                                                                     | ENSG00000276871 | 11249808-11249959 | - | -75329  |
| 22 | 11375875 | 11376184 | 310 | 11376042 | 4.84177  | 3.65305 | 0.77787 | intergenic                                                                                                                                                     | ENSG00000276871 | 11249808-11249959 | - | -126070 |
| 22 | 11453530 | 11453847 | 318 | 11453821 | 4.5011   | 3.09221 | 0.59373 | intergenic                                                                                                                                                     | ENSG00000276871 | 11249808-11249959 | - | -203729 |
| 22 | 11834199 | 11834451 | 253 | 11834336 | 6.51641  | 4.07877 | 1.96373 | intergenic                                                                                                                                                     | ENSG00000276871 | 11249808-11249959 | - | -584365 |
| 22 | 11902167 | 11902378 | 212 | 11902283 | 6.6448   | 3.41016 | 2.07403 | intergenic                                                                                                                                                     | ENSG00000276871 | 11249808-11249959 | - | -652313 |
| 22 | 11325184 | 11325393 | 210 | 11325248 | 6.06008  | 4.11811 | 1.6243  | intergenic                                                                                                                                                     | ENSG00000276871 | 11249808-11249959 | - | -75329  |
| 22 | 11375875 | 11376184 | 310 | 11376042 | 4.84177  | 3.65305 | 0.77787 | intergenic                                                                                                                                                     | ENSG00000276871 | 11249808-11249959 | - | -126070 |
| 22 | 11453530 | 11453847 | 318 | 11453821 | 4.5011   | 3.09221 | 0.59373 | intergenic                                                                                                                                                     | ENSG00000276871 | 11249808-11249959 | - | -203729 |
| 22 | 11834199 | 11834451 | 253 | 11834336 | 6.51641  | 4.07877 | 1.96373 | intergenic                                                                                                                                                     | ENSG00000276871 | 11249808-11249959 | - | -584365 |
| 22 | 11902167 | 11902378 | 212 | 11902283 | 6.6448   | 3.41016 | 2.07403 | intergenic                                                                                                                                                     | ENSG00000276871 | 11249808-11249959 | - | -652313 |
| 22 | 11951307 | 11951557 | 251 | 11951490 | 4.31475  | 3.20475 | 0.59373 | intergenic                                                                                                                                                     | ENSG00000283023 | 12602465-12626642 | + | -651033 |
| 22 | 12075543 | 12075809 | 267 | 12075618 | 4.81478  | 2.9657  | 0.77787 | intergenic                                                                                                                                                     | ENSG00000283023 | 12602465-12626642 | + | -526789 |
| 22 | 12115821 | 12116123 | 303 | 12116028 | 5.93228  | 3.62292 | 1.51685 | intergenic                                                                                                                                                     | ENSG00000283023 | 12602465-12626642 | + | -486493 |
| 22 | 12410354 | 12410561 | 208 | 12410477 | 6.51641  | 4.07877 | 1.96373 | intergenic                                                                                                                                                     | ENSG00000283023 | 12602465-12626642 | + | -192008 |
| 22 | 12589418 | 12589740 | 323 | 12589559 | 8.28323  | 5.11428 | 3.47693 | intergenic                                                                                                                                                     | ENSG00000283023 | 12602465-12626642 | + | -12886  |
| 22 | 12639498 | 12639757 | 260 | 12639568 | 5.75051  | 3.78743 | 1.36222 | intergenic                                                                                                                                                     | ENSG00000283023 | 12602465-12626642 | + | 37162   |
| 22 | 12641096 | 12641341 | 246 | 12641255 | 4.91514  | 3.56573 | 0.82412 | intergenic                                                                                                                                                     | ENSG00000283023 | 12602465-12626642 | + | 38753   |
| 22 | 11951307 | 11951557 | 251 | 11951490 | 4.31475  | 3.20475 | 0.59373 | intergenic                                                                                                                                                     | ENSG00000283023 | 12602465-12626642 | + | -651033 |
| 22 | 12075543 | 12075809 | 267 | 12075618 | 4.81478  | 2.9657  | 0.77787 | intergenic                                                                                                                                                     | ENSG00000283023 | 12602465-12626642 | + | -526789 |
| 22 | 12115821 | 12116123 | 303 | 12116028 | 5.93228  | 3.62292 | 1.51685 | intergenic                                                                                                                                                     | ENSG00000283023 | 12602465-12626642 | + | -486493 |
| 22 | 12410354 | 12410561 | 208 | 12410477 | 6.51641  | 4.07877 | 1.96373 | intergenic                                                                                                                                                     | ENSG00000283023 | 12602465-12626642 | + | -192008 |
| 22 | 12589418 | 12589740 | 323 | 12589559 | 8.28323  | 5.11428 | 3.47693 | intergenic                                                                                                                                                     | ENSG00000283023 | 12602465-12626642 | + | -12886  |
| 22 | 12639498 | 12639757 | 260 | 12639568 | 5.75051  | 3.78743 | 1.36222 | intergenic                                                                                                                                                     | ENSG00000283023 | 12602465-12626642 | + | 37162   |
| 22 | 12641096 | 12641341 | 246 | 12641255 | 4.91514  | 3.56573 | 0.82412 | intergenic                                                                                                                                                     | ENSG00000283023 | 12602465-12626642 | + | 38753   |
| 22 | 11951307 | 11951557 | 251 | 11951490 | 4.31475  | 3.20475 | 0.59373 | intergenic                                                                                                                                                     | ENSG00000283023 | 12602465-12626642 | + | -651033 |
| 22 | 12075543 | 12075809 | 267 | 12075618 | 4.81478  | 2.9657  | 0.77787 | intergenic                                                                                                                                                     | ENSG00000283023 | 12602465-12626642 | + | -526789 |
| 22 | 12115821 | 12116123 | 303 | 12116028 | 5.93228  | 3.62292 | 1.51685 | intergenic                                                                                                                                                     | ENSG00000283023 | 12602465-12626642 | + | -486493 |
| 22 | 12410354 | 12410561 | 208 | 12410477 | 6.51641  | 4.07877 | 1.96373 | intergenic                                                                                                                                                     | ENSG00000283023 | 12602465-12626642 | + | -192008 |
| 22 | 12589418 | 12589740 | 323 | 12589559 | 8.28323  | 5.11428 | 3.47693 | intergenic                                                                                                                                                     | ENSG00000283023 | 12602465-12626642 | + | -12886  |
| 22 | 12639498 | 12639757 | 260 | 12639568 | 5.75051  | 3.78743 | 1.36222 | intergenic                                                                                                                                                     | ENSG00000283023 | 12602465-12626642 | + | 37162   |
| 22 | 12641096 | 12641341 | 246 | 12641255 | 4.91514  | 3.56573 | 0.82412 | intergenic                                                                                                                                                     | ENSG00000283023 | 12602465-12626642 | + | 38753   |
| 22 | 11951307 | 11951557 | 251 | 11951490 | 4.31475  | 3.20475 | 0.59373 | intergenic                                                                                                                                                     | ENSG00000283023 | 12602465-12626642 | + | -651033 |



|    |          |          |     |          |          |          |          |                                                                               |                 |                   |   |         |
|----|----------|----------|-----|----------|----------|----------|----------|-------------------------------------------------------------------------------|-----------------|-------------------|---|---------|
| 22 | 12410354 | 12410561 | 208 | 12410477 | 6.51641  | 4.07877  | 1.96373  | intergenic                                                                    | ENSG00000283023 | 12602465-12626642 | + | -192008 |
| 22 | 12589418 | 12589740 | 323 | 12589559 | 8.28323  | 5.11428  | 3.47693  | intergenic                                                                    | ENSG00000283023 | 12602465-12626642 | + | -12886  |
| 22 | 12639498 | 12639757 | 260 | 12639568 | 5.75051  | 3.78743  | 1.36222  | intergenic                                                                    | ENSG00000283023 | 12602465-12626642 | + | 37162   |
| 22 | 12641096 | 12641341 | 246 | 12641255 | 4.91514  | 3.56573  | 0.82412  | intergenic                                                                    | ENSG00000283023 | 12602465-12626642 | + | 38753   |
| 22 | 11951307 | 11951557 | 251 | 11951490 | 4.31475  | 3.20475  | 0.59373  | intergenic                                                                    | ENSG00000283023 | 12602465-12626642 | + | -651033 |
| 22 | 12075543 | 12075809 | 267 | 12075618 | 4.81478  | 2.9657   | 0.77787  | intergenic                                                                    | ENSG00000283023 | 12602465-12626642 | + | -526789 |
| 22 | 12115821 | 12116123 | 303 | 12116028 | 5.93228  | 3.62292  | 1.51685  | intergenic                                                                    | ENSG00000283023 | 12602465-12626642 | + | -486493 |
| 22 | 12410354 | 12410561 | 208 | 12410477 | 6.51641  | 4.07877  | 1.96373  | intergenic                                                                    | ENSG00000283023 | 12602465-12626642 | + | -192008 |
| 22 | 12589418 | 12589740 | 323 | 12589559 | 8.28323  | 5.11428  | 3.47693  | intergenic                                                                    | ENSG00000283023 | 12602465-12626642 | + | -12886  |
| 22 | 12639498 | 12639757 | 260 | 12639568 | 5.75051  | 3.78743  | 1.36222  | intergenic                                                                    | ENSG00000283023 | 12602465-12626642 | + | 37162   |
| 22 | 12641096 | 12641341 | 246 | 12641255 | 4.91514  | 3.56573  | 0.82412  | intergenic                                                                    | ENSG00000283023 | 12602465-12626642 | + | 38753   |
| 22 | 11951307 | 11951557 | 251 | 11951490 | 4.31475  | 3.20475  | 0.59373  | intergenic                                                                    | ENSG00000283023 | 12602465-12626642 | + | -651033 |
| 22 | 12075543 | 12075809 | 267 | 12075618 | 4.81478  | 2.9657   | 0.77787  | intergenic                                                                    | ENSG00000283023 | 12602465-12626642 | + | -526789 |
| 22 | 12115821 | 12116123 | 303 | 12116028 | 5.93228  | 3.62292  | 1.51685  | intergenic                                                                    | ENSG00000283023 | 12602465-12626642 | + | -486493 |
| 22 | 12410354 | 12410561 | 208 | 12410477 | 6.51641  | 4.07877  | 1.96373  | intergenic                                                                    | ENSG00000283023 | 12602465-12626642 | + | -192008 |
| 22 | 12589418 | 12589740 | 323 | 12589559 | 8.28323  | 5.11428  | 3.47693  | intergenic                                                                    | ENSG00000283023 | 12602465-12626642 | + | -12886  |
| 22 | 12639498 | 12639757 | 260 | 12639568 | 5.75051  | 3.78743  | 1.36222  | intergenic                                                                    | ENSG00000283023 | 12602465-12626642 | + | 37162   |
| 22 | 12641096 | 12641341 | 246 | 12641255 | 4.91514  | 3.56573  | 0.82412  | intergenic                                                                    | ENSG00000283023 | 12602465-12626642 | + | 38753   |
| 22 | 18056895 | 18057254 | 360 | 18057028 | 8.98232  | 4.95279  | 4.10924  | intergenic                                                                    | ENSG00000215193 | 18077919-18131138 | + | -20845  |
| 22 | 19019828 | 19020208 | 381 | 19020161 | 4.56295  | 3.60388  | 0.59373  | ENSG00000270393:Promoter<br>:ENSG00000273032:intron                           | ENSG00000270393 | 19018042-19018916 | - | -1101   |
| 22 | 19606000 | 19606282 | 283 | 19606172 | 4.42421  | 3.39052  | 0.59373  | intergenic                                                                    | ENSG00000230485 | 19630749-19633574 | - | 27433   |
| 22 | 19862351 | 19862630 | 280 | 19862406 | 3.02441  | 2.62206  | 0.15111  | intergenic                                                                    | ENSG00000185838 | 19783223-19854939 | - | -7551   |
| 22 | 22451457 | 22451703 | 247 | 22451642 | 5.39424  | 4.00432  | 1.09512  | intergenic                                                                    | ENSG00000253631 | 22450201-22450652 | + | 1378    |
| 22 | 24352205 | 24352469 | 265 | 24352372 | 4.85824  | 3.66347  | 0.79046  | ENSG00000100014:intron;E<br>NSG00000258555:intron<br>ENSG00000178803:intron;E | ENSG00000128271 | 24417878-24442360 | + | -65541  |
| 22 | 24434170 | 24434431 | 262 | 24434312 | 15.52885 | 6.53715  | 10.089   | NSG00000128271:intron;EN<br>SG00000258555:intron<br>ENSG00000100014:intron;E  | ENSG00000128271 | 24417878-24442360 | + | 16422   |
| 22 | 24352205 | 24352469 | 265 | 24352372 | 4.85824  | 3.66347  | 0.79046  | NSG00000258555:intron<br>ENSG00000178803:intron;E                             | ENSG00000128271 | 24417878-24442360 | + | -65541  |
| 22 | 24434170 | 24434431 | 262 | 24434312 | 15.52885 | 6.53715  | 10.089   | NSG00000128271:intron;EN<br>SG00000258555:intron<br>ENSG00000100028:intron    | ENSG00000128271 | 24417878-24442360 | + | 16422   |
| 22 | 24576949 | 24577496 | 548 | 24577314 | 7.17425  | 4.80518  | 2.52654  | ENSG00000100028:intron                                                        | ENSG00000100031 | 24583749-24629005 | + | -6527   |
| 22 | 25793481 | 25793764 | 284 | 25793622 | 5.39424  | 4.00432  | 1.09512  | ENSG00000133454:intron                                                        | ENSG00000278960 | 25756317-25756669 | - | -36953  |
| 22 | 26081384 | 26081603 | 220 | 26081568 | 3.90845  | 3.18146  | 0.39391  | intergenic                                                                    | ENSG00000232050 | 26006388-26006532 | - | -74961  |
| 22 | 26105588 | 26105820 | 233 | 26105741 | 4.84177  | 3.65305  | 0.77787  | intergenic                                                                    | ENSG00000236464 | 26161833-26164303 | + | -56129  |
| 22 | 26610224 | 26610686 | 463 | 26610453 | 36.74275 | 12.63118 | 30.61533 | ENSG00000100122:intron                                                        | ENSG00000100122 | 26599277-26618088 | + | 7633    |
| 22 | 27738808 | 27739042 | 235 | 27738964 | 4.82831  | 3.64454  | 0.77787  | intergenic                                                                    | ENSG00000226169 | 27716479-27721677 | - | 22445   |
| 22 | 29517862 | 29518093 | 232 | 29517944 | 3.30549  | 2.89321  | 0.30123  | ENSG00000234208:intron;E<br>NSG00000100296:intron                             | ENSG00000234208 | 29513888-29535390 | - | 17413   |
| 22 | 31167812 | 31168262 | 451 | 31168194 | 5.39424  | 4.00432  | 1.09512  | ENSG00000138942:intron                                                        | ENSG00000138942 | 31160182-31207019 | + | 7854    |
| 22 | 31290726 | 31290946 | 221 | 31290851 | 7.69969  | 3.86859  | 2.97966  | ENSG00000228839:Promoter<br>:ENSG00000100100:intron                           | ENSG00000228839 | 31292498-31338021 | + | -1662   |
| 22 | 32812350 | 32812582 | 233 | 32812480 | 6.07692  | 4.28581  | 1.63695  | ENSG00000185666:intron;E<br>NSG00000100234:intron                             | ENSG00000100234 | 32801700-32863043 | + | 10765   |
| 22 | 32838332 | 32838541 | 210 | 32838467 | 3.6499   | 2.91341  | 0.30123  | ENSG00000185666:intron;E<br>NSG00000100234:intron                             | ENSG00000100234 | 32801700-32863043 | + | 36736   |
| 22 | 33835794 | 33836017 | 224 | 33835958 | 3.56795  | 3.06614  | 0.30123  | ENSG00000133424:intron                                                        | ENSG00000273082 | 33922421-33922766 | + | -86516  |
| 22 | 35926225 | 35926502 | 278 | 35926468 | 3.98411  | 3.23002  | 0.45207  | ENSG00000100320:intron                                                        | ENSG00000237406 | 35897269-35898404 | - | -27959  |

|    |          |          |     |          |          |          |          |                                                                          |                 |                   |   |         |
|----|----------|----------|-----|----------|----------|----------|----------|--------------------------------------------------------------------------|-----------------|-------------------|---|---------|
| 22 | 36148604 | 36148873 | 270 | 36148743 | 7.84387  | 5.03722  | 3.11593  | ENSG00000128284:intron                                                   | ENSG00000279805 | 36137429-36139350 | - | -9388   |
| 22 | 36331464 | 36331819 | 356 | 36331640 | 15.66006 | 6.01366  | 10.21136 | ENSG00000100345:intron                                                   | ENSG00000278420 | 36286846-36286907 | - | -44734  |
| 22 | 37838272 | 37838647 | 376 | 37838623 | 3.89605  | 3.1735   | 0.38387  | ENSG00000100124:intron                                                   | ENSG00000284197 | 37844271-37844371 | - | 5912    |
| 22 | 37933837 | 37934060 | 224 | 37934002 | 4.15018  | 2.90511  | 0.51719  | ENSG00000100139:intron                                                   | ENSG00000278948 | 37943049-37944898 | + | -9101   |
| 22 | 38133944 | 38134221 | 278 | 38134142 | 4.74019  | 3.58891  | 0.73063  | ENSG00000184381:intron;ENSG00000279080:exon                              | ENSG00000279080 | 38130215-38150612 | + | 3867    |
| 22 | 38153250 | 38153457 | 208 | 38153321 | 4.53041  | 3.45699  | 0.59373  | ENSG00000184381:intron                                                   | ENSG00000279080 | 38130215-38150612 | + | 23138   |
| 22 | 38481693 | 38481993 | 301 | 38481847 | 3.70522  | 3.05147  | 0.30123  | ENSG00000100196:intron                                                   | ENSG00000100196 | 38468061-38483447 | + | 13781   |
| 22 | 38982198 | 38982482 | 285 | 38982353 | 9.99867  | 5.32258  | 5.01318  | ENSG00000128383:intron;ENSG00000179750:Promoter                          | ENSG00000179750 | 38982346-38992804 | + | -6      |
| 22 | 38985018 | 38985438 | 421 | 38985180 | 33.9636  | 10.66051 | 27.9178  | ENSG00000128383:intron;ENSG00000179750:intron                            | ENSG00000179750 | 38982346-38992804 | + | 2881    |
| 22 | 38982198 | 38982482 | 285 | 38982353 | 9.99867  | 5.32258  | 5.01318  | ENSG00000128383:intron;ENSG00000179750:Promoter                          | ENSG00000179750 | 38982346-38992804 | + | -6      |
| 22 | 38985018 | 38985438 | 421 | 38985180 | 33.9636  | 10.66051 | 27.9178  | ENSG00000128383:intron;ENSG00000179750:intron                            | ENSG00000179750 | 38982346-38992804 | + | 2881    |
| 22 | 40177149 | 40177401 | 253 | 40177297 | 6.4824   | 4.21404  | 1.94623  | ENSG00000100354:intron                                                   | ENSG00000228599 | 40106324-40107066 | - | -70208  |
| 22 | 40224929 | 40225192 | 264 | 40224973 | 3.49438  | 2.91742  | 0.30123  | ENSG00000100354:intron                                                   | ENSG00000228599 | 40106324-40107066 | - | -117994 |
| 22 | 40177149 | 40177401 | 253 | 40177297 | 6.4824   | 4.21404  | 1.94623  | ENSG00000100354:intron                                                   | ENSG00000228599 | 40106324-40107066 | - | -70208  |
| 22 | 40224929 | 40225192 | 264 | 40224973 | 3.49438  | 2.91742  | 0.30123  | ENSG00000100354:intron                                                   | ENSG00000228599 | 40106324-40107066 | - | -117994 |
| 22 | 42193964 | 42194190 | 227 | 42194032 | 4.91514  | 3.56573  | 0.82412  | ENSG00000100354:intron                                                   | ENSG00000226450 | 42149885-42155001 | - | -39075  |
| 22 | 42511729 | 42512033 | 305 | 42512001 | 4.85005  | 3.52617  | 0.78361  | ENSG00000189306:exon;ENSG00000189306:three_prime_UTR;ENSG00000172250:int | ENSG00000189306 | 42509967-42519802 | - | 7921    |
| 22 | 42533376 | 42533625 | 250 | 42533510 | 7.14655  | 3.62494  | 2.51947  | intergenic                                                               | ENSG00000189306 | 42509967-42519802 | - | -13698  |
| 22 | 43103999 | 43104303 | 305 | 43104173 | 8.0161   | 4.5963   | 3.27031  | intergenic                                                               | ENSG00000100290 | 43110747-43129712 | + | -6596   |
| 22 | 43222243 | 43222502 | 260 | 43222312 | 3.3121   | 2.80227  | 0.30123  | ENSG00000159307:intron                                                   | ENSG00000236272 | 43212673-43213661 | + | 9699    |
| 22 | 47387919 | 47388341 | 423 | 47388026 | 3.38496  | 2.66513  | 0.30123  | intergenic                                                               | ENSG00000224715 | 47345568-47373541 | + | 42561   |
| 22 | 47593100 | 47593394 | 295 | 47593200 | 3.54284  | 3.04957  | 0.30123  | intergenic                                                               | ENSG00000205634 | 47621042-47631569 | - | 38322   |
| 22 | 48378814 | 48379036 | 223 | 48378943 | 4.06198  | 3.28009  | 0.47041  | intergenic                                                               | ENSG00000285855 | 48403461-48415571 | + | -24536  |
| 22 | 48832648 | 48832880 | 233 | 48832753 | 8.13775  | 4.49748  | 3.3598   | ENSG00000219438:intron                                                   | ENSG00000205632 | 48866769-48898386 | + | -34005  |
| 22 | 50152529 | 50152774 | 246 | 50152667 | 6.51641  | 4.07877  | 1.96373  | ENSG00000073146:intron                                                   | ENSG00000073150 | 50170730-50180294 | + | -18079  |
| 3  | 9462173  | 9462409  | 237 | 9462245  | 4.1849   | 3.24157  | 0.52478  | ENSG00000168137:intron                                                   | ENSG00000206573 | 9349688-9398579   | - | -63711  |
| 3  | 13332226 | 13332457 | 232 | 13332378 | 5.13473  | 3.43925  | 0.98202  | ENSG00000132182:exon                                                     | ENSG00000144711 | 12897219-13283281 | - | -49060  |
| 3  | 14468563 | 14469024 | 462 | 14468770 | 3.20396  | 2.64557  | 0.26167  | ENSG00000131389:intron                                                   | ENSG00000207163 | 14530981-14531088 | - | 62295   |
| 3  | 15805917 | 15806138 | 222 | 15806022 | 6.06008  | 4.11811  | 1.6243   | ENSG00000206560:intron                                                   | ENSG00000206560 | 15667235-15859771 | - | 53744   |
| 3  | 15919476 | 15919884 | 409 | 15919744 | 4.07388  | 3.28775  | 0.47041  | intergenic                                                               | ENSG00000224728 | 15878046-15879571 | + | 41633   |
| 3  | 16534703 | 16534932 | 230 | 16534722 | 3.60613  | 3.09134  | 0.30123  | ENSG00000233570:Promoter                                                 | ENSG00000233570 | 16536319-16541373 | + | -1502   |
| 3  | 18524923 | 18525183 | 261 | 18525024 | 4.56295  | 3.60388  | 0.59373  | ENSG00000228956:Promoter                                                 | ENSG00000236570 | 18538672-18539899 | + | -13619  |
| 3  | 18572609 | 18572972 | 364 | 18572798 | 3.03786  | 2.80302  | 0.15111  | ENSG00000228956:intron                                                   | ENSG00000236570 | 18538672-18539899 | + | 34118   |
| 3  | 18665200 | 18665434 | 235 | 18665366 | 3.77589  | 3.20345  | 0.30123  | ENSG00000228956:intron                                                   | ENSG00000236570 | 18538672-18539899 | + | 126644  |
| 3  | 18676521 | 18676790 | 270 | 18676616 | 5.39424  | 4.00432  | 1.09512  | ENSG00000228956:intron                                                   | ENSG00000236570 | 18538672-18539899 | + | 137983  |
| 3  | 18524923 | 18525183 | 261 | 18525024 | 4.56295  | 3.60388  | 0.59373  | ENSG00000228956:Promoter                                                 | ENSG00000236570 | 18538672-18539899 | + | -13619  |
| 3  | 18572609 | 18572972 | 364 | 18572798 | 3.03786  | 2.80302  | 0.15111  | ENSG00000228956:intron                                                   | ENSG00000236570 | 18538672-18539899 | + | 34118   |
| 3  | 18665200 | 18665434 | 235 | 18665366 | 3.77589  | 3.20345  | 0.30123  | ENSG00000228956:intron                                                   | ENSG00000236570 | 18538672-18539899 | + | 126644  |
| 3  | 18676521 | 18676790 | 270 | 18676616 | 5.39424  | 4.00432  | 1.09512  | ENSG00000228956:intron                                                   | ENSG00000236570 | 18538672-18539899 | + | 137983  |
| 3  | 20457954 | 20458214 | 261 | 20458045 | 5.07624  | 3.80169  | 0.93914  | ENSG00000231304:intron                                                   | ENSG00000206807 | 20507643-20507756 | - | 49672   |
| 3  | 24548083 | 24548365 | 283 | 24548102 | 4.28127  | 3.42152  | 0.58762  | ENSG00000228791:intron                                                   | ENSG00000233544 | 24555833-24556459 | + | -7609   |
| 3  | 27616125 | 27616417 | 293 | 27616281 | 5.39424  | 4.00432  | 1.09512  | intergenic                                                               | ENSG00000223968 | 27624201-27624456 | - | 8185    |
| 3  | 27616909 | 27617123 | 215 | 27616986 | 5.38044  | 3.99551  | 1.09512  | intergenic                                                               | ENSG00000223968 | 27624201-27624456 | - | 7440    |

|   |           |           |     |           |          |         |          |                                                             |                 |                     |   |         |
|---|-----------|-----------|-----|-----------|----------|---------|----------|-------------------------------------------------------------|-----------------|---------------------|---|---------|
| 3 | 29005250  | 29005482  | 233 | 29005350  | 3.20396  | 2.64557 | 0.26167  | ENSG00000144642:intron;E<br>NSG00000283563:intron           | ENSG00000215004 | 29087395-29088599   | + | -82029  |
| 3 | 29686998  | 29687215  | 218 | 29687164  | 6.89723  | 4.46128 | 2.29209  | ENSG00000144642:intron;E<br>NSG00000283563:intron           | ENSG00000203506 | 29526250-29642809   | - | -44297  |
| 3 | 30353993  | 30354292  | 300 | 30354155  | 3.03786  | 2.80302 | 0.15111  | intergenic                                                  | ENSG00000281710 | 30304320-30304536   | - | -49606  |
| 3 | 30409881  | 30410177  | 297 | 30409954  | 4.56295  | 3.60388 | 0.59373  | intergenic                                                  | ENSG00000281710 | 30304320-30304536   | - | -105492 |
| 3 | 30606263  | 30606761  | 499 | 30606641  | 5.08979  | 3.09487 | 0.95129  | ENSG00000163513:exon;ENS<br>G00000163513:five_prime_<br>UTR | ENSG00000163513 | 30606501-30694142   | + | 10      |
| 3 | 33791906  | 33792125  | 220 | 33792039  | 4.98096  | 3.7412  | 0.87315  | intergenic                                                  | ENSG00000170248 | 33798351-33869707   | + | -6336   |
| 3 | 36444954  | 36445244  | 291 | 36445081  | 7.82144  | 5.02342 | 3.09404  | ENSG00000144681:intron                                      | ENSG00000144681 | 36380343-36548007   | + | 64755   |
| 3 | 42012850  | 42013106  | 257 | 42013015  | 5.53737  | 3.80352 | 1.21582  | ENSG00000182606:Promoter                                    | ENSG00000182606 | 42013801-42225889   | + | -823    |
| 3 | 43499050  | 43499262  | 213 | 43499143  | 4.07388  | 3.28775 | 0.47041  | ENSG00000160746:intron                                      | ENSG00000223916 | 43484971-43485880   | - | -13275  |
| 3 | 43566409  | 43566709  | 301 | 43566531  | 5.39424  | 4.00432 | 1.09512  | ENSG00000160746:intron                                      | ENSG00000223916 | 43484971-43485880   | - | -80678  |
| 3 | 43810874  | 43811295  | 422 | 43811117  | 7.17425  | 4.80518 | 2.52654  | intergenic                                                  | ENSG00000235886 | 43778960-43779982   | - | -31102  |
| 3 | 43814248  | 43814487  | 240 | 43814330  | 3.77589  | 3.20345 | 0.30123  | intergenic                                                  | ENSG00000235886 | 43778960-43779982   | - | -34385  |
| 3 | 44105003  | 44105271  | 269 | 44105078  | 11.66864 | 5.82681 | 6.52722  | intergenic                                                  | ENSG00000207954 | 44114211-44114310   | + | -9074   |
| 3 | 45302896  | 45303165  | 270 | 45303142  | 4.458    | 3.53587 | 0.59373  | intergenic                                                  | ENSG00000202268 | 45255408-45255620   | - | -47410  |
| 3 | 46109354  | 46109601  | 248 | 46109484  | 9.03881  | 5.3697  | 4.15943  | intergenic                                                  | ENSG00000229515 | 46142357-46143677   | - | 34200   |
| 3 | 46386322  | 46386575  | 254 | 46386440  | 5.93037  | 4.03949 | 1.51498  | ENSG00000223552:intron                                      | ENSG00000160791 | 46370853-46376206   | + | 15595   |
| 3 | 46539130  | 46539393  | 264 | 46539223  | 8.134    | 4.66145 | 3.3598   | ENSG00000163827:intron                                      | ENSG00000268324 | 46557397-46559694   | + | -18136  |
| 3 | 51355815  | 51356056  | 242 | 51356011  | 3.77589  | 3.20345 | 0.30123  | ENSG00000088538:intron                                      | ENSG00000145050 | 51385046-51389397   | + | -29111  |
| 3 | 52313801  | 52314051  | 251 | 52313942  | 11.42179 | 5.90287 | 6.30811  | intergenic                                                  | ENSG00000114841 | 52316318-52400491   | + | -2392   |
| 3 | 54700534  | 54700795  | 262 | 54700723  | 4.1849   | 3.24157 | 0.52478  | ENSG00000157445:intron                                      | ENSG00000265992 | 54632121-54639857   | - | -60807  |
| 3 | 56047216  | 56047639  | 424 | 56047408  | 6.26578  | 4.40475 | 1.75945  | ENSG00000187672:intron                                      | ENSG00000200379 | 56072103-56072407   | + | -24676  |
| 3 | 59655385  | 59655596  | 212 | 59655386  | 3.34993  | 2.92244 | 0.30123  | intergenic                                                  | ENSG00000277592 | 59584168-59584445   | + | 71322   |
| 3 | 59772592  | 59772834  | 243 | 59772674  | 3.40931  | 2.96154 | 0.30123  | ENSG00000189283:intron                                      | ENSG00000277592 | 59584168-59584445   | + | 188544  |
| 3 | 59832645  | 59832886  | 242 | 59832724  | 5.39424  | 4.00432 | 1.09512  | ENSG00000189283:intron                                      | ENSG00000277592 | 59584168-59584445   | + | 248597  |
| 3 | 72673119  | 72673323  | 205 | 72673162  | 6.07692  | 4.28581 | 1.63695  | intergenic                                                  | ENSG00000222838 | 72691704-72691811   | - | 18590   |
| 3 | 72731857  | 72732084  | 228 | 72731988  | 5.39424  | 4.00432 | 1.09512  | intergenic                                                  | ENSG00000222838 | 72691704-72691811   | - | -40159  |
| 3 | 74531587  | 74531828  | 242 | 74531741  | 5.01585  | 3.49609 | 0.89533  | intergenic                                                  | ENSG00000113805 | 74262567-74521140   | - | -10567  |
| 3 | 74601743  | 74602083  | 341 | 74601833  | 4.56295  | 3.60388 | 0.59373  | intergenic                                                  | ENSG00000113805 | 74262567-74521140   | - | -80772  |
| 3 | 74647550  | 74647907  | 358 | 74647652  | 4.56295  | 3.60388 | 0.59373  | intergenic                                                  | ENSG00000113805 | 74262567-74521140   | - | -126588 |
| 3 | 74531587  | 74531828  | 242 | 74531741  | 5.01585  | 3.49609 | 0.89533  | intergenic                                                  | ENSG00000113805 | 74262567-74521140   | - | -10567  |
| 3 | 74601743  | 74602083  | 341 | 74601833  | 4.56295  | 3.60388 | 0.59373  | intergenic                                                  | ENSG00000113805 | 74262567-74521140   | - | -80772  |
| 3 | 74647550  | 74647907  | 358 | 74647652  | 4.56295  | 3.60388 | 0.59373  | intergenic                                                  | ENSG00000113805 | 74262567-74521140   | - | -126588 |
| 3 | 74531587  | 74531828  | 242 | 74531741  | 5.01585  | 3.49609 | 0.89533  | intergenic                                                  | ENSG00000113805 | 74262567-74521140   | - | -10567  |
| 3 | 74601743  | 74602083  | 341 | 74601833  | 4.56295  | 3.60388 | 0.59373  | intergenic                                                  | ENSG00000113805 | 74262567-74521140   | - | -80772  |
| 3 | 74647550  | 74647907  | 358 | 74647652  | 4.56295  | 3.60388 | 0.59373  | intergenic                                                  | ENSG00000113805 | 74262567-74521140   | - | -126588 |
| 3 | 75621872  | 75622130  | 259 | 75622024  | 10.24382 | 5.87681 | 5.23377  | ENSG00000172971:intron                                      | ENSG00000172971 | 75619505-75623849   | - | 1848    |
| 3 | 76327947  | 76328289  | 343 | 76328084  | 3.77589  | 3.20345 | 0.30123  | ENSG00000185008:intron                                      | ENSG00000240809 | 76434017-76435428   | + | -105899 |
| 3 | 76393446  | 76393963  | 518 | 76393667  | 3.34993  | 2.92244 | 0.30123  | ENSG00000185008:intron                                      | ENSG00000240809 | 76434017-76435428   | + | -40313  |
| 3 | 89553499  | 89553759  | 261 | 89553503  | 3.77589  | 3.20345 | 0.30123  | intergenic                                                  | ENSG00000240951 | 89587885-89588570   | - | 34941   |
| 3 | 89555508  | 89555803  | 296 | 89555667  | 6.4824   | 4.21404 | 1.94623  | intergenic                                                  | ENSG00000240951 | 89587885-89588570   | - | 32915   |
| 3 | 93470524  | 93470773  | 250 | 93470655  | 56.22915 | 3.80316 | 49.67563 | intergenic                                                  | ENSG00000251727 | 93843763-93843862   | + | -373115 |
| 3 | 93732500  | 93732705  | 206 | 93732643  | 5.39424  | 4.00432 | 1.09512  | intergenic                                                  | ENSG00000251727 | 93843763-93843862   | + | -111161 |
| 3 | 97490717  | 97491007  | 291 | 97490958  | 4.56295  | 3.60388 | 0.59373  | ENSG00000080224:intron                                      | ENSG00000251172 | 97481176-97481506   | - | -9355   |
| 3 | 97578942  | 97579225  | 284 | 97579173  | 3.77589  | 3.20345 | 0.30123  | ENSG00000080224:intron                                      | ENSG00000251172 | 97481176-97481506   | - | -97577  |
| 3 | 97490717  | 97491007  | 291 | 97490958  | 4.56295  | 3.60388 | 0.59373  | ENSG00000080224:intron                                      | ENSG00000251172 | 97481176-97481506   | - | -9355   |
| 3 | 97578942  | 97579225  | 284 | 97579173  | 3.77589  | 3.20345 | 0.30123  | ENSG00000080224:intron                                      | ENSG00000251172 | 97481176-97481506   | - | -97577  |
| 3 | 101134908 | 101135161 | 254 | 101134947 | 3.38583  | 2.94608 | 0.30123  | intergenic                                                  | ENSG00000242573 | 101163093-101163986 | + | -28059  |

|   |           |           |     |           |          |          |          |                                                |                  |                     |   |         |
|---|-----------|-----------|-----|-----------|----------|----------|----------|------------------------------------------------|------------------|---------------------|---|---------|
| 3 | 101518527 | 101518749 | 223 | 101518704 | 4.93185  | 3.44723  | 0.83372  | intergenic                                     | ENSG00000175841  | 101521890-101522979 | + | -3252   |
| 3 | 101568390 | 101568652 | 263 | 101568479 | 6.02088  | 4.25059  | 1.59152  | intergenic                                     | ENSG000000081154 | 101574094-101594437 | + | -5573   |
| 3 | 101936606 | 101936917 | 312 | 101936744 | 12.25472 | 5.36328  | 7.06105  | intergenic                                     | ENSG000000214407 | 101940858-101997926 | + | -4097   |
| 3 | 101942519 | 101942731 | 213 | 101942622 | 7.38831  | 4.58155  | 2.69775  | ENSG000000214407:intron                        | ENSG000000214407 | 101940858-101997926 | + | 1766    |
| 3 | 102125345 | 102125659 | 315 | 102125655 | 3.34993  | 2.92244  | 0.30123  | ENSG00000170044:intron                         | ENSG00000170044  | 102099243-102479841 | + | 26258   |
| 3 | 102183963 | 102184333 | 371 | 102184193 | 4.94982  | 3.72146  | 0.84841  | ENSG00000170044:intron                         | ENSG00000170044  | 102099243-102479841 | + | 84904   |
| 3 | 104519167 | 104519403 | 237 | 104519310 | 6.25041  | 4.39506  | 1.75945  | intergenic                                     | ENSG000000243635 | 104502699-104503266 | + | 16585   |
| 3 | 106819745 | 106820078 | 334 | 106819876 | 4.56295  | 3.60388  | 0.59373  | intergenic                                     | ENSG000000239997 | 106848670-106849260 | + | -28759  |
| 3 | 108100987 | 108101515 | 529 | 108101151 | 15.93958 | 7.45562  | 10.47535 | intergenic                                     | ENSG00000196776  | 108043093-108091862 | - | -9388   |
| 3 | 111543726 | 111544010 | 285 | 111543875 | 4.56295  | 3.60388  | 0.59373  | intergenic                                     | ENSG000000240787 | 111570637-111571054 | - | 27186   |
| 3 | 112676874 | 112677128 | 255 | 112677001 | 11.85996 | 5.53143  | 6.70891  | intergenic                                     | ENSG000000242308 | 112696907-112697706 | - | 20705   |
| 3 | 119700593 | 119700918 | 326 | 119700768 | 8.17554  | 4.86236  | 3.38452  | intergenic                                     | ENSG00000183833  | 119703021-119767102 | + | -2266   |
| 3 | 120282352 | 120282604 | 253 | 120282527 | 6.49439  | 4.38367  | 1.95029  | ENSG00000175697:intron                         | ENSG00000175697  | 120164644-120285094 | - | 2616    |
| 3 | 121699939 | 121700161 | 223 | 121699969 | 5.94748  | 4.20452  | 1.52959  | ENSG00000173230:intron                         | ENSG00000180353  | 121631398-121660927 | - | -39122  |
| 3 | 121699939 | 121700161 | 223 | 121699969 | 5.94748  | 4.20452  | 1.52959  | ENSG00000173230:intron                         | ENSG00000180353  | 121631398-121660927 | - | -39122  |
| 3 | 122573339 | 122573553 | 215 | 122573494 | 5.31697  | 3.81203  | 1.09512  | ime_UTR;ENSG00000163840:exon                   | ENSG00000173200  | 122577601-122639047 | + | -4155   |
| 3 | 122610067 | 122610367 | 301 | 122610198 | 9.99238  | 5.72768  | 5.00703  | ENSG00000173200:intron                         | ENSG00000173200  | 122577601-122639047 | + | 32615   |
| 3 | 123371458 | 123371685 | 228 | 123371603 | 4.62651  | 3.51732  | 0.63659  | ENSG00000173175:intron                         | ENSG00000173175  | 123282295-123449758 | - | 78187   |
| 3 | 125053484 | 125053808 | 325 | 125053532 | 4.31475  | 3.20475  | 0.59373  | ENSG00000173706:intron                         | ENSG00000173706  | 124965709-125055958 | - | 2312    |
| 3 | 126252736 | 126252986 | 251 | 126252969 | 3.29424  | 2.88581  | 0.30123  | intergenic                                     | ENSG000000250934 | 126266795-126291279 | + | -13934  |
| 3 | 126911292 | 126911769 | 478 | 126911623 | 32.49686 | 10.84686 | 26.49206 | ENSG00000159685:intron                         | ENSG000000280053 | 126973064-126976426 | + | -61534  |
| 3 | 130329116 | 130329378 | 263 | 130329298 | 6.5896   | 4.44231  | 2.02209  | intergenic                                     | ENSG00000172752  | 130345515-130484844 | + | -16268  |
| 3 | 130388847 | 130389180 | 334 | 130389058 | 3.77589  | 3.20345  | 0.30123  | ENSG00000172752:exon                           | ENSG00000172752  | 130345515-130484844 | + | 43498   |
| 3 | 130504740 | 130505039 | 300 | 130504802 | 4.98096  | 3.7412   | 0.87315  | intergenic                                     | ENSG000000206384 | 130560333-130678155 | + | -55444  |
| 3 | 130603015 | 130603271 | 257 | 130603171 | 3.77589  | 3.20345  | 0.30123  | ENSG000000206384:intron                        | ENSG000000206384 | 130560333-130678155 | + | 42809   |
| 3 | 130835573 | 130835834 | 262 | 130835728 | 4.47325  | 3.54574  | 0.59373  | intergenic                                     | ENSG000000232829 | 130827658-130828376 | + | 8045    |
| 3 | 130850150 | 130850394 | 245 | 130850282 | 9.78373  | 4.69287  | 4.83465  | ENSG00000017260:Promoter                       | ENSG00000017260  | 130850594-131016712 | + | -322    |
| 3 | 132283471 | 132283698 | 228 | 132283575 | 4.64049  | 3.52611  | 0.64891  | ENSG000000196353:intron                        | ENSG000000196353 | 131533554-132285410 | - | 1826    |
| 3 | 133475598 | 133475905 | 308 | 133475799 | 10.69825 | 4.53118  | 5.64748  | intergenic                                     | ENSG000000214301 | 133490823-133491505 | + | -15072  |
| 3 | 134620714 | 134620996 | 283 | 134620911 | 4.64049  | 3.52611  | 0.64891  | ENSG00000174611:intron                         | ENSG00000154928  | 134597800-135260467 | + | 23054   |
| 3 | 135175157 | 135175362 | 206 | 135175324 | 4.51948  | 3.5757   | 0.59373  | ENSG00000154928:intron;ENSG000000240086:intron | ENSG000000240086 | 135138468-135439888 | - | 264629  |
| 3 | 135185209 | 135185479 | 271 | 135185287 | 3.34993  | 2.92244  | 0.30123  | ENSG00000154928:intron;ENSG000000240086:intron | ENSG000000240086 | 135138468-135439888 | - | 254544  |
| 3 | 135233078 | 135233347 | 270 | 135233284 | 4.36824  | 3.47775  | 0.59373  | ENSG00000154928:intron;ENSG000000240086:intron | ENSG000000240086 | 135138468-135439888 | - | 206676  |
| 3 | 135513999 | 135514224 | 226 | 135514031 | 4.07388  | 3.28775  | 0.47041  | intergenic                                     | ENSG000000240086 | 135138468-135439888 | - | -74223  |
| 3 | 135175157 | 135175362 | 206 | 135175324 | 4.51948  | 3.5757   | 0.59373  | ENSG00000154928:intron;ENSG000000240086:intron | ENSG000000240086 | 135138468-135439888 | - | 264629  |
| 3 | 135185209 | 135185479 | 271 | 135185287 | 3.34993  | 2.92244  | 0.30123  | ENSG00000154928:intron;ENSG000000240086:intron | ENSG000000240086 | 135138468-135439888 | - | 254544  |
| 3 | 135233078 | 135233347 | 270 | 135233284 | 4.36824  | 3.47775  | 0.59373  | ENSG00000154928:intron;ENSG000000240086:intron | ENSG000000240086 | 135138468-135439888 | - | 206676  |
| 3 | 135513999 | 135514224 | 226 | 135514031 | 4.07388  | 3.28775  | 0.47041  | intergenic                                     | ENSG000000240086 | 135138468-135439888 | - | -74223  |
| 3 | 137194779 | 137195066 | 288 | 137194814 | 3.34993  | 2.92244  | 0.30123  | intergenic                                     | ENSG000000249407 | 136959124-136982196 | - | -212726 |
| 3 | 137236420 | 137236636 | 217 | 137236580 | 4.14216  | 3.33173  | 0.51073  | intergenic                                     | ENSG000000249407 | 136959124-136982196 | - | -254331 |
| 3 | 138196194 | 138196488 | 295 | 138196426 | 4.14216  | 3.33173  | 0.51073  | ENSG00000114098:intron                         | ENSG00000114098  | 138187247-138298389 | + | 9093    |
| 3 | 138406258 | 138406517 | 260 | 138406508 | 4.84177  | 3.65305  | 0.77787  | intergenic                                     | ENSG000000158220 | 138434585-138481686 | + | -28198  |
| 3 | 140777228 | 140777454 | 227 | 140777357 | 5.17447  | 3.86417  | 1.0143   | intergenic                                     | ENSG000000261826 | 140865074-140867783 | - | 90442   |

|   |           |           |     |           |          |         |         |                                                                                |                 |                     |   |         |
|---|-----------|-----------|-----|-----------|----------|---------|---------|--------------------------------------------------------------------------------|-----------------|---------------------|---|---------|
| 3 | 141634872 | 141635123 | 252 | 141634978 | 6.14345  | 4.16882 | 1.69288 | intergenic                                                                     | ENSG00000242104 | 141660535-141729405 | + | -25538  |
| 3 | 141659435 | 141659695 | 261 | 141659470 | 3.49438  | 2.91742 | 0.30123 | ENSG00000242104:Promoter                                                       | ENSG00000242104 | 141660535-141729405 | + | -970    |
| 3 | 141724517 | 141724749 | 233 | 141724549 | 6.26578  | 4.40475 | 1.75945 | ENSG00000242104:intron                                                         | ENSG00000241526 | 141724424-141724526 | + | 208     |
| 3 | 143612456 | 143612829 | 374 | 143612479 | 4.07388  | 3.28775 | 0.47041 | ENSG00000181804:intron                                                         | ENSG00000248374 | 143620527-143627690 | + | -7885   |
| 3 | 143627320 | 143627734 | 415 | 143627562 | 3.49438  | 2.91742 | 0.30123 | ENSG00000181804:intron;E<br>NSG00000248374:exon                                | ENSG00000248374 | 143620527-143627690 | + | 6999    |
| 3 | 143689472 | 143689831 | 360 | 143689504 | 3.77589  | 3.20345 | 0.30123 | ENSG00000181804:intron                                                         | ENSG00000248374 | 143620527-143627690 | + | 69124   |
| 3 | 143612456 | 143612829 | 374 | 143612479 | 4.07388  | 3.28775 | 0.47041 | ENSG00000181804:intron                                                         | ENSG00000248374 | 143620527-143627690 | + | -7885   |
| 3 | 143627320 | 143627734 | 415 | 143627562 | 3.49438  | 2.91742 | 0.30123 | ENSG00000181804:intron;E<br>NSG00000248374:exon                                | ENSG00000248374 | 143620527-143627690 | + | 6999    |
| 3 | 143689472 | 143689831 | 360 | 143689504 | 3.77589  | 3.20345 | 0.30123 | ENSG00000181804:intron                                                         | ENSG00000248374 | 143620527-143627690 | + | 69124   |
| 3 | 143831360 | 143831596 | 237 | 143831498 | 11.02474 | 6.11671 | 5.94462 | ENSG00000181804:intron                                                         | ENSG00000181804 | 143265221-143848531 | - | 17053   |
| 3 | 144808236 | 144808443 | 208 | 144808374 | 4.56295  | 3.60388 | 0.59373 | intergenic                                                                     | ENSG00000280397 | 144442210-144445844 | - | -362495 |
| 3 | 146776948 | 146777275 | 328 | 146777112 | 5.39424  | 4.00432 | 1.09512 | intergenic                                                                     | ENSG00000242671 | 146921922-146925218 | + | -144811 |
| 3 | 148298661 | 148299027 | 367 | 148298950 | 4.84177  | 3.65305 | 0.77787 | intergenic                                                                     | ENSG00000242440 | 148280890-148399956 | + | 17953   |
| 3 | 150050361 | 150050596 | 236 | 150050532 | 3.76522  | 3.1964  | 0.30123 | ENSG00000240477:Promoter<br>;ENSG00000070087:intron;<br>FNSG00000243944:intron | ENSG00000240477 | 150050728-150051456 | + | -250    |
| 3 | 152046263 | 152046517 | 255 | 152046425 | 3.03786  | 2.80302 | 0.15111 | intergenic                                                                     | ENSG00000239941 | 152118172-152151724 | - | 105334  |
| 3 | 152135098 | 152135445 | 348 | 152135162 | 4.56295  | 3.60388 | 0.59373 | ENSG00000239941:intron                                                         | ENSG00000239941 | 152118172-152151724 | - | 16453   |
| 3 | 152171169 | 152171384 | 216 | 152171282 | 3.77589  | 3.20345 | 0.30123 | intergenic                                                                     | ENSG00000239941 | 152118172-152151724 | - | -19552  |
| 3 | 152537745 | 152537980 | 236 | 152537928 | 4.76929  | 3.60726 | 0.74587 | intergenic                                                                     | ENSG00000243305 | 152457758-152496813 | - | -41049  |
| 3 | 153399580 | 153399923 | 344 | 153399797 | 6.78327  | 4.56203 | 2.19117 | ENSG00000238755:intron                                                         | ENSG00000241912 | 153376830-153377562 | + | 22921   |
| 3 | 153513290 | 153513509 | 220 | 153513487 | 4.56295  | 3.60388 | 0.59373 | ENSG00000238755:intron                                                         | ENSG00000207323 | 153471465-153471571 | + | -41828  |
| 3 | 153672190 | 153672395 | 206 | 153672343 | 3.78699  | 3.10368 | 0.30881 | ENSG00000238755:intron                                                         | ENSG00000200162 | 153607376-153607479 | - | 64916   |
| 3 | 153735401 | 153735743 | 343 | 153735424 | 3.93333  | 3.08638 | 0.41301 | ENSG00000238755:intron                                                         | ENSG00000200162 | 153607376-153607479 | + | 128195  |
| 3 | 156368273 | 156368527 | 255 | 156368384 | 8.17399  | 4.36112 | 3.38452 | ENSG00000169282:intron                                                         | ENSG00000242370 | 156441156-156446905 | - | 78505   |
| 3 | 157065268 | 157065754 | 487 | 157065465 | 4.45692  | 3.17469 | 0.59373 | intergenic                                                                     | ENSG00000241544 | 157081840-157088547 | + | -16329  |
| 3 | 157365070 | 157365320 | 251 | 157365169 | 5.13473  | 3.43925 | 0.98202 | ENSG00000243176:intron;E<br>NSG00000197415:intron                              | ENSG00000163661 | 157436788-157443628 | + | -71593  |
| 3 | 157462989 | 157463228 | 240 | 157462996 | 3.20396  | 2.64557 | 0.26167 | ENSG00000197415:intron                                                         | ENSG00000163661 | 157436788-157443628 | + | 26320   |
| 3 | 158286899 | 158287141 | 243 | 158287056 | 3.02441  | 2.62206 | 0.15111 | ENSG00000174891:intron                                                         | ENSG00000241723 | 158275808-158276421 | - | -10598  |
| 3 | 159418823 | 159419155 | 333 | 159418882 | 3.40215  | 2.85906 | 0.30123 | ENSG00000283154:intron                                                         | ENSG00000244249 | 159386755-159387440 | - | -31548  |
| 3 | 159455833 | 159456057 | 225 | 159455962 | 4.46483  | 3.29412 | 0.59373 | ENSG00000283154:intron                                                         | ENSG00000244249 | 159386755-159387440 | - | -68504  |
| 3 | 159974939 | 159975320 | 382 | 159974989 | 5.24809  | 3.63214 | 1.06984 | ENSG00000244040:intron                                                         | ENSG00000168811 | 159988749-159996019 | + | -13620  |
| 3 | 160207325 | 160207551 | 227 | 160207352 | 3.81246  | 2.91013 | 0.32594 | ENSG00000244040:Promoter                                                       | ENSG00000244040 | 159909381-160225299 | - | 17861   |
| 3 | 161163306 | 161163652 | 347 | 161163522 | 9.91525  | 5.47441 | 4.94    | ENSG00000169251:intron                                                         | ENSG00000169255 | 161083882-161105384 | - | -58094  |
| 3 | 161474374 | 161474693 | 320 | 161474541 | 3.01636  | 2.45817 | 0.15111 | intergenic                                                                     | ENSG00000182447 | 161496807-161503942 | + | -22274  |
| 3 | 161503295 | 161503558 | 264 | 161503407 | 3.6499   | 2.91341 | 0.30123 | ENSG00000182447:exon                                                           | ENSG00000182447 | 161496807-161503942 | + | 6619    |
| 3 | 161511106 | 161511347 | 242 | 161511201 | 3.6499   | 2.91341 | 0.30123 | intergenic                                                                     | ENSG00000182447 | 161496807-161503942 | + | 14419   |
| 3 | 161536991 | 161537224 | 234 | 161537128 | 4.97105  | 3.59979 | 0.86452 | intergenic                                                                     | ENSG00000182447 | 161496807-161503942 | + | 40300   |
| 3 | 161474374 | 161474693 | 320 | 161474541 | 3.01636  | 2.45817 | 0.15111 | intergenic                                                                     | ENSG00000182447 | 161496807-161503942 | + | -22274  |
| 3 | 161503295 | 161503558 | 264 | 161503407 | 3.6499   | 2.91341 | 0.30123 | ENSG00000182447:exon                                                           | ENSG00000182447 | 161496807-161503942 | + | 6619    |
| 3 | 161511106 | 161511347 | 242 | 161511201 | 3.6499   | 2.91341 | 0.30123 | intergenic                                                                     | ENSG00000182447 | 161496807-161503942 | + | 14419   |
| 3 | 161536991 | 161537224 | 234 | 161537128 | 4.97105  | 3.59979 | 0.86452 | intergenic                                                                     | ENSG00000182447 | 161496807-161503942 | + | 40300   |
| 3 | 161474374 | 161474693 | 320 | 161474541 | 3.01636  | 2.45817 | 0.15111 | intergenic                                                                     | ENSG00000182447 | 161496807-161503942 | + | -22274  |
| 3 | 161503295 | 161503558 | 264 | 161503407 | 3.6499   | 2.91341 | 0.30123 | ENSG00000182447:exon                                                           | ENSG00000182447 | 161496807-161503942 | + | 6619    |
| 3 | 161511106 | 161511347 | 242 | 161511201 | 3.6499   | 2.91341 | 0.30123 | intergenic                                                                     | ENSG00000182447 | 161496807-161503942 | + | 14419   |
| 3 | 161536991 | 161537224 | 234 | 161537128 | 4.97105  | 3.59979 | 0.86452 | intergenic                                                                     | ENSG00000182447 | 161496807-161503942 | + | 40300   |
| 3 | 161866700 | 161866906 | 207 | 161866752 | 3.38496  | 2.66513 | 0.30123 | intergenic                                                                     | ENSG00000240354 | 161816908-161821908 | - | -44894  |
| 3 | 162030162 | 162030400 | 239 | 162030344 | 3.81246  | 2.91013 | 0.32594 | intergenic                                                                     | ENSG00000240354 | 161816908-161821908 | - | -208372 |

|   |           |           |     |           |          |         |         |                          |                 |                     |   |        |
|---|-----------|-----------|-----|-----------|----------|---------|---------|--------------------------|-----------------|---------------------|---|--------|
| 3 | 162404392 | 162404856 | 465 | 162404647 | 4.56295  | 3.60388 | 0.59373 | intergenic               | ENSG00000241874 | 162486540-162486949 | - | 82325  |
| 3 | 165538825 | 165539034 | 210 | 165538970 | 3.89605  | 3.1735  | 0.38387 | ENSG00000244128:intron   | ENSG00000114200 | 165772903-165837472 | - | 298543 |
| 3 | 165778435 | 165778667 | 233 | 165778511 | 6.70467  | 4.51337 | 2.12517 | ENSG00000114200:intron   | ENSG00000114200 | 165772903-165837472 | - | 58921  |
| 3 | 165856067 | 165856389 | 323 | 165856176 | 3.49438  | 2.91742 | 0.30123 | intergenic               | ENSG00000114200 | 165772903-165837472 | - | -18755 |
| 3 | 165538825 | 165539034 | 210 | 165538970 | 3.89605  | 3.1735  | 0.38387 | ENSG00000244128:intron   | ENSG00000114200 | 165772903-165837472 | - | 298543 |
| 3 | 165778435 | 165778667 | 233 | 165778511 | 6.70467  | 4.51337 | 2.12517 | ENSG00000114200:intron   | ENSG00000114200 | 165772903-165837472 | - | 58921  |
| 3 | 165856067 | 165856389 | 323 | 165856176 | 3.49438  | 2.91742 | 0.30123 | intergenic               | ENSG00000114200 | 165772903-165837472 | - | -18755 |
| 3 | 166478479 | 166478701 | 223 | 166478594 | 6.55036  | 4.2543  | 1.99411 | intergenic               | ENSG00000244321 | 166569692-166570763 | - | 92173  |
| 3 | 168085568 | 168085883 | 316 | 168085646 | 8.98232  | 4.95279 | 4.10924 | ENSG00000173905:intron   | ENSG00000173905 | 168008676-168095975 | - | 10250  |
| 3 | 168101350 | 168101640 | 291 | 168101432 | 3.13241  | 2.68948 | 0.2189  | intergenic               | ENSG00000173905 | 168008676-168095975 | - | -5519  |
| 3 | 168415672 | 168415881 | 210 | 168415703 | 3.88967  | 3.0596  | 0.37913 | ENSG00000206120:intron   | ENSG00000222357 | 168475197-168475388 | + | -59421 |
| 3 | 168431408 | 168431624 | 217 | 168431421 | 4.0114   | 3.13438 | 0.46103 | ENSG00000206120:intron   | ENSG00000222357 | 168475197-168475388 | + | -43681 |
| 3 | 169905768 | 169905988 | 221 | 169905923 | 3.30754  | 2.7073  | 0.30123 | ENSG00000240128:Promoter | ENSG00000240128 | 169902979-169904260 | - | -1617  |
| 3 | 170133161 | 170133674 | 514 | 170133377 | 3.9797   | 2.90741 | 0.44999 | ENSG00000173889:intron   | ENSG00000199536 | 170149844-170149951 | + | -16427 |
|   |           |           |     |           |          |         |         | ENSG00000285051:intron;E |                 |                     |   |        |
| 3 | 170571293 | 170571506 | 214 | 170571299 | 3.6499   | 2.91341 | 0.30123 | NSG00000013293:intron;EN | ENSG00000013293 | 170459583-170586074 | - | 14675  |
|   |           |           |     |           |          |         |         | SG00000285218:intron     |                 |                     |   |        |
|   |           |           |     |           |          |         |         | ENSG00000285051:intron;E |                 |                     |   |        |
| 3 | 170572907 | 170573216 | 310 | 170573052 | 9.78373  | 4.69287 | 4.83465 | NSG00000013293:intron;EN | ENSG00000013293 | 170459583-170586074 | - | 13013  |
|   |           |           |     |           |          |         |         | SG00000285218:intron     |                 |                     |   |        |
| 3 | 170897016 | 170897336 | 321 | 170897209 | 5.31489  | 3.67153 | 1.09512 | ENSG00000163577:intron   | ENSG00000163577 | 170888414-170908693 | - | 11517  |
| 3 | 171754776 | 171755012 | 237 | 171754911 | 4.0114   | 3.13438 | 0.46103 | ENSG00000075651:intron   | ENSG00000075651 | 171600404-171810950 | - | 56056  |
| 3 | 172095189 | 172095421 | 233 | 172095314 | 8.17399  | 4.36112 | 3.38452 | ENSG00000075420:intron   | ENSG00000075420 | 172039627-172401665 | + | 55677  |
| 3 | 172235936 | 172236222 | 287 | 172236127 | 5.18253  | 3.59359 | 1.02124 | ENSG00000243398:Promoter | ENSG00000243398 | 172237325-172237591 | + | -1246  |
|   |           |           |     |           |          |         |         | :ENSG00000075420:intron  |                 |                     |   |        |
| 3 | 172242588 | 172242796 | 209 | 172242704 | 4.2748   | 3.0719  | 0.58762 | ENSG00000075420:intron   | ENSG00000243398 | 172237325-172237591 | + | 5366   |
| 3 | 173596705 | 173597055 | 351 | 173596798 | 5.60156  | 3.98839 | 1.26447 | ENSG00000169760:intron   | ENSG00000237645 | 173644230-173644711 | + | -47350 |
| 3 | 173612458 | 173612695 | 238 | 173612462 | 3.81246  | 2.91013 | 0.32594 | ENSG00000169760:intron   | ENSG00000237645 | 173644230-173644711 | + | -31654 |
| 3 | 173920478 | 173920743 | 266 | 173920600 | 10.01593 | 5.14387 | 5.02923 | ENSG00000169760:intron;E | ENSG00000228213 | 173910497-173920796 | - | 186    |
|   |           |           |     |           |          |         |         | NSG00000228213:exon      |                 |                     |   |        |
| 3 | 174241770 | 174241985 | 216 | 174241877 | 3.20396  | 2.64557 | 0.26167 | ENSG00000169760:intron   | ENSG00000232601 | 174302943-174303287 | - | 61410  |
| 3 | 174321702 | 174322031 | 330 | 174321983 | 3.92092  | 3.18945 | 0.4041  | intergenic               | ENSG00000232601 | 174302943-174303287 | - | -18579 |
| 3 | 174613027 | 174613275 | 249 | 174613141 | 6.07934  | 3.97749 | 1.63735 | intergenic               | ENSG00000253020 | 174631822-174632064 | + | -18671 |
| 3 | 175150825 | 175151191 | 367 | 175151073 | 3.20396  | 2.64557 | 0.26167 | ENSG00000177694:intron   | ENSG00000230292 | 175079306-175115242 | - | -35765 |
| 3 | 175177719 | 175178008 | 290 | 175177940 | 3.45699  | 2.99296 | 0.30123 | ENSG00000177694:intron   | ENSG00000230292 | 175079306-175115242 | - | -62621 |
| 3 | 175150825 | 175151191 | 367 | 175151073 | 3.20396  | 2.64557 | 0.26167 | ENSG00000177694:intron   | ENSG00000230292 | 175079306-175115242 | - | -35765 |
| 3 | 175177719 | 175178008 | 290 | 175177940 | 3.45699  | 2.99296 | 0.30123 | ENSG00000177694:intron   | ENSG00000230292 | 175079306-175115242 | - | -62621 |
| 3 | 175194170 | 175194466 | 297 | 175194322 | 10.60166 | 5.08797 | 5.56659 | ENSG00000177694:intron   | ENSG00000226779 | 175234860-175271096 | - | 76778  |
| 3 | 175317078 | 175317299 | 222 | 175317107 | 3.02441  | 2.62206 | 0.15111 | ENSG00000177694:intron   | ENSG00000226779 | 175234860-175271096 | - | -46092 |
| 3 | 175332524 | 175332752 | 229 | 175332658 | 5.79352  | 3.81213 | 1.40054 | ENSG00000177694:intron   | ENSG00000264974 | 175369539-175369621 | + | -36901 |
| 3 | 175347008 | 175347248 | 241 | 175347155 | 7.75292  | 4.61946 | 3.02978 | ENSG00000177694:intron   | ENSG00000264974 | 175369539-175369621 | + | -22411 |
| 3 | 175332524 | 175332752 | 229 | 175332658 | 5.79352  | 3.81213 | 1.40054 | ENSG00000177694:intron   | ENSG00000264974 | 175369539-175369621 | + | -36901 |
| 3 | 175347008 | 175347248 | 241 | 175347155 | 7.75292  | 4.61946 | 3.02978 | ENSG00000177694:intron   | ENSG00000264974 | 175369539-175369621 | + | -22411 |
| 3 | 176055285 | 176055693 | 409 | 176055674 | 4.12863  | 3.32301 | 0.50868 | intergenic               | ENSG00000236357 | 176068041-176068908 | - | 13419  |
| 3 | 176157884 | 176158098 | 215 | 176158004 | 5.52306  | 3.79499 | 1.20409 | intergenic               | ENSG00000238026 | 176113701-176114537 | - | -43453 |
| 3 | 176842333 | 176842569 | 237 | 176842521 | 5.01585  | 3.49609 | 0.89533 | ENSG00000232461:intron   | ENSG00000232461 | 176643940-176867838 | - | 25387  |
| 3 | 177359918 | 177360163 | 246 | 177360034 | 11.55211 | 4.89096 | 6.42066 | intergenic               | ENSG00000226782 | 177337627-177349166 | - | -10874 |
| 3 | 177527038 | 177527259 | 222 | 177527206 | 6.12405  | 4.00354 | 1.67582 | ENSG00000228221:intron   | ENSG00000252028 | 177503302-177503552 | - | -23596 |
| 3 | 177589954 | 177590279 | 326 | 177590105 | 12.96187 | 5.8878  | 7.72149 | ENSG00000228221:intron   | ENSG00000200288 | 177624281-177624409 | - | 34293  |
| 3 | 178320402 | 178320669 | 268 | 178320481 | 6.19969  | 4.04772 | 1.74352 | ENSG00000197584:intron;E | ENSG00000197584 | 178272931-178844429 | + | 47604  |
|   |           |           |     |           |          |         |         | NSG00000223930:intron    |                 |                     |   |        |



|   |           |           |     |           |          |         |         |                                                             |                 |                     |   |         |
|---|-----------|-----------|-----|-----------|----------|---------|---------|-------------------------------------------------------------|-----------------|---------------------|---|---------|
| 3 | 178518863 | 178519406 | 544 | 178519295 | 10.65162 | 5.29115 | 5.60305 | ENSG00000197584:intron;E<br>NSG00000275163:intron           | ENSG00000271131 | 178493326-178493810 | - | -25324  |
| 3 | 179645971 | 179646439 | 469 | 179646067 | 5.55174  | 3.81208 | 1.22965 | intergenic                                                  | ENSG00000243977 | 179649493-179650200 | - | 3995    |
| 3 | 181219355 | 181219750 | 396 | 181219406 | 5.15664  | 3.57839 | 1.00126 | ENSG00000242808:intron                                      | ENSG00000206932 | 181231736-181231843 | + | -12184  |
| 3 | 181739407 | 181739704 | 298 | 181739451 | 3.6499   | 2.91341 | 0.30123 | ENSG00000242808:intron                                      | ENSG00000278026 | 181715184-181715293 | + | 24371   |
| 3 | 181955641 | 181955876 | 236 | 181955799 | 8.13775  | 4.49748 | 3.3598  | ENSG00000242512:intron                                      | ENSG00000242512 | 181952342-182010678 | + | 3416    |
| 3 | 182325516 | 182325953 | 438 | 182325762 | 7.58982  | 3.93998 | 2.87738 | intergenic                                                  | ENSG00000242012 | 182365146-182368256 | + | -39412  |
| 3 | 183156828 | 183157073 | 246 | 183156862 | 3.30754  | 2.7073  | 0.30123 | ENSG00000078081:intron                                      | ENSG00000078081 | 183122212-183163839 | - | 6889    |
| 3 | 183285845 | 183286077 | 233 | 183285923 | 5.20495  | 2.89643 | 1.04033 | ENSG00000176597:intron;E<br>NSG00000053524:intron           | ENSG00000202502 | 183258299-183258416 | - | -27544  |
| 3 | 183307043 | 183307411 | 369 | 183307113 | 6.21409  | 3.77143 | 1.75458 | ENSG00000053524:intron                                      | ENSG00000202502 | 183258299-183258416 | - | -48810  |
| 3 | 183285845 | 183286077 | 233 | 183285923 | 5.20495  | 2.89643 | 1.04033 | ENSG00000176597:intron;E<br>NSG00000053524:intron           | ENSG00000202502 | 183258299-183258416 | - | -27544  |
| 3 | 183307043 | 183307411 | 369 | 183307113 | 6.21409  | 3.77143 | 1.75458 | ENSG00000053524:intron                                      | ENSG00000202502 | 183258299-183258416 | - | -48810  |
| 3 | 183583689 | 183583948 | 260 | 183583878 | 3.81246  | 2.91013 | 0.32594 | intergenic                                                  | ENSG00000172578 | 183487530-183555689 | - | -28129  |
| 3 | 184646235 | 184646861 | 627 | 184646406 | 7.04714  | 4.22304 | 2.42833 | intergenic                                                  | ENSG00000177383 | 184710366-184712002 | - | 65454   |
| 3 | 185537454 | 185537723 | 270 | 185537512 | 3.64915  | 2.8159  | 0.30123 | ENSG00000163898:intron                                      | ENSG00000163898 | 185506261-185552613 | - | 15025   |
| 3 | 185547294 | 185547498 | 205 | 185547386 | 4.67312  | 2.89995 | 0.67699 | ENSG00000163898:intron                                      | ENSG00000163898 | 185506261-185552613 | - | 5217    |
| 3 | 185537454 | 185537723 | 270 | 185537512 | 3.64915  | 2.8159  | 0.30123 | ENSG00000163898:intron                                      | ENSG00000163898 | 185506261-185552613 | - | 15025   |
| 3 | 185547294 | 185547498 | 205 | 185547386 | 4.67312  | 2.89995 | 0.67699 | ENSG00000163898:intron                                      | ENSG00000163898 | 185506261-185552613 | - | 5217    |
| 3 | 186278892 | 186279153 | 262 | 186278904 | 4.31475  | 3.20475 | 0.59373 | ENSG00000058866:intron                                      | ENSG00000058866 | 186105667-186362237 | - | 83215   |
| 3 | 186292474 | 186292697 | 224 | 186292514 | 4.25006  | 3.16641 | 0.57329 | ENSG00000058866:intron                                      | ENSG00000058866 | 186105667-186362237 | - | 69652   |
| 3 | 186278892 | 186279153 | 262 | 186278904 | 4.31475  | 3.20475 | 0.59373 | ENSG00000058866:intron                                      | ENSG00000058866 | 186105667-186362237 | - | 83215   |
| 3 | 186292474 | 186292697 | 224 | 186292514 | 4.25006  | 3.16641 | 0.57329 | ENSG00000058866:intron                                      | ENSG00000058866 | 186105667-186362237 | - | 69652   |
| 3 | 187065311 | 187065557 | 247 | 187065393 | 5.3206   | 3.11019 | 1.09512 | ENSG00000073849:intron                                      | ENSG00000163923 | 187120947-187180908 | - | 115474  |
| 3 | 187130796 | 187131052 | 257 | 187130884 | 11.3518  | 5.86412 | 6.24499 | ENSG00000163923:intron                                      | ENSG00000163923 | 187120947-187180908 | - | 49984   |
| 3 | 187065311 | 187065557 | 247 | 187065393 | 5.3206   | 3.11019 | 1.09512 | ENSG00000073849:intron                                      | ENSG00000163923 | 187120947-187180908 | - | 115474  |
| 3 | 187130796 | 187131052 | 257 | 187130884 | 11.3518  | 5.86412 | 6.24499 | ENSG00000163923:intron                                      | ENSG00000163923 | 187120947-187180908 | - | 49984   |
| 3 | 188831834 | 188832043 | 210 | 188831860 | 3.43291  | 2.87851 | 0.30123 | ENSG00000145012:intron                                      | ENSG00000188001 | 188947213-189325304 | + | -115275 |
| 3 | 188875524 | 188875783 | 260 | 188875620 | 4.55755  | 3.47401 | 0.59373 | ENSG00000145012:exon;ENS<br>G00000145012:three_prime<br>UTR | ENSG00000188001 | 188947213-189325304 | + | -71560  |
| 3 | 189194249 | 189194479 | 231 | 189194410 | 3.6499   | 2.91341 | 0.30123 | ENSG00000188001:intron                                      | ENSG00000230115 | 189238685-189240594 | - | 46230   |
| 3 | 192893045 | 192893301 | 257 | 192893204 | 7.69969  | 3.86859 | 2.97966 | ENSG00000180611:intron                                      | ENSG00000180611 | 192796814-192918161 | - | 24988   |
| 3 | 193012077 | 193012394 | 318 | 193012132 | 5.01585  | 3.49609 | 0.89533 | intergenic                                                  | ENSG00000180611 | 192796814-192918161 | - | -94074  |
| 3 | 192893045 | 192893301 | 257 | 192893204 | 7.69969  | 3.86859 | 2.97966 | ENSG00000180611:intron                                      | ENSG00000180611 | 192796814-192918161 | - | 24988   |
| 3 | 193012077 | 193012394 | 318 | 193012132 | 5.01585  | 3.49609 | 0.89533 | intergenic                                                  | ENSG00000180611 | 192796814-192918161 | - | -94074  |
| 3 | 193963381 | 193963627 | 247 | 193963481 | 5.045    | 3.38939 | 0.91868 | ENSG00000214146:intron                                      | ENSG00000238043 | 193980613-194006098 | + | -17109  |
| 3 | 194785493 | 194785717 | 225 | 194785512 | 5.13473  | 3.43925 | 0.98202 | intergenic                                                  | ENSG00000230401 | 194765237-194768712 | - | -16892  |
| 3 | 195269196 | 195269433 | 238 | 195269384 | 5.09679  | 3.30224 | 0.956   | ENSG00000173950:intron                                      | ENSG00000173950 | 195068278-195271167 | - | 1853    |
| 3 | 195340359 | 195340596 | 238 | 195340581 | 3.81246  | 2.91013 | 0.32594 | ENSG00000114331:intron                                      | ENSG00000227433 | 195349663-195350030 | + | -9186   |
| 3 | 196020645 | 196020902 | 258 | 196020837 | 3.6499   | 2.91341 | 0.30123 | intergenic                                                  | ENSG00000228413 | 196044694-196045254 | + | -23921  |
| 3 | 196274653 | 196274894 | 242 | 196274762 | 7.40928  | 4.11883 | 2.71399 | ENSG00000161217:intron;E<br>NSG00000272741:intron           | ENSG00000161217 | 196214221-196287957 | - | 13184   |
| 3 | 197712355 | 197712639 | 285 | 197712398 | 4.92533  | 3.11051 | 0.829   | ENSG00000145016:intron                                      | ENSG00000122068 | 197737178-197787596 | + | -24681  |
| 3 | 198153833 | 198154163 | 331 | 198153837 | 3.34993  | 2.92244 | 0.30123 | intergenic                                                  | ENSG00000236438 | 198153286-198222513 | + | 711     |
| 3 | 198154885 | 198155155 | 271 | 198155005 | 3.03786  | 2.80302 | 0.15111 | intergenic                                                  | ENSG00000236438 | 198153286-198222513 | + | 1733    |
| 3 | 198153833 | 198154163 | 331 | 198153837 | 3.34993  | 2.92244 | 0.30123 | intergenic                                                  | ENSG00000236438 | 198153286-198222513 | + | 711     |
| 3 | 198154885 | 198155155 | 271 | 198155005 | 3.03786  | 2.80302 | 0.15111 | intergenic                                                  | ENSG00000236438 | 198153286-198222513 | + | 1733    |
| 4 | 2746212   | 2746523   | 312 | 2746371   | 7.84906  | 4.50457 | 3.11977 | ENSG00000168884:intron                                      | ENSG00000168884 | 2741647-2756376     | - | 10009   |
| 4 | 4075193   | 4075437   | 245 | 4075229   | 4.56295  | 3.60388 | 0.59373 | ENSG00000284727:intron                                      | ENSG00000243894 | 4076710-4077491     | - | 2176    |

|   |          |          |     |          |           |           |           |                          |                 |                   |   |         |
|---|----------|----------|-----|----------|-----------|-----------|-----------|--------------------------|-----------------|-------------------|---|---------|
| 4 | 4248029  | 4248278  | 250 | 4248261  | 3. 6499   | 2. 91341  | 0. 30123  | ENSG00000132406:Promoter | ENSG00000132406 | 4235541-4248212   | - | 59      |
| 4 | 4987257  | 4987852  | 596 | 4987465  | 4. 62651  | 3. 51732  | 0. 63659  | intergenic               | ENSG00000170891 | 5014585-5019472   | - | 31918   |
| 4 | 5006563  | 5006801  | 239 | 5006661  | 4. 55072  | 3. 59595  | 0. 59373  | intergenic               | ENSG00000170891 | 5014585-5019472   | - | 12790   |
| 4 | 7058073  | 7058339  | 267 | 7058112  | 5. 11088  | 3. 68528  | 0. 9653   | intergenic               | ENSG00000109519 | 7058905-7068197   | - | 9991    |
| 4 | 9604716  | 9604986  | 271 | 9604758  | 3. 88371  | 3. 16559  | 0. 37576  | intergenic               | ENSG00000249799 | 9583941-9584131   | - | -20719  |
| 4 | 9841925  | 9842197  | 273 | 9842137  | 4. 56295  | 3. 60388  | 0. 59373  | ENSG00000109667:intron   | ENSG00000252002 | 9792750-9792861   | - | -49199  |
| 4 | 10234898 | 10235193 | 296 | 10234973 | 8. 1168   | 5. 20561  | 3. 35333  | intergenic               | ENSG00000271544 | 10238212-10238235 | - | 3190    |
| 4 | 10702685 | 10702901 | 217 | 10702782 | 5. 39424  | 4. 00432  | 1. 09512  | intergenic               | ENSG00000249334 | 10685002-10697661 | + | 17790   |
| 4 | 11480602 | 11480950 | 349 | 11480765 | 5. 39424  | 4. 00432  | 1. 09512  | intergenic               | ENSG00000251152 | 11469249-11478196 | + | 11526   |
| 4 | 17336656 | 17336968 | 313 | 17336832 | 10. 54093 | 5. 83399  | 5. 51529  | intergenic               | ENSG00000206780 | 17320745-17320882 | - | -15929  |
| 4 | 18356278 | 18356489 | 212 | 18356353 | 4. 56295  | 3. 60388  | 0. 59373  | intergenic               | ENSG00000251048 | 18488061-18489508 | - | 133125  |
| 4 | 18378266 | 18378497 | 232 | 18378278 | 4. 1849   | 3. 24157  | 0. 52478  | intergenic               | ENSG00000251048 | 18488061-18489508 | - | 111127  |
| 4 | 18466993 | 18467325 | 333 | 18467210 | 5. 39424  | 4. 00432  | 1. 09512  | intergenic               | ENSG00000251048 | 18488061-18489508 | - | 22349   |
| 4 | 18503802 | 18504181 | 380 | 18504079 | 3. 34993  | 2. 92244  | 0. 30123  | intergenic               | ENSG00000251048 | 18488061-18489508 | - | -14483  |
| 4 | 18702868 | 18703126 | 259 | 18702951 | 3. 77589  | 3. 20345  | 0. 30123  | intergenic               | ENSG00000251048 | 18488061-18489508 | - | -213488 |
| 4 | 18934436 | 18934716 | 281 | 18934484 | 3. 49438  | 2. 91742  | 0. 30123  | intergenic               | ENSG00000279918 | 19098198-19098740 | + | -163622 |
| 4 | 21120066 | 21120359 | 294 | 21120183 | 8. 1168   | 5. 20561  | 3. 35333  | ENSG00000185774:intron   | ENSG00000250243 | 21304541-21316485 | + | -184329 |
| 4 | 21244088 | 21244385 | 298 | 21244311 | 3. 77589  | 3. 20345  | 0. 30123  | ENSG00000185774:intron   | ENSG00000250243 | 21304541-21316485 | + | -60305  |
| 4 | 21355827 | 21356114 | 288 | 21356047 | 3. 03786  | 2. 80302  | 0. 15111  | ENSG00000185774:intron   | ENSG00000250243 | 21304541-21316485 | + | 51429   |
| 4 | 25539761 | 25539980 | 220 | 25539928 | 3. 40931  | 2. 96154  | 0. 30123  | intergenic               | ENSG00000248608 | 25504996-25506675 | + | 34874   |
| 4 | 26262741 | 26262981 | 241 | 26262935 | 3. 03786  | 2. 80302  | 0. 15111  | ENSG00000168214:intron   | ENSG00000168214 | 26163454-26435131 | + | 99406   |
| 4 | 27791080 | 27791289 | 210 | 27791158 | 3. 34993  | 2. 92244  | 0. 30123  | intergenic               | ENSG00000251410 | 27967722-27985063 | - | 193879  |
| 4 | 27814028 | 27814331 | 304 | 27814212 | 8. 1168   | 5. 20561  | 3. 35333  | intergenic               | ENSG00000251410 | 27967722-27985063 | - | 170884  |
| 4 | 33973025 | 33973256 | 232 | 33973074 | 3. 88371  | 3. 16559  | 0. 37576  | ENSG00000250723:intron;E | ENSG00000239983 | 33968173-33968526 | + | 4967    |
| 4 | 38132321 | 38132591 | 271 | 38132463 | 8. 0161   | 4. 5963   | 3. 27031  | NSG00000250954:intron    | ENSG00000249649 | 38006783-38007105 | - | -125350 |
| 4 | 38306693 | 38306929 | 237 | 38306813 | 5. 75051  | 3. 78743  | 1. 36222  | ENSG00000065882:intron   | ENSG00000251642 | 38286993-38287491 | + | 19817   |
| 4 | 38752366 | 38752604 | 239 | 38752437 | 12. 35063 | 6. 66347  | 7. 14928  | intergenic               | ENSG00000222230 | 38758790-38758892 | - | 6407    |
| 4 | 38752366 | 38752604 | 239 | 38752437 | 12. 35063 | 6. 66347  | 7. 14928  | intergenic               | ENSG00000222230 | 38758790-38758892 | - | 6407    |
| 4 | 38996081 | 38996479 | 399 | 38996243 | 7. 96683  | 4. 92425  | 3. 22527  | ENSG00000121895:intron   | ENSG00000121895 | 38966743-39032922 | - | 36642   |
| 4 | 39770002 | 39770298 | 297 | 39770094 | 4. 47325  | 3. 54574  | 0. 59373  | ENSG00000078140:intron;E | ENSG00000180610 | 39770080-39771371 | - | 1221    |
| 4 | 40769779 | 40770003 | 225 | 40769914 | 5. 39424  | 4. 00432  | 1. 09512  | NSG00000180610:exon      | ENSG00000248780 | 40786109-40786710 | + | -16218  |
| 4 | 42167755 | 42167982 | 228 | 42167815 | 7. 57321  | 4. 69036  | 2. 86415  | ENSG00000179299:intron   | ENSG00000188848 | 42110937-42152878 | - | -14990  |
| 4 | 42437040 | 42437274 | 235 | 42437109 | 3. 6499   | 2. 91341  | 0. 30123  | ENSG00000285454:intron   | ENSG00000240167 | 42471809-42472380 | + | -34652  |
| 4 | 42529527 | 42529760 | 234 | 42529563 | 3. 88371  | 3. 16559  | 0. 37576  | ENSG00000124406:intron   | ENSG00000248283 | 42561456-42562425 | - | 32782   |
| 4 | 43835962 | 43836204 | 243 | 43836118 | 6. 09579  | 4. 29768  | 1. 6498   | intergenic               | ENSG00000239679 | 43863273-43863549 | + | -27190  |
| 4 | 48127959 | 48128461 | 503 | 48128170 | 36. 73342 | 13. 71756 | 30. 60637 | ENSG00000074966:intron   | ENSG00000074966 | 48066392-48134256 | - | 6046    |
| 4 | 49490044 | 49490330 | 287 | 49490223 | 3. 7121   | 2. 85213  | 0. 30123  | ENSG00000248583:Promoter | ENSG00000248583 | 49486925-49489554 | - | -632    |
| 4 | 49494193 | 49494396 | 204 | 49494246 | 4. 40096  | 2. 37427  | 0. 59373  | intergenic               | ENSG00000248583 | 49486925-49489554 | - | -4740   |
| 4 | 49709339 | 49709557 | 219 | 49709431 | 11. 88032 | 6. 15899  | 6. 72383  | intergenic               | ENSG00000249337 | 49588771-49589529 | + | 120676  |
| 4 | 49709339 | 49709557 | 219 | 49709431 | 11. 88032 | 6. 15899  | 6. 72383  | intergenic               | ENSG00000249337 | 49588771-49589529 | + | 120676  |
| 4 | 51896055 | 51896391 | 337 | 51896270 | 4. 56295  | 3. 60388  | 0. 59373  | ENSG00000109184:intron   | ENSG00000272576 | 51918771-51919381 | + | -22548  |
| 4 | 52035526 | 52035835 | 310 | 52035627 | 4. 12863  | 3. 32301  | 0. 50868  | ENSG00000163069:intron   | ENSG00000163069 | 52020705-52038482 | - | 2802    |
| 4 | 52701318 | 52701687 | 370 | 52701568 | 4. 12863  | 3. 32301  | 0. 50868  | intergenic               | ENSG00000226950 | 52712403-52720351 | + | -10901  |
| 4 | 52716419 | 52716635 | 217 | 52716527 | 4. 88847  | 3. 6826   | 0. 81688  | ENSG00000226950:intron   | ENSG00000212588 | 52713248-52713370 | + | 3278    |
| 4 | 53688247 | 53688477 | 231 | 53688325 | 7. 40928  | 4. 11883  | 2. 71399  | ENSG00000249341:intron;E | ENSG00000072201 | 53459300-53701405 | - | 13043   |
| 4 | 54771208 | 54771633 | 426 | 54771332 | 5. 39424  | 4. 00432  | 1. 09512  | NSG00000282278:intron    | ENSG00000249727 | 54836160-54845402 | - | 73982   |
| 4 | 55239393 | 55239932 | 540 | 55239547 | 5. 24168  | 3. 90698  | 1. 06394  | intergenic               | ENSG00000250812 | 55219343-55219973 | + | 20319   |
| 4 | 59590283 | 59590633 | 351 | 59590364 | 3. 77589  | 3. 20345  | 0. 30123  | intergenic               | ENSG00000249392 | 59551141-59630324 | - | 39866   |

|   |           |           |     |           |          |         |         |                                                   |                 |                     |   |         |
|---|-----------|-----------|-----|-----------|----------|---------|---------|---------------------------------------------------|-----------------|---------------------|---|---------|
| 4 | 59639265  | 59639470  | 206 | 59639392  | 3.77589  | 3.20345 | 0.30123 | intergenic                                        | ENSG00000249392 | 59551141-59630324   | - | -9043   |
| 4 | 64001289  | 64001538  | 250 | 64001423  | 9.22287  | 5.47958 | 4.30742 | intergenic                                        | ENSG00000252104 | 64397693-64397787   | - | 396374  |
| 4 | 64290151  | 64290402  | 252 | 64290354  | 3.34993  | 2.92244 | 0.30123 | ENSG00000205678:intron                            | ENSG00000252104 | 64397693-64397787   | - | 107511  |
| 4 | 64816575  | 64816988  | 414 | 64816840  | 5.39424  | 4.00432 | 1.09512 | intergenic                                        | ENSG00000244669 | 64767129-64767897   | - | -48884  |
| 4 | 66014390  | 66014744  | 355 | 66014419  | 3.34993  | 2.92244 | 0.30123 | ENSG00000249413:intron;E<br>NSG00000272304:intron | ENSG00000272304 | 66003280-66016792   | + | 11286   |
| 4 | 66901720  | 66902126  | 407 | 66901786  | 4.56295  | 3.60388 | 0.59373 | intergenic                                        | ENSG00000252890 | 66897261-66897371   | + | 4661    |
| 4 | 66911955  | 66912258  | 304 | 66912108  | 9.07088  | 5.59371 | 4.18166 | intergenic                                        | ENSG00000252890 | 66897261-66897371   | + | 14845   |
| 4 | 72003496  | 72003703  | 208 | 72003596  | 4.919    | 3.70193 | 0.82412 | intergenic                                        | ENSG00000056291 | 72031803-72148067   | + | -28204  |
| 4 | 72112566  | 72112857  | 292 | 72112718  | 8.1168   | 5.20561 | 3.35333 | ENSG00000056291:intron                            | ENSG00000056291 | 72031803-72148067   | + | 80908   |
| 4 | 72703833  | 72704102  | 270 | 72703964  | 3.03786  | 2.80302 | 0.15111 | intergenic                                        | ENSG00000270665 | 72807266-72808192   | + | -103299 |
| 4 | 72809451  | 72809780  | 330 | 72809536  | 3.49438  | 2.91742 | 0.30123 | intergenic                                        | ENSG00000270665 | 72807266-72808192   | + | 2349    |
| 4 | 75555870  | 75556146  | 277 | 75555968  | 11.53275 | 5.55571 | 6.4016  | ENSG00000174792:Promoter                          | ENSG00000174792 | 75556047-75565885   | + | -39     |
| 4 | 75967312  | 75967533  | 222 | 75967403  | 5.17447  | 3.86417 | 1.0143  | ENSG00000198301:intron                            | ENSG00000245928 | 75980789-76005942   | + | -13367  |
| 4 | 76199682  | 76199905  | 224 | 76199805  | 6.58155  | 3.96836 | 2.01637 | ENSG00000138760:intron                            | ENSG00000189157 | 76214039-76283780   | + | -14246  |
| 4 | 76735354  | 76735594  | 241 | 76735497  | 3.77589  | 3.20345 | 0.30123 | ENSG00000138771:intron                            | ENSG00000233860 | 76756959-76758474   | - | 23000   |
| 4 | 76991127  | 76991457  | 331 | 76991335  | 5.14139  | 3.84312 | 0.98688 | ENSG00000138758:intron                            | ENSG00000234036 | 76958859-76959169   | - | -32122  |
| 4 | 77425177  | 77425538  | 362 | 77425534  | 3.02441  | 2.62206 | 0.15111 | ENSG00000138764:intron;E<br>NSG00000249036:intron | ENSG00000249036 | 77394490-77494286   | - | 68929   |
| 4 | 77923069  | 77923328  | 260 | 77923153  | 3.02441  | 2.62206 | 0.15111 | ENSG00000169288:intron                            | ENSG00000248926 | 77957999-77958780   | - | 35582   |
| 4 | 77934869  | 77935115  | 247 | 77935098  | 5.68188  | 3.88989 | 1.31322 | ENSG00000169288:intron                            | ENSG00000248926 | 77957999-77958780   | - | 23788   |
| 4 | 80509651  | 80509970  | 320 | 80509783  | 5.39424  | 4.00432 | 1.09512 | ENSG00000197826:intron                            | ENSG00000232327 | 80386177-80388716   | - | -121094 |
| 4 | 81257909  | 81258187  | 279 | 81258018  | 4.87332  | 3.67301 | 0.80353 | intergenic                                        | ENSG00000138669 | 81087369-81215117   | - | -42930  |
| 4 | 81550725  | 81550950  | 226 | 81550836  | 3.77589  | 3.20345 | 0.30123 | ENSG00000138670:intron                            | ENSG00000248282 | 81733384-81734207   | - | 183370  |
| 4 | 81631954  | 81632177  | 224 | 81632045  | 6.57074  | 4.43068 | 2.0119  | ENSG00000138670:intron                            | ENSG00000248282 | 81733384-81734207   | - | 102142  |
| 4 | 81725112  | 81725414  | 303 | 81725246  | 15.03591 | 6.29939 | 9.62995 | ENSG00000138670:intron                            | ENSG00000248282 | 81733384-81734207   | - | 8944    |
| 4 | 81550725  | 81550950  | 226 | 81550836  | 3.77589  | 3.20345 | 0.30123 | ENSG00000138670:intron                            | ENSG00000248282 | 81733384-81734207   | - | 183370  |
| 4 | 81631954  | 81632177  | 224 | 81632045  | 6.57074  | 4.43068 | 2.0119  | ENSG00000138670:intron                            | ENSG00000248282 | 81733384-81734207   | - | 102142  |
| 4 | 81725112  | 81725414  | 303 | 81725246  | 15.03591 | 6.29939 | 9.62995 | ENSG00000138670:intron                            | ENSG00000248282 | 81733384-81734207   | - | 8944    |
| 4 | 82905232  | 82905529  | 298 | 82905370  | 12.86462 | 6.48314 | 7.62811 | ENSG00000168152:intron                            | ENSG00000138674 | 82818660-82901166   | - | -4214   |
| 4 | 86863726  | 86863965  | 240 | 86863766  | 4.07388  | 3.28775 | 0.47041 | intergenic                                        | ENSG00000243312 | 86870190-86871404   | + | -6345   |
| 4 | 87284477  | 87284727  | 251 | 87284607  | 4.99664  | 3.75114 | 0.88739 | intergenic                                        | ENSG00000263981 | 87300494-87300583   | - | 15981   |
| 4 | 88119059  | 88119342  | 284 | 88119236  | 6.26578  | 4.40475 | 1.75945 | ENSG00000118777:intron                            | ENSG00000241853 | 88163578-88163967   | + | -44378  |
| 4 | 89222190  | 89222497  | 308 | 89222288  | 11.05132 | 6.13235 | 5.96877 | intergenic                                        | ENSG00000185477 | 89236385-89308010   | - | 85667   |
| 4 | 89874570  | 89875034  | 465 | 89874852  | 6.26578  | 4.40475 | 1.75945 | intergenic                                        | ENSG00000138722 | 89879531-89954629   | + | -4729   |
| 4 | 93602305  | 93602633  | 329 | 93602454  | 5.39424  | 4.00432 | 1.09512 | ENSG00000152208:intron                            | ENSG00000252342 | 93820170-93820280   | + | -217701 |
| 4 | 93822435  | 93822703  | 269 | 93822541  | 4.56295  | 3.60388 | 0.59373 | intergenic                                        | ENSG00000252342 | 93820170-93820280   | + | 2398    |
| 4 | 93602305  | 93602633  | 329 | 93602454  | 5.39424  | 4.00432 | 1.09512 | ENSG00000152208:intron                            | ENSG00000252342 | 93820170-93820280   | + | -217701 |
| 4 | 93822435  | 93822703  | 269 | 93822541  | 4.56295  | 3.60388 | 0.59373 | intergenic                                        | ENSG00000252342 | 93820170-93820280   | + | 2398    |
| 4 | 97851049  | 97851279  | 231 | 97851092  | 4.42776  | 3.51628 | 0.59373 | ENSG00000163116:intron                            | ENSG00000250293 | 97916352-97917401   | - | 66237   |
| 4 | 99048145  | 99048415  | 271 | 99048357  | 6.09579  | 4.29768 | 1.6498  | ENSG00000164024:intron                            | ENSG00000272777 | 99067255-99068125   | - | 19845   |
| 4 | 99054341  | 99054605  | 265 | 99054380  | 3.77589  | 3.20345 | 0.30123 | ENSG00000164024:intron                            | ENSG00000272777 | 99067255-99068125   | - | 13652   |
| 4 | 100101157 | 100101409 | 253 | 100101261 | 7.98084  | 5.12163 | 3.23913 | ENSG00000245322:intron                            | ENSG00000248820 | 100041840-100042104 | - | -59178  |
| 4 | 100487632 | 100488017 | 386 | 100487746 | 3.42114  | 2.96933 | 0.30123 | ENSG00000164035:intron                            | ENSG00000250223 | 100660278-100675113 | - | 187289  |
| 4 | 101259934 | 101260237 | 304 | 101260089 | 14.89517 | 7.13146 | 9.49496 | ENSG00000138814:intron                            | ENSG00000273882 | 101240794-101240872 | - | -19213  |
| 4 | 101526503 | 101526867 | 365 | 101526784 | 4.56295  | 3.60388 | 0.59373 | ENSG00000153064:intron                            | ENSG00000153064 | 101411285-102074812 | + | 115399  |
| 4 | 102469784 | 102470035 | 252 | 102469889 | 4.56295  | 3.60388 | 0.59373 | intergenic                                        | ENSG00000251572 | 102461249-102462152 | + | 8660    |
| 4 | 103032461 | 103032816 | 356 | 103032656 | 4.50398  | 3.56566 | 0.59373 | ENSG00000164038:intron                            | ENSG00000164037 | 102885047-103019739 | - | -12899  |
| 4 | 105060581 | 105061031 | 451 | 105060802 | 15.2807  | 7.87943 | 9.85742 | ENSG00000248373:intron                            | ENSG00000251473 | 105102890-105104004 | - | 43198   |
| 4 | 105077891 | 105078140 | 250 | 105077947 | 4.57122  | 3.48259 | 0.60109 | ENSG00000248373:intron                            | ENSG00000251473 | 105102890-105104004 | - | 25989   |
| 4 | 105306312 | 105306622 | 311 | 105306479 | 10.09471 | 6.00647 | 5.09428 | intergenic                                        | ENSG00000243383 | 105293663-105293946 | + | 12803   |

|   |           |           |     |           |          |         |          |                          |                 |                     |   |         |
|---|-----------|-----------|-----|-----------|----------|---------|----------|--------------------------|-----------------|---------------------|---|---------|
| 4 | 106158259 | 106158509 | 251 | 106158380 | 5.56876  | 3.96799 | 1.238    | ENSG00000145348:intron   | ENSG00000249635 | 106003316-106022478 | - | -135905 |
| 4 | 107637896 | 107638141 | 246 | 107637935 | 3.03786  | 2.80302 | 0.15111  | ENSG00000138801:intron   | ENSG00000138801 | 107590275-107720452 | - | 82434   |
| 4 | 107755819 | 107756178 | 360 | 107756130 | 5.91134  | 4.18186 | 1.4976   | intergenic               | ENSG00000138801 | 107590275-107720452 | - | -35546  |
| 4 | 108118564 | 108118843 | 280 | 108118774 | 6.4824   | 4.21404 | 1.94623  | ENSG00000138795:intron   | ENSG00000232021 | 108167524-108256836 | + | -48821  |
| 4 | 111064355 | 111064674 | 320 | 111064495 | 17.81506 | 8.80949 | 12.26624 | intergenic               | ENSG00000251312 | 111063582-111064227 | + | 932     |
| 4 | 111268766 | 111269017 | 252 | 111268926 | 7.082    | 4.57252 | 2.45993  | intergenic               | ENSG00000200963 | 111331411-111331518 | + | -62520  |
| 4 | 111400674 | 111401035 | 362 | 111400780 | 4.56295  | 3.60388 | 0.59373  | intergenic               | ENSG00000200963 | 111331411-111331518 | + | 69443   |
| 4 | 111414782 | 111415099 | 318 | 111415057 | 3.77589  | 3.20345 | 0.30123  | intergenic               | ENSG00000200963 | 111331411-111331518 | + | 83529   |
| 4 | 111435270 | 111435488 | 219 | 111435291 | 3.77589  | 3.20345 | 0.30123  | intergenic               | ENSG00000200963 | 111331411-111331518 | + | 103967  |
| 4 | 111268766 | 111269017 | 252 | 111268926 | 7.082    | 4.57252 | 2.45993  | intergenic               | ENSG00000200963 | 111331411-111331518 | + | -62520  |
| 4 | 111400674 | 111401035 | 362 | 111400780 | 4.56295  | 3.60388 | 0.59373  | intergenic               | ENSG00000200963 | 111331411-111331518 | + | 69443   |
| 4 | 111414782 | 111415099 | 318 | 111415057 | 3.77589  | 3.20345 | 0.30123  | intergenic               | ENSG00000200963 | 111331411-111331518 | + | 83529   |
| 4 | 111435270 | 111435488 | 219 | 111435291 | 3.77589  | 3.20345 | 0.30123  | intergenic               | ENSG00000200963 | 111331411-111331518 | + | 103967  |
| 4 | 120223973 | 120224232 | 260 | 120224155 | 5.39424  | 4.00432 | 1.09512  | ENSG00000250938:intron   | ENSG00000225665 | 120342055-120342647 | + | -117953 |
| 4 | 123588660 | 123588926 | 267 | 123588865 | 5.8578   | 4.14832 | 1.45441  | intergenic               | ENSG00000249464 | 123650266-123930406 | + | -61473  |
| 4 | 123966400 | 123966669 | 270 | 123966553 | 3.49438  | 2.91742 | 0.30123  | intergenic               | ENSG00000250484 | 124062461-124062990 | + | -95927  |
| 4 | 124102337 | 124102556 | 220 | 124102531 | 3.34993  | 2.92244 | 0.30123  | intergenic               | ENSG00000250484 | 124062461-124062990 | + | 39985   |
| 4 | 124685107 | 124685343 | 237 | 124685165 | 3.53038  | 3.04135 | 0.30123  | ENSG00000151458:intron   | ENSG00000151458 | 124664051-124712732 | - | 27507   |
| 4 | 127216213 | 127216441 | 229 | 127216356 | 4.84177  | 3.65305 | 0.77787  | ENSG00000248491:intron   | ENSG00000250945 | 127043429-127077762 | - | -138564 |
| 4 | 127229500 | 127229725 | 226 | 127229537 | 4.56295  | 3.60388 | 0.59373  | ENSG00000248491:intron   | ENSG00000250945 | 127043429-127077762 | - | -151850 |
| 4 | 127235119 | 127235324 | 206 | 127235272 | 3.34993  | 2.92244 | 0.30123  | ENSG00000248491:intron   | ENSG00000250945 | 127043429-127077762 | - | -157459 |
| 4 | 128452611 | 128452923 | 313 | 128452744 | 4.1849   | 3.24157 | 0.52478  | ENSG00000251432:intron   | ENSG00000273077 | 128552589-128553416 | - | 100649  |
| 4 | 128552575 | 128552962 | 388 | 128552928 | 4.49742  | 2.90144 | 0.59373  | ENSG00000273077:intron   | ENSG00000273077 | 128552589-128553416 | - | 648     |
| 4 | 128452611 | 128452923 | 313 | 128452744 | 4.1849   | 3.24157 | 0.52478  | ENSG00000251432:intron   | ENSG00000273077 | 128552589-128553416 | - | 100649  |
| 4 | 128552575 | 128552962 | 388 | 128552928 | 4.49742  | 2.90144 | 0.59373  | ENSG00000273077:intron   | ENSG00000273077 | 128552589-128553416 | - | 648     |
| 4 | 128653659 | 128653902 | 244 | 128653763 | 5.39424  | 4.00432 | 1.09512  | intergenic               | ENSG00000248802 | 128582998-128601407 | - | -52373  |
| 4 | 141128209 | 141128468 | 260 | 141128358 | 4.98096  | 3.7412  | 0.87315  | ENSG00000170153:intron   | ENSG00000170153 | 140859806-141212877 | - | 84539   |
| 4 | 141152580 | 141152952 | 373 | 141152727 | 4.56295  | 3.60388 | 0.59373  | ENSG00000170153:intron   | ENSG00000170153 | 140859806-141212877 | - | 60111   |
| 4 | 141128209 | 141128468 | 260 | 141128358 | 4.98096  | 3.7412  | 0.87315  | ENSG00000170153:intron   | ENSG00000170153 | 140859806-141212877 | - | 84539   |
| 4 | 141152580 | 141152952 | 373 | 141152727 | 4.56295  | 3.60388 | 0.59373  | ENSG00000170153:intron   | ENSG00000170153 | 140859806-141212877 | - | 60111   |
| 4 | 142641321 | 142641589 | 269 | 142641561 | 3.77589  | 3.20345 | 0.30123  | ENSG00000249806:intron;E | ENSG00000249806 | 142566018-142660950 | + | 75436   |
| 4 | 142880628 | 142880855 | 228 | 142880669 | 4.22478  | 3.38503 | 0.55558  | intergenic               | ENSG00000109452 | 142023159-142847432 | - | -33309  |
| 4 | 142919928 | 142920221 | 294 | 142920029 | 3.77589  | 3.20345 | 0.30123  | intergenic               | ENSG00000109452 | 142023159-142847432 | - | -72642  |
| 4 | 143863885 | 143864119 | 235 | 143863998 | 4.56295  | 3.60388 | 0.59373  | ENSG00000251600:intron   | ENSG00000197465 | 143870866-143905563 | - | 41561   |
| 4 | 144502860 | 144503109 | 250 | 144502933 | 6.15301  | 4.33368 | 1.70124  | ENSG00000285713:intron;E | ENSG00000261129 | 144505899-144509001 | + | -2915   |
| 4 | 145455979 | 145456205 | 227 | 145456049 | 4.07388  | 3.28775 | 0.47041  | NSG00000285783:intron    | ENSG00000248745 | 145456004-145456844 | + | 87      |
| 4 | 148089745 | 148089952 | 208 | 148089853 | 3.658    | 3.12558 | 0.30123  | ENSG00000151623:intron   | ENSG00000250354 | 148146470-148208880 | + | -56622  |
| 4 | 148163660 | 148163948 | 289 | 148163665 | 5.11088  | 3.68528 | 0.9653   | ENSG00000151623:intron;E | ENSG00000250354 | 148146470-148208880 | + | 17333   |
| 4 | 148232011 | 148232270 | 260 | 148232144 | 3.77589  | 3.20345 | 0.30123  | NSG00000250354:intron    | ENSG00000250354 | 148146470-148208880 | + | 85670   |
| 4 | 150250338 | 150250609 | 272 | 150250421 | 3.77589  | 3.20345 | 0.30123  | ENSG00000170390:intron   | ENSG00000238721 | 150209705-150209768 | + | 40768   |
| 4 | 150288906 | 150289127 | 222 | 150288996 | 3.77589  | 3.20345 | 0.30123  | ENSG00000198589:intron   | ENSG00000238721 | 150209705-150209768 | + | 79311   |
| 4 | 151439233 | 151439665 | 433 | 151439336 | 4.56295  | 3.60388 | 0.59373  | ENSG00000164142:intron   | ENSG00000164142 | 151409215-151663632 | + | 30233   |
| 4 | 151798731 | 151798959 | 229 | 151798882 | 3.02441  | 2.62206 | 0.15111  | ENSG00000249184:Promoter | ENSG00000249184 | 151799499-151801348 | + | -654    |
| 4 | 152697000 | 152697229 | 230 | 152697124 | 7.86063  | 4.35185 | 3.13082  | intergenic               | ENSG00000170006 | 152618631-152680165 | - | -16949  |
| 4 | 152709487 | 152709859 | 373 | 152709743 | 4.54395  | 3.46548 | 0.59373  | intergenic               | ENSG00000170006 | 152618631-152680165 | - | -29507  |
| 4 | 153859074 | 153859279 | 206 | 153859255 | 4.22478  | 3.38503 | 0.55558  | intergenic               | ENSG00000145423 | 153780591-153789120 | - | -70056  |
| 4 | 153859074 | 153859279 | 206 | 153859255 | 4.22478  | 3.38503 | 0.55558  | intergenic               | ENSG00000145423 | 153780591-153789120 | - | -70056  |
| 4 | 158823478 | 158823835 | 358 | 158823669 | 9.23263  | 5.09091 | 4.31623  | ENSG00000052795:intron   | ENSG00000206703 | 158794589-158794696 | - | -28960  |

|   |           |           |     |           |          |          |          |                                                     |                 |                     |   |         |
|---|-----------|-----------|-----|-----------|----------|----------|----------|-----------------------------------------------------|-----------------|---------------------|---|---------|
| 4 | 163235531 | 163235814 | 284 | 163235759 | 3.64836  | 3.01523  | 0.30123  | intergenic                                          | ENSG00000250547 | 163265574-163266583 | - | 30911   |
| 4 | 165419939 | 165420142 | 204 | 165420092 | 3.77589  | 3.20345  | 0.30123  | ENSG00000109472:intron                              | ENSG00000251596 | 165404066-165406350 | - | -13690  |
| 4 | 165426873 | 165427228 | 356 | 165427061 | 4.56295  | 3.60388  | 0.59373  | ENSG00000109472:intron                              | ENSG00000251596 | 165404066-165406350 | - | -20700  |
| 4 | 169115283 | 169115515 | 233 | 169115308 | 4.84177  | 3.65305  | 0.77787  | ENSG00000154447:intron                              | ENSG00000214671 | 169166271-169167117 | + | -50872  |
| 4 | 172920997 | 172921235 | 239 | 172921131 | 5.24168  | 3.90698  | 1.06394  | ENSG00000174473:intron                              | ENSG00000241652 | 173141642-173141938 | + | -220526 |
| 4 | 173626034 | 173626323 | 290 | 173626273 | 4.56295  | 3.60388  | 0.59373  | ENSG00000237125:intron                              | ENSG00000213370 | 173633727-173634371 | + | 8193    |
| 4 | 173840041 | 173840285 | 245 | 173840061 | 4.56295  | 3.60388  | 0.59373  | intergenic                                          | ENSG00000250708 | 173897251-173929525 | + | -57088  |
| 4 | 174348192 | 174348443 | 252 | 174348339 | 3.77589  | 3.20345  | 0.30123  | intergenic                                          | ENSG00000249875 | 174354853-174376445 | - | 28128   |
| 4 | 174358924 | 174359162 | 239 | 174359036 | 4.1849   | 3.24157  | 0.52478  | ENSG00000249875:intron                              | ENSG00000249875 | 174354853-174376445 | - | 17402   |
| 4 | 175446039 | 175446355 | 317 | 175446339 | 3.34993  | 2.92244  | 0.30123  | intergenic                                          | ENSG00000249945 | 175458288-175466697 | - | 20500   |
| 4 | 176573122 | 176573424 | 303 | 176573311 | 4.84177  | 3.65305  | 0.77787  | intergenic                                          | ENSG00000248480 | 176631391-176633231 | - | 59958   |
| 4 | 176746091 | 176746321 | 231 | 176746157 | 4.1849   | 3.24157  | 0.52478  | ENSG00000150630:intron                              | ENSG00000150630 | 176683537-176792727 | - | 46521   |
| 4 | 179741966 | 179742250 | 285 | 179742025 | 5.38044  | 3.99551  | 1.09512  | intergenic                                          | ENSG00000248921 | 179856852-179857581 | + | -114744 |
| 4 | 181752545 | 181752782 | 238 | 181752629 | 6.36907  | 4.30669  | 1.85528  | intergenic                                          | ENSG00000251336 | 181820018-181829973 | - | 77310   |
| 4 | 181783765 | 181784010 | 246 | 181783840 | 4.56295  | 3.60388  | 0.59373  | intergenic                                          | ENSG00000251336 | 181820018-181829973 | - | 46086   |
| 4 | 184815517 | 184815740 | 224 | 184815626 | 6.43235  | 3.75515  | 1.9085   | ENSG00000251139:intron;E<br>NSG00000151726:intron   | ENSG00000251139 | 184813618-184821300 | + | 2010    |
| 4 | 185033986 | 185034292 | 307 | 185034171 | 7.082    | 4.57252  | 2.45993  | intergenic                                          | ENSG00000187821 | 185018840-185020804 | + | 15298   |
| 4 | 185413025 | 185413274 | 250 | 185413054 | 3.49438  | 2.91742  | 0.30123  | ENSG00000109775:intron                              | ENSG00000207231 | 185415972-185416086 | - | 2937    |
| 4 | 186147882 | 186148092 | 211 | 186148023 | 3.03786  | 2.80302  | 0.15111  | ENSG00000109794:intron                              | ENSG00000250327 | 186157895-186158843 | + | -9908   |
| 4 | 186162230 | 186162516 | 287 | 186162469 | 4.30996  | 3.44006  | 0.59373  | ENSG00000109794:intron                              | ENSG00000250327 | 186157895-186158843 | + | 4477    |
| 4 | 186899369 | 186899836 | 468 | 186899517 | 5.32771  | 3.96184  | 1.09512  | ENSG00000249539:Promoter                            | ENSG00000249539 | 186900539-186900838 | + | -937    |
| 4 | 189425468 | 189425675 | 208 | 189425629 | 3.34993  | 2.92244  | 0.30123  | intergenic                                          | ENSG00000205100 | 189472964-189475192 | + | -47393  |
| 4 | 189553381 | 189553648 | 268 | 189553523 | 5.39424  | 4.00432  | 1.09512  | intergenic                                          | ENSG00000205100 | 189472964-189475192 | + | 80550   |
| 4 | 189631229 | 189631553 | 325 | 189631408 | 11.1261  | 6.40691  | 6.0347   | intergenic                                          | ENSG00000250739 | 189659604-189661486 | + | -28213  |
| 4 | 190111107 | 190111426 | 320 | 190111305 | 4.2748   | 3.0719   | 0.58762  | intergenic                                          | ENSG00000280457 | 190091004-190092279 | + | 20262   |
| 5 | 4585151   | 4585449   | 299 | 4585271   | 5.39424  | 4.00432  | 1.09512  | ENSG00000248973:intron                              | ENSG00000251371 | 4640730-4648254     | + | -55430  |
| 5 | 6829467   | 6829752   | 286 | 6829613   | 11.18335 | 6.21019  | 6.08588  | ENSG00000251365:intron;E<br>NSG00000283420:Promoter | ENSG00000283420 | 6827852-6827921     | - | -1688   |
| 5 | 7672719   | 7672992   | 274 | 7672858   | 4.33895  | 3.45881  | 0.59373  | ENSG00000078295:intron                              | ENSG00000250761 | 7707801-7749766     | - | 76911   |
| 5 | 10765598  | 10765952  | 355 | 10765719  | 4.04884  | 3.27164  | 0.47041  | ENSG00000272324:intron                              | ENSG00000112977 | 10679229-10761272   | - | -4502   |
| 5 | 11050513  | 11050732  | 220 | 11050586  | 6.26578  | 4.40475  | 1.75945  | ENSG00000169862:intron                              | ENSG00000207312 | 11027199-11027307   | + | 23423   |
| 5 | 11052510  | 11052800  | 291 | 11052607  | 6.49439  | 4.38367  | 1.95029  | ENSG00000169862:intron                              | ENSG00000207312 | 11027199-11027307   | + | 25455   |
| 5 | 11068669  | 11068930  | 262 | 11068880  | 3.76522  | 3.1964   | 0.30123  | ENSG00000169862:intron                              | ENSG00000207312 | 11027199-11027307   | + | 41600   |
| 5 | 11082650  | 11082866  | 217 | 11082746  | 3.77589  | 3.20345  | 0.30123  | ENSG00000169862:exon                                | ENSG00000207312 | 11027199-11027307   | + | 55558   |
| 5 | 13624285  | 13624508  | 224 | 13624333  | 5.75307  | 4.08283  | 1.36357  | intergenic                                          | ENSG00000243744 | 13637918-13638381   | - | 13985   |
| 5 | 14613471  | 14613813  | 343 | 14613770  | 4.07388  | 3.28775  | 0.47041  | intergenic                                          | ENSG00000248791 | 14620019-14621313   | + | -6377   |
| 5 | 14809725  | 14810008  | 284 | 14809826  | 8.99866  | 4.4694   | 4.12107  | ENSG00000154122:intron                              | ENSG00000249485 | 14797124-14798400   | - | -11466  |
| 5 | 14918442  | 14918697  | 256 | 14918455  | 3.40931  | 2.96154  | 0.30123  | intergenic                                          | ENSG00000250662 | 14877666-14877919   | - | -40650  |
| 5 | 18698305  | 18698531  | 227 | 18698467  | 3.03786  | 2.80302  | 0.15111  | intergenic                                          | ENSG00000248693 | 18704432-18746173   | - | 47755   |
| 5 | 18746409  | 18746692  | 284 | 18746496  | 7.17425  | 4.80518  | 2.52654  | ENSG00000248693:Promoter                            | ENSG00000248693 | 18704432-18746173   | - | -377    |
| 5 | 24893028  | 24893449  | 422 | 24893188  | 6.26578  | 4.40475  | 1.75945  | intergenic                                          | ENSG00000250524 | 24881942-24885461   | - | -7777   |
| 5 | 27252949  | 27253314  | 366 | 27253076  | 25.71253 | 10.82179 | 19.88726 | intergenic                                          | ENSG00000113100 | 26880599-27121150   | + | -131981 |
| 5 | 27277506  | 27277715  | 210 | 27277603  | 4.56295  | 3.60388  | 0.59373  | intergenic                                          | ENSG00000113100 | 26880599-27121150   | - | -156460 |
| 5 | 29078716  | 29079228  | 513 | 29079032  | 6.26578  | 4.40475  | 1.75945  | intergenic                                          | ENSG00000252601 | 29070495-29070610   | + | 8476    |
| 5 | 32542642  | 32542907  | 266 | 32542786  | 13.56604 | 6.40949  | 8.26891  | ENSG00000113387:intron                              | ENSG00000113387 | 32531632-32604079   | + | 11142   |
| 5 | 33135154  | 33135385  | 232 | 33135282  | 4.919    | 3.70193  | 0.82412  | ENSG00000250697:intron                              | ENSG00000240376 | 33162178-33162807   | + | -26909  |
| 5 | 34959363  | 34959666  | 304 | 34959540  | 15.49818 | 8.00863  | 10.06014 | intergenic                                          | ENSG00000168724 | 34929558-34958964   | + | 29956   |
| 5 | 36310120  | 36310336  | 217 | 36310154  | 3.03786  | 2.80302  | 0.15111  | intergenic                                          | ENSG00000164188 | 36248433-36302114   | - | -8113   |
| 5 | 37465481  | 37465833  | 353 | 37465554  | 4.56295  | 3.60388  | 0.59373  | ENSG00000082068:intron                              | ENSG00000248216 | 37505687-37506857   | - | 41200   |
| 5 | 39077040  | 39077268  | 229 | 39077168  | 6.78327  | 4.56203  | 2.19117  | intergenic                                          | ENSG00000164327 | 38937918-39074408   | - | -2745   |

|   |          |          |     |          |          |         |          |                                                 |                 |                   |   |         |
|---|----------|----------|-----|----------|----------|---------|----------|-------------------------------------------------|-----------------|-------------------|---|---------|
| 5 | 39234592 | 39234924 | 333 | 39234748 | 4.07388  | 3.28775 | 0.47041  | ENSG00000082074:intron                          | ENSG00000082074 | 39105254-39274528 | - | 39770   |
| 5 | 39691870 | 39692260 | 391 | 39692167 | 3.58061  | 3.07449 | 0.30123  | intergenic                                      | ENSG00000250492 | 39718983-39721513 | - | 29448   |
| 5 | 40000774 | 40001105 | 332 | 40000954 | 4.56295  | 3.60388 | 0.59373  | ENSG00000250048:intron                          | ENSG00000249668 | 40066650-40067200 | + | -65711  |
| 5 | 41761846 | 41762113 | 268 | 41761969 | 4.07388  | 3.28775 | 0.47041  | ENSG00000083720:intron                          | ENSG00000248668 | 41870029-41872241 | + | -108050 |
| 5 | 41835711 | 41835963 | 253 | 41835791 | 6.26578  | 4.40475 | 1.75945  | ENSG00000083720:intron                          | ENSG00000248668 | 41870029-41872241 | + | -34192  |
| 5 | 42259594 | 42259870 | 277 | 42259821 | 3.77589  | 3.20345 | 0.30123  | intergenic                                      | ENSG00000260786 | 42188265-42191523 | + | 71466   |
| 5 | 42343592 | 42343831 | 240 | 42343637 | 5.2587   | 3.91783 | 1.07467  | intergenic                                      | ENSG00000112964 | 42423776-42721878 | + | -80065  |
| 5 | 42950685 | 42950948 | 264 | 42950868 | 8.17399  | 4.36112 | 3.38452  | intergenic                                      | ENSG00000250711 | 42972623-42973092 | + | -21807  |
| 5 | 50183378 | 50183622 | 245 | 50183503 | 3.77589  | 3.20345 | 0.30123  | intergenic                                      | ENSG00000170571 | 50396191-50443248 | - | 259748  |
| 5 | 50183378 | 50183622 | 245 | 50183503 | 3.77589  | 3.20345 | 0.30123  | intergenic                                      | ENSG00000170571 | 50396191-50443248 | - | 259748  |
| 5 | 52179930 | 52180159 | 230 | 52180016 | 3.63193  | 3.10837 | 0.30123  | intergenic                                      | ENSG00000244621 | 52282566-52282859 | + | -102522 |
| 5 | 54996648 | 54996928 | 281 | 54996801 | 6.26578  | 4.40475 | 1.75945  | ENSG00000164283:intron                          | ENSG00000164283 | 54977863-55022671 | - | 25883   |
| 5 | 55262248 | 55262463 | 216 | 55262355 | 3.03786  | 2.80302 | 0.15111  | ENSG00000067248:intron;ENSG00000251307:intron   | ENSG00000251307 | 55233933-55295201 | + | 28422   |
| 5 | 56148481 | 56148732 | 252 | 56148645 | 7.21064  | 4.47768 | 2.55784  | ENSG00000164512:intron;ENSG00000223003:Promoter | ENSG00000223003 | 56146738-56146846 | - | -1760   |
| 5 | 56328908 | 56329239 | 332 | 56329093 | 17.58419 | 7.57485 | 12.04595 | intergenic                                      | ENSG00000249697 | 56313904-56321397 | - | -7676   |
| 5 | 58527884 | 58528106 | 223 | 58527993 | 3.02441  | 2.62206 | 0.15111  | intergenic                                      | ENSG00000265699 | 58530042-58530109 | - | 2114    |
| 5 | 58648232 | 58648607 | 376 | 58648407 | 6.26578  | 4.40475 | 1.75945  | ENSG00000152932:intron                          | ENSG00000152932 | 58582220-58859394 | + | 66199   |
| 5 | 59233693 | 59234010 | 318 | 59233818 | 5.48809  | 3.9179  | 1.17181  | ENSG00000113448:intron                          | ENSG00000276214 | 59314109-59314800 | + | -80258  |
| 5 | 59413049 | 59413280 | 232 | 59413144 | 3.03786  | 2.80302 | 0.15111  | ENSG00000113448:intron                          | ENSG00000276214 | 59314109-59314800 | + | 99055   |
| 5 | 59512120 | 59512436 | 317 | 59512299 | 3.77589  | 3.20345 | 0.30123  | ENSG00000113448:intron                          | ENSG00000251306 | 59528860-59529251 | + | -16582  |
| 5 | 59562967 | 59563246 | 280 | 59563148 | 6.87919  | 4.45046 | 2.28002  | ENSG00000113448:intron                          | ENSG00000251306 | 59528860-59529251 | + | 34246   |
| 5 | 62678647 | 62678901 | 255 | 62678895 | 3.29424  | 2.88581 | 0.30123  | intergenic                                      | ENSG00000217416 | 62776876-62777263 | - | 98489   |
| 5 | 62681429 | 62681798 | 370 | 62681443 | 3.03786  | 2.80302 | 0.15111  | intergenic                                      | ENSG00000217416 | 62776876-62777263 | - | 95650   |
| 5 | 66149262 | 66149618 | 357 | 66149397 | 4.64049  | 3.52611 | 0.64891  | ENSG00000153914:intron                          | ENSG00000253744 | 66144155-66144795 | - | -4644   |
| 5 | 66730747 | 66731162 | 416 | 66731066 | 4.07388  | 3.28775 | 0.47041  | ENSG00000069020:intron                          | ENSG00000249057 | 66662330-66662988 | + | 68624   |
| 5 | 66829857 | 66830127 | 271 | 66829998 | 4.31475  | 3.20475 | 0.59373  | ENSG00000069020:intron                          | ENSG00000249057 | 66662330-66662988 | + | 167661  |
| 5 | 66730747 | 66731162 | 416 | 66731066 | 4.07388  | 3.28775 | 0.47041  | ENSG00000069020:intron                          | ENSG00000249057 | 66662330-66662988 | + | 68624   |
| 5 | 66829857 | 66830127 | 271 | 66829998 | 4.31475  | 3.20475 | 0.59373  | ENSG00000069020:intron                          | ENSG00000249057 | 66662330-66662988 | + | 167661  |
| 5 | 66840745 | 66841053 | 309 | 66840934 | 13.07138 | 7.09148 | 7.82275  | ENSG00000069020:intron                          | ENSG00000229666 | 67001382-67003953 | - | 163054  |
| 5 | 67006608 | 67006837 | 230 | 67006730 | 6.00239  | 4.23898 | 1.57533  | ENSG00000069020:intron                          | ENSG00000229666 | 67001382-67003953 | - | -2769   |
| 5 | 66840745 | 66841053 | 309 | 66840934 | 13.07138 | 7.09148 | 7.82275  | ENSG00000069020:intron                          | ENSG00000229666 | 67001382-67003953 | - | 163054  |
| 5 | 67006608 | 67006837 | 230 | 67006730 | 6.00239  | 4.23898 | 1.57533  | ENSG00000069020:intron                          | ENSG00000229666 | 67001382-67003953 | - | -2769   |
| 5 | 67206948 | 67207238 | 291 | 67207040 | 11.3238  | 6.29327 | 6.21788  | intergenic                                      | ENSG00000134061 | 67179612-67196799 | - | -10293  |
| 5 | 68434240 | 68434565 | 326 | 68434394 | 11.51664 | 5.74538 | 6.39216  | ENSG00000248884:exon                            | ENSG00000248884 | 68430426-68434481 | - | 79      |
| 5 | 71653595 | 71653989 | 395 | 71653927 | 4.07388  | 3.28775 | 0.47041  | ENSG00000131844:intron                          | ENSG00000164326 | 71719162-71721048 | + | -65370  |
| 5 | 72444113 | 72444331 | 219 | 72444223 | 4.35972  | 3.35026 | 0.59373  | ENSG00000178175:exon;ENSG00000261269:Promoter   | ENSG00000261269 | 72439902-72442387 | - | -1834   |
| 5 | 73464025 | 73464242 | 218 | 73464114 | 4.56295  | 3.60388 | 0.59373  | ENSG00000251324:intron                          | ENSG00000251324 | 73454186-73472896 | - | 8763    |
| 5 | 73485345 | 73485786 | 442 | 73485412 | 4.56295  | 3.60388 | 0.59373  | intergenic                                      | ENSG00000251324 | 73454186-73472896 | - | -12669  |
| 5 | 74327065 | 74327316 | 252 | 74327178 | 12.20111 | 6.5755  | 7.01985  | ENSG00000251041:intron;ENSG00000249343:intron   | ENSG00000249343 | 74322485-74328297 | + | 4705    |
| 5 | 74363201 | 74363485 | 285 | 74363308 | 4.56295  | 3.60388 | 0.59373  | intergenic                                      | ENSG00000250446 | 74327994-74334766 | - | -28576  |
| 5 | 75475244 | 75475513 | 270 | 75475485 | 4.16942  | 3.34931 | 0.52478  | ENSG00000113163:intron                          | ENSG00000122008 | 75511755-75601144 | + | -36377  |
| 5 | 78743547 | 78743824 | 278 | 78743643 | 5.24168  | 3.90698 | 1.06394  | intergenic                                      | ENSG00000254310 | 78753595-78753873 | + | -9910   |
| 5 | 79085587 | 79085949 | 363 | 79085867 | 4.1849   | 3.24157 | 0.52478  | ENSG00000132840:intron;ENSG00000132837:intron   | ENSG00000132840 | 79069716-79089466 | + | 16051   |
| 5 | 82403773 | 82404076 | 304 | 82403905 | 4.31475  | 3.20475 | 0.59373  | intergenic                                      | ENSG00000205464 | 82279461-82386977 | + | 124463  |
| 5 | 83653751 | 83653995 | 245 | 83653890 | 8.26347  | 5.10236 | 3.46049  | ENSG00000145681:intron                          | ENSG00000253073 | 83685865-83686018 | + | -31992  |
| 5 | 84063088 | 84063539 | 452 | 84063290 | 3.77589  | 3.20345 | 0.30123  | ENSG00000164176:intron                          | ENSG00000252861 | 84196882-84196989 | + | -133569 |

|   |           |           |     |           |          |         |          |                                                                           |                 |                     |   |        |
|---|-----------|-----------|-----|-----------|----------|---------|----------|---------------------------------------------------------------------------|-----------------|---------------------|---|--------|
| 5 | 87121409  | 87121627  | 219 | 87121567  | 4.74019  | 3.58891 | 0.73063  | ENSG00000249061:intron                                                    | ENSG00000265919 | 87114878-87114954   | - | -6563  |
| 5 | 89313729  | 89314122  | 394 | 89313960  | 15.566   | 7.77404 | 10.12097 | ENSG00000248309:intron                                                    | ENSG00000250831 | 89466536-89470039   | - | 156114 |
| 5 | 89930717  | 89931010  | 294 | 89930876  | 8.134    | 4.66145 | 3.3598   | intergenic                                                                | ENSG00000249265 | 89944909-89947573   | + | -14046 |
| 5 | 90038092  | 90038350  | 259 | 90038251  | 4.07388  | 3.28775 | 0.47041  | intergenic                                                                | ENSG00000264342 | 90016620-90016720   | - | -21500 |
| 5 | 91280532  | 91281161  | 630 | 91280692  | 10.75085 | 5.53547 | 5.69375  | ENSG00000234292:exon;ENSG00000248323:intron                               | ENSG00000234292 | 91280096-91281142   | - | 296    |
| 5 | 91311760  | 91312014  | 255 | 91311852  | 7.51885  | 4.83789 | 2.81499  | ENSG00000248323:intron                                                    | ENSG00000248323 | 91054833-91314547   | - | 2660   |
| 5 | 92581467  | 92581738  | 272 | 92581594  | 3.77589  | 3.20345 | 0.30123  | ENSG00000249776:intron                                                    | ENSG00000249169 | 92654847-92679141   | + | -73245 |
| 5 | 92607279  | 92607561  | 283 | 92607299  | 3.77589  | 3.20345 | 0.30123  | ENSG00000249776:intron                                                    | ENSG00000249169 | 92654847-92679141   | + | -47427 |
| 5 | 92908026  | 92908320  | 295 | 92908152  | 13.86989 | 6.8073  | 8.5517   | ENSG00000248528:intron                                                    | ENSG00000249958 | 92889386-92890840   | - | -17332 |
| 5 | 94850701  | 94850942  | 242 | 94850863  | 4.56295  | 3.60388 | 0.59373  | ENSG00000175471:intron                                                    | ENSG00000243806 | 94825960-94826694   | - | -24127 |
| 5 | 95707778  | 95708157  | 380 | 95708120  | 3.63193  | 3.10837 | 0.30123  | ENSG00000250240:intron                                                    | ENSG00000164292 | 95713521-95824383   | + | -5554  |
| 5 | 96657125  | 96657408  | 284 | 96657274  | 11.66864 | 5.82681 | 6.52722  | ENSG00000153113:intron                                                    | ENSG00000249180 | 96741078-96742698   | - | 85432  |
| 5 | 99027346  | 99027640  | 295 | 99027465  | 5.56876  | 3.96799 | 1.238    | intergenic                                                                | ENSG00000241597 | 98954393-98954972   | + | 73099  |
| 5 | 99048252  | 99048457  | 206 | 99048291  | 4.56295  | 3.60388 | 0.59373  | intergenic                                                                | ENSG00000241597 | 98954393-98954972   | + | 93961  |
| 5 | 99156262  | 99156673  | 412 | 99156333  | 4.56295  | 3.60388 | 0.59373  | intergenic                                                                | ENSG00000241597 | 98954393-98954972   | + | 202074 |
| 5 | 100935458 | 100935782 | 325 | 100935604 | 4.07388  | 3.28775 | 0.47041  | intergenic                                                                | ENSG00000113532 | 100806934-100903266 | - | -32353 |
| 5 | 101680417 | 101680800 | 384 | 101680611 | 4.56295  | 3.60388 | 0.59373  | intergenic                                                                | ENSG00000277506 | 101581829-101582128 | + | 98779  |
| 5 | 101925604 | 101926071 | 468 | 101925912 | 5.39424  | 4.00432 | 1.09512  | intergenic                                                                | ENSG00000249495 | 101976295-101976798 | + | -50458 |
| 5 | 102714953 | 102715176 | 224 | 102715052 | 4.56295  | 3.60388 | 0.59373  | intergenic                                                                | ENSG00000145730 | 102753980-103031105 | + | -38916 |
| 5 | 102826965 | 102827293 | 329 | 102827232 | 4.56295  | 3.60388 | 0.59373  | intergenic                                                                | ENSG00000145730 | 102753980-103031105 | + | 73148  |
| 5 | 109318389 | 109318718 | 330 | 109318682 | 4.07388  | 3.28775 | 0.47041  | ENSG00000249476:intron                                                    | ENSG00000249476 | 109237119-109326369 | - | 7816   |
| 5 | 115068885 | 115069121 | 237 | 115068974 | 10.55294 | 5.62938 | 5.52637  | intergenic                                                                | ENSG00000250242 | 115087891-115088475 | - | 19472  |
| 5 | 115478353 | 115478596 | 244 | 115478567 | 4.03577  | 3.26323 | 0.47041  | intergenic                                                                | ENSG00000249944 | 115489633-115489931 | + | -11159 |
| 5 | 120457897 | 120458184 | 288 | 120458087 | 6.26578  | 4.40475 | 1.75945  | intergenic                                                                | ENSG00000184838 | 120464277-120687332 | + | -6237  |
| 5 | 120533486 | 120533744 | 259 | 120533528 | 3.03786  | 2.80302 | 0.15111  | ENSG00000184838:intron                                                    | ENSG00000184838 | 120464277-120687332 | + | 69337  |
| 5 | 121625329 | 121625675 | 347 | 121625378 | 4.56295  | 3.60388 | 0.59373  | intergenic                                                                | ENSG00000213661 | 121616246-121616807 | + | 9255   |
| 5 | 124512571 | 124512864 | 294 | 124512644 | 4.56295  | 3.60388 | 0.59373  | ENSG00000248296:intron                                                    | ENSG00000248296 | 124492774-124536348 | - | 23631  |
| 5 | 124569273 | 124569503 | 231 | 124569341 | 5.39424  | 4.00432 | 1.09512  | intergenic                                                                | ENSG00000248296 | 124492774-124536348 | - | -33039 |
| 5 | 124583618 | 124584054 | 437 | 124583929 | 16.50093 | 7.50584 | 11.01119 | intergenic                                                                | ENSG00000248296 | 124492774-124536348 | - | -47487 |
| 5 | 124887418 | 124887628 | 211 | 124887503 | 6.26578  | 4.40475 | 1.75945  | intergenic                                                                | ENSG00000249261 | 124868971-124869914 | - | -17608 |
| 5 | 124902337 | 124902611 | 275 | 124902502 | 4.84177  | 3.65305 | 0.77787  | ENSG00000260192:intron                                                    | ENSG00000249261 | 124868971-124869914 | - | -32559 |
| 5 | 124952253 | 124952480 | 228 | 124952335 | 5.59518  | 3.83801 | 1.25935  | ENSG00000260192:intron                                                    | ENSG00000249261 | 124868971-124869914 | - | -82452 |
| 5 | 124967913 | 124968118 | 206 | 124968087 | 3.03786  | 2.80302 | 0.15111  | ENSG00000260192:intron                                                    | ENSG00000249261 | 124868971-124869914 | - | -98101 |
| 5 | 124887418 | 124887628 | 211 | 124887503 | 6.26578  | 4.40475 | 1.75945  | intergenic                                                                | ENSG00000249261 | 124868971-124869914 | - | -17608 |
| 5 | 124902337 | 124902611 | 275 | 124902502 | 4.84177  | 3.65305 | 0.77787  | ENSG00000260192:intron                                                    | ENSG00000249261 | 124868971-124869914 | - | -32559 |
| 5 | 124952253 | 124952480 | 228 | 124952335 | 5.59518  | 3.83801 | 1.25935  | ENSG00000260192:intron                                                    | ENSG00000249261 | 124868971-124869914 | - | -82452 |
| 5 | 124967913 | 124968118 | 206 | 124968087 | 3.03786  | 2.80302 | 0.15111  | ENSG00000260192:intron                                                    | ENSG00000249261 | 124868971-124869914 | - | -98101 |
| 5 | 124978578 | 124978821 | 244 | 124978786 | 3.658    | 3.12558 | 0.30123  | ENSG00000260192:intron                                                    | ENSG00000250194 | 125074664-125074980 | + | -95965 |
| 5 | 125245447 | 125245801 | 355 | 125245729 | 3.77589  | 3.20345 | 0.30123  | ENSG00000260192:intron                                                    | ENSG00000250721 | 125265527-125265651 | + | -19903 |
| 5 | 125961168 | 125961489 | 322 | 125961364 | 11.18335 | 6.21019 | 6.08588  | intergenic                                                                | ENSG00000241888 | 125966776-125968085 | - | 6757   |
| 5 | 127677574 | 127677938 | 365 | 127677875 | 3.49438  | 2.91742 | 0.30123  | intergenic                                                                | ENSG00000248799 | 127651692-127664029 | - | -13726 |
| 5 | 130324090 | 130324384 | 295 | 130324229 | 6.51641  | 4.07877 | 1.96373  | intergenic                                                                | ENSG00000252514 | 130386620-130386680 | - | 62443  |
| 5 | 131854312 | 131854551 | 240 | 131854351 | 3.53038  | 3.04135 | 0.30123  | ENSG00000239642:intron;ENSG00000281938:intron                             | ENSG00000279584 | 131797414-131797929 | + | 57017  |
| 5 | 132020219 | 132020518 | 300 | 132020356 | 13.56604 | 6.40949 | 8.26891  | intergenic                                                                | ENSG00000164398 | 131949972-132012243 | - | -8125  |
| 5 | 135446752 | 135447012 | 261 | 135446977 | 5.6497   | 4.01836 | 1.29426  | ENSG00000255833:three_prime_UTR;ENSG00000251380:exon;ENSG00000255833:exon | ENSG00000251380 | 135444213-135447348 | - | 466    |
| 5 | 137009378 | 137009688 | 311 | 137009559 | 6.26578  | 4.40475 | 1.75945  | ENSG00000152377:intron                                                    | ENSG00000222285 | 136969199-136969306 | - | -40226 |

|   |           |           |     |           |          |         |          |                                               |                 |                     |   |         |
|---|-----------|-----------|-----|-----------|----------|---------|----------|-----------------------------------------------|-----------------|---------------------|---|---------|
| 5 | 137112912 | 137113254 | 343 | 137113221 | 3.34993  | 2.92244 | 0.30123  | ENSG00000152377:intron                        | ENSG00000222285 | 136969199-136969306 | - | -143776 |
| 5 | 137305078 | 137305443 | 366 | 137305215 | 4.56295  | 3.60388 | 0.59373  | ENSG00000152377:intron                        | ENSG00000152377 | 136975297-137598379 | - | 293119  |
| 5 | 138340708 | 138340990 | 283 | 138340875 | 4.90328  | 3.55851 | 0.82412  | ENSG00000120709:intron                        | ENSG00000158402 | 138285264-138338355 | - | -2493   |
| 5 | 140461766 | 140462181 | 416 | 140461938 | 3.77589  | 3.20345 | 0.30123  | ENSG00000131503:intron;ENSG00000254996:intron | ENSG00000254996 | 140401907-140549569 | + | 60066   |
| 5 | 140711046 | 140711408 | 363 | 140711163 | 14.24642 | 6.77521 | 8.90296  | ENSG00000199990:Promoter                      | ENSG00000199990 | 140711274-140711373 | + | -47     |
| 5 | 141259217 | 141259466 | 250 | 141259224 | 3.77589  | 3.20345 | 0.30123  | ENSG00000277795:Promoter                      | ENSG00000277795 | 141259234-141261364 | + | 107     |
| 5 | 141864902 | 141865251 | 350 | 141865100 | 9.79137  | 5.02659 | 4.83571  | ENSG00000156453:exon                          | ENSG00000156453 | 141853110-141879246 | - | 14170   |
| 5 | 141942503 | 141942779 | 277 | 141942593 | 3.6499   | 2.91341 | 0.30123  | intergenic                                    | ENSG00000271871 | 141952418-141953375 | + | -9777   |
| 5 | 142191476 | 142191693 | 218 | 142191520 | 4.96535  | 3.7313  | 0.86205  | intergenic                                    | ENSG00000280047 | 142165766-142168387 | + | 25818   |
| 5 | 142223700 | 142223959 | 260 | 142223830 | 10.64217 | 4.64231 | 5.60051  | intergenic                                    | ENSG00000280047 | 142165766-142168387 | + | 58063   |
| 5 | 142191476 | 142191693 | 218 | 142191520 | 4.96535  | 3.7313  | 0.86205  | intergenic                                    | ENSG00000280047 | 142165766-142168387 | + | 25818   |
| 5 | 142223700 | 142223959 | 260 | 142223830 | 10.64217 | 4.64231 | 5.60051  | intergenic                                    | ENSG00000280047 | 142165766-142168387 | + | 58063   |
| 5 | 142191476 | 142191693 | 218 | 142191520 | 4.96535  | 3.7313  | 0.86205  | intergenic                                    | ENSG00000280047 | 142165766-142168387 | + | 25818   |
| 5 | 142223700 | 142223959 | 260 | 142223830 | 10.64217 | 4.64231 | 5.60051  | intergenic                                    | ENSG00000280047 | 142165766-142168387 | + | 58063   |
| 5 | 143009083 | 143009390 | 308 | 143009251 | 13.86989 | 6.8073  | 8.5517   | ENSG00000145819:intron                        | ENSG00000285366 | 142946568-142947105 | - | -62131  |
| 5 | 143052550 | 143052767 | 218 | 143052671 | 4.33895  | 3.45881 | 0.59373  | ENSG00000145819:intron                        | ENSG00000285366 | 142946568-142947105 | - | -105553 |
| 5 | 143009083 | 143009390 | 308 | 143009251 | 13.86989 | 6.8073  | 8.5517   | ENSG00000145819:intron                        | ENSG00000285366 | 142946568-142947105 | - | -62131  |
| 5 | 143052550 | 143052767 | 218 | 143052671 | 4.33895  | 3.45881 | 0.59373  | ENSG00000145819:intron                        | ENSG00000285366 | 142946568-142947105 | - | -105553 |
| 5 | 143262431 | 143262713 | 283 | 143262546 | 8.17554  | 4.86236 | 3.38452  | intergenic                                    | ENSG00000231579 | 143332604-143333239 | + | -70032  |
| 5 | 143627271 | 143627513 | 243 | 143627318 | 4.56295  | 3.60388 | 0.59373  | ENSG00000249881:intron                        | ENSG00000249881 | 143605627-143828772 | + | 21764   |
| 5 | 143733146 | 143733374 | 229 | 143733316 | 3.58061  | 3.07449 | 0.30123  | ENSG00000249881:intron                        | ENSG00000225869 | 143752089-143752704 | - | 19444   |
| 5 | 144867861 | 144868163 | 303 | 144868013 | 4.42776  | 3.51628 | 0.59373  | intergenic                                    | ENSG00000249229 | 145001852-145005789 | - | 137777  |
| 5 | 145056934 | 145057180 | 247 | 145056985 | 7.17425  | 4.80518 | 2.52654  | intergenic                                    | ENSG00000249229 | 145001852-145005789 | - | -51267  |
| 5 | 145086287 | 145086515 | 229 | 145086413 | 4.07388  | 3.28775 | 0.47041  | intergenic                                    | ENSG00000249229 | 145001852-145005789 | - | -80611  |
| 5 | 144867861 | 144868163 | 303 | 144868013 | 4.42776  | 3.51628 | 0.59373  | intergenic                                    | ENSG00000249229 | 145001852-145005789 | - | 137777  |
| 5 | 145056934 | 145057180 | 247 | 145056985 | 7.17425  | 4.80518 | 2.52654  | intergenic                                    | ENSG00000249229 | 145001852-145005789 | - | -51267  |
| 5 | 145086287 | 145086515 | 229 | 145086413 | 4.07388  | 3.28775 | 0.47041  | intergenic                                    | ENSG00000249229 | 145001852-145005789 | - | -80611  |
| 5 | 146721577 | 146722064 | 488 | 146721662 | 5.39424  | 4.00432 | 1.09512  | ENSG00000156475:intron                        | ENSG00000248568 | 146706380-146707600 | - | -14220  |
| 5 | 147508089 | 147508303 | 215 | 147508160 | 5.56876  | 3.96799 | 1.238    | ENSG00000113657:intron                        | ENSG00000113657 | 147390810-147510056 | - | 1860    |
| 5 | 147509198 | 147509579 | 382 | 147509225 | 3.88371  | 3.16559 | 0.37576  | ENSG00000113657:intron                        | ENSG00000113657 | 147390810-147510056 | - | 668     |
| 5 | 147932609 | 147932862 | 254 | 147932729 | 4.1849   | 3.24157 | 0.52478  | intergenic                                    | ENSG00000250346 | 147922178-147923421 | + | 10557   |
| 5 | 148091047 | 148091321 | 275 | 148091122 | 5.73591  | 4.07212 | 1.35894  | ENSG00000133710:intron                        | ENSG00000133710 | 148025682-148137289 | + | 65501   |
| 5 | 148228567 | 148228800 | 234 | 148228583 | 4.07388  | 3.28775 | 0.47041  | ENSG00000248109:intron                        | ENSG00000248109 | 148221649-148243580 | + | 7034    |
| 5 | 148834753 | 148835163 | 411 | 148834891 | 5.3937   | 3.85943 | 1.09512  | intergenic                                    | ENSG00000169252 | 148825244-148828687 | + | 9713    |
| 5 | 149254918 | 149255189 | 272 | 149255106 | 3.6499   | 2.91341 | 0.30123  | ENSG00000173210:intron;ENSG00000253406:intron | ENSG00000157510 | 149271870-149341802 | + | -16817  |
| 5 | 150349541 | 150349772 | 232 | 150349660 | 3.92092  | 3.18945 | 0.4041   | intergenic                                    | ENSG00000070814 | 150357628-150400308 | + | -7972   |
| 5 | 152382555 | 152382778 | 224 | 152382742 | 4.56295  | 3.60388 | 0.59373  | intergenic                                    | ENSG00000132911 | 152391531-152433368 | - | 50702   |
| 5 | 152453237 | 152453605 | 369 | 152453539 | 3.34993  | 2.92244 | 0.30123  | intergenic                                    | ENSG00000132911 | 152391531-152433368 | - | -20052  |
| 5 | 153118148 | 153118729 | 582 | 153118553 | 6.26578  | 4.40475 | 1.75945  | ENSG00000249484:intron                        | ENSG00000249484 | 152618964-153223543 | - | 105105  |
| 5 | 153253870 | 153254078 | 209 | 153253973 | 3.03786  | 2.80302 | 0.15111  | intergenic                                    | ENSG00000249484 | 152618964-153223543 | - | -30430  |
| 5 | 153352684 | 153352894 | 211 | 153352769 | 5.87556  | 4.15944 | 1.46959  | intergenic                                    | ENSG00000249484 | 152618964-153223543 | - | -129245 |
| 5 | 155933637 | 155933898 | 262 | 155933800 | 3.77589  | 3.20345 | 0.30123  | ENSG00000170624:intron                        | ENSG00000170624 | 155870343-156767788 | + | 63424   |
| 5 | 156092065 | 156092340 | 276 | 156092218 | 3.77589  | 3.20345 | 0.30123  | ENSG00000170624:intron                        | ENSG00000170624 | 155870343-156767788 | + | 221859  |
| 5 | 159021343 | 159021602 | 260 | 159021455 | 5.31032  | 3.95075 | 1.09512  | ENSG00000164330:intron                        | ENSG00000253456 | 158985805-158987199 | + | 35667   |
| 5 | 159773308 | 159773646 | 339 | 159773477 | 29.47108 | 9.71099 | 23.55325 | ENSG00000253311:intron;ENSG00000249738:intron | ENSG00000170214 | 159865079-159972544 | + | -91602  |
| 5 | 159826438 | 159826738 | 301 | 159826608 | 14.83338 | 6.62465 | 9.44274  | ENSG00000253311:intron                        | ENSG00000170214 | 159865079-159972544 | + | -38491  |



|   |           |           |     |           |          |          |          |                                                   |                 |                     |   |         |
|---|-----------|-----------|-----|-----------|----------|----------|----------|---------------------------------------------------|-----------------|---------------------|---|---------|
| 5 | 159773308 | 159773646 | 339 | 159773477 | 29.47108 | 9.71099  | 23.55325 | ENSG00000253311:intron;E<br>NSG00000249738:intron | ENSG00000170214 | 159865079-159972544 | + | -91602  |
| 5 | 159826438 | 159826738 | 301 | 159826608 | 14.83338 | 6.62465  | 9.44274  | ENSG00000253311:intron                            | ENSG00000170214 | 159865079-159972544 | + | -38491  |
| 5 | 162320276 | 162320521 | 246 | 162320446 | 5.39424  | 4.00432  | 1.09512  | intergenic                                        | ENSG00000201474 | 162477890-162477993 | + | -157492 |
| 5 | 163679134 | 163679365 | 232 | 163679244 | 4.56295  | 3.60388  | 0.59373  | intergenic                                        | ENSG00000224012 | 163709209-163709514 | - | 30265   |
| 5 | 166904710 | 166904934 | 225 | 166904829 | 4.56295  | 3.60388  | 0.59373  | intergenic                                        | ENSG00000254130 | 166905221-166926370 | - | 21548   |
| 5 | 166943885 | 166944131 | 247 | 166943966 | 3.77589  | 3.20345  | 0.30123  | intergenic                                        | ENSG00000254130 | 166905221-166926370 | - | -17637  |
| 5 | 166987701 | 166988014 | 314 | 166987832 | 3.77589  | 3.20345  | 0.30123  | intergenic                                        | ENSG00000254130 | 166905221-166926370 | - | -61487  |
| 5 | 168116054 | 168116293 | 240 | 168116106 | 4.07388  | 3.28775  | 0.47041  | ENSG00000253925:intron;E<br>NSG00000145934:intron | ENSG00000279739 | 168128855-168130422 | + | -12682  |
| 5 | 169063035 | 169063266 | 232 | 169063118 | 4.84177  | 3.65305  | 0.77787  | ENSG00000184347:intron                            | ENSG00000248222 | 169013226-169037998 | + | 49924   |
| 5 | 171231421 | 171231690 | 270 | 171231558 | 5.39424  | 4.00432  | 1.09512  | ENSG00000204764:intron                            | ENSG00000253213 | 171251865-171252982 | + | -20310  |
| 5 | 174473581 | 174473922 | 342 | 174473771 | 6.26578  | 4.40475  | 1.75945  | ENSG00000249306:intron                            | ENSG00000213376 | 174513304-174514307 | + | -39553  |
| 5 | 177454619 | 177454847 | 229 | 177454709 | 7.44723  | 3.75648  | 2.74965  | ENSG00000131188:intron                            | ENSG00000246334 | 177438502-177447699 | - | -7033   |
| 5 | 179158546 | 179158858 | 313 | 179158591 | 3.93344  | 3.19748  | 0.41301  | ENSG00000087116:intron                            | ENSG00000253144 | 179082679-179083194 | - | -75507  |
| 5 | 179392125 | 179392469 | 345 | 179392269 | 3.77589  | 3.20345  | 0.30123  | intergenic                                        | ENSG00000253617 | 179385818-179385992 | - | -6304   |
| 6 | 154265    | 154674    | 410 | 154486    | 5.74381  | 3.92704  | 1.36222  | intergenic                                        | ENSG00000217929 | 131909-145083       | - | -9386   |
| 6 | 1797102   | 1797450   | 349 | 1797411   | 4.06198  | 3.28009  | 0.47041  | ENSG00000112699:intron                            | ENSG00000054598 | 1609971-1613897     | + | 187304  |
| 6 | 1831027   | 1831299   | 273 | 1831084   | 3.49438  | 2.91742  | 0.30123  | ENSG00000112699:intron                            | ENSG00000054598 | 1609971-1613897     | + | 221191  |
| 6 | 4166159   | 4166414   | 256 | 4166171   | 4.06198  | 3.28009  | 0.47041  | intergenic                                        | ENSG00000237716 | 4186623-4188109     | - | 21823   |
| 6 | 4682593   | 4682823   | 231 | 4682721   | 4.1849   | 3.24157  | 0.52478  | intergenic                                        | ENSG00000217385 | 4702462-4703779     | + | -19754  |
| 6 | 5425510   | 5425885   | 376 | 5425560   | 4.48857  | 3.55567  | 0.59373  | ENSG00000145982:intron                            | ENSG00000269985 | 5451682-5458075     | - | 32378   |
| 6 | 5588649   | 5588887   | 239 | 5588876   | 3.76336  | 3.08858  | 0.30123  | ENSG00000145982:intron                            | ENSG00000218574 | 5609226-5610195     | - | 21427   |
| 6 | 6124960   | 6125220   | 261 | 6125064   | 4.55072  | 3.59595  | 0.59373  | intergenic                                        | ENSG00000283616 | 6169333-6169409     | + | -44243  |
| 6 | 6138486   | 6138915   | 430 | 6138606   | 6.26578  | 4.40475  | 1.75945  | intergenic                                        | ENSG00000283616 | 6169333-6169409     | + | -30633  |
| 6 | 6681181   | 6681523   | 343 | 6681345   | 4.81345  | 3.63515  | 0.77787  | ENSG00000261211:exon                              | ENSG00000261211 | 6680308-6683633     | - | 2281    |
| 6 | 6733713   | 6733990   | 278 | 6733935   | 4.62651  | 3.51732  | 0.63659  | ENSG00000226281:intron                            | ENSG00000226281 | 6692743-6739030     | - | 5179    |
| 6 | 7360493   | 7360774   | 282 | 7360604   | 4.07388  | 3.28775  | 0.47041  | ENSG00000164304:intron                            | ENSG00000124783 | 7268305-7347446     | - | -13187  |
| 6 | 7963217   | 7963639   | 423 | 7963461   | 46.3087  | 16.17968 | 39.98943 | ENSG00000259040:intron                            | ENSG00000219294 | 7986536-7988192     | + | -23108  |
| 6 | 12017954  | 12018202  | 249 | 12018067  | 3.37418  | 2.93841  | 0.30123  | ENSG00000095951:intron                            | ENSG00000095951 | 12008761-12164999   | + | 9316    |
| 6 | 12051796  | 12052090  | 295 | 12051944  | 6.8972   | 4.14041  | 2.29209  | ENSG00000095951:intron                            | ENSG00000095951 | 12008761-12164999   | + | 43181   |
| 6 | 15138347  | 15138672  | 326 | 15138524  | 4.56295  | 3.60388  | 0.59373  | intergenic                                        | ENSG00000242989 | 15112967-15113221   | + | 25542   |
| 6 | 16731701  | 16731961  | 261 | 16731821  | 8.45558  | 5.02538  | 3.63629  | ENSG00000124788:intron                            | ENSG00000229931 | 16761137-16762652   | + | -29306  |
| 6 | 17394110  | 17394372  | 263 | 17394257  | 4.91809  | 3.10693  | 0.82412  | ENSG00000112186:intron                            | ENSG00000112186 | 17393215-17557792   | + | 1025    |
| 6 | 19474717  | 19474976  | 260 | 19474827  | 3.77589  | 3.20345  | 0.30123  | ENSG00000228412:intron                            | ENSG00000201523 | 19438282-19438418   | + | 36564   |
| 6 | 19494700  | 19495385  | 686 | 19495154  | 5.39424  | 4.00432  | 1.09512  | ENSG00000228412:intron                            | ENSG00000201523 | 19438282-19438418   | + | 56760   |
| 6 | 20162422  | 20162637  | 216 | 20162594  | 5.56876  | 3.96799  | 1.238    | ENSG00000172197:intron                            | ENSG00000227803 | 20212086-20317739   | + | -49557  |
| 6 | 20638364  | 20638614  | 251 | 20638441  | 5.24168  | 3.90698  | 1.06394  | ENSG00000145996:intron                            | ENSG00000225832 | 20722327-20723655   | - | 85166   |
| 6 | 21217525  | 21217796  | 272 | 21217741  | 4.84177  | 3.65305  | 0.77787  | ENSG00000145996:intron                            | ENSG00000227089 | 21354410-21355296   | - | 137636  |
| 6 | 24244697  | 24244918  | 222 | 24244836  | 4.62651  | 3.51732  | 0.63659  | ENSG00000146038:intron                            | ENSG00000251830 | 24166272-24166374   | + | 78535   |
| 6 | 24976733  | 24976951  | 219 | 24976837  | 5.6497   | 4.01836  | 1.29426  | ENSG00000214975:exon;ENS<br>G00000111913:intron   | ENSG00000214975 | 24976418-24976982   | + | 423     |
| 6 | 25250887  | 25251136  | 250 | 25251034  | 8.17554  | 4.86236  | 3.38452  | ENSG00000168405:intron                            | ENSG00000271108 | 25248262-25248779   | + | 2749    |
| 6 | 25315561  | 25315856  | 296 | 25315756  | 3.76336  | 3.08858  | 0.30123  | ENSG00000079691:intron;E<br>NSG00000168405:intron | ENSG00000207286 | 25287431-25287533   | - | -28175  |
| 6 | 25587179  | 25587394  | 216 | 25587264  | 3.17405  | 2.80686  | 0.2494   | ENSG00000079691:intron                            | ENSG00000079689 | 25652200-25701783   | + | -64914  |
| 6 | 26553734  | 26554094  | 361 | 26553952  | 6.33349  | 4.28489  | 1.823    | intergenic                                        | ENSG00000284607 | 26569323-26574698   | + | -15409  |
| 6 | 28084642  | 28084869  | 228 | 28084851  | 3.69765  | 3.15177  | 0.30123  | ENSG00000197279:intron                            | ENSG00000272009 | 28078791-28081130   | - | -3625   |
| 6 | 28151551  | 28151875  | 325 | 28151644  | 3.77589  | 3.20345  | 0.30123  | ENSG00000198315:intron                            | ENSG00000198315 | 28141909-28159472   | + | 9803    |
| 6 | 29507254  | 29507500  | 247 | 29507499  | 3.02441  | 2.62206  | 0.15111  | ENSG00000229274:exon                              | ENSG00000229274 | 29497508-29510556   | + | 9868    |

|   |          |          |     |          |          |         |         |                                                     |                 |                   |   |         |
|---|----------|----------|-----|----------|----------|---------|---------|-----------------------------------------------------|-----------------|-------------------|---|---------|
| 6 | 30259788 | 30260086 | 299 | 30259956 | 4.70801  | 3.44018 | 0.70461 | ENSG00000270604:intron;E<br>NSG00000243753:exon     | ENSG00000243753 | 30259583-30293014 | + | 353     |
| 6 | 31034687 | 31035026 | 340 | 31034800 | 4.56295  | 3.60388 | 0.59373 | ENSG00000261272:exon                                | ENSG00000228789 | 31053449-31059890 | + | -18593  |
| 6 | 31198002 | 31198323 | 322 | 31198103 | 3.6499   | 2.91341 | 0.30123 | ENSG00000206344:intron;E<br>NSG00000272501:Promoter | ENSG00000272501 | 31195199-31198037 | - | -125    |
| 6 | 31734639 | 31734920 | 282 | 31734817 | 8.04467  | 4.29601 | 3.29781 | ENSG00000213719:intron<br>ENSG00000204396:exon;ENS  | ENSG00000213722 | 31727037-31730617 | - | -4162   |
| 6 | 31777034 | 31777374 | 341 | 31777169 | 5.96733  | 3.52084 | 1.54405 | G00000204396:five_prime_<br>IITR                    | ENSG00000204396 | 31765589-31777294 | - | 90      |
| 6 | 32299655 | 32299934 | 280 | 32299693 | 4.56295  | 3.60388 | 0.59373 | ENSG00000204296:intron;E<br>NSG00000225914:intron   | ENSG00000237285 | 32325218-32326178 | + | -25424  |
| 6 | 32832360 | 32832628 | 269 | 32832420 | 5.15789  | 3.85362 | 1.00126 | ENSG00000204267:exon;ENS<br>G00000250264:exon       | ENSG00000204267 | 32821832-32838780 | - | 6286    |
| 6 | 34224089 | 34224334 | 246 | 34224192 | 4.84975  | 2.89864 | 0.78358 | intergenic                                          | ENSG00000214810 | 34219438-34220066 | + | 4773    |
| 6 | 34485015 | 34485298 | 284 | 34485153 | 8.95304  | 4.76203 | 4.09227 | ENSG00000124507:intron                              | ENSG00000124507 | 34466060-34535231 | + | 19096   |
| 6 | 34811226 | 34811538 | 313 | 34811447 | 6.86122  | 4.43968 | 2.2645  | ENSG00000065060:intron                              | ENSG00000206717 | 34821444-34821542 | + | -10062  |
| 6 | 35777321 | 35777544 | 224 | 35777460 | 5.66809  | 4.02982 | 1.31021 | ENSG00000196748:exon                                | ENSG00000196748 | 35776593-35779552 | + | 839     |
| 6 | 35982150 | 35982387 | 238 | 35982347 | 4.35972  | 3.35026 | 0.59373 | ENSG00000112053:intron                              | ENSG00000271304 | 35989514-35991374 | - | 9106    |
| 6 | 36336582 | 36336802 | 221 | 36336683 | 5.56876  | 3.96799 | 1.238   | ENSG00000189325:intron                              | ENSG00000189325 | 36315756-36336885 | - | 193     |
| 6 | 36975311 | 36975574 | 264 | 36975383 | 6.06008  | 4.11811 | 1.6243  | ENSG00000137409:intron                              | ENSG00000137409 | 36968140-36986298 | - | 10856   |
| 6 | 37024670 | 37024952 | 283 | 37024811 | 11.66864 | 5.82681 | 6.52722 | ENSG00000146192:intron                              | ENSG00000146192 | 37005645-37029070 | + | 19165   |
| 6 | 37048748 | 37048990 | 243 | 37048847 | 11.73403 | 6.07685 | 6.5894  | intergenic                                          | ENSG00000226976 | 37044859-37045189 | + | 4009    |
| 6 | 37471720 | 37471946 | 227 | 37471773 | 3.51799  | 3.03318 | 0.30123 | ENSG00000137200:intron                              | ENSG00000198937 | 37482919-37499922 | - | 28089   |
| 6 | 39530194 | 39530432 | 239 | 39530319 | 8.06337  | 4.79751 | 3.31375 | ENSG00000164627:intron                              | ENSG00000231276 | 39553810-39554943 | + | -23497  |
| 6 | 40258357 | 40258589 | 233 | 40258529 | 5.75307  | 4.08283 | 1.36357 | intergenic                                          | ENSG00000227131 | 40271565-40276237 | - | 17764   |
| 6 | 41938966 | 41939192 | 227 | 41939087 | 4.17432  | 3.23501 | 0.52478 | ENSG00000112576:intron                              | ENSG00000112578 | 41921187-41933046 | + | 17891   |
| 6 | 42514673 | 42514933 | 261 | 42514825 | 7.17425  | 4.80518 | 2.52654 | intergenic                                          | ENSG00000237107 | 42499709-42500022 | + | 15093   |
| 6 | 42630939 | 42631241 | 303 | 42630992 | 4.04884  | 3.27164 | 0.47041 | ENSG00000024048:intron                              | ENSG00000206848 | 42664161-42664268 | + | -33071  |
| 6 | 43767882 | 43768097 | 216 | 43767939 | 1.80642  | 1.97206 | 0.08775 | intergenic                                          | ENSG00000112715 | 43770183-43786487 | + | -2194   |
| 6 | 43798958 | 43799445 | 488 | 43799096 | 6.51641  | 4.07877 | 1.96373 | intergenic                                          | ENSG00000283573 | 43803192-43842625 | + | -3991   |
| 6 | 45709937 | 45710156 | 220 | 45710008 | 7.11644  | 3.84111 | 2.49147 | intergenic                                          | ENSG00000261080 | 45573345-45576770 | - | -133276 |
| 6 | 45830326 | 45830846 | 521 | 45830717 | 5.75051  | 3.78743 | 1.36222 | intergenic                                          | ENSG00000212468 | 46018744-46018851 | + | -188158 |
| 6 | 46853947 | 46854217 | 271 | 46854113 | 4.56295  | 3.60388 | 0.59373 | ENSG00000069122:intron                              | ENSG00000225730 | 46903470-46909078 | + | -49388  |
| 6 | 47499166 | 47499400 | 235 | 47499286 | 6.26578  | 4.40475 | 1.75945 | ENSG00000198087:intron                              | ENSG00000199762 | 47489066-47489170 | + | 10216   |
| 6 | 51660848 | 51661130 | 283 | 51660966 | 5.6497   | 4.01836 | 1.29426 | ENSG00000170927:intron                              | ENSG00000228689 | 51599722-51623428 | + | 61266   |
| 6 | 51780997 | 51781218 | 222 | 51781099 | 3.77589  | 3.20345 | 0.30123 | ENSG00000170927:intron                              | ENSG00000228689 | 51599722-51623428 | + | 181385  |
| 6 | 52227633 | 52227877 | 245 | 52227739 | 8.85591  | 4.88357 | 4.00947 | intergenic                                          | ENSG00000112116 | 52236680-52244537 | - | 16782   |
| 6 | 52390076 | 52390732 | 657 | 52390599 | 7.84387  | 5.03722 | 3.11593 | ENSG00000170915:intron;E<br>NSG00000096093:intron   | ENSG00000096093 | 52362122-52529886 | + | 28281   |
| 6 | 52897987 | 52898265 | 279 | 52898127 | 6.15301  | 4.33368 | 1.70124 | ENSG00000174156:intron                              | ENSG00000174156 | 52896638-52909685 | - | 11559   |
| 6 | 61494632 | 61494915 | 284 | 61494640 | 4.07388  | 3.28775 | 0.47041 | intergenic                                          | ENSG00000255633 | 61574327-61574402 | + | -79554  |
| 6 | 61538970 | 61539188 | 219 | 61539057 | 4.70801  | 3.44018 | 0.70461 | intergenic                                          | ENSG00000255633 | 61574327-61574402 | + | -35248  |
| 6 | 64154155 | 64154433 | 279 | 64154242 | 4.56295  | 3.60388 | 0.59373 | ENSG00000188107:intron                              | ENSG00000232120 | 64377794-64412779 | + | -223500 |
| 6 | 69467207 | 69467414 | 208 | 69467300 | 3.03786  | 2.80302 | 0.15111 | intergenic                                          | ENSG00000219085 | 69705286-69706160 | - | 238850  |
| 6 | 69490731 | 69491062 | 332 | 69490992 | 4.56295  | 3.60388 | 0.59373 | intergenic                                          | ENSG00000219085 | 69705286-69706160 | - | 215264  |
| 6 | 69763862 | 69764115 | 254 | 69763993 | 4.56295  | 3.60388 | 0.59373 | ENSG00000168216:intron                              | ENSG00000219881 | 69745870-69746851 | + | 18118   |
| 6 | 71788617 | 71788871 | 255 | 71788683 | 4.07388  | 3.28775 | 0.47041 | intergenic                                          | ENSG00000079841 | 71886702-72403143 | + | -97958  |
| 6 | 80503793 | 80504040 | 248 | 80503913 | 4.56295  | 3.60388 | 0.59373 | intergenic                                          | ENSG00000181705 | 80499195-80499392 | - | -4524   |
| 6 | 81927771 | 81928030 | 260 | 81927939 | 4.84177  | 3.65305 | 0.77787 | ENSG00000226453:intron                              | ENSG00000226453 | 81845184-81933480 | - | 5580    |
| 6 | 82410327 | 82410549 | 223 | 82410480 | 5.22474  | 3.89619 | 1.05478 | intergenic                                          | ENSG00000146242 | 82363205-82370828 | + | 47232   |
| 6 | 82450987 | 82451203 | 217 | 82451111 | 3.77589  | 3.20345 | 0.30123 | intergenic                                          | ENSG00000146242 | 82363205-82370828 | + | 87889   |

|   |           |           |     |           |          |         |          |                                                      |                 |                     |   |         |
|---|-----------|-----------|-----|-----------|----------|---------|----------|------------------------------------------------------|-----------------|---------------------|---|---------|
| 6 | 83507872  | 83508087  | 216 | 83507955  | 3.18471  | 2.81386 | 0.2494   | intergenic                                           | ENSG00000146250 | 83512537-83525704   | + | -4558   |
| 6 | 83532368  | 83532584  | 217 | 83532497  | 3.03786  | 2.80302 | 0.15111  | intergenic                                           | ENSG00000146250 | 83512537-83525704   | + | 19938   |
| 6 | 84090279  | 84090518  | 240 | 84090483  | 3.77589  | 3.20345 | 0.30123  | ENSG00000135324:three_pr<br>ime_UTR;ENSG00000135324: | ENSG00000135324 | 84033755-84090881   | + | 56643   |
| 6 | 84561083  | 84561293  | 211 | 84561257  | 4.56295  | 3.60388 | 0.59373  | exon<br>intergenic                                   | ENSG00000231776 | 84421027-84556152   | - | -5035   |
| 6 | 84575341  | 84575688  | 348 | 84575535  | 7.34679  | 4.23292 | 2.66603  | intergenic                                           | ENSG00000231776 | 84421027-84556152   | - | -19362  |
| 6 | 85490202  | 85490468  | 267 | 85490336  | 5.24168  | 3.90698 | 1.06394  | ENSG00000135318:intron                               | ENSG00000280232 | 85498440-85499058   | - | 8723    |
| 6 | 85524425  | 85524780  | 356 | 85524752  | 3.98411  | 3.23002 | 0.45207  | ENSG00000135317:intron                               | ENSG00000280232 | 85498440-85499058   | - | -25544  |
| 6 | 87032730  | 87033045  | 316 | 87032897  | 3.77589  | 3.20345 | 0.30123  | intergenic                                           | ENSG00000217169 | 87000044-87000291   | - | -32596  |
| 6 | 88348158  | 88348650  | 493 | 88348461  | 5.38044  | 3.99551 | 1.09512  | ENSG00000234426:intron                               | ENSG00000220267 | 88275881-88276989   | - | -71414  |
| 6 | 88650295  | 88650560  | 266 | 88650399  | 12.20111 | 6.5755  | 7.01985  | ENSG00000111880:intron                               | ENSG00000222145 | 88714241-88714430   | - | 64003   |
| 6 | 89298070  | 89298304  | 235 | 89298165  | 8.95304  | 4.76203 | 4.09227  | ENSG00000111886:intron                               | ENSG00000220418 | 89301782-89303114   | + | -3595   |
| 6 | 89691105  | 89691325  | 221 | 89691146  | 3.23478  | 2.75364 | 0.28314  | ENSG00000112159:intron                               | ENSG00000228124 | 89673468-89675783   | + | 17746   |
| 6 | 90369012  | 90369351  | 340 | 90369196  | 20.26942 | 7.93672 | 14.62399 | intergenic                                           | ENSG00000260271 | 90320442-90362632   | + | 48739   |
| 6 | 90479099  | 90479518  | 420 | 90479371  | 4.76929  | 3.60726 | 0.74587  | intergenic                                           | ENSG00000135341 | 90513572-90587045   | - | 107737  |
| 6 | 90892272  | 90892525  | 254 | 90892313  | 3.77589  | 3.20345 | 0.30123  | intergenic                                           | ENSG00000135341 | 90513572-90587045   | - | -305353 |
| 6 | 92709951  | 92710370  | 420 | 92710226  | 13.26553 | 7.20777 | 7.98923  | intergenic                                           | ENSG00000220908 | 92723002-92723829   | - | 13669   |
| 6 | 98561244  | 98561486  | 243 | 98561331  | 3.77589  | 3.20345 | 0.30123  | intergenic                                           | ENSG00000187472 | 98780256-98780505   | - | 219140  |
| 6 | 98777834  | 98778081  | 248 | 98777960  | 11.46477 | 6.37695 | 6.34551  | intergenic                                           | ENSG00000187472 | 98780256-98780505   | - | 2548    |
| 6 | 99263691  | 99263909  | 219 | 99263857  | 4.49014  | 3.43176 | 0.59373  | intergenic                                           | ENSG00000146267 | 99271168-99350062   | - | 86262   |
| 6 | 99606476  | 99607016  | 541 | 99606660  | 4.10177  | 3.30571 | 0.49129  | ENSG00000112238:Promoter                             | ENSG00000112238 | 99606729-99615578   | + | 16      |
| 6 | 105646401 | 105646814 | 414 | 105646632 | 4.29558  | 3.43077 | 0.59373  | intergenic                                           | ENSG00000237567 | 105612666-105632196 | - | -14411  |
| 6 | 105757530 | 105758087 | 558 | 105757656 | 15.53994 | 6.99217 | 10.09573 | ENSG00000284999:intron                               | ENSG00000219088 | 105666325-105667998 | + | 91483   |
| 6 | 105787267 | 105787503 | 237 | 105787351 | 6.6688   | 3.87655 | 2.09177  | ENSG00000284999:intron                               | ENSG00000284999 | 105679377-105893041 | - | 105656  |
| 6 | 106106412 | 106106628 | 217 | 106106549 | 6.31582  | 4.27407 | 1.80607  | ENSG00000057657:intron;E<br>NSG00000057663:intron    | ENSG00000269919 | 106100139-106100593 | + | 6380    |
| 6 | 106145738 | 106145988 | 251 | 106145892 | 6.20936  | 3.52525 | 1.75105  | ENSG00000057663:intron                               | ENSG00000269919 | 106100139-106100593 | + | 45723   |
| 6 | 106106412 | 106106628 | 217 | 106106549 | 6.31582  | 4.27407 | 1.80607  | ENSG00000057657:intron;E<br>NSG00000057663:intron    | ENSG00000269919 | 106100139-106100593 | + | 6380    |
| 6 | 106145738 | 106145988 | 251 | 106145892 | 6.20936  | 3.52525 | 1.75105  | ENSG00000057663:intron                               | ENSG00000269919 | 106100139-106100593 | + | 45723   |
| 6 | 107052134 | 107052394 | 261 | 107052298 | 5.24168  | 3.90698 | 1.06394  | intergenic                                           | ENSG00000130349 | 107028212-107051342 | + | 24051   |
| 6 | 107658009 | 107658282 | 274 | 107658141 | 8.17554  | 4.86236 | 3.38452  | ENSG00000112320:intron                               | ENSG00000280135 | 107697298-107700218 | - | 42073   |
| 6 | 108169610 | 108169947 | 338 | 108169781 | 3.20396  | 2.64557 | 0.26167  | ENSG00000112333:intron                               | ENSG00000112333 | 108166057-108188809 | + | 3721    |
| 6 | 108564265 | 108564583 | 319 | 108564412 | 16.73013 | 7.13482 | 11.23059 | ENSG00000118689:intron                               | ENSG00000118689 | 108559834-108684774 | + | 4589    |
| 6 | 108755190 | 108755699 | 510 | 108755643 | 5.45233  | 3.75292 | 1.13858  | ENSG00000203801:intron                               | ENSG00000203801 | 108751653-108769942 | + | 3791    |
| 6 | 109015381 | 109015604 | 224 | 109015523 | 4.1849   | 3.24157 | 0.52478  | ENSG00000080546:intron                               | ENSG00000271730 | 108998481-108999125 | + | 17011   |
| 6 | 109204034 | 109204295 | 262 | 109204060 | 3.49438  | 2.91742 | 0.30123  | ENSG00000203799:intron                               | ENSG00000203799 | 109165830-109355063 | + | 38334   |
| 6 | 113632425 | 113632635 | 211 | 113632489 | 4.31475  | 3.20475 | 0.59373  | ENSG00000230943:intron                               | ENSG00000230943 | 113616926-113650090 | - | 17560   |
| 6 | 113690739 | 113690985 | 247 | 113690861 | 9.09099  | 5.60604 | 4.18865  | intergenic                                           | ENSG00000230943 | 113616926-113650090 | - | -40771  |
| 6 | 113991751 | 113992017 | 267 | 113991826 | 4.32442  | 3.44941 | 0.59373  | ENSG00000196591:intron;E<br>NSG00000228624:intron    | ENSG00000196591 | 113933027-114011308 | - | 19424   |
| 6 | 114162505 | 114162767 | 263 | 114162613 | 7.17425  | 4.80518 | 2.52654  | ENSG00000249853:intron;E<br>NSG00000228624:intron    | ENSG00000212333 | 114220680-114220786 | - | 58150   |
| 6 | 114169365 | 114169694 | 330 | 114169438 | 4.56295  | 3.60388 | 0.59373  | ENSG00000249853:intron;E<br>NSG00000228624:intron    | ENSG00000212333 | 114220680-114220786 | - | 51257   |
| 6 | 114162505 | 114162767 | 263 | 114162613 | 7.17425  | 4.80518 | 2.52654  | ENSG00000249853:intron;E<br>NSG00000228624:intron    | ENSG00000212333 | 114220680-114220786 | - | 58150   |
| 6 | 114169365 | 114169694 | 330 | 114169438 | 4.56295  | 3.60388 | 0.59373  | ENSG00000249853:intron;E<br>NSG00000228624:intron    | ENSG00000212333 | 114220680-114220786 | - | 51257   |

|   |           |           |     |           |          |         |          |                                                     |                 |                     |   |         |
|---|-----------|-----------|-----|-----------|----------|---------|----------|-----------------------------------------------------|-----------------|---------------------|---|---------|
| 6 | 117545222 | 117545472 | 251 | 117545408 | 5.73591  | 4.07212 | 1.35894  | ENSG00000164465:intron;E<br>NSG00000282218:intron   | ENSG00000282218 | 117318210-117573571 | - | 28224   |
| 6 | 117692230 | 117692530 | 301 | 117692390 | 5.34519  | 3.973   | 1.09512  | ENSG00000153989:intron                              | ENSG00000153989 | 117675501-117710640 | + | 16878   |
| 6 | 117730267 | 117730477 | 211 | 117730381 | 3.03786  | 2.80302 | 0.15111  | intergenic                                          | ENSG00000153989 | 117675501-117710640 | + | 54870   |
| 6 | 119147382 | 119147725 | 344 | 119147601 | 15.38923 | 7.67141 | 9.96025  | ENSG00000253194:intron;E<br>NSG00000111879:intron   | ENSG00000111879 | 118959762-119149387 | - | 1834    |
| 6 | 128271257 | 128271513 | 257 | 128271285 | 4.31475  | 3.20475 | 0.59373  | ENSG00000152894:intron                              | ENSG00000224733 | 128500526-128501176 | + | -229141 |
| 6 | 129490525 | 129491263 | 739 | 129491120 | 18.62188 | 8.98605 | 13.04335 | ENSG00000196569:intron                              | ENSG00000233351 | 129479614-129481410 | - | -9483   |
| 6 | 129684045 | 129684321 | 277 | 129684106 | 6.51641  | 4.07877 | 1.96373  | ENSG00000146376:intron                              | ENSG00000146376 | 129576131-129710225 | - | 26042   |
| 6 | 129686919 | 129687207 | 289 | 129687082 | 7.96683  | 4.92425 | 3.22527  | ENSG00000146376:intron                              | ENSG00000146376 | 129576131-129710225 | - | 23162   |
| 6 | 129684045 | 129684321 | 277 | 129684106 | 6.51641  | 4.07877 | 1.96373  | ENSG00000146376:intron                              | ENSG00000146376 | 129576131-129710225 | - | 26042   |
| 6 | 129686919 | 129687207 | 289 | 129687082 | 7.96683  | 4.92425 | 3.22527  | ENSG00000146376:intron                              | ENSG00000146376 | 129576131-129710225 | - | 23162   |
| 6 | 129816577 | 129816825 | 249 | 129816763 | 3.49438  | 2.91742 | 0.30123  | intergenic                                          | ENSG00000219302 | 129819636-129820170 | - | 3469    |
| 6 | 130517411 | 130517696 | 286 | 130517570 | 10.34847 | 5.72262 | 5.33114  | intergenic                                          | ENSG00000202438 | 130573995-130574112 | - | 56559   |
| 6 | 130588271 | 130588547 | 277 | 130588421 | 4.56295  | 3.60388 | 0.59373  | intergenic                                          | ENSG00000202438 | 130573995-130574112 | - | -14296  |
| 6 | 130517411 | 130517696 | 286 | 130517570 | 10.34847 | 5.72262 | 5.33114  | intergenic                                          | ENSG00000202438 | 130573995-130574112 | - | 56559   |
| 6 | 130588271 | 130588547 | 277 | 130588421 | 4.56295  | 3.60388 | 0.59373  | intergenic                                          | ENSG00000202438 | 130573995-130574112 | - | -14296  |
| 6 | 133270248 | 133270791 | 544 | 133270454 | 4.84177  | 3.65305 | 0.77787  | ENSG00000112319:intron                              | ENSG00000112319 | 133240597-133532120 | + | 29922   |
| 6 | 134236052 | 134236303 | 252 | 134236223 | 8.18881  | 4.69185 | 3.39457  | ENSG00000118515:intron                              | ENSG00000200058 | 134257034-134257143 | + | -20857  |
| 6 | 134247176 | 134247402 | 227 | 134247257 | 5.37821  | 3.84986 | 1.09512  | ENSG00000118515:intron                              | ENSG00000200058 | 134257034-134257143 | + | -9745   |
| 6 | 134236052 | 134236303 | 252 | 134236223 | 8.18881  | 4.69185 | 3.39457  | ENSG00000118515:intron                              | ENSG00000200058 | 134257034-134257143 | + | -20857  |
| 6 | 134247176 | 134247402 | 227 | 134247257 | 5.37821  | 3.84986 | 1.09512  | ENSG00000118515:intron                              | ENSG00000200058 | 134257034-134257143 | + | -9745   |
| 6 | 134464952 | 134465342 | 391 | 134465114 | 3.56683  | 2.68164 | 0.30123  | ENSG00000236700:intron;E<br>NSG00000231971:intron   | ENSG00000236700 | 134437715-134504581 | + | 27431   |
| 6 | 137811440 | 137811682 | 243 | 137811528 | 5.13473  | 3.43925 | 0.98202  | intergenic                                          | ENSG00000234956 | 137730169-137792835 | - | -18725  |
| 6 | 137866868 | 137867087 | 220 | 137866975 | 6.79868  | 3.38039 | 2.20551  | ENSG00000118503:Promoter<br>:ENSG00000237499:intron | ENSG00000118503 | 137867187-137883312 | + | -210    |
| 6 | 139188498 | 139188856 | 359 | 139188750 | 5.75051  | 3.78743 | 1.36222  | ENSG00000231329:intron;E<br>NSG00000272446:intron   | ENSG00000231329 | 139144203-139239653 | - | 50976   |
| 6 | 139764706 | 139764994 | 289 | 139764873 | 7.3143   | 4.5382  | 2.6406   | ENSG00000231426:intron                              | ENSG00000231426 | 139677638-139860476 | + | 87211   |
| 6 | 140198955 | 140199311 | 357 | 140199192 | 4.56295  | 3.60388 | 0.59373  | intergenic                                          | ENSG00000263514 | 140205251-140205326 | + | -6118   |
| 6 | 140329951 | 140330191 | 241 | 140330080 | 4.458    | 3.53587 | 0.59373  | intergenic                                          | ENSG00000263514 | 140205251-140205326 | + | 124819  |
| 6 | 140385547 | 140385804 | 258 | 140385640 | 4.56295  | 3.60388 | 0.59373  | intergenic                                          | ENSG00000263514 | 140205251-140205326 | + | 180424  |
| 6 | 140744951 | 140745297 | 347 | 140745120 | 17.55853 | 7.81859 | 12.02348 | ENSG00000285875:intron                              | ENSG00000217684 | 140761528-140762262 | + | -16404  |
| 6 | 140774284 | 140774520 | 237 | 140774408 | 11.01631 | 5.89057 | 5.93639  | ENSG00000285875:intron                              | ENSG00000217684 | 140761528-140762262 | + | 12873   |
| 6 | 140744951 | 140745297 | 347 | 140745120 | 17.55853 | 7.81859 | 12.02348 | ENSG00000285875:intron                              | ENSG00000217684 | 140761528-140762262 | + | -16404  |
| 6 | 140774284 | 140774520 | 237 | 140774408 | 11.01631 | 5.89057 | 5.93639  | ENSG00000285875:intron                              | ENSG00000217684 | 140761528-140762262 | + | 12873   |
| 6 | 158207480 | 158207755 | 276 | 158207619 | 13.26553 | 7.20777 | 7.98923  | intergenic                                          | ENSG00000130338 | 158232235-158511828 | + | -24618  |
| 6 | 158869802 | 158870080 | 279 | 158869920 | 9.06429  | 5.18652 | 4.17525  | ENSG00000203711:Promoter                            | ENSG00000203711 | 158869938-158919105 | + | 2       |
| 6 | 159979206 | 159979490 | 285 | 159979345 | 6.26578  | 4.40475 | 1.75945  | ENSG00000197081:intron                              | ENSG00000197081 | 159969098-160113507 | + | 10249   |
| 6 | 161446740 | 161447037 | 298 | 161446911 | 5.39424  | 4.00432 | 1.09512  | ENSG00000185345:intron                              | ENSG0000026652  | 161129978-161274061 | - | -172827 |
| 7 | 831798    | 832047    | 250 | 831926    | 8.134    | 4.66145 | 3.3598   | ENSG00000164828:intron                              | ENSG00000164828 | 816614-896435       | + | 15308   |
| 7 | 1104356   | 1104574   | 219 | 1104541   | 5.40925  | 3.86905 | 1.10135  | ENSG00000146540:intron                              | ENSG00000164850 | 1082207-1093815     | + | 22257   |
| 7 | 1406753   | 1407015   | 263 | 1406943   | 5.66875  | 3.88202 | 1.31047  | intergenic                                          | ENSG00000164877 | 1428464-1459502     | - | 52618   |
| 7 | 2723109   | 2723360   | 252 | 2723170   | 4.26704  | 3.41232 | 0.58491  | ENSG00000174945:intron                              | ENSG00000174945 | 2679521-2775500     | + | 43713   |
| 7 | 2757963   | 2758247   | 285 | 2758062   | 8.8685   | 5.46977 | 4.02102  | ENSG00000174945:intron;E<br>NSG00000146535:intron   | ENSG00000231357 | 2835620-2836022     | + | -77515  |
| 7 | 2946531   | 2946766   | 236 | 2946686   | 4.48857  | 3.55567 | 0.59373  | ENSG00000237286:exon;ENS<br>G00000198286:intron     | ENSG00000237286 | 2944034-2947091     | + | 2614    |
| 7 | 3422348   | 3422567   | 220 | 3422490   | 5.39424  | 4.00432 | 1.09512  | ENSG00000146555:intron                              | ENSG00000224593 | 3337888-3338601     | + | 84569   |
| 7 | 3482163   | 3482440   | 278 | 3482354   | 4.1849   | 3.24157 | 0.52478  | ENSG00000146555:intron                              | ENSG00000224593 | 3337888-3338601     | + | 144413  |

|   |          |          |     |          |          |         |         |                                                    |                 |                   |   |         |
|---|----------|----------|-----|----------|----------|---------|---------|----------------------------------------------------|-----------------|-------------------|---|---------|
| 7 | 6990586  | 6990789  | 204 | 6990616  | 5.0924   | 3.81196 | 0.95207 | intergenic                                         | ENSG00000242731 | 6931683-6939603   | - | -51084  |
| 7 | 7945128  | 7945348  | 221 | 7945263  | 6.47492  | 3.91084 | 1.94623 | ENSG00000283549:intron;E<br>NSG00000219545:intron  | ENSG00000234141 | 7949852-7950709   | - | 5471    |
| 7 | 13849985 | 13850419 | 435 | 13850294 | 10.79066 | 5.97945 | 5.72727 | intergenic                                         | ENSG00000224330 | 13854354-13859025 | - | 8823    |
| 7 | 14687276 | 14687559 | 284 | 14687433 | 9.59377  | 5.70253 | 4.65976 | ENSG00000136267:intron<br>ENSG00000232790:intron;E | ENSG00000226323 | 14814130-14816565 | + | -126713 |
| 7 | 20960579 | 20960846 | 268 | 20960759 | 4.31475  | 3.20475 | 0.59373 | NSG00000285592:intron                              | ENSG00000285592 | 20959390-21028813 | - | 68101   |
| 7 | 21095009 | 21095333 | 325 | 21095218 | 4.56295  | 3.60388 | 0.59373 | intergenic                                         | ENSG00000285592 | 20959390-21028813 | - | -66357  |
| 7 | 20960579 | 20960846 | 268 | 20960759 | 4.31475  | 3.20475 | 0.59373 | ENSG00000232790:intron;E<br>NSG00000285592:intron  | ENSG00000285592 | 20959390-21028813 | - | 68101   |
| 7 | 21095009 | 21095333 | 325 | 21095218 | 4.56295  | 3.60388 | 0.59373 | intergenic                                         | ENSG00000285592 | 20959390-21028813 | - | -66357  |
| 7 | 21667819 | 21668046 | 228 | 21667883 | 4.919    | 3.70193 | 0.82412 | ENSG00000105877:intron                             | ENSG00000105877 | 21543214-21901839 | + | 124718  |
| 7 | 24036547 | 24036781 | 235 | 24036602 | 5.2079   | 3.88546 | 1.04111 | intergenic                                         | ENSG00000252041 | 24132704-24132837 | + | -96040  |
| 7 | 24290205 | 24290552 | 348 | 24290218 | 4.07388  | 3.28775 | 0.47041 | ENSG00000122585:intron                             | ENSG00000122585 | 24284162-24291865 | + | 6216    |
| 7 | 24383504 | 24383728 | 225 | 24383598 | 3.03786  | 2.80302 | 0.15111 | intergenic                                         | ENSG00000122585 | 24284162-24291865 | + | 99453   |
| 7 | 24821154 | 24821727 | 574 | 24821539 | 10.76521 | 5.96458 | 5.70713 | ENSG00000070882:intron                             | ENSG00000105928 | 24698350-24758113 | + | -63327  |
| 7 | 25031016 | 25031261 | 246 | 25031152 | 5.50544  | 3.52    | 1.18795 | intergenic                                         | ENSG00000070882 | 24796538-24981634 | - | -49504  |
| 7 | 25125445 | 25125702 | 258 | 25125544 | 8.99866  | 4.4694  | 4.12107 | ENSG00000172115:Promoter                           | ENSG00000172115 | 25120090-25125361 | - | -212    |
| 7 | 25964524 | 25964775 | 252 | 25964666 | 9.69963  | 5.35224 | 4.76095 | intergenic                                         | ENSG00000199085 | 25949918-25949986 | - | -14663  |
| 7 | 26613722 | 26613981 | 260 | 26613828 | 5.17447  | 3.86417 | 1.0143  | intergenic                                         | ENSG00000222004 | 26637870-26647305 | + | -24019  |
| 7 | 26666706 | 26666934 | 229 | 26666802 | 5.39424  | 4.00432 | 1.09512 | intergenic                                         | ENSG00000222004 | 26637870-26647305 | + | 28949   |
| 7 | 26744662 | 26744894 | 233 | 26744801 | 4.56295  | 3.60388 | 0.59373 | ENSG0000005020:intron                              | ENSG00000222004 | 26637870-26647305 | + | 106907  |
| 7 | 28207415 | 28207723 | 309 | 28207589 | 6.49439  | 4.38367 | 1.95029 | ENSG00000234336:intron                             | ENSG00000153814 | 27830572-28180743 | - | -26825  |
| 7 | 30778781 | 30779020 | 240 | 30778930 | 4.10177  | 3.30571 | 0.49129 | ENSG00000106125:intron;E<br>NSG00000254959:intron  | ENSG00000106125 | 30771416-30892387 | + | 7484    |
| 7 | 30984412 | 30984667 | 256 | 30984611 | 5.39424  | 4.00432 | 1.09512 | intergenic                                         | ENSG00000106128 | 30938668-30993254 | + | 45871   |
| 7 | 34375209 | 34375432 | 224 | 34375340 | 3.53832  | 2.94528 | 0.30123 | ENSG00000197085:intron                             | ENSG00000202431 | 34297495-34297598 | - | -77722  |
| 7 | 36119717 | 36119999 | 283 | 36119819 | 6.79012  | 4.3971  | 2.19778 | intergenic                                         | ENSG00000228815 | 36109023-36110872 | - | -8985   |
| 7 | 36966900 | 36967117 | 218 | 36967054 | 4.07388  | 3.28775 | 0.47041 | ENSG00000155849:intron                             | ENSG00000224101 | 36997795-37013630 | + | -30787  |
| 7 | 37032321 | 37032682 | 362 | 37032411 | 3.24979  | 2.85659 | 0.29383 | ENSG00000155849:intron                             | ENSG00000224101 | 36997795-37013630 | + | 34706   |
| 7 | 37709996 | 37710240 | 245 | 37710201 | 5.31032  | 3.95075 | 1.09512 | ENSG00000187037:intron;E<br>NSG00000086289:intron  | ENSG00000086289 | 37683842-37951941 | + | 26275   |
| 7 | 38694944 | 38695150 | 207 | 38694990 | 4.56295  | 3.60388 | 0.59373 | intergenic                                         | ENSG00000164556 | 38685345-38687037 | - | -8009   |
| 7 | 38798575 | 38798926 | 352 | 38798684 | 5.39424  | 4.00432 | 1.09512 | ENSG00000006715:intron                             | ENSG00000164556 | 38685345-38687037 | - | -111713 |
| 7 | 39105651 | 39106031 | 381 | 39105787 | 4.07388  | 3.28775 | 0.47041 | ENSG00000106536:intron                             | ENSG00000233854 | 38984242-39013551 | - | -92289  |
| 7 | 42168829 | 42169051 | 223 | 42168921 | 3.77589  | 3.20345 | 0.30123 | ENSG00000106571:intron                             | ENSG00000213721 | 42113364-42113620 | + | 55575   |
| 7 | 42551017 | 42551236 | 220 | 42551172 | 3.77589  | 3.20345 | 0.30123 | intergenic                                         | ENSG00000238284 | 42661725-42706447 | - | 155321  |
| 7 | 42704536 | 42704855 | 320 | 42704731 | 4.42776  | 3.51628 | 0.59373 | ENSG00000238284:intron                             | ENSG00000238284 | 42661725-42706447 | - | 1752    |
| 7 | 42951787 | 42952042 | 256 | 42951900 | 3.77589  | 3.20345 | 0.30123 | intergenic                                         | ENSG00000106588 | 42916856-42932223 | - | -19691  |
| 7 | 43072409 | 43072688 | 280 | 43072576 | 4.1849   | 3.24157 | 0.52478 | ENSG00000232006:intron                             | ENSG00000201933 | 43096731-43096844 | + | -24183  |
| 7 | 43318794 | 43319200 | 407 | 43319016 | 4.56295  | 3.60388 | 0.59373 | ENSG00000002746:intron                             | ENSG00000213717 | 43274158-43274582 | + | 44838   |
| 7 | 43322811 | 43323034 | 224 | 43322924 | 5.6497   | 4.01836 | 1.29426 | ENSG00000002746:intron                             | ENSG00000213717 | 43274158-43274582 | + | 48764   |
| 7 | 44639263 | 44639494 | 232 | 44639416 | 11.87429 | 5.03049 | 6.72258 | ENSG00000105953:intron                             | ENSG00000105953 | 44606571-44709066 | + | 32807   |
| 7 | 47475240 | 47475464 | 225 | 47475334 | 5.55463  | 3.31788 | 1.22984 | ENSG00000136205:intron                             | ENSG00000136205 | 47275153-47582558 | - | 107206  |
| 7 | 47669576 | 47669814 | 239 | 47669686 | 13.87404 | 4.9901  | 8.55472 | intergenic                                         | ENSG00000221845 | 47655243-47661648 | + | 14451   |
| 7 | 48699582 | 48699925 | 344 | 48699874 | 4.56295  | 3.60388 | 0.59373 | intergenic                                         | ENSG00000285536 | 48708326-48711582 | + | -8573   |
| 7 | 49349963 | 49350538 | 576 | 49350409 | 4.56295  | 3.60388 | 0.59373 | intergenic                                         | ENSG00000270763 | 49258492-49259846 | - | -90404  |
| 7 | 49488645 | 49488853 | 209 | 49488803 | 5.39424  | 4.00432 | 1.09512 | intergenic                                         | ENSG00000270763 | 49258492-49259846 | - | -228902 |
| 7 | 51997699 | 51998180 | 482 | 51997888 | 3.36259  | 2.93078 | 0.30123 | intergenic                                         | ENSG00000233960 | 52165234-52192913 | - | 194974  |
| 7 | 52124916 | 52125123 | 208 | 52125038 | 3.03786  | 2.80302 | 0.15111 | intergenic                                         | ENSG00000233960 | 52165234-52192913 | - | 67894   |
| 7 | 52714718 | 52714944 | 227 | 52714886 | 3.77589  | 3.20345 | 0.30123 | intergenic                                         | ENSG00000234304 | 52891836-52897807 | - | 182976  |

|   |           |           |     |           |          |         |          |                                                                           |                 |                     |   |         |
|---|-----------|-----------|-----|-----------|----------|---------|----------|---------------------------------------------------------------------------|-----------------|---------------------|---|---------|
| 7 | 52741138  | 52741360  | 223 | 52741140  | 3.02441  | 2.62206 | 0.15111  | intergenic                                                                | ENSG00000234304 | 52891836-52897807   | - | 156558  |
| 7 | 52714718  | 52714944  | 227 | 52714886  | 3.77589  | 3.20345 | 0.30123  | intergenic                                                                | ENSG00000234304 | 52891836-52897807   | - | 182976  |
| 7 | 52741138  | 52741360  | 223 | 52741140  | 3.02441  | 2.62206 | 0.15111  | intergenic                                                                | ENSG00000234304 | 52891836-52897807   | - | 156558  |
| 7 | 55120824  | 55121124  | 301 | 55121047  | 4.56295  | 3.60388 | 0.59373  | ENSG00000146648:intron                                                    | ENSG00000224057 | 55179749-55188934   | - | 67960   |
| 7 | 55127170  | 55127412  | 243 | 55127236  | 4.84177  | 3.65305 | 0.77787  | ENSG00000146648:intron                                                    | ENSG00000224057 | 55179749-55188934   | - | 61643   |
| 7 | 55533423  | 55533626  | 204 | 55533473  | 4.92533  | 3.11051 | 0.829    | ENSG00000154978:intron                                                    | ENSG00000154978 | 55436055-55572988   | - | 39464   |
| 7 | 55534327  | 55534734  | 408 | 55534503  | 25.86516 | 7.9306  | 20.03412 | ENSG00000154978:intron                                                    | ENSG00000154978 | 55436055-55572988   | - | 38458   |
| 7 | 55945205  | 55945448  | 244 | 55945324  | 4.76929  | 3.60726 | 0.74587  | ENSG00000249773:intron                                                    | ENSG00000146729 | 55951792-56000181   | + | -6466   |
| 7 | 61850843  | 61851082  | 240 | 61850972  | 7.19325  | 4.46755 | 2.54492  | intergenic                                                                | ENSG00000233918 | 62275360-62275678   | - | 424716  |
| 7 | 61957177  | 61957401  | 225 | 61957265  | 5.39424  | 4.00432 | 1.09512  | intergenic                                                                | ENSG00000233918 | 62275360-62275678   | - | 318389  |
| 7 | 62402757  | 62402998  | 242 | 62402974  | 4.31475  | 3.20475 | 0.59373  | intergenic                                                                | ENSG00000233918 | 62275360-62275678   | - | -127199 |
| 7 | 61850843  | 61851082  | 240 | 61850972  | 7.19325  | 4.46755 | 2.54492  | intergenic                                                                | ENSG00000233918 | 62275360-62275678   | - | 424716  |
| 7 | 61957177  | 61957401  | 225 | 61957265  | 5.39424  | 4.00432 | 1.09512  | intergenic                                                                | ENSG00000233918 | 62275360-62275678   | - | 318389  |
| 7 | 62402757  | 62402998  | 242 | 62402974  | 4.31475  | 3.20475 | 0.59373  | intergenic                                                                | ENSG00000233918 | 62275360-62275678   | - | -127199 |
| 7 | 61850843  | 61851082  | 240 | 61850972  | 7.19325  | 4.46755 | 2.54492  | intergenic                                                                | ENSG00000233918 | 62275360-62275678   | - | 424716  |
| 7 | 61957177  | 61957401  | 225 | 61957265  | 5.39424  | 4.00432 | 1.09512  | intergenic                                                                | ENSG00000233918 | 62275360-62275678   | - | 318389  |
| 7 | 62402757  | 62402998  | 242 | 62402974  | 4.31475  | 3.20475 | 0.59373  | intergenic                                                                | ENSG00000233918 | 62275360-62275678   | - | -127199 |
| 7 | 64522366  | 64522629  | 264 | 64522561  | 3.77589  | 3.20345 | 0.30123  | ENSG00000173041:intron                                                    | ENSG00000228653 | 64500824-64501729   | + | 21673   |
| 7 | 65385885  | 65386126  | 242 | 65386081  | 5.56876  | 3.96799 | 1.238    | ENSG00000146757:intron                                                    | ENSG00000146757 | 65373798-65401135   | + | 12207   |
| 7 | 66293401  | 66293775  | 375 | 66293546  | 5.39424  | 4.00432 | 1.09512  | ENSG00000169902:intron                                                    | ENSG00000252126 | 66344302-66344414   | + | -50714  |
| 7 | 67794312  | 67794576  | 265 | 67794370  | 4.56295  | 3.60388 | 0.59373  | intergenic                                                                | ENSG00000223948 | 67769628-67770468   | - | -23975  |
| 7 | 69192840  | 69193079  | 240 | 69193043  | 4.56295  | 3.60388 | 0.59373  | intergenic                                                                | ENSG00000236839 | 69187832-69189318   | - | -3641   |
| 7 | 73851511  | 73851790  | 280 | 73851673  | 13.56604 | 6.40949 | 8.26891  | intergenic                                                                | ENSG00000165171 | 73834589-73842535   | - | -9115   |
| 7 | 76898658  | 76898898  | 241 | 76898717  | 8.1168   | 5.20561 | 3.35333  | ENSG00000285666:intron                                                    | ENSG00000231183 | 76902490-76919191   | + | -3712   |
| 7 | 77820255  | 77820582  | 328 | 77820407  | 3.27191  | 2.87113 | 0.30123  | ENSG00000006576:intron                                                    | ENSG00000006576 | 77798791-77957503   | + | 21627   |
| 7 | 78071182  | 78071385  | 204 | 78071236  | 3.77589  | 3.20345 | 0.30123  | ENSG00000187391:intron                                                    | ENSG00000281008 | 78134078-78134851   | + | -62795  |
| 7 | 78113994  | 78114205  | 212 | 78114158  | 4.07388  | 3.28775 | 0.47041  | ENSG00000187391:intron                                                    | ENSG00000281008 | 78134078-78134851   | + | -19979  |
| 7 | 78142228  | 78142610  | 383 | 78142264  | 3.34993  | 2.92244 | 0.30123  | ENSG00000187391:intron                                                    | ENSG00000281008 | 78134078-78134851   | + | 8340    |
| 7 | 78496154  | 78496372  | 219 | 78496266  | 3.49438  | 2.91742 | 0.30123  | ENSG00000187391:intron                                                    | ENSG00000226230 | 78486529-78487028   | + | 9733    |
| 7 | 81257269  | 81257562  | 294 | 81257315  | 5.39424  | 4.00432 | 1.09512  | intergenic                                                                | ENSG00000226671 | 81191397-81192009   | + | 66018   |
| 7 | 84058822  | 84059125  | 304 | 84058953  | 5.01585  | 3.49609 | 0.89533  | intergenic                                                                | ENSG00000230244 | 83663418-83664625   | + | 395555  |
| 7 | 90551771  | 90552039  | 269 | 90551836  | 5.19114  | 3.87478 | 1.02732  | intergenic                                                                | ENSG00000223969 | 90590618-90597353   | - | 45448   |
| 7 | 91446430  | 91446635  | 206 | 91446551  | 4.51948  | 3.5757  | 0.59373  | ENSG00000235450:intron;E                                                  | ENSG00000235450 | 91380777-91556848   | - | 110316  |
| 7 | 91545406  | 91545830  | 425 | 91545519  | 4.56295  | 3.60388 | 0.59373  | NSG00000243144:intron                                                     | ENSG00000235450 | 91380777-91556848   | - | 11230   |
| 7 | 91546559  | 91546765  | 207 | 91546623  | 5.39424  | 4.00432 | 1.09512  | ENSG00000235450:intron                                                    | ENSG00000235450 | 91380777-91556848   | - | 10186   |
| 7 | 92633365  | 92633665  | 301 | 92633512  | 6.51641  | 4.07877 | 1.96373  | ENSG00000105810:intron                                                    | ENSG00000234545 | 92560792-92590394   | - | -43120  |
| 7 | 93773148  | 93773351  | 204 | 93773289  | 3.77589  | 3.20345 | 0.30123  | ENSG00000127928:intron                                                    | ENSG00000225898 | 93777838-93778514   | + | -4589   |
| 7 | 93784576  | 93784803  | 228 | 93784685  | 4.91514  | 3.56573 | 0.82412  | ENSG00000127928:intron                                                    | ENSG00000225898 | 93777838-93778514   | + | 6851    |
| 7 | 94007681  | 94007956  | 276 | 94007702  | 3.88371  | 3.16559 | 0.37576  | ENSG00000236861:intron                                                    | ENSG00000105829 | 93962761-94004382   | - | -3436   |
| 7 | 94620716  | 94621005  | 290 | 94620872  | 11.66864 | 5.82681 | 6.52722  | ENSG00000127990:intron                                                    | ENSG00000242265 | 94656324-94669695   | + | -35464  |
| 7 | 97459946  | 97460358  | 413 | 97460088  | 3.77589  | 3.20345 | 0.30123  | intergenic                                                                | ENSG00000226046 | 97437517-97437896   | + | 22634   |
| 7 | 99876388  | 99876658  | 271 | 99876516  | 4.11517  | 3.31434 | 0.49781  | ENSG00000244623:exon                                                      | ENSG00000244623 | 99875986-99877057   | - | 534     |
| 7 | 100344854 | 100345160 | 307 | 100344998 | 15.03591 | 6.29939 | 9.62995  | ENSG00000242294:intron;E                                                  | ENSG00000078319 | 100320991-100341908 | - | -3098   |
| 7 | 101138540 | 101138782 | 243 | 101138636 | 8.3074   | 5.12886 | 3.50022  | NSG00000272752:intron<br>ENSG00000106366:three_prime_UTR;ENSG00000106366: | ENSG00000106366 | 101127088-101139266 | + | 11572   |
| 7 | 101739826 | 101740073 | 248 | 101739949 | 11.53275 | 5.55571 | 6.4016   | exon<br>intergenic                                                        | ENSG00000257923 | 101815903-102283958 | + | -75954  |
| 7 | 103519545 | 103519847 | 303 | 103519762 | 5.6497   | 4.01836 | 1.29426  | ENSG00000189056:intron                                                    | ENSG00000222386 | 103484207-103484539 | - | -35156  |
| 7 | 106346712 | 106346933 | 222 | 106346790 | 10.20694 | 5.24451 | 5.19796  | intergenic                                                                | ENSG00000243438 | 106315224-106315743 | + | 31598   |

|   |           |           |     |           |          |         |         |                                                     |                 |                     |   |         |
|---|-----------|-----------|-----|-----------|----------|---------|---------|-----------------------------------------------------|-----------------|---------------------|---|---------|
| 7 | 107585410 | 107585853 | 444 | 107585813 | 3.20396  | 2.64557 | 0.26167 | ENSG00000075790:intron                              | ENSG00000272854 | 107579556-107580057 | - | -5574   |
| 7 | 107728418 | 107728632 | 215 | 107728575 | 5.01585  | 3.49609 | 0.89533 | intergenic                                          | ENSG00000105879 | 107743696-107761667 | + | -15171  |
| 7 | 109169823 | 109170056 | 234 | 109170032 | 4.19696  | 3.36708 | 0.53407 | intergenic                                          | ENSG00000230941 | 109322319-109326315 | - | 156376  |
| 7 | 109205958 | 109206202 | 245 | 109206059 | 4.00012  | 3.12743 | 0.45978 | intergenic                                          | ENSG00000230941 | 109322319-109326315 | - | 120235  |
| 7 | 109563242 | 109563448 | 207 | 109563400 | 3.90845  | 3.18146 | 0.39391 | ENSG00000234273:intron                              | ENSG00000234273 | 109521980-109597166 | - | 33821   |
| 7 | 109613121 | 109613353 | 233 | 109613267 | 5.6497   | 4.01836 | 1.29426 | intergenic                                          | ENSG00000234273 | 109521980-109597166 | - | -16070  |
| 7 | 109893154 | 109893537 | 384 | 109893379 | 6.31582  | 4.27407 | 1.80607 | intergenic                                          | ENSG00000237064 | 109959217-109960184 | - | 66839   |
| 7 | 110273491 | 110273763 | 273 | 110273536 | 6.47779  | 4.37345 | 1.94623 | intergenic                                          | ENSG00000278424 | 110215890-110216380 | + | 57736   |
| 7 | 110919164 | 110919466 | 303 | 110919294 | 12.13524 | 6.07965 | 6.96558 | ENSG00000184903:intron                              | ENSG00000173114 | 111091005-111125454 | + | -171690 |
| 7 | 111054276 | 111054572 | 297 | 111054333 | 3.69375  | 3.04415 | 0.30123 | ENSG00000184903:intron                              | ENSG00000173114 | 111091005-111125454 | + | -36581  |
| 7 | 110919164 | 110919466 | 303 | 110919294 | 12.13524 | 6.07965 | 6.96558 | ENSG00000184903:intron                              | ENSG00000173114 | 111091005-111125454 | + | -171690 |
| 7 | 111054276 | 111054572 | 297 | 111054333 | 3.69375  | 3.04415 | 0.30123 | ENSG00000184903:intron                              | ENSG00000173114 | 111091005-111125454 | + | -36581  |
| 7 | 111953639 | 111953855 | 217 | 111953811 | 4.57196  | 3.35828 | 0.60151 | ENSG00000128512:intron;E<br>NSG00000222346:Promoter | ENSG00000222346 | 111953652-111953765 | - | 18      |
| 7 | 112016575 | 112016846 | 272 | 112016684 | 5.68188  | 3.88989 | 1.31322 | ENSG00000128512:intron                              | ENSG00000234358 | 111971221-111971988 | - | -44722  |
| 7 | 112902003 | 112902210 | 208 | 112902050 | 4.45692  | 3.17469 | 0.59373 | ENSG00000164603:intron                              | ENSG00000164603 | 112819146-112939916 | - | 37810   |
| 7 | 112911062 | 112911296 | 235 | 112911144 | 4.00012  | 3.12743 | 0.45978 | ENSG00000164603:intron                              | ENSG00000164603 | 112819146-112939916 | - | 28737   |
| 7 | 117267469 | 117267681 | 213 | 117267618 | 3.6499   | 2.91341 | 0.30123 | intergenic                                          | ENSG00000230785 | 117262917-117264888 | - | -2686   |
| 7 | 118901961 | 118902222 | 262 | 118902149 | 4.07388  | 3.28775 | 0.47041 | intergenic                                          | ENSG00000229982 | 118880102-118881288 | - | -20803  |
| 7 | 119974945 | 119975321 | 377 | 119975134 | 3.64836  | 3.01523 | 0.30123 | intergenic                                          | ENSG00000271739 | 120005975-120006101 | - | 30968   |
| 7 | 120233186 | 120233390 | 205 | 120233324 | 3.56683  | 2.68164 | 0.30123 | intergenic                                          | ENSG00000184408 | 120273667-120750331 | + | -40379  |
| 7 | 120288644 | 120288856 | 213 | 120288707 | 5.56876  | 3.96799 | 1.238   | ENSG00000184408:intron                              | ENSG00000184408 | 120273667-120750331 | + | 15082   |
| 7 | 120404588 | 120405223 | 636 | 120405181 | 4.1849   | 3.24157 | 0.52478 | ENSG00000184408:intron                              | ENSG00000184408 | 120273667-120750331 | + | 131238  |
| 7 | 121138390 | 121138620 | 231 | 121138467 | 3.95704  | 2.57553 | 0.43404 | ENSG00000106034:intron                              | ENSG00000212628 | 121083699-121083813 | - | -54691  |
| 7 | 121174440 | 121174723 | 284 | 121174631 | 7.3143   | 4.5382  | 2.6406  | ENSG00000106034:intron                              | ENSG00000207090 | 121194947-121195057 | - | 20476   |
| 7 | 121175553 | 121175847 | 295 | 121175762 | 3.6812   | 2.9324  | 0.30123 | ENSG00000106034:intron                              | ENSG00000207090 | 121194947-121195057 | - | 19357   |
| 7 | 121278744 | 121279075 | 332 | 121278887 | 9.5279   | 4.89046 | 4.5986  | ENSG00000106034:intron                              | ENSG00000002745 | 121325366-121341104 | + | -46457  |
| 7 | 121478668 | 121478881 | 214 | 121478739 | 3.94435  | 3.09315 | 0.42361 | intergenic                                          | ENSG00000234985 | 121440833-121441261 | - | -37513  |
| 7 | 121530441 | 121530801 | 361 | 121530675 | 5.84361  | 3.7038  | 1.44168 | intergenic                                          | ENSG00000234985 | 121440833-121441261 | - | -89359  |
| 7 | 121544788 | 121545134 | 347 | 121544944 | 11.17905 | 5.37582 | 6.08588 | intergenic                                          | ENSG00000234985 | 121440833-121441261 | - | -103699 |
| 7 | 121478668 | 121478881 | 214 | 121478739 | 3.94435  | 3.09315 | 0.42361 | intergenic                                          | ENSG00000234985 | 121440833-121441261 | - | -37513  |
| 7 | 121530441 | 121530801 | 361 | 121530675 | 5.84361  | 3.7038  | 1.44168 | intergenic                                          | ENSG00000234985 | 121440833-121441261 | - | -89359  |
| 7 | 121544788 | 121545134 | 347 | 121544944 | 11.17905 | 5.37582 | 6.08588 | intergenic                                          | ENSG00000234985 | 121440833-121441261 | - | -103699 |
| 7 | 121983604 | 121983811 | 208 | 121983751 | 4.82376  | 3.51022 | 0.77787 | ENSG00000106278:exon                                | ENSG00000252003 | 122081719-122081781 | + | -98012  |
| 7 | 122053098 | 122053316 | 219 | 122053298 | 3.81246  | 2.91013 | 0.32594 | ENSG00000106278:intron                              | ENSG00000252003 | 122081719-122081781 | + | -28512  |
| 7 | 122081030 | 122081261 | 232 | 122081111 | 4.1849   | 3.24157 | 0.52478 | ENSG00000252003:Promoter<br>;ENSG00000008311:intron | ENSG00000252003 | 122081719-122081781 | + | -574    |
| 7 | 122377590 | 122377970 | 381 | 122377854 | 4.68284  | 3.42499 | 0.68513 | ENSG00000081803:intron;E<br>NSG00000240499:intron   | ENSG00000240499 | 122328468-122440388 | + | 49311   |
| 7 | 122397677 | 122398109 | 433 | 122398007 | 4.8107   | 3.50229 | 0.77787 | ENSG00000081803:intron;E<br>NSG00000240499:intron   | ENSG00000240499 | 122328468-122440388 | + | 69424   |
| 7 | 122454950 | 122455160 | 211 | 122455099 | 3.88371  | 3.16559 | 0.37576 | ENSG00000081803:intron                              | ENSG00000240499 | 122328468-122440388 | + | 126586  |
| 7 | 122377590 | 122377970 | 381 | 122377854 | 4.68284  | 3.42499 | 0.68513 | ENSG00000081803:intron;E<br>NSG00000240499:intron   | ENSG00000240499 | 122328468-122440388 | + | 49311   |
| 7 | 122397677 | 122398109 | 433 | 122398007 | 4.8107   | 3.50229 | 0.77787 | ENSG00000081803:intron;E<br>NSG00000240499:intron   | ENSG00000240499 | 122328468-122440388 | + | 69424   |
| 7 | 122454950 | 122455160 | 211 | 122455099 | 3.88371  | 3.16559 | 0.37576 | ENSG00000081803:intron                              | ENSG00000240499 | 122328468-122440388 | + | 126586  |
| 7 | 122638799 | 122639026 | 228 | 122638968 | 4.11506  | 3.19834 | 0.49781 | ENSG00000081803:intron                              | ENSG00000225795 | 122676579-122676811 | - | -37667  |
| 7 | 124270527 | 124270759 | 233 | 124270739 | 3.90052  | 3.06626 | 0.38783 | ENSG00000242593:intron                              | ENSG00000243574 | 124274678-124287544 | + | 16901   |
| 7 | 125578414 | 125578645 | 232 | 125578573 | 3.10079  | 2.75883 | 0.19252 | intergenic                                          | ENSG00000227869 | 125431346-125466401 | + | 147183  |
| 7 | 126093592 | 126093845 | 254 | 126093804 | 4.383    | 3.48731 | 0.59373 | intergenic                                          | ENSG00000197462 | 125917870-125933832 | + | 175848  |

|   |           |           |     |           |          |         |          |                                                                                        |                 |                     |   |         |
|---|-----------|-----------|-----|-----------|----------|---------|----------|----------------------------------------------------------------------------------------|-----------------|---------------------|---|---------|
| 7 | 130960324 | 130960606 | 283 | 130960511 | 5.40704  | 3.35205 | 1.10135  | ENSG00000231721:intron;E<br>NSG00000285106:intron                                      | ENSG00000273319 | 130936463-130939661 | + | 24001   |
| 7 | 133645462 | 133646022 | 561 | 133645481 | 3.6499   | 2.91341 | 0.30123  | ENSG00000131558:intron                                                                 | ENSG00000235967 | 133727367-133727734 | - | 81992   |
| 7 | 134174819 | 134175079 | 261 | 134174915 | 8.31326  | 4.76113 | 3.50375  | ENSG00000155530:intron                                                                 | ENSG00000155530 | 134127298-134264591 | + | 47650   |
| 7 | 137070962 | 137071216 | 255 | 137071050 | 3.20396  | 2.64557 | 0.26167  | ENSG00000234352:intron                                                                 | ENSG00000224469 | 137164042-137164612 | + | -92953  |
| 7 | 137078796 | 137079018 | 223 | 137078907 | 5.88285  | 4.01078 | 1.4765   | ENSG00000234352:intron                                                                 | ENSG00000224469 | 137164042-137164612 | + | -85135  |
| 7 | 137337701 | 137338016 | 316 | 137337933 | 4.58409  | 3.36557 | 0.61075  | ENSG00000105894:intron                                                                 | ENSG00000105894 | 137227340-137343865 | - | 6007    |
| 7 | 137751443 | 137751710 | 268 | 137751619 | 6.13439  | 3.86438 | 1.6842   | ENSG00000157680:intron                                                                 | ENSG00000230383 | 137721984-137722846 | + | 29592   |
| 7 | 139916471 | 139916838 | 368 | 139916615 | 36.33923 | 9.8649  | 30.22827 | ENSG00000059377:intron                                                                 | ENSG00000064393 | 139561569-139777778 | - | -138876 |
| 7 | 140876706 | 140877068 | 363 | 140876897 | 10.5753  | 5.64189 | 5.54838  | ENSG00000157764:intron                                                                 | ENSG00000271932 | 140884071-140884178 | + | -7184   |
| 7 | 140927483 | 140927699 | 217 | 140927509 | 3.36027  | 2.73883 | 0.30123  | intergenic                                                                             | ENSG00000157764 | 140719326-140924928 | + | -2662   |
| 7 | 141557959 | 141558214 | 256 | 141558083 | 9.68134  | 5.14987 | 4.74279  | ENSG00000006530:intron<br>ENSG00000257093:exon;ENS                                     | ENSG00000261570 | 141529202-141551304 | - | -6782   |
| 7 | 141661142 | 141661456 | 315 | 141661411 | 4.14279  | 3.10309 | 0.51135  | G00000257093:three_prime<br>UTR                                                        | ENSG00000270157 | 141662921-141663846 | - | 2547    |
| 7 | 142188218 | 142188482 | 265 | 142188337 | 9.13305  | 4.25545 | 4.22677  | ENSG00000257743:intron                                                                 | ENSG00000240268 | 142240739-142247067 | - | 58717   |
| 7 | 142555705 | 142555967 | 263 | 142555746 | 4.2748   | 3.0719  | 0.58762  | intergenic                                                                             | ENSG00000276597 | 142554835-142555318 | + | 1000    |
| 7 | 142556727 | 142557004 | 278 | 142556835 | 5.26629  | 3.39198 | 1.07888  | intergenic                                                                             | ENSG00000276597 | 142554835-142555318 | + | 2030    |
| 7 | 142555705 | 142555967 | 263 | 142555746 | 4.2748   | 3.0719  | 0.58762  | intergenic                                                                             | ENSG00000276597 | 142554835-142555318 | + | 1000    |
| 7 | 142556727 | 142557004 | 278 | 142556835 | 5.26629  | 3.39198 | 1.07888  | intergenic                                                                             | ENSG00000276597 | 142554835-142555318 | + | 2030    |
| 7 | 142808827 | 142809051 | 225 | 142808932 | 4.11463  | 2.71871 | 0.49781  | intergenic                                                                             | ENSG00000237254 | 142812585-142813399 | - | 4460    |
| 7 | 144496113 | 144496368 | 256 | 144496243 | 4.14216  | 3.33173 | 0.51073  | ENSG00000196511:intron                                                                 | ENSG00000221507 | 144451680-144451817 | + | 44560   |
| 7 | 144512081 | 144512357 | 277 | 144512286 | 5.55248  | 3.95787 | 1.22965  | ENSG00000196511:intron                                                                 | ENSG00000221507 | 144451680-144451817 | + | 60538   |
| 7 | 144496113 | 144496368 | 256 | 144496243 | 4.14216  | 3.33173 | 0.51073  | ENSG00000196511:intron                                                                 | ENSG00000221507 | 144451680-144451817 | + | 44560   |
| 7 | 144512081 | 144512357 | 277 | 144512286 | 5.55248  | 3.95787 | 1.22965  | ENSG00000196511:intron                                                                 | ENSG00000221507 | 144451680-144451817 | + | 60538   |
| 7 | 145520623 | 145520918 | 296 | 145520787 | 7.60321  | 4.88949 | 2.89017  | intergenic                                                                             | ENSG00000231839 | 145583196-145584817 | + | -62426  |
| 7 | 145523020 | 145523294 | 275 | 145523102 | 5.58512  | 3.97816 | 1.25272  | intergenic                                                                             | ENSG00000231839 | 145583196-145584817 | + | -60039  |
| 7 | 145520623 | 145520918 | 296 | 145520787 | 7.60321  | 4.88949 | 2.89017  | intergenic                                                                             | ENSG00000231839 | 145583196-145584817 | + | -62426  |
| 7 | 145523020 | 145523294 | 275 | 145523102 | 5.58512  | 3.97816 | 1.25272  | intergenic                                                                             | ENSG00000231839 | 145583196-145584817 | + | -60039  |
| 7 | 145684129 | 145684360 | 232 | 145684315 | 4.30911  | 3.31873 | 0.59373  | intergenic                                                                             | ENSG00000230746 | 145675881-145681369 | - | -2875   |
| 7 | 145794768 | 145795097 | 330 | 145795036 | 4.1849   | 3.24157 | 0.52478  | intergenic                                                                             | ENSG00000230746 | 145675881-145681369 | - | -113563 |
| 7 | 145684129 | 145684360 | 232 | 145684315 | 4.30911  | 3.31873 | 0.59373  | intergenic                                                                             | ENSG00000230746 | 145675881-145681369 | - | -2875   |
| 7 | 145794768 | 145795097 | 330 | 145795036 | 4.1849   | 3.24157 | 0.52478  | intergenic                                                                             | ENSG00000230746 | 145675881-145681369 | - | -113563 |
| 7 | 146804224 | 146804548 | 325 | 146804355 | 6.75501  | 4.37612 | 2.16881  | ENSG00000174469:intron                                                                 | ENSG00000236795 | 147080933-147097609 | - | 293223  |
| 7 | 147005468 | 147005690 | 223 | 147005565 | 4.69706  | 3.56173 | 0.69764  | ENSG00000174469:intron                                                                 | ENSG00000236795 | 147080933-147097609 | - | 92030   |
| 7 | 147087932 | 147088156 | 225 | 147087964 | 4.49014  | 3.43176 | 0.59373  | ENSG00000236795:intron;E<br>NSG00000174469:intron                                      | ENSG00000236795 | 147080933-147097609 | - | 9565    |
| 7 | 146804224 | 146804548 | 325 | 146804355 | 6.75501  | 4.37612 | 2.16881  | ENSG00000174469:intron                                                                 | ENSG00000236795 | 147080933-147097609 | - | 293223  |
| 7 | 147005468 | 147005690 | 223 | 147005565 | 4.69706  | 3.56173 | 0.69764  | ENSG00000174469:intron                                                                 | ENSG00000236795 | 147080933-147097609 | - | 92030   |
| 7 | 147087932 | 147088156 | 225 | 147087964 | 4.49014  | 3.43176 | 0.59373  | ENSG00000236795:intron;E<br>NSG00000174469:intron                                      | ENSG00000236795 | 147080933-147097609 | - | 9565    |
| 7 | 147310878 | 147311136 | 259 | 147310971 | 5.97849  | 4.06862 | 1.55475  | ENSG00000174469:intron                                                                 | ENSG00000221442 | 147378016-147378121 | - | 67114   |
| 7 | 147630016 | 147630235 | 220 | 147630108 | 5.39672  | 3.71993 | 1.09738  | ENSG00000174469:intron                                                                 | ENSG00000230190 | 147671710-147673143 | + | -41585  |
| 7 | 147766163 | 147766395 | 233 | 147766352 | 5.61808  | 3.99867 | 1.27988  | ENSG00000174469:intron                                                                 | ENSG00000270634 | 147704293-147704575 | - | -61703  |
| 7 | 148564663 | 148564909 | 247 | 148564797 | 10.60166 | 5.08797 | 5.56659  | ENSG00000283648:intron                                                                 | ENSG00000283648 | 148543676-148572177 | - | 7391    |
| 7 | 149318175 | 149318391 | 217 | 149318292 | 5.45233  | 3.75292 | 1.13858  | intergenic                                                                             | ENSG00000231397 | 149321864-149322092 | - | 3809    |
| 7 | 149873750 | 149874146 | 397 | 149873810 | 5.2792   | 3.39885 | 1.08834  | ENSG00000171130:exon;ENS<br>G00000204934:intron;ENSG<br>00000171130:five_prime_U<br>TR | ENSG00000171130 | 149872967-149891204 | + | 980     |



|   |           |           |     |           |          |         |          |   |                          |                 |                     |   |         |
|---|-----------|-----------|-----|-----------|----------|---------|----------|---|--------------------------|-----------------|---------------------|---|---------|
|   |           |           |     |           |          |         |          |   | ENSG00000284041:Promoter |                 |                     |   |         |
| 7 | 150367938 | 150368236 | 299 | 150368078 | 19.84129 | 6.50196 | 14.21805 | ; | ENSG00000214022:Promoter | ENSG00000214022 | 150368188-150374044 | + | -101    |
|   |           |           |     |           |          |         |          |   | r:ENSG00000240449:intron |                 |                     |   |         |
| 7 | 152193701 | 152194221 | 521 | 152194173 | 4.39825  | 3.3743  | 0.59373  |   | ENSG00000055609:intron   | ENSG00000213188 | 152128878-152129686 | + | 65082   |
| 7 | 152244677 | 152244881 | 205 | 152244754 | 8.2953   | 4.7511  | 3.48851  |   | ENSG00000055609:intron   | ENSG00000213188 | 152128878-152129686 | + | 115900  |
| 7 | 152193701 | 152194221 | 521 | 152194173 | 4.39825  | 3.3743  | 0.59373  |   | ENSG00000055609:intron   | ENSG00000213188 | 152128878-152129686 | + | 65082   |
| 7 | 152244677 | 152244881 | 205 | 152244754 | 8.2953   | 4.7511  | 3.48851  |   | ENSG00000055609:intron   | ENSG00000213188 | 152128878-152129686 | + | 115900  |
| 7 | 153070299 | 153070548 | 250 | 153070359 | 4.5035   | 3.44013 | 0.59373  |   | intergenic               | ENSG00000224104 | 153144312-153144588 | - | 74165   |
| 7 | 153412287 | 153412797 | 511 | 153412403 | 4.45692  | 3.17469 | 0.59373  |   | ENSG00000234722:intron   | ENSG00000234722 | 153355364-153413981 | - | 1439    |
| 7 | 153866047 | 153866261 | 215 | 153866112 | 4.45692  | 3.17469 | 0.59373  |   | intergenic               | ENSG00000130226 | 153887096-154894285 | + | -20942  |
| 7 | 154488601 | 154489020 | 420 | 154488699 | 3.02441  | 2.62206 | 0.15111  |   | ENSG00000130226:intron   | ENSG00000236408 | 154838387-154865483 | - | 376673  |
| 7 | 154608671 | 154609130 | 460 | 154609039 | 4.07388  | 3.28775 | 0.47041  |   | ENSG00000130226:intron   | ENSG00000236408 | 154838387-154865483 | - | 256583  |
| 7 | 154652698 | 154652908 | 211 | 154652822 | 3.53038  | 3.04135 | 0.30123  |   | ENSG00000130226:intron   | ENSG00000236408 | 154838387-154865483 | - | 212680  |
| 7 | 154784464 | 154784810 | 347 | 154784655 | 4.23916  | 3.15996 | 0.56297  |   | ENSG00000130226:intron   | ENSG00000236408 | 154838387-154865483 | - | 80846   |
| 7 | 154488601 | 154489020 | 420 | 154488699 | 3.02441  | 2.62206 | 0.15111  |   | ENSG00000130226:intron   | ENSG00000236408 | 154838387-154865483 | - | 376673  |
| 7 | 154608671 | 154609130 | 460 | 154609039 | 4.07388  | 3.28775 | 0.47041  |   | ENSG00000130226:intron   | ENSG00000236408 | 154838387-154865483 | - | 256583  |
| 7 | 154652698 | 154652908 | 211 | 154652822 | 3.53038  | 3.04135 | 0.30123  |   | ENSG00000130226:intron   | ENSG00000236408 | 154838387-154865483 | - | 212680  |
| 7 | 154784464 | 154784810 | 347 | 154784655 | 4.23916  | 3.15996 | 0.56297  |   | ENSG00000130226:intron   | ENSG00000236408 | 154838387-154865483 | - | 80846   |
| 7 | 154488601 | 154489020 | 420 | 154488699 | 3.02441  | 2.62206 | 0.15111  |   | ENSG00000130226:intron   | ENSG00000236408 | 154838387-154865483 | - | 376673  |
| 7 | 154608671 | 154609130 | 460 | 154609039 | 4.07388  | 3.28775 | 0.47041  |   | ENSG00000130226:intron   | ENSG00000236408 | 154838387-154865483 | - | 256583  |
| 7 | 154652698 | 154652908 | 211 | 154652822 | 3.53038  | 3.04135 | 0.30123  |   | ENSG00000130226:intron   | ENSG00000236408 | 154838387-154865483 | - | 212680  |
| 7 | 154784464 | 154784810 | 347 | 154784655 | 4.23916  | 3.15996 | 0.56297  |   | ENSG00000130226:intron   | ENSG00000236408 | 154838387-154865483 | - | 80846   |
| 7 | 157368687 | 157368922 | 236 | 157368877 | 4.15047  | 3.22024 | 0.51719  |   | ENSG00000105993:intron   | ENSG00000105993 | 157335380-157417439 | + | 33424   |
| 7 | 158283619 | 158283839 | 221 | 158283669 | 3.64136  | 2.90822 | 0.30123  |   | ENSG00000155093:intron   | ENSG00000207637 | 158532717-158532813 | - | 249084  |
| 7 | 158381324 | 158381553 | 230 | 158381449 | 5.58064  | 3.82933 | 1.24914  |   | ENSG00000155093:intron   | ENSG00000207637 | 158532717-158532813 | - | 151375  |
| 7 | 158405687 | 158406007 | 321 | 158405870 | 4.22261  | 3.26496 | 0.55558  |   | ENSG00000155093:intron   | ENSG00000207637 | 158532717-158532813 | - | 126966  |
| 7 | 158283619 | 158283839 | 221 | 158283669 | 3.64136  | 2.90822 | 0.30123  |   | ENSG00000155093:intron   | ENSG00000207637 | 158532717-158532813 | - | 249084  |
| 7 | 158381324 | 158381553 | 230 | 158381449 | 5.58064  | 3.82933 | 1.24914  |   | ENSG00000155093:intron   | ENSG00000207637 | 158532717-158532813 | - | 151375  |
| 7 | 158405687 | 158406007 | 321 | 158405870 | 4.22261  | 3.26496 | 0.55558  |   | ENSG00000155093:intron   | ENSG00000207637 | 158532717-158532813 | - | 126966  |
| 7 | 159246545 | 159246862 | 318 | 159246801 | 3.88967  | 3.0596  | 0.37913  |   | intergenic               | ENSG00000229435 | 159231434-159233377 | + | 15269   |
| 8 | 354285    | 354538    | 254 | 354476    | 5.39424  | 4.00432 | 1.09512  |   | intergenic               | ENSG00000249868 | 311132-331026       | - | -23385  |
| 8 | 574612    | 574884    | 273 | 574719    | 4.56295  | 3.60388 | 0.59373  |   | intergenic               | ENSG00000180190 | 489791-545781       | - | -28966  |
| 8 | 3575841   | 3576077   | 237 | 3575880   | 6.26578  | 4.40475 | 1.75945  |   | ENSG00000183117:intron   | ENSG00000222546 | 3700491-3700628     | + | -124532 |
| 8 | 3949552   | 3949825   | 274 | 3949647   | 3.03786  | 2.80302 | 0.15111  |   | ENSG00000183117:intron   | ENSG00000222546 | 3700491-3700628     | + | 249197  |
| 8 | 5815337   | 5815566   | 230 | 5815363   | 4.76929  | 3.60726 | 0.74587  |   | intergenic               | ENSG00000253571 | 5848696-5849692     | + | -33245  |
| 8 | 6109671   | 6109960   | 290 | 6109763   | 5.39424  | 4.00432 | 1.09512  |   | ENSG00000253880:intron   | ENSG00000253189 | 6036432-6036974     | - | -72841  |
| 8 | 9087893   | 9088179   | 287 | 9088015   | 8.92565  | 5.30243 | 4.07488  |   | ENSG00000104626:intron   | ENSG00000197334 | 9091239-9091508     | + | -3203   |
| 8 | 9101475   | 9101772   | 298 | 9101750   | 3.77589  | 3.20345 | 0.30123  |   | ENSG00000104626:intron   | ENSG00000197334 | 9091239-9091508     | + | 10384   |
| 8 | 9125331   | 9125570   | 240 | 9125425   | 5.68188  | 3.88989 | 1.31322  |   | intergenic               | ENSG00000254340 | 9141423-9145435     | + | -15973  |
| 8 | 10232664  | 10232881  | 218 | 10232672  | 3.77589  | 3.20345 | 0.30123  |   | ENSG00000175806:intron   | ENSG00000285606 | 10275498-10279737   | - | 46965   |
| 8 | 10248826  | 10249147  | 322 | 10248944  | 7.17425  | 4.80518 | 2.52654  |   | ENSG00000175806:intron   | ENSG00000285606 | 10275498-10279737   | - | 30751   |
| 8 | 13041502  | 13041774  | 273 | 13041530  | 4.1849   | 3.24157 | 0.52478  |   | intergenic               | ENSG00000206996 | 13044349-13044456   | + | -2711   |
| 8 | 14144980  | 14145356  | 377 | 14145068  | 4.56295  | 3.60388 | 0.59373  |   | ENSG00000185053:intron   | ENSG00000254575 | 14161296-14165359   | + | -16128  |
| 8 | 16478764  | 16479023  | 260 | 16478891  | 4.14216  | 3.33173 | 0.51073  |   | ENSG00000038945:intron   | ENSG00000038945 | 16107877-16567490   | - | 88597   |
| 8 | 17826784  | 17827143  | 360 | 17826987  | 4.919    | 3.70193 | 0.82412  |   | ENSG00000253944:intron   | ENSG00000253671 | 17808940-17820868   | + | 18023   |
| 8 | 19908763  | 19908986  | 224 | 19908794  | 3.32816  | 2.90812 | 0.30123  |   | ENSG00000175445:intron   | ENSG00000175445 | 19901716-19967259   | + | 7158    |
| 8 | 23439529  | 23439929  | 401 | 23439646  | 3.77589  | 3.20345 | 0.30123  |   | ENSG00000197217:intron   | ENSG00000134013 | 23297188-23425328   | - | -14400  |
| 8 | 25108574  | 25108905  | 332 | 25108663  | 4.1849   | 3.24157 | 0.52478  |   | intergenic               | ENSG00000253670 | 25141393-25141968   | - | 33229   |
| 8 | 27575272  | 27575498  | 227 | 27575405  | 4.81345  | 3.63515 | 0.77787  |   | ENSG00000234770:intron   | ENSG00000234770 | 27560273-27589073   | + | 15111   |

| ENSG00000120885:five_pri |          |          |     |          |          |         |          |                          |                 |                   |   |         |
|--------------------------|----------|----------|-----|----------|----------|---------|----------|--------------------------|-----------------|-------------------|---|---------|
| 8                        | 27614632 | 27614985 | 354 | 27614808 | 22.91595 | 7.35032 | 17.18397 | me_UTR;ENSG00000120885:e | ENSG00000120885 | 27596916-27615031 | - | 223     |
| xon                      |          |          |     |          |          |         |          |                          |                 |                   |   |         |
| 8                        | 28341163 | 28341411 | 249 | 28341303 | 9.02537  | 5.16418 | 4.14689  | ENSG00000168081:intron   | ENSG00000253690 | 28250062-28339255 | - | -2031   |
| 8                        | 29555275 | 29555592 | 318 | 29555419 | 9.34519  | 5.55289 | 4.42343  | ENSG00000253182:intron   | ENSG00000253182 | 29548170-29564341 | + | 7263    |
| 8                        | 29614624 | 29614846 | 223 | 29614775 | 7.34679  | 4.23292 | 2.66603  | intergenic               | ENSG00000243844 | 29632090-29632644 | + | -17355  |
| 8                        | 29665079 | 29665468 | 390 | 29665249 | 12.43382 | 5.82026 | 7.22732  | intergenic               | ENSG00000243844 | 29632090-29632644 | + | 33183   |
| 8                        | 29753432 | 29753723 | 292 | 29753541 | 9.85502  | 5.24413 | 4.88402  | ENSG00000253490:intron   | ENSG00000253490 | 29748308-29798492 | + | 5269    |
| 8                        | 30317525 | 30317756 | 232 | 30317552 | 5.78764  | 4.10443 | 1.39623  | intergenic               | ENSG00000253346 | 30331960-30332277 | - | 14637   |
| 8                        | 30655983 | 30656221 | 239 | 30656114 | 12.70978 | 6.39668 | 7.48239  | ENSG00000197265:intron   | ENSG00000197265 | 30578317-30658251 | - | 2149    |
| 8                        | 30880117 | 30880349 | 233 | 30880234 | 4.45692  | 3.17469 | 0.59373  | ENSG00000133863:intron   | ENSG00000133863 | 30831543-30913003 | - | 32770   |
| 8                        | 31100622 | 31100899 | 278 | 31100772 | 5.39424  | 4.00432 | 1.09512  | ENSG00000165392:intron   | ENSG00000253579 | 31131538-31131802 | - | 31042   |
| 8                        | 31107166 | 31107469 | 304 | 31107386 | 4.28127  | 3.42152 | 0.58762  | ENSG00000165392:intron   | ENSG00000253579 | 31131538-31131802 | - | 24485   |
| 8                        | 31100622 | 31100899 | 278 | 31100772 | 5.39424  | 4.00432 | 1.09512  | ENSG00000165392:intron   | ENSG00000253579 | 31131538-31131802 | - | 31042   |
| 8                        | 31107166 | 31107469 | 304 | 31107386 | 4.28127  | 3.42152 | 0.58762  | ENSG00000165392:intron   | ENSG00000253579 | 31131538-31131802 | - | 24485   |
| 8                        | 34906865 | 34907100 | 236 | 34906996 | 5.39424  | 4.00432 | 1.09512  | intergenic               | ENSG00000243181 | 34874158-34874633 | + | 32824   |
| 8                        | 35011691 | 35011948 | 258 | 35011876 | 4.07388  | 3.28775 | 0.47041  | intergenic               | ENSG00000243181 | 34874158-34874633 | + | 137661  |
| 8                        | 37144679 | 37144996 | 318 | 37144897 | 7.37304  | 4.74897 | 2.68538  | intergenic               | ENSG00000253650 | 37095149-37095390 | + | 49688   |
| 8                        | 37433510 | 37433907 | 398 | 37433884 | 4.56295  | 3.60388 | 0.59373  | intergenic               | ENSG00000253746 | 37405438-37406724 | - | -26984  |
| 8                        | 38658570 | 38658815 | 246 | 38658778 | 4.91514  | 3.56573 | 0.82412  | intergenic               | ENSG00000254321 | 38700625-38704855 | - | 46163   |
| 8                        | 39725292 | 39725582 | 291 | 39725387 | 3.77589  | 3.20345 | 0.30123  | ENSG00000168619:intron   | ENSG00000104755 | 39743734-39838289 | - | 112852  |
| 8                        | 42203361 | 42203597 | 237 | 42203547 | 5.2271   | 3.75666 | 1.05667  | ENSG00000104368:intron   | ENSG00000104368 | 42175232-42207724 | - | 4245    |
| 8                        | 42321522 | 42321788 | 267 | 42321599 | 4.82831  | 3.64454 | 0.77787  | ENSG00000104365:intron   | ENSG00000070501 | 42338453-42371808 | + | -16798  |
| 8                        | 42856971 | 42857231 | 261 | 42857077 | 7.25542  | 4.67748 | 2.59922  | ENSG00000120925:intron   | ENSG00000131931 | 42836673-42843325 | - | -13775  |
| 8                        | 46288688 | 46288929 | 242 | 46288818 | 6.26578  | 4.40475 | 1.75945  | intergenic               | ENSG00000276685 | 46028803-46028892 | - | -259916 |
| 8                        | 47954898 | 47955113 | 216 | 47955023 | 4.96535  | 3.7313  | 0.86205  | ENSG00000253729:intron   | ENSG00000253729 | 47773107-47960183 | - | 5178    |
| 8                        | 50271610 | 50271847 | 238 | 50271701 | 3.77589  | 3.20345 | 0.30123  | ENSG00000147481:intron   | ENSG00000253849 | 50381014-50382275 | + | -109286 |
| 8                        | 50294636 | 50294940 | 305 | 50294805 | 7.17425  | 4.80518 | 2.52654  | ENSG00000147481:intron   | ENSG00000253849 | 50381014-50382275 | + | -86226  |
| 8                        | 51869952 | 51870312 | 361 | 51870098 | 4.56295  | 3.60388 | 0.59373  | ENSG00000168300:intron   | ENSG00000253475 | 51895956-51896374 | + | 26242   |
| 8                        | 54663903 | 54664221 | 319 | 54664140 | 5.39424  | 4.00432 | 1.09512  | ENSG00000104237:intron   | ENSG00000253114 | 54696397-54697127 | + | -32335  |
| 8                        | 58446067 | 58446410 | 344 | 58446069 | 3.49438  | 2.91742 | 0.30123  | ENSG00000215114:intron   | ENSG00000250031 | 58424587-58426685 | - | -19553  |
| 8                        | 59339099 | 59339328 | 230 | 59339116 | 4.07388  | 3.28775 | 0.47041  | intergenic               | ENSG00000201763 | 59455884-59456010 | + | -116671 |
| 8                        | 59345698 | 59345906 | 209 | 59345896 | 3.77589  | 3.20345 | 0.30123  | intergenic               | ENSG00000201763 | 59455884-59456010 | + | -110082 |
| 8                        | 60051576 | 60051812 | 237 | 60051700 | 6.51641  | 4.07877 | 1.96373  | ENSG00000254775:intron   | ENSG00000254775 | 60049586-60074715 | + | 2107    |
| 8                        | 60780820 | 60781143 | 324 | 60780964 | 9.85502  | 5.24413 | 4.88402  | ENSG00000171316:intron   | ENSG00000254432 | 60808734-60809606 | - | 28625   |
| 8                        | 60848226 | 60848460 | 235 | 60848368 | 7.66756  | 4.92891 | 2.95201  | ENSG00000171316:intron   | ENSG00000254432 | 60808734-60809606 | - | -38736  |
| 8                        | 60780820 | 60781143 | 324 | 60780964 | 9.85502  | 5.24413 | 4.88402  | ENSG00000171316:intron   | ENSG00000254432 | 60808734-60809606 | - | 28625   |
| 8                        | 60848226 | 60848460 | 235 | 60848368 | 7.66756  | 4.92891 | 2.95201  | ENSG00000171316:intron   | ENSG00000254432 | 60808734-60809606 | - | -38736  |
| 8                        | 61399223 | 61399443 | 221 | 61399287 | 3.34993  | 2.92244 | 0.30123  | intergenic               | ENSG00000253711 | 61300163-61301069 | - | -98263  |
| 8                        | 62915376 | 62915837 | 462 | 62915670 | 4.56295  | 3.60388 | 0.59373  | ENSG00000185942:intron   | ENSG00000253431 | 62863081-62864181 | - | -51425  |
| 8                        | 63620247 | 63620495 | 249 | 63620396 | 4.07388  | 3.28775 | 0.47041  | intergenic               | ENSG00000252358 | 63609353-63609600 | - | -10770  |
| 8                        | 69475141 | 69475378 | 238 | 69475329 | 5.06016  | 3.79147 | 0.9304   | ENSG00000137573:intron   | ENSG00000137573 | 69466623-69660915 | + | 8636    |
| 8                        | 69536957 | 69537163 | 207 | 69537040 | 7.37304  | 4.74897 | 2.68538  | ENSG00000137573:intron   | ENSG00000137573 | 69466623-69660915 | + | 70436   |
| 8                        | 69678748 | 69678986 | 239 | 69678937 | 3.6499   | 2.91341 | 0.30123  | ENSG00000137571:intron   | ENSG00000222889 | 69700223-69700495 | + | -21356  |
| 8                        | 70013580 | 70013804 | 225 | 70013695 | 4.93185  | 3.44723 | 0.83372  | intergenic               | ENSG00000253721 | 69987414-69987697 | - | -25994  |
| 8                        | 70015437 | 70015669 | 233 | 70015551 | 9.06429  | 5.18652 | 4.17525  | intergenic               | ENSG00000253721 | 69987414-69987697 | - | -27855  |
| 8                        | 71253656 | 71253895 | 240 | 71253789 | 7.58982  | 3.93998 | 2.87738  | ENSG00000104313:intron   | ENSG00000254031 | 71155456-71204223 | + | 98319   |
| 8                        | 71263941 | 71264162 | 222 | 71264076 | 5.07624  | 3.80169 | 0.93914  | ENSG00000104313:intron   | ENSG00000254031 | 71155456-71204223 | + | 108595  |
| 8                        | 71253656 | 71253895 | 240 | 71253789 | 7.58982  | 3.93998 | 2.87738  | ENSG00000104313:intron   | ENSG00000254031 | 71155456-71204223 | + | 98319   |
| 8                        | 71263941 | 71264162 | 222 | 71264076 | 5.07624  | 3.80169 | 0.93914  | ENSG00000104313:intron   | ENSG00000254031 | 71155456-71204223 | + | 108595  |
| 8                        | 72000384 | 72000625 | 242 | 72000538 | 5.73591  | 4.07212 | 1.35894  | ENSG00000235531:intron   | ENSG00000104321 | 72019916-72075617 | - | 75113   |

|   |           |           |     |           |          |         |          |                                                     |                 |                     |   |         |
|---|-----------|-----------|-----|-----------|----------|---------|----------|-----------------------------------------------------|-----------------|---------------------|---|---------|
| 8 | 72080837  | 72081082  | 246 | 72080930  | 3.34993  | 2.92244 | 0.30123  | ENSG00000235531:intron                              | ENSG00000104321 | 72019916-72075617   | - | -5342   |
| 8 | 72102974  | 72103193  | 220 | 72103112  | 3.03786  | 2.80302 | 0.15111  | ENSG00000235531:intron                              | ENSG00000104321 | 72019916-72075617   | - | -27466  |
| 8 | 72823114  | 72823394  | 281 | 72823229  | 10.98447 | 6.32119 | 5.90745  | ENSG00000182674:intron                              | ENSG00000253784 | 72874858-72881740   | - | 58486   |
| 8 | 74131539  | 74132001  | 463 | 74131832  | 4.84177  | 3.65305 | 0.77787  | intergenic                                          | ENSG00000253115 | 74103515-74106744   | + | 28254   |
| 8 | 78348267  | 78348601  | 335 | 78348488  | 4.56295  | 3.60388 | 0.59373  | intergenic                                          | ENSG00000252935 | 78398514-78398622   | - | 50188   |
| 8 | 78386433  | 78386647  | 215 | 78386516  | 3.77589  | 3.20345 | 0.30123  | intergenic                                          | ENSG00000252935 | 78398514-78398622   | - | 12082   |
| 8 | 78387073  | 78387315  | 243 | 78387158  | 9.43096  | 5.20133 | 4.50508  | intergenic                                          | ENSG00000252935 | 78398514-78398622   | - | 11428   |
| 8 | 78348267  | 78348601  | 335 | 78348488  | 4.56295  | 3.60388 | 0.59373  | intergenic                                          | ENSG00000252935 | 78398514-78398622   | - | 50188   |
| 8 | 78386433  | 78386647  | 215 | 78386516  | 3.77589  | 3.20345 | 0.30123  | intergenic                                          | ENSG00000252935 | 78398514-78398622   | - | 12082   |
| 8 | 78387073  | 78387315  | 243 | 78387158  | 9.43096  | 5.20133 | 4.50508  | intergenic                                          | ENSG00000252935 | 78398514-78398622   | - | 11428   |
| 8 | 78548356  | 78548632  | 277 | 78548580  | 4.56295  | 3.60388 | 0.59373  | ENSG00000254266:intron;E<br>NSG00000171033:intron   | ENSG00000254266 | 78426102-78558503   | - | 10009   |
| 8 | 80957676  | 80958020  | 345 | 80957873  | 3.77589  | 3.20345 | 0.30123  | intergenic                                          | ENSG00000254060 | 81036963-81040831   | + | -79115  |
| 8 | 81025620  | 81025844  | 225 | 81025639  | 5.22474  | 3.89619 | 1.05478  | ENSG00000076641:intron                              | ENSG00000254060 | 81036963-81040831   | + | -11231  |
| 8 | 102653888 | 102654118 | 231 | 102653961 | 5.75051  | 3.78743 | 1.36222  | ENSG00000155090:intron                              | ENSG00000155090 | 102648778-102655902 | - | 1899    |
| 8 | 116649685 | 116650034 | 350 | 116649897 | 4.60755  | 3.1497  | 0.62762  | ENSG00000147677:intron                              | ENSG00000147679 | 116766502-116849463 | + | -116643 |
| 8 | 120567319 | 120567620 | 302 | 120567572 | 3.29424  | 2.88581 | 0.30123  | ENSG00000172164:intron                              | ENSG00000250290 | 120635557-120638204 | - | 70735   |
| 8 | 120586552 | 120586864 | 313 | 120586725 | 4.07388  | 3.28775 | 0.47041  | ENSG00000172164:intron                              | ENSG00000250290 | 120635557-120638204 | - | 51496   |
| 8 | 120567319 | 120567620 | 302 | 120567572 | 3.29424  | 2.88581 | 0.30123  | ENSG00000172164:intron                              | ENSG00000250290 | 120635557-120638204 | - | 70735   |
| 8 | 120586552 | 120586864 | 313 | 120586725 | 4.07388  | 3.28775 | 0.47041  | ENSG00000172164:intron                              | ENSG00000250290 | 120635557-120638204 | - | 51496   |
| 8 | 121909781 | 121909999 | 219 | 121909951 | 4.2388   | 3.39408 | 0.56297  | ENSG00000248690:intron                              | ENSG00000253814 | 122091479-122091609 | + | -181589 |
| 8 | 125110905 | 125111110 | 206 | 125111025 | 6.58155  | 3.96836 | 2.01637  | ENSG00000156831:intron                              | ENSG00000164961 | 125024259-125091840 | - | -19167  |
| 8 | 125130550 | 125130759 | 210 | 125130746 | 3.95865  | 3.21367 | 0.43404  | ENSG00000156831:intron                              | ENSG00000164961 | 125024259-125091840 | - | -38814  |
| 8 | 125151753 | 125151994 | 242 | 125151883 | 4.45692  | 3.17469 | 0.59373  | ENSG00000156831:intron                              | ENSG00000164961 | 125024259-125091840 | - | -60033  |
| 8 | 125352850 | 125353141 | 292 | 125352946 | 8.10122  | 4.81936 | 3.34921  | ENSG00000156831:intron;E<br>NSG00000254431:Promoter | ENSG00000254431 | 125348195-125351416 | - | -1579   |
| 8 | 125360324 | 125360564 | 241 | 125360420 | 4.813    | 3.37843 | 0.77787  | ENSG00000156831:intron                              | ENSG00000254431 | 125348195-125351416 | - | -9027   |
| 8 | 125352850 | 125353141 | 292 | 125352946 | 8.10122  | 4.81936 | 3.34921  | ENSG00000156831:intron;E<br>NSG00000254431:Promoter | ENSG00000254431 | 125348195-125351416 | - | -1579   |
| 8 | 125360324 | 125360564 | 241 | 125360420 | 4.813    | 3.37843 | 0.77787  | ENSG00000156831:intron                              | ENSG00000254431 | 125348195-125351416 | - | -9027   |
| 8 | 125637561 | 125637803 | 243 | 125637671 | 11.78444 | 5.68533 | 6.63496  | intergenic                                          | ENSG00000253470 | 125749054-125750241 | - | 112559  |
| 8 | 125644469 | 125644765 | 297 | 125644605 | 11.53275 | 5.55571 | 6.4016   | intergenic                                          | ENSG00000253470 | 125749054-125750241 | - | 105624  |
| 8 | 125698793 | 125699118 | 326 | 125698937 | 16.28881 | 7.39114 | 10.81485 | intergenic                                          | ENSG00000253470 | 125749054-125750241 | - | 51286   |
| 8 | 125769228 | 125769635 | 408 | 125769274 | 3.02441  | 2.62206 | 0.15111  | intergenic                                          | ENSG00000253470 | 125749054-125750241 | - | -19190  |
| 8 | 125637561 | 125637803 | 243 | 125637671 | 11.78444 | 5.68533 | 6.63496  | intergenic                                          | ENSG00000253470 | 125749054-125750241 | - | 112559  |
| 8 | 125644469 | 125644765 | 297 | 125644605 | 11.53275 | 5.55571 | 6.4016   | intergenic                                          | ENSG00000253470 | 125749054-125750241 | - | 105624  |
| 8 | 125698793 | 125699118 | 326 | 125698937 | 16.28881 | 7.39114 | 10.81485 | intergenic                                          | ENSG00000253470 | 125749054-125750241 | - | 51286   |
| 8 | 125769228 | 125769635 | 408 | 125769274 | 3.02441  | 2.62206 | 0.15111  | intergenic                                          | ENSG00000253470 | 125749054-125750241 | - | -19190  |
| 8 | 125637561 | 125637803 | 243 | 125637671 | 11.78444 | 5.68533 | 6.63496  | intergenic                                          | ENSG00000253470 | 125749054-125750241 | - | 112559  |
| 8 | 125644469 | 125644765 | 297 | 125644605 | 11.53275 | 5.55571 | 6.4016   | intergenic                                          | ENSG00000253470 | 125749054-125750241 | - | 105624  |
| 8 | 125698793 | 125699118 | 326 | 125698937 | 16.28881 | 7.39114 | 10.81485 | intergenic                                          | ENSG00000253470 | 125749054-125750241 | - | 51286   |
| 8 | 125769228 | 125769635 | 408 | 125769274 | 3.02441  | 2.62206 | 0.15111  | intergenic                                          | ENSG00000253470 | 125749054-125750241 | - | -19190  |
| 8 | 125637561 | 125637803 | 243 | 125637671 | 11.78444 | 5.68533 | 6.63496  | intergenic                                          | ENSG00000253470 | 125749054-125750241 | - | 112559  |
| 8 | 125644469 | 125644765 | 297 | 125644605 | 11.53275 | 5.55571 | 6.4016   | intergenic                                          | ENSG00000253470 | 125749054-125750241 | - | 105624  |
| 8 | 125698793 | 125699118 | 326 | 125698937 | 16.28881 | 7.39114 | 10.81485 | intergenic                                          | ENSG00000253470 | 125749054-125750241 | - | 51286   |
| 8 | 125769228 | 125769635 | 408 | 125769274 | 3.02441  | 2.62206 | 0.15111  | intergenic                                          | ENSG00000253470 | 125749054-125750241 | - | -19190  |
| 8 | 125942245 | 125942505 | 261 | 125942339 | 5.74381  | 3.92704 | 1.36222  | ENSG00000245164:intron                              | ENSG00000245164 | 125922307-125951249 | - | 8874    |
| 8 | 126006616 | 126006892 | 277 | 126006653 | 4.1849   | 3.24157 | 0.52478  | intergenic                                          | ENSG00000254227 | 125998993-126001001 | - | -5752   |
| 8 | 126966190 | 126966545 | 356 | 126966408 | 4.30996  | 3.44006 | 0.59373  | ENSG00000253438:intron                              | ENSG00000282961 | 127079873-127092600 | + | -113506 |
| 8 | 127970996 | 127971270 | 275 | 127971173 | 5.89863  | 4.02031 | 1.48878  | ENSG00000249859:intron                              | ENSG00000221771 | 127960632-127960695 | + | 10500   |
| 8 | 128222012 | 128222226 | 215 | 128222129 | 3.73002  | 2.77027 | 0.30123  | intergenic                                          | ENSG00000201782 | 128220503-128220803 | + | 1615    |

|   |           |           |     |           |          |         |          |                                                     |                 |                     |   |         |
|---|-----------|-----------|-----|-----------|----------|---------|----------|-----------------------------------------------------|-----------------|---------------------|---|---------|
| 8 | 128240405 | 128240739 | 335 | 128240549 | 15.24834 | 6.61394 | 9.82777  | intergenic                                          | ENSG00000201782 | 128220503-128220803 | + | 20068   |
| 8 | 128657428 | 128657738 | 311 | 128657580 | 9.85502  | 5.24413 | 4.88402  | intergenic                                          | ENSG00000254275 | 128405268-128564679 | - | -92903  |
| 8 | 128824485 | 128824688 | 204 | 128824495 | 3.23478  | 2.75364 | 0.28314  | intergenic                                          | ENSG00000254275 | 128405268-128564679 | - | -259907 |
| 8 | 128903842 | 128904052 | 211 | 128903976 | 4.65453  | 3.53495 | 0.66139  | intergenic                                          | ENSG00000254275 | 128405268-128564679 | - | -339267 |
| 8 | 129048609 | 129048846 | 238 | 129048711 | 6.49439  | 4.38367 | 1.95029  | ENSG00000229140:intron                              | ENSG00000253225 | 129250966-129251138 | + | -202239 |
| 8 | 129206203 | 129206482 | 280 | 129206349 | 4.99664  | 3.75114 | 0.88739  | ENSG00000229140:intron                              | ENSG00000253225 | 129250966-129251138 | + | -44624  |
| 8 | 130174493 | 130174740 | 248 | 130174622 | 7.07338  | 4.39791 | 2.45329  | ENSG00000153317:intron                              | ENSG00000212342 | 130162971-130163127 | + | 11645   |
| 8 | 130444688 | 130444937 | 250 | 130444815 | 7.53075  | 4.33168 | 2.82489  | ENSG00000153317:Promoter                            | ENSG00000153317 | 130052103-130443660 | - | -1152   |
| 8 | 131366491 | 131366707 | 217 | 131366654 | 6.03946  | 4.26226 | 1.60751  | intergenic                                          | ENSG00000253507 | 131308544-131317632 | + | 58054   |
| 8 | 131846599 | 131847277 | 679 | 131846975 | 3.49438  | 2.91742 | 0.30123  | intergenic                                          | ENSG00000132294 | 131904087-132013642 | + | -57149  |
| 8 | 132276470 | 132276713 | 244 | 132276580 | 9.33092  | 5.14553 | 4.41089  | ENSG00000184156:intron                              | ENSG00000132297 | 132061485-132111159 | - | -165432 |
| 8 | 133730906 | 133731211 | 306 | 133731027 | 4.18632  | 3.24245 | 0.52565  | intergenic                                          | ENSG00000253970 | 133754810-133755450 | + | -23752  |
| 8 | 134946096 | 134946334 | 239 | 134946176 | 4.72575  | 3.5798  | 0.71873  | intergenic                                          | ENSG00000244413 | 134978826-134979279 | - | 33064   |
| 8 | 135069474 | 135069701 | 228 | 135069632 | 4.55072  | 3.59595 | 0.59373  | intergenic                                          | ENSG00000244413 | 134978826-134979279 | - | -90308  |
| 8 | 135574783 | 135575065 | 283 | 135574904 | 4.11517  | 3.31434 | 0.49781  | ENSG00000131773:intron                              | ENSG00000253915 | 135625184-135625981 | - | 51057   |
| 8 | 136248494 | 136248700 | 207 | 136248646 | 4.47684  | 3.42343 | 0.59373  | intergenic                                          | ENSG00000285683 | 136237385-136241532 | - | -7064   |
| 8 | 136333637 | 136333924 | 288 | 136333731 | 7.38831  | 4.58155 | 2.69775  | intergenic                                          | ENSG00000285683 | 136237385-136241532 | - | -92248  |
| 8 | 138210105 | 138210440 | 336 | 138210238 | 5.96569  | 4.21594 | 1.54281  | ENSG00000147724:intron                              | ENSG00000253288 | 137809443-138083570 | - | -126702 |
| 8 | 138402658 | 138402918 | 261 | 138402843 | 4.91514  | 3.56573 | 0.82412  | ENSG00000147724:intron                              | ENSG00000147724 | 138130022-138496822 | - | 94034   |
| 8 | 138453792 | 138453999 | 208 | 138453947 | 4.56295  | 3.60388 | 0.59373  | ENSG00000147724:intron                              | ENSG00000147724 | 138130022-138496822 | - | 42927   |
| 8 | 139021888 | 139022148 | 261 | 139022035 | 5.48809  | 3.9179  | 1.17181  | intergenic                                          | ENSG00000253432 | 139096304-139102830 | - | 80812   |
| 8 | 140591427 | 140591688 | 262 | 140591615 | 5.65806  | 3.7345  | 1.30082  | ENSG00000123908:intron;E<br>NSG00000280326:Promoter | ENSG00000280326 | 140591683-140593201 | + | -126    |
| 8 | 143110727 | 143111200 | 474 | 143110778 | 4.06198  | 3.28009 | 0.47041  | intergenic                                          | ENSG00000261667 | 143080456-143083001 | + | 30507   |
| 8 | 143936480 | 143936730 | 251 | 143936596 | 15.01379 | 5.73717 | 9.61104  | ENSG00000178209:intron                              | ENSG00000207574 | 143945190-143945279 | + | 8674    |
| 9 | 2305651   | 2306237   | 587 | 2305818   | 4.56295  | 3.60388 | 0.59373  | intergenic                                          | ENSG00000264615 | 2228960-2229241     | - | -76702  |
| 9 | 4121802   | 4122046   | 245 | 4121963   | 5.6497   | 4.01836 | 1.29426  | ENSG00000107249:intron                              | ENSG00000230001 | 4070905-4071884     | - | -50039  |
| 9 | 4153329   | 4153606   | 278 | 4153467   | 3.49438  | 2.91742 | 0.30123  | ENSG00000107249:intron                              | ENSG00000230001 | 4070905-4071884     | - | -81583  |
| 9 | 5768501   | 5768737   | 237 | 5768553   | 8.134    | 4.66145 | 3.3598   | ENSG00000107036:intron;E<br>NSG00000099219:intron   | ENSG00000225408 | 5719020-5720244     | - | -48374  |
| 9 | 7727110   | 7727435   | 326 | 7727298   | 3.6499   | 2.91341 | 0.30123  | intergenic                                          | ENSG00000273056 | 7786104-7786688     | - | 59416   |
| 9 | 7756098   | 7756305   | 208 | 7756295   | 3.37418  | 2.93841 | 0.30123  | intergenic                                          | ENSG00000273056 | 7786104-7786688     | - | 30487   |
| 9 | 11757689  | 11757951  | 263 | 11757782  | 4.56295  | 3.60388 | 0.59373  | ENSG00000285784:intron                              | ENSG00000275130 | 11618495-11618621   | - | -139198 |
| 9 | 30075543  | 30075913  | 371 | 30075743  | 14.37081 | 7.6082  | 9.00841  | intergenic                                          | ENSG00000230097 | 29824741-29826711   | - | -249016 |
| 9 | 33988497  | 33988782  | 286 | 33988613  | 10.79066 | 5.97945 | 5.72727  | ENSG00000137073:intron                              | ENSG00000226801 | 33968070-33968518   | - | -20121  |
| 9 | 37409287  | 37409649  | 363 | 37409480  | 24.61963 | 9.03149 | 18.83339 | intergenic                                          | ENSG00000137106 | 37422665-37436990   | + | -13197  |
| 9 | 37596983  | 37597323  | 341 | 37597145  | 4.87332  | 3.67301 | 0.80353  | ENSG00000255872:intron                              | ENSG00000175768 | 37582645-37592642   | - | -4510   |
| 9 | 37804992  | 37805257  | 266 | 37805046  | 4.5035   | 3.44013 | 0.59373  | ENSG00000255872:intron;E<br>NSG00000122741:intron   | ENSG00000107371 | 37766977-37801437   | - | -3687   |
| 9 | 41220450  | 41220763  | 314 | 41220622  | 3.9797   | 2.90741 | 0.44999  | intergenic                                          | ENSG00000276029 | 41233754-41233835   | + | -13148  |
| 9 | 41303305  | 41303707  | 403 | 41303376  | 4.84177  | 3.65305 | 0.77787  | intergenic                                          | ENSG00000274680 | 41292886-41294125   | + | 10619   |
| 9 | 41303305  | 41303707  | 403 | 41303376  | 4.84177  | 3.65305 | 0.77787  | intergenic                                          | ENSG00000274680 | 41292886-41294125   | + | 10619   |
| 9 | 63821321  | 63821554  | 234 | 63821417  | 5.80381  | 3.06316 | 1.41073  | intergenic                                          | ENSG00000266017 | 63819573-63819654   | + | 1864    |
| 9 | 69346842  | 69347057  | 216 | 69346939  | 4.31475  | 3.20475 | 0.59373  | ENSG00000135063:intron                              | ENSG00000135063 | 69324566-69392558   | + | 22383   |
| 9 | 71814349  | 71814555  | 207 | 71814513  | 3.18471  | 2.81386 | 0.2494   | intergenic                                          | ENSG00000135048 | 71683365-71816690   | - | 2238    |
| 9 | 71858780  | 71859084  | 305 | 71858898  | 6.26578  | 4.40475 | 1.75945  | intergenic                                          | ENSG00000135048 | 71683365-71816690   | - | -42241  |
| 9 | 72294561  | 72295028  | 468 | 72294850  | 4.56295  | 3.60388 | 0.59373  | intergenic                                          | ENSG00000252428 | 72299719-72299838   | - | 5044    |
| 9 | 72889099  | 72889368  | 270 | 72889275  | 6.49439  | 4.38367 | 1.95029  | intergenic                                          | ENSG00000236849 | 72871727-72874109   | - | -15124  |
| 9 | 73149496  | 73149784  | 289 | 73149666  | 9.09099  | 5.60604 | 4.18865  | intergenic                                          | ENSG00000135046 | 73151756-73170393   | + | -2116   |
| 9 | 73279360  | 73279569  | 210 | 73279528  | 3.77589  | 3.20345 | 0.30123  | intergenic                                          | ENSG00000135046 | 73151756-73170393   | + | 127708  |
| 9 | 73716752  | 73716986  | 235 | 73716865  | 6.49439  | 4.38367 | 1.95029  | intergenic                                          | ENSG00000212454 | 73750971-73751077   | - | 34208   |

|   |           |           |     |           |          |         |          |                          |                 |                     |   |         |
|---|-----------|-----------|-----|-----------|----------|---------|----------|--------------------------|-----------------|---------------------|---|---------|
| 9 | 73772767  | 73773002  | 236 | 73772827  | 4.56295  | 3.60388 | 0.59373  | intergenic               | ENSG00000212454 | 73750971-73751077   | - | -21807  |
| 9 | 73785612  | 73786013  | 402 | 73785844  | 3.34993  | 2.92244 | 0.30123  | intergenic               | ENSG00000212454 | 73750971-73751077   | - | -34735  |
| 9 | 75175743  | 75176009  | 267 | 75175903  | 6.49439  | 4.38367 | 1.95029  | intergenic               | ENSG00000200041 | 75181519-75181621   | - | 5745    |
| 9 | 76596244  | 76596478  | 235 | 76596357  | 6.49439  | 4.38367 | 1.95029  | ENSG00000187210:intron   | ENSG00000219149 | 76549281-76549771   | - | -46589  |
| 9 | 77273556  | 77273779  | 224 | 77273716  | 5.34519  | 3.973   | 1.09512  | ENSG00000197969:intron   | ENSG00000232998 | 77176759-77178180   | - | -95487  |
| 9 | 78464564  | 78464881  | 318 | 78464829  | 4.42776  | 3.51628 | 0.59373  | intergenic               | ENSG00000270627 | 78589157-78589539   | + | -124435 |
| 9 | 78560636  | 78561006  | 371 | 78560792  | 3.03786  | 2.80302 | 0.15111  | intergenic               | ENSG00000270627 | 78589157-78589539   | + | -28336  |
| 9 | 78570667  | 78570874  | 208 | 78570737  | 3.03786  | 2.80302 | 0.15111  | intergenic               | ENSG00000270627 | 78589157-78589539   | + | -18387  |
| 9 | 78636480  | 78636783  | 304 | 78636627  | 4.56295  | 3.60388 | 0.59373  | intergenic               | ENSG00000270627 | 78589157-78589539   | + | 47474   |
| 9 | 88589557  | 88589869  | 313 | 88589681  | 3.56683  | 2.68164 | 0.30123  | intergenic               | ENSG00000130045 | 88534032-88584274   | + | 55680   |
| 9 | 94107189  | 94107490  | 302 | 94107284  | 4.56295  | 3.60388 | 0.59373  | ENSG00000158079:intron   | ENSG00000269946 | 94166288-94200627   | + | -58949  |
| 9 | 94698039  | 94698354  | 316 | 94698088  | 4.458    | 3.53587 | 0.59373  | intergenic               | ENSG00000148120 | 94726700-95087218   | + | -28504  |
| 9 | 94702455  | 94702661  | 207 | 94702551  | 5.27581  | 3.92874 | 1.08581  | intergenic               | ENSG00000148120 | 94726700-95087218   | + | -24142  |
| 9 | 95028237  | 95028588  | 352 | 95028426  | 5.14139  | 3.84312 | 0.98688  | ENSG00000148120:intron   | ENSG00000274115 | 95065349-95065446   | + | -36937  |
| 9 | 97704124  | 97704416  | 293 | 97704210  | 3.49438  | 2.91742 | 0.30123  | ENSG00000236130:intron   | ENSG00000214417 | 97698921-97700734   | + | 5348    |
| 9 | 99927149  | 99927442  | 294 | 99927189  | 4.56295  | 3.60388 | 0.59373  | ENSG00000254571:intron;E | ENSG00000254571 | 99915076-99929896   | - | 2601    |
| 9 | 103150239 | 103150537 | 299 | 103150458 | 4.56295  | 3.60388 | 0.59373  | NSG00000136874:intron    | ENSG00000229830 | 103065415-103065598 | + | 84972   |
| 9 | 104961288 | 104961562 | 275 | 104961415 | 12.53113 | 6.77006 | 7.32038  | ENSG00000225564:intron   | ENSG00000230013 | 104990795-104991781 | - | 30356   |
| 9 | 106463832 | 106464062 | 231 | 106464015 | 4.44284  | 3.52605 | 0.59373  | intergenic               | ENSG00000230013 | 104990795-104991781 | - | 30356   |
| 9 | 108906918 | 108907209 | 292 | 108907107 | 5.6497   | 4.01836 | 1.29426  | ENSG00000234323:intron   | ENSG00000229297 | 106584141-106591952 | - | 128005  |
| 9 | 110808745 | 110809003 | 259 | 110808883 | 8.134    | 4.66145 | 3.3598   | ENSG00000070061:intron   | ENSG00000070061 | 108867516-108934116 | - | 27053   |
| 9 | 112696997 | 112697247 | 251 | 112697187 | 3.49438  | 2.91742 | 0.30123  | intergenic               | ENSG00000223918 | 110727455-110727679 | - | -81194  |
| 9 | 112721768 | 112721976 | 209 | 112721888 | 3.67095  | 3.02962 | 0.30123  | ENSG00000148153:intron   | ENSG00000148153 | 112683925-112718236 | - | 21114   |
| 9 | 113311115 | 113311413 | 299 | 113311157 | 3.02441  | 2.62206 | 0.15111  | intergenic               | ENSG00000148153 | 112683925-112718236 | - | -3635   |
| 9 | 113579001 | 113579251 | 251 | 113579180 | 8.60945  | 4.92743 | 3.78062  | intergenic               | ENSG00000165188 | 113297092-113303376 | - | -7887   |
| 9 | 114267662 | 114268104 | 443 | 114267823 | 4.84177  | 3.65305 | 0.77787  | ENSG00000237073:intron;E | ENSG00000237073 | 113570189-113590019 | - | 10893   |
| 9 | 114385454 | 114385776 | 323 | 114385626 | 9.34358  | 4.96849 | 4.42228  | NSG00000138835:intron    | ENSG00000229314 | 114323055-114326475 | + | -55172  |
| 9 | 114447444 | 114447662 | 219 | 114447641 | 4.76929  | 3.60726 | 0.74587  | ENSG00000196739:intron   | ENSG00000229314 | 114323055-114326475 | + | -55172  |
| 9 | 114485006 | 114485347 | 342 | 114485161 | 15.75907 | 7.35618 | 10.3066  | ENSG00000106948:intron   | ENSG00000106948 | 114334155-114394405 | - | 8790    |
| 9 | 114447444 | 114447662 | 219 | 114447641 | 4.76929  | 3.60726 | 0.74587  | ENSG00000095397:intron   | ENSG00000271214 | 114491563-114491741 | + | -44010  |
| 9 | 114485006 | 114485347 | 342 | 114485161 | 15.75907 | 7.35618 | 10.3066  | ENSG00000095397:intron   | ENSG00000271214 | 114491563-114491741 | + | -6387   |
| 9 | 114696876 | 114697465 | 590 | 114697336 | 7.37304  | 4.74897 | 2.68538  | ENSG00000095397:intron   | ENSG00000271214 | 114491563-114491741 | + | -44010  |
| 9 | 114696876 | 114697465 | 590 | 114697336 | 7.37304  | 4.74897 | 2.68538  | ENSG00000095397:intron   | ENSG00000271214 | 114491563-114491741 | + | -6387   |
| 9 | 118723312 | 118723542 | 231 | 118723518 | 5.39424  | 4.00432 | 1.09512  | ENSG00000230284:Promoter | ENSG00000230284 | 114695921-114696315 | - | -855    |
| 9 | 120173232 | 120173451 | 220 | 120173357 | 7.91183  | 5.07907 | 3.17539  | ENSG00000230284:Promoter | ENSG00000230284 | 114695921-114696315 | - | -855    |
| 9 | 120404878 | 120405084 | 207 | 120404951 | 3.02441  | 2.62206 | 0.15111  | intergenic               | ENSG00000235201 | 118740562-118745312 | + | -17135  |
| 9 | 120584099 | 120584351 | 253 | 120584200 | 9.65073  | 4.95373 | 4.71281  | intergenic               | ENSG00000207814 | 120244978-120245050 | - | 71709   |
| 9 | 120892748 | 120892998 | 251 | 120892861 | 7.36237  | 4.39861 | 2.67971  | ENSG00000136861:intron   | ENSG00000207814 | 120244978-120245050 | - | -159930 |
| 9 | 123284920 | 123285168 | 249 | 123284965 | 4.15576  | 3.3405  | 0.52015  | intergenic               | ENSG00000136861 | 120388868-120580170 | - | -4054   |
| 9 | 124218754 | 124219016 | 263 | 124218876 | 9.77126  | 4.84568 | 4.82479  | ENSG00000119403:intron   | ENSG00000119403 | 120855651-120894896 | - | 2023    |
| 9 | 125478485 | 125478785 | 301 | 125478592 | 6.17229  | 4.34582 | 1.71923  | intergenic               | ENSG00000165209 | 123109499-123268576 | - | -16467  |
| 9 | 125707751 | 125708043 | 293 | 125707776 | 4.32165  | 3.32656 | 0.59373  | intergenic               | ENSG00000119408 | 124257605-124353307 | + | -38720  |
| 9 | 127005413 | 127005659 | 247 | 127005516 | 6.00061  | 3.79022 | 1.57469  | ENSG00000119487:intron   | ENSG00000243845 | 125512901-125513207 | - | 34572   |
| 9 | 129053718 | 129054115 | 398 | 129053992 | 3.3168   | 2.90065 | 0.30123  | ENSG00000119487:Promoter | ENSG00000119487 | 125437392-125707234 | - | -662    |
| 9 | 131622096 | 131622330 | 235 | 131622286 | 4.84177  | 3.65305 | 0.77787  | ENSG00000136828:intron   | ENSG00000136828 | 126914773-127223166 | + | 90762   |
| 9 | 133225653 | 133225896 | 244 | 133225810 | 3.63193  | 3.10837 | 0.30123  | ENSG00000148343:intron   | ENSG00000148343 | 129036620-129072082 | + | 17296   |
| 9 | 136882569 | 136882916 | 348 | 136882719 | 25.82664 | 9.62988 | 19.99835 | ENSG00000107263:intron   | ENSG00000283526 | 131545513-131558620 | + | 76699   |
| X | 2155320   | 2155706   | 387 | 2155587   | 5.39424  | 4.00432 | 1.09512  | ENSG00000119440:intron   | ENSG00000119440 | 133224904-133228591 | - | 2817    |
|   |           |           |     |           |          |         |          | intergenic               | ENSG00000127191 | 136881911-136926607 | + | 831     |
|   |           |           |     |           |          |         |          | intergenic               | ENSG00000223571 | 2334294-2336410     | - | 180897  |

|   |           |           |     |           |          |         |          |                          |                 |                     |   |         |
|---|-----------|-----------|-----|-----------|----------|---------|----------|--------------------------|-----------------|---------------------|---|---------|
| X | 2855459   | 2855726   | 268 | 2855666   | 5.39424  | 4.00432 | 1.09512  | ENSG00000235483:Promoter | ENSG00000235483 | 2852739-2853760     | - | -1832   |
| X | 9829601   | 9829876   | 276 | 9829711   | 9.09099  | 5.60604 | 4.18865  | :ENSG00000056998:intron  | ENSG00000215319 | 9818238-9819469     | - | -10269  |
| X | 13653051  | 13653317  | 267 | 13653128  | 6.89723  | 4.46128 | 2.29209  | intergenic               | ENSG00000176896 | 13653188-13681964   | + | -4      |
| X | 16958520  | 16958785  | 266 | 16958678  | 4.07388  | 3.28775 | 0.47041  | ENSG00000169891:intron   | ENSG00000169891 | 16946690-17153280   | + | 11962   |
| X | 17773784  | 17773999  | 216 | 17773906  | 4.00982  | 3.24654 | 0.45978  | intergenic               | ENSG00000227873 | 17769004-17769398   | - | -4493   |
| X | 19431570  | 19431792  | 223 | 19431644  | 3.77589  | 3.20345 | 0.30123  | ENSG00000180815:intron   | ENSG00000202144 | 19376773-19376875   | + | 54907   |
| X | 19839867  | 19840106  | 240 | 19839943  | 4.1849   | 3.24157 | 0.52478  | ENSG00000147010:intron   | ENSG00000147010 | 19533974-19887601   | - | 47615   |
| X | 19847090  | 19847441  | 352 | 19847145  | 4.56295  | 3.60388 | 0.59373  | ENSG00000147010:intron   | ENSG00000147010 | 19533974-19887601   | - | 40336   |
| X | 20516226  | 20516549  | 324 | 20516340  | 7.37304  | 4.74897 | 2.68538  | intergenic               | ENSG00000252978 | 20452107-20452431   | + | 64280   |
| X | 21926849  | 21927188  | 340 | 21926974  | 10.09471 | 6.00647 | 5.09428  | intergenic               | ENSG00000271286 | 21939460-21940160   | + | -12442  |
| X | 29443797  | 29444230  | 434 | 29443924  | 3.34993  | 2.92244 | 0.30123  | ENSG00000169306:intron   | ENSG00000227393 | 29369000-29369845   | - | -74168  |
| X | 39855781  | 39856038  | 258 | 39855863  | 6.26578  | 4.40475 | 1.75945  | intergenic               | ENSG00000261435 | 39837535-39848358   | - | -7551   |
| X | 45758895  | 45759352  | 458 | 45759220  | 7.17425  | 4.80518 | 2.52654  | ENSG00000270069:intron   | ENSG00000269902 | 45764771-45765299   | + | 6176    |
| X | 49079865  | 49080087  | 223 | 49079948  | 7.87837  | 4.69115 | 3.14537  | ENSG00000196998:intron   | ENSG00000206936 | 49082027-49082165   | - | -2051   |
| X | 65596316  | 65596633  | 318 | 65596475  | 16.31852 | 7.93598 | 10.84035 | ENSG00000147065:intron   | ENSG00000147065 | 65588376-65741931   | + | 8098    |
| X | 71628060  | 71628514  | 455 | 71628132  | 4.07388  | 3.28775 | 0.47041  | intergenic               | ENSG00000186810 | 71615915-71618517   | - | -9769   |
| X | 72018511  | 72018736  | 226 | 72018646  | 7.49188  | 4.02246 | 2.78905  | ENSG00000204131:intron   | ENSG00000196933 | 72044544-72044892   | + | -25921  |
| X | 78065036  | 78065340  | 305 | 78065155  | 8.00408  | 5.13597 | 3.2614   | ENSG00000102144:intron   | ENSG00000187325 | 78129747-78139706   | - | 74518   |
| X | 94499331  | 94499583  | 253 | 94499470  | 5.36277  | 3.98422 | 1.09512  | intergenic               | ENSG00000232293 | 94636662-94639570   | - | 140113  |
| X | 95814678  | 95814892  | 215 | 95814754  | 3.77589  | 3.20345 | 0.30123  | intergenic               | ENSG00000270583 | 95720242-95721144   | + | 94542   |
| X | 95827263  | 95827598  | 336 | 95827543  | 4.07388  | 3.28775 | 0.47041  | intergenic               | ENSG00000270583 | 95720242-95721144   | + | 107188  |
| X | 108159099 | 108159315 | 217 | 108159110 | 4.08844  | 3.29712 | 0.48089  | ENSG00000197565:intron   | ENSG00000101844 | 108091667-108154671 | + | 67539   |
| X | 109271029 | 109271356 | 328 | 109271207 | 4.91514  | 3.56573 | 0.82412  | intergenic               | ENSG00000215000 | 109341812-109342697 | + | -70620  |
| X | 112225677 | 112225962 | 286 | 112225826 | 4.84177  | 3.65305 | 0.77787  | intergenic               | ENSG00000271464 | 112319951-112320417 | - | 94598   |
| X | 112276336 | 112276718 | 383 | 112276413 | 4.07388  | 3.28775 | 0.47041  | intergenic               | ENSG00000271464 | 112319951-112320417 | - | 43890   |
| X | 116797134 | 116797386 | 253 | 116797276 | 4.56295  | 3.60388 | 0.59373  | intergenic               | ENSG00000224217 | 116748529-116748877 | - | -48382  |
| X | 118664862 | 118665202 | 341 | 118665000 | 3.77589  | 3.20345 | 0.30123  | ENSG00000147251:intron   | ENSG00000230399 | 118632374-118634218 | - | -30813  |
| X | 118678615 | 118678929 | 315 | 118678907 | 3.34993  | 2.92244 | 0.30123  | ENSG00000147251:intron   | ENSG00000230399 | 118632374-118634218 | - | -44553  |
| X | 118679658 | 118679968 | 311 | 118679805 | 4.56295  | 3.60388 | 0.59373  | ENSG00000147251:intron   | ENSG00000230399 | 118632374-118634218 | - | -45594  |
| X | 118664862 | 118665202 | 341 | 118665000 | 3.77589  | 3.20345 | 0.30123  | ENSG00000147251:intron   | ENSG00000230399 | 118632374-118634218 | - | -30813  |
| X | 118678615 | 118678929 | 315 | 118678907 | 3.34993  | 2.92244 | 0.30123  | ENSG00000147251:intron   | ENSG00000230399 | 118632374-118634218 | - | -44553  |
| X | 118679658 | 118679968 | 311 | 118679805 | 4.56295  | 3.60388 | 0.59373  | ENSG00000147251:intron   | ENSG00000230399 | 118632374-118634218 | - | -45594  |
| X | 118664862 | 118665202 | 341 | 118665000 | 3.77589  | 3.20345 | 0.30123  | ENSG00000147251:intron   | ENSG00000230399 | 118632374-118634218 | - | -30813  |
| X | 118678615 | 118678929 | 315 | 118678907 | 3.34993  | 2.92244 | 0.30123  | ENSG00000147251:intron   | ENSG00000230399 | 118632374-118634218 | - | -44553  |
| X | 118679658 | 118679968 | 311 | 118679805 | 4.56295  | 3.60388 | 0.59373  | ENSG00000147251:intron   | ENSG00000230399 | 118632374-118634218 | - | -45594  |
| X | 119514744 | 119515043 | 300 | 119514778 | 5.92936  | 4.19316 | 1.51421  | intergenic               | ENSG00000224281 | 119466033-119469098 | - | -45795  |
| X | 120401736 | 120401985 | 250 | 120401829 | 4.56295  | 3.60388 | 0.59373  | intergenic               | ENSG00000101892 | 120362084-120383249 | + | 39776   |
| X | 122783326 | 122783618 | 293 | 122783361 | 4.84177  | 3.65305 | 0.77787  | intergenic               | ENSG00000212321 | 122840425-122840645 | + | -56953  |
| X | 124064087 | 124064314 | 228 | 124064190 | 4.56295  | 3.60388 | 0.59373  | ENSG00000101972:intron   | ENSG00000232412 | 123959232-123961341 | - | -102859 |
| X | 124169184 | 124169409 | 226 | 124169286 | 5.15789  | 3.85362 | 1.00126  | ENSG00000101972:intron   | ENSG00000237426 | 124173000-124174459 | - | 5163    |
| X | 135532029 | 135532318 | 290 | 135532137 | 6.00239  | 4.23898 | 1.57533  | ENSG00000165359:intron   | ENSG00000225235 | 135520082-135520674 | - | -11499  |
| X | 135741517 | 135741782 | 266 | 135741640 | 3.93344  | 3.19748 | 0.41301  | intergenic               | ENSG00000233861 | 135730732-135732197 | - | -9452   |
| X | 136477029 | 136477233 | 205 | 136477195 | 4.06198  | 3.28009 | 0.47041  | intergenic               | ENSG00000102239 | 136487886-136493780 | + | -10755  |
| X | 139415940 | 139416385 | 446 | 139415996 | 3.77589  | 3.20345 | 0.30123  | intergenic               | ENSG00000232549 | 139446890-139447676 | + | -30728  |
| X | 139738652 | 139738875 | 224 | 139738777 | 6.88374  | 4.62434 | 2.28385  | ENSG00000101974:intron   | ENSG00000101977 | 139581769-139708227 | - | -30536  |
| X | 139979252 | 139979480 | 229 | 139979411 | 5.82254  | 4.12626 | 1.42733  | intergenic               | ENSG00000203933 | 139955724-139965520 | - | -13845  |
| X | 142039875 | 142040299 | 425 | 142039975 | 4.56295  | 3.60388 | 0.59373  | intergenic               | ENSG00000236205 | 142147861-142148866 | - | 108779  |
| X | 142158929 | 142159146 | 218 | 142159007 | 3.03786  | 2.80302 | 0.15111  | intergenic               | ENSG00000236205 | 142147861-142148866 | - | -10171  |
| X | 148014664 | 148014903 | 240 | 148014800 | 4.56295  | 3.60388 | 0.59373  | ENSG00000176988:intron   | ENSG00000201285 | 148008099-148008215 | - | -6568   |
| X | 148247244 | 148247553 | 310 | 148247534 | 3.49438  | 2.91742 | 0.30123  | intergenic               | ENSG00000233467 | 148198013-148198878 | - | -48520  |

|   |           |           |     |           |         |         |         |                        |                 |                     |   |        |
|---|-----------|-----------|-----|-----------|---------|---------|---------|------------------------|-----------------|---------------------|---|--------|
| X | 151968797 | 151969102 | 306 | 151969053 | 3.69765 | 3.15177 | 0.30123 | ENSG00000102287:intron | ENSG00000102287 | 151953123-151974680 | - | 5731   |
| Y | 56763398  | 56763606  | 209 | 56763473  | 9.09099 | 5.60604 | 4.18865 | intergenic             | ENSG00000235857 | 56855243-56855488   | + | -91741 |
| Y | 56822614  | 56822836  | 223 | 56822731  | 3.49438 | 2.91742 | 0.30123 | intergenic             | ENSG00000235857 | 56855243-56855488   | + | -32518 |
| Y | 56763398  | 56763606  | 209 | 56763473  | 9.09099 | 5.60604 | 4.18865 | intergenic             | ENSG00000235857 | 56855243-56855488   | + | -91741 |
| Y | 56822614  | 56822836  | 223 | 56822731  | 3.49438 | 2.91742 | 0.30123 | intergenic             | ENSG00000235857 | 56855243-56855488   | + | -32518 |
