# Supplementary material for: JunB is a key regulator of multiple myeloma bone marrow angiogenesis
Source: PubMed Central journal article supplement (PMC8632680; doi:10.1038/s41375-021-01271-9), 2021-05-18
Supplement: 41375_2021_1271_MOESM3_ESM.pdf [file 41375_2021_1271_MOESM3_ESM.pdf]

| Ensembl Gene ID | Gene ID   | Tax ID     | Gene Symbol     | Description                                          |
|-----------------|-----------|------------|-----------------|------------------------------------------------------|
| ENSG00000144452 | 26154     | H. sapiens | ABCA12          | ATP binding cassette subfamily A member 12           |
| ENSG00000153093 | 55289     | H. sapiens | ACOXL           | acyl-CoA oxidase like acid phosphatase 7,            |
| ENSG00000183760 | 390928    | H. sapiens | ACP7            | tartrate resistant (putative)                        |
| ENSG00000164398 | 23305     | H. sapiens | ACSL6           | acyl-CoA synthetase long chain family member 6       |
| ENSG00000170634 | 98        | H. sapiens | ACYP2           | acylphosphatase 2                                    |
| ENSG00000196839 | 100       | H. sapiens | ADA             | adenosine deaminase                                  |
| ENSG00000267511 | 100422407 | H. sapiens | ADAD1P2         | adenosine deaminase domain containing 1 pseudogene 2 |
| ENSG00000104755 | 2515      | H. sapiens | ADAM2           | ADAM metallopeptidase domain 2                       |
| ENSG00000114948 | 8745      | H. sapiens | ADAM23          | ADAM metallopeptidase domain 23                      |
| ENSG00000218052 | 642935    | H. sapiens | ADAMTS7P4       | ADAMTS7 pseudogene 4                                 |
| ENSG00000173175 | 111       | H. sapiens | ADCY5           | adenylate cyclase 5                                  |
| ENSG00000128271 | 135       | H. sapiens | ADORA2A         | adenosine A2a receptor                               |
| ENSG00000170425 | 136       | H. sapiens | ADORA2B         | adenosine A2b receptor                               |
| ENSG00000170214 | 147       | H. sapiens | ADRA1B          | adrenoceptor alpha 1B                                |
| ENSG00000169252 | 154       | H. sapiens | ADRB2           | adrenoceptor beta 2                                  |
| ENSG00000157510 | 134265    | H. sapiens | AFAP1L1         | actin filament associated protein 1 like 1           |
| ENSG00000230114 | 101929721 | H. sapiens | AGBL4-AS1       | AGBL4 antisense RNA 1                                |
| ENSG00000026652 | 56895     | H. sapiens | AGPAT4          | 1-acylglycerol-3-phosphate O-acyltransferase 4       |
| ENSG00000233955 | 402093    | H. sapiens | AHCYP3          | adenosylhomocysteinase pseudogene 3                  |
| ENSG00000124942 | 79026     | H. sapiens | AHNAK           | AHNAK nucleoprotein                                  |
| ENSG00000163568 | 9447      | H. sapiens | AIM2            | absent in melanoma 2                                 |
| ENSG00000256614 | 100132086 | H. sapiens | AK6P1           | adenylate kinase 6 pseudogene 1                      |
| ENSG00000106948 | 80709     | H. sapiens | AKNA            | AT-hook transcription factor                         |
| ENSG00000166025 | 154810    | H. sapiens | AMOTL1          | angiominin like 1                                    |
| ENSG00000174945 | 155185    | H. sapiens | AMZ1            | archaelysin family metallopeptidase 1                |
| ENSG00000151687 | 150709    | H. sapiens | ANKAR           | ankyrin and armadillo repeat containing              |
| ENSG00000254996 | 404734    | H. sapiens | ANKHD1-EIF4EBP3 | ANKHD1-EIF4EBP3 readthrough                          |
| ENSG00000206560 | 23243     | H. sapiens | ANKRD28         | ankyrin repeat domain 28                             |
| ENSG00000135976 | 375248    | H. sapiens | ANKRD36         | ankyrin repeat domain 36                             |
| ENSG00000151458 | 57182     | H. sapiens | ANKRD50         | ankyrin repeat domain 50                             |
| ENSG00000135046 | 301       | H. sapiens | ANXA1           | annexin A1                                           |
| ENSG00000122359 | 311       | H. sapiens | ANXA11          | annexin A11                                          |
| ENSG00000148120 | 84909     | H. sapiens | AOPEP           | aminopeptidase 0 (putative)                          |
| ENSG00000134817 | 187       | H. sapiens | APLNR           | apelin receptor                                      |

|                 |           |            |                           |                                                                          |
|-----------------|-----------|------------|---------------------------|--------------------------------------------------------------------------|
| ENSG00000179750 | 9582      | H. sapiens | APOBEC3B                  | apolipoprotein B mRNA editing enzyme catalytic subunit 3B                |
| ENSG00000146376 | 93663     | H. sapiens | ARHGAP18                  | Rho GTPase activating protein 18                                         |
| ENSG00000215769 | 109286553 | H. sapiens | ARHGAP27P1-BPTFP1-KPNA2P3 | ARHGAP27P1-BPTFP1-KPNA2P3 readthrough, transcribed pseudogene            |
| ENSG00000224891 | 107985793 | H. sapiens | BPTFP1-KPNA2P3            | readthrough, transcribed pseudogene                                      |
| ENSG00000114098 | 25852     | H. sapiens | ARL14EPP1                 | ARL14EP pseudogene 1                                                     |
| ENSG00000153317 | 50807     | H. sapiens | ARMC8                     | armadillo repeat containing 8                                            |
| ENSG00000168010 | 89849     | H. sapiens | ASAP1                     | ArfGAP with SH3 domain, ankyrin repeat and PH domain 1                   |
| ENSG00000101844 | 115201    | H. sapiens | ATG16L2                   | autophagy related 16 like 2                                              |
| ENSG00000101892 | 23439     | H. sapiens | ATG4A                     | autophagy related 4A cysteine peptidase                                  |
| ENSG00000271614 | 338758    | H. sapiens | ATP1B4                    | ATPase Na <sup>+</sup> /K <sup>+</sup> transporting family member beta 4 |
| ENSG00000058668 | 493       | H. sapiens | ATP2B1-AS1                | ATP2B1 antisense RNA 1                                                   |
| ENSG00000017260 | 27032     | H. sapiens | ATP2B4                    | ATPase plasma membrane Ca <sup>2+</sup> transporting 4                   |
| ENSG00000186009 | 496       | H. sapiens | ATP2C1                    | ATPase secretory pathway Ca <sup>2+</sup> transporting 1                 |
| ENSG00000214025 | 100422514 | H. sapiens | ATP4B                     | ATPase H <sup>+</sup> /K <sup>+</sup> transporting subunit beta          |
| ENSG00000205464 | 92270     | H. sapiens | ATP5PBP4                  | ATP synthase peripheral stalk-membrane subunit b pseudogene 4            |
| ENSG00000171130 | 155066    | H. sapiens | ATP6AP1L                  | ATPase H <sup>+</sup> transporting accessory protein 1 like              |
| ENSG00000169255 | 8706      | H. sapiens | ATP6VOE2                  | ATPase H <sup>+</sup> transporting V0 subunit e2                         |
| ENSG00000162630 | 8707      | H. sapiens | B3GALNT1                  | beta-1,3-N-acetylgalactosaminyltransferase 1 (globoside blood group)     |
| ENSG00000135454 | 2583      | H. sapiens | B3GALT2                   | beta-1,3-galactosyltransferase 2                                         |
| ENSG00000153064 | 55024     | H. sapiens | B4GALNT1                  | beta-1,4-N-acetyl-galactosaminyltransferase 1                            |
| ENSG00000105327 | 27113     | H. sapiens | BANK1                     | B cell scaffold protein with ankyrin repeats 1                           |
| ENSG00000140463 | 585       | H. sapiens | BBC3                      | BCL2 binding component 3                                                 |
| ENSG00000060982 | 586       | H. sapiens | BBS4                      | Bardet-Biedl syndrome 4                                                  |
| ENSG00000114200 | 590       | H. sapiens | BCAT1                     | branched chain amino acid transaminase 1                                 |
|                 |           |            | BCHE                      | butyrylcholinesterase                                                    |

|                 |           |            |              |                                                            |
|-----------------|-----------|------------|--------------|------------------------------------------------------------|
| ENSG00000116128 | 607       | H. sapiens | BCL9         | BCL9 transcription coactivator                             |
| ENSG00000188848 | 389206    | H. sapiens | BEND4        | BEN domain containing 4                                    |
| ENSG00000105829 | 10282     | H. sapiens | BET1         | Bet1 golgi vesicular membrane trafficking protein          |
| ENSG00000132840 | 23743     | H. sapiens | BHMT2        | betaine--homocysteine S-methyltransferase 2                |
| ENSG00000100290 | 638       | H. sapiens | BIK          | BCL2 interacting killer                                    |
| ENSG00000110934 | 51411     | H. sapiens | BIN2         | bridging integrator 2                                      |
| ENSG00000104081 | 90427     | H. sapiens | BMF          | Bcl2 modifying factor                                      |
| ENSG00000164603 | 154743    | H. sapiens | BMT2         | base methyltransferase of 25S rRNA 2 homolog               |
| ENSG00000269055 | 106481693 | H. sapiens | BNIP3P18     | BCL2 interacting protein 3 pseudogene 18                   |
| ENSG00000269431 | 100421710 | H. sapiens | BNIP3P8      | BCL2 interacting protein 3 pseudogene 8                    |
| ENSG00000189325 | 389384    | H. sapiens | BNIP5        | BCL2 interacting protein 5                                 |
| ENSG00000157764 | 673       | H. sapiens | BRAF         | B-Raf proto-oncogene, serine/threonine kinase              |
| ENSG00000102239 | 680       | H. sapiens | BRS3         | bombesin receptor subtype 3                                |
| ENSG00000262609 | 100132641 | H. sapiens | BTF3P14      | basic transcription factor 3 pseudogene 14                 |
| ENSG00000112578 | 705       | H. sapiens | BYSL         | bystin like                                                |
| ENSG00000143633 | 128061    | H. sapiens | C1orf131     | chromosome 1 open reading frame 131                        |
| ENSG00000240770 | 246312    | H. sapiens | C21orf91-OT1 | C21orf91 overlapping transcript 1                          |
| ENSG00000171860 | 719       | H. sapiens | C3AR1        | complement C3a receptor 1                                  |
| ENSG00000203711 | 100130967 | H. sapiens | C6orf99      | chromosome 6 putative open reading frame 99                |
| ENSG00000221845 | 401335    | H. sapiens | C7orf65      | chromosome 7 putative open reading frame 65                |
| ENSG00000141837 | 773       | H. sapiens | CACNA1A      | calcium voltage-gated channel subunit alpha1 A             |
| ENSG00000182389 | 785       | H. sapiens | CACNB4       | calcium voltage-gated channel auxiliary subunit beta 4     |
| ENSG00000183128 | 119395    | H. sapiens | CALHM3       | calcium homeostasis modulator 3                            |
| ENSG00000240809 | 401076    | H. sapiens | CAP1P1       | CAP1 pseudogene 1                                          |
| ENSG00000112186 | 10486     | H. sapiens | CAP2         | cyclase associated actin cytoskeleton regulatory protein 2 |
| ENSG00000162909 | 824       | H. sapiens | CAPN2        | calpain 2                                                  |
| ENSG00000110619 | 833       | H. sapiens | CARS1        | cysteinyl-tRNA synthetase 1                                |
| ENSG00000164326 | 9607      | H. sapiens | CARTPT       | CART prepropeptide                                         |
| ENSG00000257859 | 101929110 | H. sapiens | CASC18       | cancer susceptibility 18                                   |

|                 |           |            |          |                                                          |
|-----------------|-----------|------------|----------|----------------------------------------------------------|
| ENSG00000067955 | 865       | H. sapiens | CBBF     | core-binding factor subunit beta                         |
| ENSG00000105879 | 79872     | H. sapiens | CBLL1    | Cbl proto-oncogene like 1                                |
| ENSG00000203799 | 221262    | H. sapiens | CCDC162P | coiled-coil domain containing 162, pseudogene            |
| ENSG00000198937 | 154467    | H. sapiens | CCDC167  | coiled-coil domain containing 167                        |
| ENSG00000108702 | 6346      | H. sapiens | CCL1     | C-C motif chemokine ligand 1                             |
| ENSG00000160791 | 1234      | H. sapiens | CCR5     | C-C motif chemokine receptor 5                           |
| ENSG00000249958 | 100288772 | H. sapiens | CCT7P2   | chaperonin containing TCP1 subunit 7 pseudogene 2        |
| ENSG00000134061 | 4064      | H. sapiens | CD180    | CD180 molecule                                           |
| ENSG00000158477 | 909       | H. sapiens | CD1A     | CD1a molecule                                            |
| ENSG00000186074 | 146722    | H. sapiens | CD300LF  | CD300 molecule like family member f                      |
| ENSG00000026508 | 960       | H. sapiens | CD44     | CD44 molecule (Indian blood group)                       |
| ENSG00000196776 | 961       | H. sapiens | CD47     | CD47 molecule                                            |
| ENSG00000196352 | 1604      | H. sapiens | CD55     | CD55 molecule (Cromer blood group)                       |
| ENSG00000158402 | 995       | H. sapiens | CDC25C   | cell division cycle 25C                                  |
| ENSG00000226289 | 100420558 | H. sapiens | CDCA4P3  | cell division cycle associated 4 pseudogene 3            |
| ENSG00000113100 | 1007      | H. sapiens | CDH9     | cadherin 9                                               |
| ENSG00000136861 | 55755     | H. sapiens | CDK5RAP2 | CDK5 regulatory subunit associated protein 2             |
| ENSG00000135048 | 23670     | H. sapiens | CEMIP2   | cell migration inducing hyaluronidase 2                  |
| ENSG00000226982 | 1061      | H. sapiens | CENPCP1  | centromere protein C pseudogene 1                        |
| ENSG00000188452 | 375298    | H. sapiens | CERKL    | ceramide kinase like                                     |
| ENSG00000172292 | 253782    | H. sapiens | CERS6    | ceramide synthase 6                                      |
| ENSG00000188596 | 144535    | H. sapiens | CFAP54   | cilia and flagella associated protein 54                 |
| ENSG00000183833 | 89876     | H. sapiens | CFAP91   | cilia and flagella associated protein 91                 |
| ENSG00000177200 | 80205     | H. sapiens | CHD9     | chromodomain helicase DNA binding protein 9              |
| ENSG00000128656 | 1123      | H. sapiens | CHN1     | chimerin 1                                               |
| ENSG00000182022 | 51363     | H. sapiens | CHST15   | carbohydrate sulfotransferase 15                         |
| ENSG00000131873 | 22856     | H. sapiens | CHSY1    | chondroitin sulfate synthase 1                           |
| ENSG00000179583 | 4261      | H. sapiens | CIITA    | class II major histocompatibility complex transactivator |
| ENSG00000159212 | 54102     | H. sapiens | CLIC6    | chloride intracellular channel 6                         |
| ENSG00000165959 | 79789     | H. sapiens | CLMN     | calmin                                                   |

|                 |           |            |             |                                                                        |
|-----------------|-----------|------------|-------------|------------------------------------------------------------------------|
| ENSG00000196748 | 389383    | H. sapiens | CLPSL2      | colipase like 2                                                        |
| ENSG00000120885 | 1191      | H. sapiens | CLU         | clusterin                                                              |
| ENSG00000130176 | 1264      | H. sapiens | CNN1        | calponin 1                                                             |
| ENSG00000119946 | 26507     | H. sapiens | CNNM1       | cyclin and CBS domain<br>divalent metal cation<br>transport mediator 1 |
| ENSG00000113805 | 5067      | H. sapiens | CNTN3       | contactin 3                                                            |
| ENSG00000236795 | 101928700 | H. sapiens | CNTNAP2-AS1 | CNTNAP2 antisense RNA 1                                                |
| ENSG00000172752 | 256076    | H. sapiens | COL6A5      | collagen type VI alpha 5<br>chain                                      |
| ENSG00000206384 | 131873    | H. sapiens | COL6A6      | collagen type VI alpha 6<br>chain                                      |
| ENSG00000198756 | 23127     | H. sapiens | COLGALT2    | collagen beta(1-<br>0)galactosyltransferase 2                          |
| ENSG00000236041 | 106481684 | H. sapiens | COX6CP18    | cytochrome c oxidase<br>subunit 6C pseudogene 18                       |
| ENSG00000196353 | 131034    | H. sapiens | CPNE4       | copine 4                                                               |
| ENSG00000117322 | 1380      | H. sapiens | CR2         | complement C3d receptor 2                                              |
| ENSG00000143536 | 49860     | H. sapiens | CRNN        | cornulin                                                               |
| ENSG00000132693 | 1401      | H. sapiens | CRP         | C-reactive protein                                                     |
| ENSG00000109943 | 56253     | H. sapiens | CRTAM       | cytotoxic and regulatory T<br>cell molecule                            |
| ENSG00000100122 | 1414      | H. sapiens | CRYBB1      | crystallin beta B1                                                     |
| ENSG00000178662 | 80034     | H. sapiens | CSRNP3      | cysteine and serine rich<br>nuclear protein 3                          |
| ENSG00000230013 | 107987106 | H. sapiens | CT70        | cancer/testis associated<br>transcript 70                              |
| ENSG00000163599 | 1493      | H. sapiens | CTLA4       | cytotoxic T-lymphocyte<br>associated protein 4                         |
| ENSG00000198730 | 9646      | H. sapiens | CTR9        | CTR9 homolog, Paf1/RNA<br>polymerase II complex<br>component           |
| ENSG00000109861 | 1075      | H. sapiens | CTSC        | cathepsin C                                                            |
| ENSG00000107611 | 8029      | H. sapiens | CUBN        | cubilin                                                                |
| ENSG00000257923 | 1523      | H. sapiens | CUX1        | cut like homeobox 1                                                    |
| ENSG00000163510 | 57703     | H. sapiens | CWC22       | CWC22 spliceosome<br>associated protein homolog                        |
| ENSG00000152404 | 143884    | H. sapiens | CWF19L2     | CWF19 like cell cycle<br>control factor 2                              |
| ENSG00000180871 | 3579      | H. sapiens | CXCR2       | C-X-C motif chemokine<br>receptor 2                                    |
| ENSG00000186810 | 2833      | H. sapiens | CXCR3       | C-X-C motif chemokine<br>receptor 3                                    |
| ENSG00000203933 | 347487    | H. sapiens | CXorf66     | chromosome X open reading<br>frame 66                                  |
| ENSG00000172115 | 54205     | H. sapiens | CYCS        | cytochrome c, somatic                                                  |
| ENSG00000019186 | 1591      | H. sapiens | CYP24A1     | cytochrome P450 family 24<br>subfamily A member 1                      |
| ENSG00000197838 | 1553      | H. sapiens | CYP2A13     | cytochrome P450 family 2<br>subfamily A member 13                      |

|                 |           |            |           |                                                            |
|-----------------|-----------|------------|-----------|------------------------------------------------------------|
| ENSG00000226450 | 1568      | H. sapiens | CYP2D8P   | ccytochrome P450 family 2 subfamily D member 8, pseudogene |
| ENSG00000186104 | 120227    | H. sapiens | CYP2R1    | cytochrome P450 family 2 subfamily R member 1              |
| ENSG00000186204 | 66002     | H. sapiens | CYP4F12   | cytochrome P450 family 4 subfamily F member 12             |
| ENSG00000273330 | 100422235 | H. sapiens | CYP4F36P  | cytochrome P450 family 4 subfamily F member 36, pseudogene |
| ENSG00000271286 | 100418871 | H. sapiens | CYTH1P1   | CYTH1 pseudogene 1                                         |
| ENSG00000170891 | 54360     | H. sapiens | CYTL1     | cytokine like 1 differentiation                            |
| ENSG00000226950 | 57291     | H. sapiens | DANCR     | antagonizing non-protein coding RNA                        |
| ENSG00000112977 | 1611      | H. sapiens | DAP       | death associated protein                                   |
| ENSG00000251380 | 140947    | H. sapiens | DCANP1    | dendritic cell associated nuclear protein                  |
| ENSG00000213722 | 23564     | H. sapiens | DDAH2     | dimethylarginine dimethylaminohydrolase 2                  |
| ENSG00000270763 | 100533714 | H. sapiens | DDX43P2   | DEAD-box helicase 43 pseudogene 2                          |
| ENSG00000160570 | 162989    | H. sapiens | DEDD2     | death effector domain containing 2                         |
| ENSG00000121644 | 51029     | H. sapiens | DESI2     | desumoylating isopeptidase 2                               |
| ENSG00000058866 | 1608      | H. sapiens | DGKG      | diacylglycerol kinase gamma                                |
| ENSG00000067596 | 1659      | H. sapiens | DHX8      | DEAH-box helicase 8                                        |
| ENSG00000143006 | 63948     | H. sapiens | DMRTB1    | DMRT like family B with proline rich C-terminal 1          |
| ENSG00000114841 | 25981     | H. sapiens | DNAH1     | dynein axonemal heavy chain 1                              |
| ENSG00000105877 | 8701      | H. sapiens | DNAH11    | dynein axonemal heavy chain 11                             |
| ENSG00000105993 | 10049     | H. sapiens | DNAJB6    | DnaJ heat shock protein family (Hsp40) member B6           |
| ENSG00000168724 | 134218    | H. sapiens | DNAJC21   | DnaJ heat shock protein family (Hsp40) member C21          |
| ENSG00000130226 | 1804      | H. sapiens | DPP6      | dipeptidyl peptidase like 6                                |
| ENSG00000231839 | 100420073 | H. sapiens | DPY19L4P2 | DPY19L4 pseudogene 2                                       |
| ENSG00000113657 | 1809      | H. sapiens | DPYSL3    | dihydropyrimidinase like 3                                 |
| ENSG00000149295 | 1813      | H. sapiens | DRD2      | dopamine receptor D2                                       |
| ENSG00000235123 | 100506492 | H. sapiens | DSCAM-AS1 | DSCAM antisense RNA 1                                      |
| ENSG00000079393 | 51207     | H. sapiens | DUSP13    | dual specificity phosphatase 13                            |
| ENSG00000184545 | 1850      | H. sapiens | DUSP8     | dual specificity phosphatase 8                             |
| ENSG00000280457 | 728410    | H. sapiens | DUX4L2    | double homeobox 4 like 2 (pseudogene)                      |

|                 |           |            |            |                                                                   |
|-----------------|-----------|------------|------------|-------------------------------------------------------------------|
| ENSG00000248820 | 100288885 | H. sapiens | DYNLL1P6   | dynein light chain LC8-type 1 pseudogene 6                        |
| ENSG00000157540 | 1859      | H. sapiens | DYRK1A     | dual specificity tyrosine phosphorylation regulated kinase 1A     |
| ENSG00000231105 | 100506801 | H. sapiens | ECE1-AS1   | ECE1 antisense RNA 1                                              |
| ENSG00000236991 | 101927983 | H. sapiens | EDRF1-AS1  | EDRF1 antisense RNA 1                                             |
| ENSG00000096093 | 114327    | H. sapiens | EFHC1      | EF-hand domain containing 1                                       |
| ENSG00000132294 | 23167     | H. sapiens | EFR3A      | EFR3 homolog A                                                    |
| ENSG00000224057 | 100507500 | H. sapiens | EGFR-AS1   | EGFR antisense RNA 1                                              |
| ENSG00000013016 | 30845     | H. sapiens | EHD3       | EH domain containing 3                                            |
| ENSG00000236357 | 100129423 | H. sapiens | EI24P1     | EI24 pseudogene 1                                                 |
| ENSG00000234028 | 101928403 | H. sapiens | EIF2AK3-DT | EIF2AK3 divergent transcript                                      |
| ENSG00000277998 | 100462836 | H. sapiens | EIF3EP3    | eukaryotic translation initiation factor 3 subunit E pseudogene 3 |
| ENSG00000237064 | 442720    | H. sapiens | EIF3IP1    | eukaryotic translation initiation factor 3 subunit I pseudogene 1 |
| ENSG00000233544 | 100129045 | H. sapiens | EIF3KP2    | eukaryotic translation initiation factor 3 subunit K pseudogene 2 |
| ENSG00000163577 | 56648     | H. sapiens | EIF5A2     | eukaryotic translation initiation factor 5A2                      |
| ENSG00000111145 | 2004      | H. sapiens | ELK3       | ETS transcription factor ELK3                                     |
| ENSG00000224101 | 100861514 | H. sapiens | ELMO1-AS1  | ELMO1 antisense RNA 1                                             |
| ENSG00000070061 | 8518      | H. sapiens | ELP1       | elongator complex protein 1                                       |
| ENSG00000170571 | 133418    | H. sapiens | EMB        | embigin                                                           |
| ENSG00000086289 | 54749     | H. sapiens | EPDR1      | ependymin related 1                                               |
| ENSG00000154928 | 2047      | H. sapiens | EPHB1      | EPH receptor B1                                                   |
| ENSG00000083782 | 1833      | H. sapiens | EPYC       | epiphycan                                                         |
| ENSG00000175595 | 2072      | H. sapiens | ERCC4      | ERCC excision repair 4, endonuclease catalytic subunit            |
| ENSG00000178607 | 2081      | H. sapiens | ERN1       | endoplasmic reticulum to nucleus signaling 1                      |
| ENSG00000164283 | 11082     | H. sapiens | ESM1       | endothelial cell specific molecule 1                              |
| ENSG00000265992 | 790952    | H. sapiens | ESRG       | embryonic stem cell related                                       |
| ENSG00000158220 | 83850     | H. sapiens | ESYT3      | extended synaptotagmin 3                                          |
| ENSG00000143971 | 54465     | H. sapiens | ETAA1      | ETAA1 activator of ATR kinase                                     |
| ENSG00000107371 | 51010     | H. sapiens | EXOSC3     | exosome component 3                                               |
| ENSG00000112319 | 2070      | H. sapiens | EYA4       | EYA transcriptional coactivator and phosphatase 4                 |

|                 |           |            |          |                                                                     |
|-----------------|-----------|------------|----------|---------------------------------------------------------------------|
| ENSG00000163586 | 2168      | H. sapiens | FABP1    | fatty acid binding protein 1                                        |
| ENSG00000234545 | 257415    | H. sapiens | FAM133B  | family with sequence similarity 133 member B                        |
| ENSG00000147724 | 51059     | H. sapiens | FAM135B  | family with sequence similarity 135 member B                        |
| ENSG00000236438 | 728262    | H. sapiens | FAM157A  | family with sequence similarity 157 member A                        |
| ENSG00000164142 | 729830    | H. sapiens | FAM160A1 | family with sequence similarity 160 member A1                       |
| ENSG00000243062 | 148753    | H. sapiens | FAM163A  | family with sequence similarity 163 member A                        |
| ENSG00000164556 | 340286    | H. sapiens | FAM183BP | acyloxyacyl hydrolase (neutrophil)                                  |
| ENSG00000111879 | 79632     | H. sapiens | FAM184A  | family with sequence similarity 184 member A                        |
| ENSG00000135063 | 9413      | H. sapiens | FAM189A2 | family with sequence similarity 189 member A2                       |
| ENSG00000189157 | 100129583 | H. sapiens | FAM47E   | family with sequence similarity 47 member E                         |
| ENSG00000180219 | 196472    | H. sapiens | FAM71C   | family with sequence similarity 71 member C                         |
| ENSG00000203780 | 92565     | H. sapiens | FANK1    | fibronectin type III and ankyrin repeat domains 1                   |
| ENSG00000146267 | 84553     | H. sapiens | FAXC     | failed axon connections homolog, metaxin like GST domain containing |
| ENSG00000239997 | 100128733 | H. sapiens | FCF1P3   | FCF1 pseudogene 3                                                   |
| ENSG00000146192 | 221472    | H. sapiens | FGD2     | FYVE, RhoGEF and PH domain containing 2                             |
| ENSG00000231426 | 100132735 | H. sapiens | FILNC1   | FOXO induced long non-coding RNA 1                                  |
| ENSG00000229515 | 391533    | H. sapiens | FLT1P1   | FLT1 pseudogene 1                                                   |
| ENSG00000075420 | 64778     | H. sapiens | FNDC3B   | fibronectin type III domain containing 3B                           |
| ENSG00000075426 | 2355      | H. sapiens | FOSL2    | FOS like 2, AP-1 transcription factor subunit                       |
| ENSG00000054598 | 2296      | H. sapiens | FOXC1    | forkhead box C1                                                     |
| ENSG00000118689 | 2309      | H. sapiens | FOXO3    | forkhead box O3                                                     |
| ENSG00000179772 | 2307      | H. sapiens | FOXS1    | forkhead box S1                                                     |
| ENSG00000282826 | 100289097 | H. sapiens | FRG1CP   | FSHD region gene 1 family member C, pseudogene                      |
| ENSG00000151474 | 55691     | H. sapiens | FRMD4A   | FERM domain containing 4A                                           |
| ENSG00000087086 | 2512      | H. sapiens | FTL      | ferritin light chain                                                |
| ENSG00000082074 | 2533      | H. sapiens | FYB1     | FYN binding protein 1                                               |
| ENSG00000122068 | 84248     | H. sapiens | FYTTD1   | forty-two-three domain containing 1                                 |
| ENSG00000123689 | 50486     | H. sapiens | GOS2     | G0/G1 switch 2                                                      |
| ENSG00000235651 | 100422338 | H. sapiens | G3BP1P1  | G3BP1 pseudogene 1                                                  |



|                 |           |            |          |                                                               |
|-----------------|-----------|------------|----------|---------------------------------------------------------------|
| ENSG00000102287 | 2564      | H. sapiens | GABRE    | gamma-aminobutyric acid<br>type A receptor subunit<br>epsilon |
| ENSG00000143641 | 2590      | H. sapiens | GALNT2   | polypeptide N-<br>acetylgalactosaminyltransf<br>erase 2       |
| ENSG00000115339 | 2591      | H. sapiens | GALNT3   | polypeptide N-<br>acetylgalactosaminyltransf<br>erase 3       |
| ENSG00000117228 | 2633      | H. sapiens | GBP1     | guanylate binding protein<br>1                                |
| ENSG00000115263 | 2641      | H. sapiens | GCG      | glucagon                                                      |
| ENSG00000100031 | 2678      | H. sapiens | GGT1     | gamma-glutamyltransferase<br>1                                |
| ENSG00000112964 | 2690      | H. sapiens | GHR      | growth hormone receptor                                       |
| ENSG00000106128 | 2692      | H. sapiens | GHRHR    | growth hormone releasing<br>hormone receptor                  |
| ENSG00000254765 | 2754      | H. sapiens | GLULP2   | glutamate-ammonia ligase<br>pseudogene 2                      |
| ENSG00000185838 | 54584     | H. sapiens | GNB1L    | G protein subunit beta 1<br>like                              |
| ENSG00000173905 | 27333     | H. sapiens | GOLIM4   | golgi integral membrane<br>protein 4                          |
| ENSG00000166734 | 113201    | H. sapiens | GOLM2    | golgi membrane protein 2                                      |
| ENSG00000236520 | 100873972 | H. sapiens | GPC6-AS1 | GPC6 antisense RNA 1                                          |
| ENSG00000164850 | 2852      | H. sapiens | GPER1    | G protein-coupled estrogen<br>receptor 1                      |
| ENSG00000175697 | 165829    | H. sapiens | GPR156   | G protein-coupled receptor<br>156                             |
| ENSG00000143147 | 23432     | H. sapiens | GPR161   | G protein-coupled receptor<br>161                             |
| ENSG00000185477 | 285513    | H. sapiens | GPRIN3   | GPRIN family member 3                                         |
| ENSG00000141738 | 2886      | H. sapiens | GRB7     | growth factor receptor<br>bound protein 7                     |
| ENSG00000137106 | 9380      | H. sapiens | GRHPR    | glyoxylate and<br>hydroxypyruvate reductase                   |
| ENSG00000168959 | 2915      | H. sapiens | GRM5     | glutamate metabotropic<br>receptor 5                          |
| ENSG00000109519 | 80273     | H. sapiens | GRPEL1   | GrpE like 1, mitochondrial                                    |
| ENSG00000105928 | 1687      | H. sapiens | GSDME    | gasdermin E                                                   |
| ENSG00000174156 | 2940      | H. sapiens | GSTA3    | glutathione S-transferase<br>alpha 3                          |
| ENSG00000232829 | 344813    | H. sapiens | GSTO3P   | glutathione S-transferase<br>omega 3, pseudogene              |
| ENSG00000197265 | 2961      | H. sapiens | GTF2E2   | general transcription<br>factor IIE subunit 2                 |
| ENSG00000077235 | 2975      | H. sapiens | GTF3C1   | general transcription<br>factor IIIC subunit 1                |
| ENSG00000124196 | 149699    | H. sapiens | GTSF1L   | gametocyte specific factor<br>1 like                          |

|                 |           |            |          |                                                           |
|-----------------|-----------|------------|----------|-----------------------------------------------------------|
| ENSG00000197465 | 2996      | H. sapiens | GYPE     | glycophorin E (MNS blood group)                           |
| ENSG00000243977 | 115482685 | H. sapiens | H3P13    | H3 histone pseudogene 13                                  |
| ENSG00000251596 | 3031      | H. sapiens | HADHAP1  | HADHA pseudogene 1                                        |
| ENSG00000228789 | 285834    | H. sapiens | HCG22    | HLA complex group 22                                      |
| ENSG00000180353 | 3059      | H. sapiens | HCLS1    | hematopoietic cell-specific Lyn substrate 1               |
| ENSG00000233012 | 100419489 | H. sapiens | HDAC1P2  | histone deacetylase 1 pseudogene 2                        |
| ENSG00000196591 | 3066      | H. sapiens | HDAC2    | histone deacetylase 2                                     |
| ENSG00000173706 | 57493     | H. sapiens | HEG1     | heart development protein with EGF like domains 1         |
| ENSG00000187821 | 391723    | H. sapiens | HELT     | helt bHLH transcription factor                            |
| ENSG00000261418 | 8918      | H. sapiens | HERC2P6  | hect domain and RLD 2 pseudogene 6                        |
| ENSG00000132297 | 10086     | H. sapiens | HHLA1    | HERV-H LTR-associating 1                                  |
| ENSG00000064393 | 28996     | H. sapiens | HIPK2    | homeodomain interacting protein kinase 2                  |
| ENSG00000095951 | 3096      | H. sapiens | HIVEP1   | HIVEP zinc finger 1                                       |
| ENSG00000243753 | 3139      | H. sapiens | HLA-L    | major histocompatibility complex, class I, L (pseudogene) |
| ENSG00000228808 | 100873890 | H. sapiens | HMGB3P4  | high mobility group box 3 pseudogene 4                    |
| ENSG00000213305 | 100421794 | H. sapiens | HNRNPCP6 | heterogeneous nuclear ribonucleoprotein C pseudogene 6    |
| ENSG00000228653 | 100127907 | H. sapiens | HNRNPCP7 | heterogeneous nuclear ribonucleoprotein C pseudogene 7    |
| ENSG00000120094 | 3211      | H. sapiens | HOXB1    | homeobox B1                                               |
| ENSG00000182601 | 9951      | H. sapiens | HS3ST4   | heparan sulfate-glucosamine 3-sulfotransferase 4          |
| ENSG00000157423 | 54768     | H. sapiens | HYDIN    | HYDIN axonemal central pair apparatus protein             |
| ENSG00000108622 | 3384      | H. sapiens | ICAM2    | intercellular adhesion molecule 2                         |
| ENSG00000163565 | 3428      | H. sapiens | IFI16    | interferon gamma inducible protein 16                     |
| ENSG00000159110 | 3455      | H. sapiens | IFNAR2   | interferon alpha and beta receptor subunit 2              |
| ENSG00000159128 | 3460      | H. sapiens | IFNGR2   | interferon gamma receptor 2                               |
| ENSG00000109083 | 90410     | H. sapiens | IFT20    | intraflagellar transport 20                               |
| ENSG00000017427 | 3479      | H. sapiens | IGF1     | insulin like growth factor 1                              |
| ENSG00000197081 | 3482      | H. sapiens | IGF2R    | insulin like growth factor 2 receptor                     |

|                 |           |            |            |                                                       |
|-----------------|-----------|------------|------------|-------------------------------------------------------|
| ENSG00000204866 | 147920    | H. sapiens | IGFL2      | IGF like family member 2                              |
| ENSG00000211890 | 3494      | H. sapiens | IGHA2      | immunoglobulin heavy constant alpha 2 (A2m marker)    |
| ENSG00000136634 | 3586      | H. sapiens | IL10       | interleukin 10                                        |
| ENSG00000110324 | 3587      | H. sapiens | IL10RA     | interleukin 10 receptor subunit alpha                 |
| ENSG00000168811 | 3592      | H. sapiens | IL12A      | interleukin 12A                                       |
| ENSG00000244040 | 101928376 | H. sapiens | IL12A-AS1  | IL12A antisense RNA 1                                 |
| ENSG00000081985 | 3595      | H. sapiens | IL12RB2    | interleukin 12 receptor subunit beta 2                |
| ENSG00000112116 | 112744    | H. sapiens | IL17F      | interleukin 17F                                       |
| ENSG00000110944 | 51561     | H. sapiens | IL23A      | interleukin 23 subunit alpha                          |
| ENSG00000134460 | 3559      | H. sapiens | IL2RA      | interleukin 2 receptor subunit alpha                  |
| ENSG00000148153 | 58493     | H. sapiens | INIP       | INTS3 and NABP interacting protein                    |
| ENSG00000109452 | 8821      | H. sapiens | INPP4B     | inositol polyphosphate-4-phosphatase type II B        |
| ENSG00000198825 | 22876     | H. sapiens | INPP5F     | inositol polyphosphate-5-phosphatase F                |
| ENSG00000173404 | 3642      | H. sapiens | INSM1      | INSM transcriptional repressor 1                      |
| ENSG00000225235 | 100874118 | H. sapiens | INTS6L-AS1 | INTS6L antisense RNA 1                                |
| ENSG00000250492 | 285634    | H. sapiens | INTS6P1    | integrator complex subunit 6 pseudogene 1             |
| ENSG00000231871 | 100873949 | H. sapiens | IPO9-AS1   | IPO9 antisense RNA 1                                  |
| ENSG00000144711 | 9922      | H. sapiens | IQSEC1     | IQ motif and Sec7 domain ArfGEF 1                     |
| ENSG00000072952 | 10335     | H. sapiens | IRAG1      | inositol 1,4,5-triphosphate receptor associated 1     |
| ENSG00000136003 | 23479     | H. sapiens | ISCU       | iron-sulfur cluster assembly enzyme                   |
| ENSG00000172183 | 3669      | H. sapiens | ISG20      | interferon stimulated exonuclease gene 20             |
| ENSG00000169896 | 3684      | H. sapiens | ITGAM      | integrin subunit alpha M                              |
| ENSG00000143772 | 3707      | H. sapiens | ITPKB      | inositol-trisphosphate 3-kinase B                     |
| ENSG00000116679 | 10625     | H. sapiens | IVNS1ABP   | influenza virus NS1A binding protein                  |
| ENSG00000153814 | 221895    | H. sapiens | JAZF1      | JAZF zinc finger 1                                    |
| ENSG00000235012 | 729056    | H. sapiens | JCADP1     | JCAD pseudogene 1                                     |
| ENSG00000177606 | 3725      | H. sapiens | JUN        | Jun proto-oncogene, AP-1 transcription factor subunit |
| ENSG00000271108 | 100420841 | H. sapiens | KATNBL1P5  | katanin regulatory subunit B1 like 1 pseudogene 5     |
| ENSG00000242370 | 100874084 | H. sapiens | KCNAB1-AS1 | KCNAB1 antisense RNA 1                                |

|                 |           |            |             |                                                                           |
|-----------------|-----------|------------|-------------|---------------------------------------------------------------------------|
| ENSG00000129159 | 3746      | H. sapiens | KCNC1       | potassium voltage-gated channel subfamily C member 1                      |
| ENSG00000184408 | 3751      | H. sapiens | KCND2       | potassium voltage-gated channel subfamily D member 2                      |
| ENSG00000187486 | 3767      | H. sapiens | KCNJ11      | potassium inwardly rectifying channel subfamily J member 11               |
| ENSG00000157542 | 3763      | H. sapiens | KCNJ6       | potassium inwardly rectifying channel subfamily J member 6                |
| ENSG00000173338 | 10089     | H. sapiens | KCNK7       | potassium two pore domain channel subfamily K member 7                    |
| ENSG00000197584 | 10242     | H. sapiens | KCNMB2      | potassium calcium-activated channel subfamily M regulatory beta subunit 2 |
| ENSG00000170745 | 3790      | H. sapiens | KCNS3       | potassium voltage-gated channel modifier subfamily S member 3             |
| ENSG00000100196 | 11015     | H. sapiens | KDEL3       | KDEL endoplasmic reticulum protein retention receptor 3                   |
| ENSG00000132510 | 23135     | H. sapiens | KDM6B       | lysine demethylase 6B                                                     |
| ENSG00000138182 | 9585      | H. sapiens | KIF20B      | kinesin family member 20B                                                 |
| ENSG00000155090 | 7071      | H. sapiens | KLF10       | Kruppel like factor 10                                                    |
| ENSG00000067082 | 1316      | H. sapiens | KLF6        | Kruppel like factor 6                                                     |
| ENSG00000172578 | 89857     | H. sapiens | KLHL6       | kelch like family member 6                                                |
| ENSG00000214417 | 392371    | H. sapiens | KRT18P13    | keratin 18 pseudogene 13                                                  |
| ENSG00000240128 | 151825    | H. sapiens | KRT18P43    | keratin 18 pseudogene 43                                                  |
| ENSG00000265480 | 284085    | H. sapiens | KRT18P55    | keratin 18 pseudogene 55                                                  |
| ENSG00000249668 | 106479027 | H. sapiens | KRT18P56    | keratin 18 pseudogene 56                                                  |
| ENSG00000215208 | 100418829 | H. sapiens | KRT18P60    | keratin 18 pseudogene 60                                                  |
| ENSG00000187005 | 337977    | H. sapiens | KRTAP21-1   | keratin associated protein 21-1                                           |
| ENSG00000115919 | 8942      | H. sapiens | KYNU        | kynureninase                                                              |
| ENSG00000264707 | 101927150 | H. sapiens | L3MBTL4-AS1 | L3MBTL4 antisense RNA 1                                                   |
| ENSG00000078081 | 27074     | H. sapiens | LAMP3       | lysosomal associated membrane protein 3                                   |
| ENSG00000243438 | 106479034 | H. sapiens | LARP1BP2    | LARP1B pseudogene 2                                                       |
| ENSG00000271588 | 106480287 | H. sapiens | LARP7P1     | LARP7 pseudogene 1                                                        |
| ENSG00000119440 | 286310    | H. sapiens | LCN1P1      | lipocalin 1 pseudogene 1                                                  |
| ENSG00000232021 | 641518    | H. sapiens | LEF1-AS1    | LEF1 antisense RNA 1                                                      |
| ENSG00000185433 | 54072     | H. sapiens | LINC00158   | long intergenic non-protein coding RNA 158                                |
| ENSG00000226935 | 118421    | H. sapiens | LINC00161   | long intergenic non-protein coding RNA 161                                |
| ENSG00000203801 | 387111    | H. sapiens | LINC00222   | long intergenic non-protein coding RNA 222                                |

|                 |           |            |           |                                             |
|-----------------|-----------|------------|-----------|---------------------------------------------|
| ENSG00000259974 | 140828    | H. sapiens | LINC00261 | long intergenic non-protein coding RNA 261  |
| ENSG00000235665 | 339788    | H. sapiens | LINC00298 | long intergenic non-protein coding RNA 298  |
| ENSG00000179676 | 221241    | H. sapiens | LINC00305 | long intergenic non-protein coding RNA 305  |
| ENSG00000260388 | 100861549 | H. sapiens | LINC00562 | long intergenic non-protein coding RNA 562  |
| ENSG00000196243 | 439916    | H. sapiens | LINC00615 | long intergenic non-protein coding RNA 615  |
| ENSG00000233746 | 200261    | H. sapiens | LINC00656 | long intergenic non-protein coding RNA 656  |
| ENSG00000233570 | 100996597 | H. sapiens | LINC00690 | long intergenic non-protein coding RNA 690  |
| ENSG00000245164 | 100130231 | H. sapiens | LINC00861 | long intergenic non-protein coding RNA 861  |
| ENSG00000205634 | 400932    | H. sapiens | LINC00898 | long intergenic non-protein coding RNA 898  |
| ENSG00000236700 | 154092    | H. sapiens | LINC01010 | long intergenic non-protein coding RNA 1010 |
| ENSG00000230426 | 104169671 | H. sapiens | LINC01036 | long intergenic non-protein coding RNA 1036 |
| ENSG00000249464 | 285419    | H. sapiens | LINC01091 | long intergenic non-protein coding RNA 1091 |
| ENSG00000242512 | 100996490 | H. sapiens | LINC01206 | long intergenic non-protein coding RNA 1206 |
| ENSG00000250223 | 100874275 | H. sapiens | LINC01216 | long intergenic non-protein coding RNA 1216 |
| ENSG00000250739 | 101928971 | H. sapiens | LINC01262 | long intergenic non-protein coding RNA 1262 |
| ENSG00000233077 | 101927586 | H. sapiens | LINC01271 | long intergenic non-protein coding RNA 1271 |
| ENSG00000234722 | 103724390 | H. sapiens | LINC01287 | long intergenic non-protein coding RNA 1287 |
| ENSG00000205632 | 100128946 | H. sapiens | LINC01310 | long intergenic non-protein coding RNA 1310 |
| ENSG00000249343 | 101929082 | H. sapiens | LINC01333 | long intergenic non-protein coding RNA 1333 |
| ENSG00000228309 | 101929093 | H. sapiens | LINC01350 | long intergenic non-protein coding RNA 1350 |
| ENSG00000251324 | 104355294 | H. sapiens | LINC01386 | long intergenic non-protein coding RNA 1386 |
| ENSG00000234380 | 100506385 | H. sapiens | LINC01426 | long intergenic non-protein coding RNA 1426 |
| ENSG00000238284 | 101928795 | H. sapiens | LINC01448 | long intergenic non-protein coding RNA 1448 |
| ENSG00000249484 | 101927134 | H. sapiens | LINC01470 | long intergenic non-protein coding RNA 1470 |
| ENSG00000236849 | 101927258 | H. sapiens | LINC01474 | long intergenic non-protein coding RNA 1474 |

|                 |           |            |           |                                             |
|-----------------|-----------|------------|-----------|---------------------------------------------|
| ENSG00000231776 | 105377880 | H. sapiens | LINC01611 | long intergenic non-protein coding RNA 1611 |
| ENSG00000257242 | 256021    | H. sapiens | LINC01619 | long intergenic non-protein coding RNA 1619 |
| ENSG00000228397 | 101928043 | H. sapiens | LINC01635 | long intergenic non-protein coding RNA 1635 |
| ENSG00000227940 | 105372897 | H. sapiens | LINC01696 | long intergenic non-protein coding RNA 1696 |
| ENSG00000230324 | 339568    | H. sapiens | LINC01734 | long intergenic non-protein coding RNA 1734 |
| ENSG00000236720 | 101928778 | H. sapiens | LINC01741 | long intergenic non-protein coding RNA 1741 |
| ENSG00000235054 | 284661    | H. sapiens | LINC01777 | long intergenic non-protein coding RNA 1777 |
| ENSG00000231420 | 105373683 | H. sapiens | LINC01817 | long intergenic non-protein coding RNA 1817 |
| ENSG00000236914 | 107984773 | H. sapiens | LINC01852 | long intergenic non-protein coding RNA 1852 |
| ENSG00000254130 | 102557615 | H. sapiens | LINC01947 | long intergenic non-protein coding RNA 1947 |
| ENSG00000230401 | 105374293 | H. sapiens | LINC01972 | long intergenic non-protein coding RNA 1972 |
| ENSG00000204283 | 400624    | H. sapiens | LINC01973 | long intergenic non-protein coding RNA 1973 |
| ENSG00000242671 | 101927866 | H. sapiens | LINC02010 | long intergenic non-protein coding RNA 2010 |
| ENSG00000241544 | 105374177 | H. sapiens | LINC02029 | long intergenic non-protein coding RNA 2029 |
| ENSG00000267452 | 105371828 | H. sapiens | LINC02073 | long intergenic non-protein coding RNA 2073 |
| ENSG00000267065 | 101928514 | H. sapiens | LINC02080 | long intergenic non-protein coding RNA 2080 |
| ENSG00000214407 | 152225    | H. sapiens | LINC02085 | long intergenic non-protein coding RNA 2085 |
| ENSG00000272575 | 105369564 | H. sapiens | LINC02098 | long intergenic non-protein coding RNA 2098 |
| ENSG00000253490 | 101929450 | H. sapiens | LINC02099 | long intergenic non-protein coding RNA 2099 |
| ENSG00000259847 | 101927650 | H. sapiens | LINC02126 | long intergenic non-protein coding RNA 2126 |
| ENSG00000260264 | 105371142 | H. sapiens | LINC02194 | long intergenic non-protein coding RNA 2194 |
| ENSG00000250708 | 101928478 | H. sapiens | LINC02269 | long intergenic non-protein coding RNA 2269 |
| ENSG00000260423 | 101930452 | H. sapiens | LINC02367 | long intergenic non-protein coding RNA 2367 |
| ENSG00000257784 | 101927038 | H. sapiens | LINC02400 | long intergenic non-protein coding RNA 2400 |
| ENSG00000203585 | 100507175 | H. sapiens | LINC02408 | long intergenic non-protein coding RNA 2408 |

|                 |           |            |              |                                                                             |
|-----------------|-----------|------------|--------------|-----------------------------------------------------------------------------|
| ENSG00000246363 | 728084    | H. sapiens | LINC02458    | long intergenic non-protein coding RNA 2458                                 |
| ENSG00000234956 | 100507406 | H. sapiens | LINC02539    | long intergenic non-protein coding RNA 2539                                 |
| ENSG00000230943 | 101927686 | H. sapiens | LINC02541    | long intergenic non-protein coding RNA 2541                                 |
| ENSG00000256422 | 102723895 | H. sapiens | LINC02552    | long intergenic non-protein coding RNA 2552                                 |
| ENSG00000261780 | 100505817 | H. sapiens | LINC02582    | long intergenic non-protein coding RNA 2582                                 |
| ENSG00000187600 | 101805491 | H. sapiens | LINC02583    | long intergenic non-protein coding RNA 2583                                 |
| ENSG00000226251 | 101929541 | H. sapiens | LINC02608    | long intergenic non-protein coding RNA 2608                                 |
| ENSG00000224788 | 101928298 | H. sapiens | LINC02670    | long intergenic non-protein coding RNA 2670                                 |
| ENSG00000273409 | 101929497 | H. sapiens | LINC02712    | long intergenic non-protein coding RNA 2712                                 |
| ENSG00000256684 | 105369443 | H. sapiens | LINC02737    | long intergenic non-protein coding RNA 2737                                 |
| ENSG00000254968 | 101928823 | H. sapiens | LINC02763    | long intergenic non-protein coding RNA 2763                                 |
| ENSG00000229274 | 105375009 | H. sapiens | LINC02829    | long intergenic non-protein coding RNA 2829                                 |
| ENSG00000285536 | 105375273 | H. sapiens | LINC02838    | long intergenic non-protein coding RNA 2838                                 |
| ENSG00000236436 | 101928271 | H. sapiens | LINC02850    | long intergenic non-protein coding RNA 2850                                 |
| ENSG00000222004 | 285941    | H. sapiens | LINC02860    | long intergenic non-protein coding RNA 2860                                 |
| ENSG00000166035 | 3990      | H. sapiens | LIPC         | lipase C, hepatic type                                                      |
| ENSG00000163898 | 200879    | H. sapiens | LIPH         | lipase H                                                                    |
| ENSG00000143013 | 8543      | H. sapiens | LM04         | LIM domain only 4                                                           |
| ENSG00000162761 | 4009      | H. sapiens | LMX1A        | LIM homeobox transcription factor 1 alpha                                   |
| ENSG00000237396 | 101929685 | H. sapiens | LNCNEF       | lncRNA neighboring enhancer of FOXA2                                        |
| ENSG00000072201 | 84708     | H. sapiens | LNX1         | ligand of numb-protein X 1                                                  |
| ENSG00000250812 | 100128865 | H. sapiens | LOC100128865 | methyltransferase like 5 pseudogene                                         |
| ENSG00000238026 | 100131216 | H. sapiens | LOC100131216 | transmembrane protein 38B pseudogene                                        |
| ENSG00000231357 | 100131264 | H. sapiens | LOC100131264 | prefoldin subunit 4 pseudogene                                              |
| ENSG00000258262 | 100132126 | H. sapiens | LOC100132126 | mitochondrial carrier 2 pseudogene                                          |
| ENSG00000261522 | 100133920 | H. sapiens | LOC100133920 | methylenetetrahydrofolate dehydrogenase (NADP+ dependent) 1 like pseudogene |
| ENSG00000251473 | 100288146 | H. sapiens | LOC100288146 | nucleoporin Nup43-like                                                      |

|                 |           |    |         |              |                                                                     |
|-----------------|-----------|----|---------|--------------|---------------------------------------------------------------------|
| ENSG00000228729 | 100418874 | H. | sapiens | LOC100418874 | cathepsin B pseudogene                                              |
| ENSG00000223905 | 100418965 | H. | sapiens | LOC100418965 | peroxiredoxin 5 pseudogene                                          |
| ENSG00000236159 | 100419562 | H. | sapiens | LOC100419562 | ribosomal protein L13<br>pseudogene                                 |
| ENSG00000235951 | 100419685 | H. | sapiens | LOC100419685 | zinc finger protein 555<br>pseudogene                               |
| ENSG00000232327 | 100419739 | H. | sapiens | LOC100419739 | zinc finger protein 341<br>pseudogene                               |
| ENSG00000258134 | 100420186 | H. | sapiens | LOC100420186 | WW domain binding protein<br>2 pseudogene                           |
| ENSG00000226671 | 100420647 | H. | sapiens | LOC100420647 | voltage dependent anion<br>channel 3 pseudogene                     |
| ENSG00000254629 | 100420800 | H. | sapiens | LOC100420800 | suppressor of cytokine<br>signaling 6 pseudogene                    |
| ENSG00000270583 | 100420872 | H. | sapiens | LOC100420872 | ribosome binding factor A<br>(putative) pseudogene                  |
| ENSG00000264050 | 100421028 | H. | sapiens | LOC100421028 | gap junction protein alpha<br>4 pseudogene                          |
| ENSG00000230785 | 100421782 | H. | sapiens | LOC100421782 | heterogeneous nuclear<br>ribonucleoprotein A1 like<br>2 pseudogene  |
| ENSG00000236468 | 100421840 | H. | sapiens | LOC100421840 | eukaryotic translation<br>elongation factor 1 alpha<br>2 pseudogene |
| ENSG00000248791 | 100422687 | H. | sapiens | LOC100422687 | pleckstrin homology domain<br>containing A1 pseudogene              |
| ENSG00000223522 | 100505716 | H. | sapiens | LOC100505716 | uncharacterized<br>LOC100505716                                     |
| ENSG00000255521 | 100507144 | H. | sapiens | LOC100507144 | uncharacterized<br>LOC100507144                                     |
| ENSG00000236205 | 100533669 | H. | sapiens | LOC100533669 | MAGE family member A10<br>pseudogene                                |
| ENSG00000257550 | 100652999 | H. | sapiens | LOC100652999 | uncharacterized<br>LOC100652999                                     |
| ENSG00000237176 | 100996696 | H. | sapiens | LOC100996696 | polyadenylate-binding<br>protein 4 pseudogene                       |
| ENSG00000257855 | 101059974 | H. | sapiens | LOC101059974 | p53 and DNA damage-<br>regulated protein 1<br>pseudogene            |
| ENSG00000258133 | 101060021 | H. | sapiens | LOC101060021 | ADP-ribosylation factor 1<br>pseudogene                             |
| ENSG00000231252 | 101926964 | H. | sapiens | LOC101926964 | uncharacterized<br>LOC101926964                                     |
| ENSG00000238276 | 101927760 | H. | sapiens | LOC101927760 | uncharacterized<br>LOC101927760                                     |
| ENSG00000269985 | 101927972 | H. | sapiens | LOC101927972 | uncharacterized<br>LOC101927972                                     |
| ENSG00000232412 | 101928402 | H. | sapiens | LOC101928402 | uncharacterized<br>LOC101928402                                     |
| ENSG00000258274 | 101928731 | H. | sapiens | LOC101928731 | uncharacterized<br>LOC101928731                                     |



|                 |           |            |              |                                                                       |
|-----------------|-----------|------------|--------------|-----------------------------------------------------------------------|
| ENSG00000263063 | 101929552 | H. sapiens | LOC101929552 | uncharacterized<br>LOC101929552                                       |
| ENSG00000249635 | 101929577 | H. sapiens | LOC101929577 | uncharacterized<br>LOC101929577                                       |
| ENSG00000253671 | 101930275 | H. sapiens | LOC101930275 | uncharacterized<br>LOC101930275                                       |
| ENSG00000231964 | 102724323 | H. sapiens | LOC102724323 | uncharacterized<br>LOC102724323                                       |
| ENSG00000268650 | 102725254 | H. sapiens | LOC102725254 | uncharacterized<br>LOC102725254                                       |
| ENSG00000285280 | 105371664 | H. sapiens | LOC105371664 | uncharacterized<br>LOC105371664                                       |
| ENSG00000284607 | 105374988 | H. sapiens | LOC105374988 | uncharacterized<br>LOC105374988                                       |
| ENSG00000227131 | 105375050 | H. sapiens | LOC105375050 | uncharacterized<br>LOC105375050                                       |
| ENSG00000230190 | 105375556 | H. sapiens | LOC105375556 | uncharacterized<br>LOC105375556                                       |
| ENSG00000254775 | 105375861 | H. sapiens | LOC105375861 | uncharacterized<br>LOC105375861                                       |
| ENSG00000249184 | 105377488 | H. sapiens | LOC105377488 | uncharacterized<br>LOC105377488                                       |
| ENSG00000259392 | 107984761 | H. sapiens | LOC107984761 | microtubule-associated<br>proteins 1A/1B light chain<br>3 beta 2-like |
| ENSG00000276871 | 110467520 | H. sapiens | LOC110467520 | RNA, 5.8S ribosomal<br>pseudogene                                     |
| ENSG00000249944 | 112267949 | H. sapiens | LOC112267949 | COX assembly mitochondrial<br>protein homolog pseudogene              |
| ENSG00000250547 | 133332    | H. sapiens | LOC133332    | mitochondrial ribosomal<br>protein S5 pseudogene                      |
| ENSG00000237594 | 150051    | H. sapiens | LOC150051    | uncharacterized LOC150051                                             |
| ENSG00000249476 | 285638    | H. sapiens | LOC285638    | uncharacterized LOC285638                                             |
| ENSG00000261070 | 338694    | H. sapiens | LOC338694    | uncharacterized LOC338694                                             |
| ENSG00000224715 | 339685    | H. sapiens | LOC339685    | uncharacterized LOC339685                                             |
| ENSG00000253571 | 392180    | H. sapiens | LOC392180    | transcriptional adaptor 1<br>pseudogene                               |
| ENSG00000262587 | 554206    | H. sapiens | LOC554206    | leucine carboxyl<br>methyltransferase 1<br>pseudogene                 |
| ENSG00000248608 | 645433    | H. sapiens | LOC645433    | inositol-3-phosphate<br>synthase 1 pseudogene                         |
| ENSG00000254471 | 646112    | H. sapiens | LOC646112    | origin recognition complex<br>subunit 3 pseudogene                    |
| ENSG00000225884 | 729254    | H. sapiens | LOC729254    | hCG2045843                                                            |
| ENSG00000240477 | 730021    | H. sapiens | LOC730021    | eukaryotic translation<br>initiation factor 3<br>subunit J pseudogene |
| ENSG00000134013 | 4017      | H. sapiens | LOXL2        | lysyl oxidase like 2                                                  |
| ENSG00000175445 | 4023      | H. sapiens | LPL          | lipoprotein lipase                                                    |

|                 |           |            |           |                                                             |
|-----------------|-----------|------------|-----------|-------------------------------------------------------------|
| ENSG00000155530 | 136332    | H. sapiens | LRGUK     | leucine rich repeats and guanylate kinase domain containing |
| ENSG00000268324 | 83598     | H. sapiens | LRRC2-AS1 | LRRC2 antisense RNA 1                                       |
| ENSG00000173114 | 54674     | H. sapiens | LRRN3     | leucine rich repeat neuronal 3                              |
| ENSG00000248323 | 100505994 | H. sapiens | LUCAT1    | lung cancer associated transcript 1                         |
| ENSG00000261667 | 101928108 | H. sapiens | LY6L      | lymphocyte antigen 6 family member L                        |
| ENSG00000177383 | 64110     | H. sapiens | MAGEF1    | MAGE family member F1 mal, T cell                           |
| ENSG00000144063 | 7851      | H. sapiens | MALL      | differentiation protein like                                |
| ENSG00000145050 | 7873      | H. sapiens | MANF      | mesencephalic astrocyte derived neurotrophic factor         |
| ENSG00000034152 | 5606      | H. sapiens | MAP2K3    | mitogen-activated protein kinase kinase 3                   |
| ENSG00000135341 | 6885      | H. sapiens | MAP3K7    | mitogen-activated protein kinase kinase kinase 7            |
| ENSG00000071054 | 9448      | H. sapiens | MAP4K4    | mitogen-activated protein kinase kinase kinase kinase 4     |
| ENSG00000259438 | 112543478 | H. sapiens | MAPK6-DT  | MAPK6 divergent transcript                                  |
| ENSG00000119487 | 79109     | H. sapiens | MAPKAP1   | MAPK associated protein 1                                   |
| ENSG00000166974 | 10982     | H. sapiens | MAPRE2    | microtubule associated protein RP/EB family member 2        |
| ENSG00000248109 | 105378220 | H. sapiens | MARCOL    | MARCO like                                                  |
| ENSG00000228815 | 100631260 | H. sapiens | MARK2P13  | microtubule affinity regulating kinase 2 pseudogene 13      |
| ENSG00000271642 | 100421550 | H. sapiens | MARK3P1   | microtubule affinity regulating kinase 3 pseudogene 1       |
| ENSG00000180611 | 151963    | H. sapiens | MB21D2    | Mab-21 domain containing 2                                  |
| ENSG00000143797 | 129642    | H. sapiens | MBOAT2    | membrane bound O-acyltransferase domain containing 2        |
| ENSG00000101977 | 4168      | H. sapiens | MCF2      | MCF.2 cell line derived transforming sequence               |
| ENSG00000143384 | 4170      | H. sapiens | MCL1      | MCL1 apoptosis regulator, BCL2 family member                |
| ENSG00000082212 | 4200      | H. sapiens | ME2       | malic enzyme 2                                              |
| ENSG00000172878 | 254042    | H. sapiens | METAP1D   | methionyl aminopeptidase type 1D, mitochondrial             |
| ENSG00000165171 | 155368    | H. sapiens | METTL27   | methyltransferase like 27                                   |
| ENSG00000197614 | 8076      | H. sapiens | MFAP5     | microfibril associated protein 5                            |
| ENSG00000164877 | 79778     | H. sapiens | MICALL2   | MICAL like 2                                                |

|                 |           |            |           |                                     |
|-----------------|-----------|------------|-----------|-------------------------------------|
| ENSG00000148343 | 84895     | H. sapiens | MIGA2     | mitoguardin 2                       |
| ENSG00000106125 | 84182     | H. sapiens | MINDY4    | MINDY lysine 48<br>deubiquitinase 4 |
| ENSG00000221771 | 100302161 | H. sapiens | MIR1205   | microRNA 1205                       |
| ENSG00000283429 | 100422872 | H. sapiens | MIR1244-3 | microRNA 1244-3                     |
| ENSG00000283203 | 100302142 | H. sapiens | MIR1246   | microRNA 1246                       |
| ENSG00000251862 | 100616437 | H. sapiens | MIR1343   | microRNA 1343                       |
| ENSG00000207954 | 406929    | H. sapiens | MIR138-1  | microRNA 138-1                      |
| ENSG00000207814 | 406939    | H. sapiens | MIR147A   | microRNA 147a                       |
| ENSG00000199085 | 406940    | H. sapiens | MIR148A   | microRNA 148a                       |
| ENSG00000283218 | 100302131 | H. sapiens | MIR302F   | microRNA 302f                       |
| ENSG00000264358 | 100422947 | H. sapiens | MIR3122   | microRNA 3122                       |
| ENSG00000266761 | 100422889 | H. sapiens | MIR3194   | microRNA 3194                       |
| ENSG00000199104 | 442911    | H. sapiens | MIR346    | microRNA 346                        |
| ENSG00000264342 | 100500825 | H. sapiens | MIR3660   | microRNA 3660                       |
| ENSG00000263514 | 100500879 | H. sapiens | MIR3668   | microRNA 3668                       |
| ENSG00000266458 | 100422852 | H. sapiens | MIR4259   | microRNA 4259                       |
| ENSG00000265172 | 100422996 | H. sapiens | MIR4262   | microRNA 4262                       |
| ENSG00000265965 | 100423027 | H. sapiens | MIR4266   | microRNA 4266                       |
| ENSG00000283420 | 100422999 | H. sapiens | MIR4278   | microRNA 4278                       |
| ENSG00000265919 | 100422887 | H. sapiens | MIR4280   | microRNA 4280                       |
| ENSG00000263890 | 100422924 | H. sapiens | MIR4303   | microRNA 4303                       |
| ENSG00000265957 | 100422829 | H. sapiens | MIR4319   | microRNA 4319                       |
| ENSG00000283343 | 100422865 | H. sapiens | MIR4320   | microRNA 4320                       |
| ENSG00000264371 | 100616365 | H. sapiens | MIR4425   | microRNA 4425                       |
| ENSG00000266705 | 100616213 | H. sapiens | MIR4437   | microRNA 4437                       |
| ENSG00000276029 | 100616184 | H. sapiens | MIR4477A  | microRNA 4477a                      |
| ENSG00000266017 | 100616194 | H. sapiens | MIR4477B  | microRNA 4477b                      |
| ENSG00000283699 | 100616320 | H. sapiens | MIR4481   | microRNA 4481                       |
| ENSG00000264200 | 100616457 | H. sapiens | MIR4693   | microRNA 4693                       |
| ENSG00000266593 | 100616369 | H. sapiens | MIR4713   | microRNA 4713                       |
| ENSG00000265595 | 100616225 | H. sapiens | MIR4756   | microRNA 4756                       |
| ENSG00000264974 | 100616395 | H. sapiens | MIR4789   | microRNA 4789                       |
| ENSG00000265699 | 100616339 | H. sapiens | MIR548AE2 | microRNA 548ae-2                    |
| ENSG00000212036 | 102465854 | H. sapiens | MIR548BA  | microRNA 548ba                      |
| ENSG00000221442 | 100313895 | H. sapiens | MIR548F4  | microRNA 548f-4                     |
| ENSG00000263381 | 100847089 | H. sapiens | MIR5584   | microRNA 5584                       |
| ENSG00000283616 | 100847034 | H. sapiens | MIR5683   | microRNA 5683                       |
| ENSG00000266099 | 100847031 | H. sapiens | MIR5700   | microRNA 5700                       |
| ENSG00000263981 | 100847027 | H. sapiens | MIR5705   | microRNA 5705                       |
| ENSG00000207637 | 693180    | H. sapiens | MIR595    | microRNA 595                        |
| ENSG00000274115 | 102466518 | H. sapiens | MIR6081   | microRNA 6081                       |
| ENSG00000276176 | 102466104 | H. sapiens | MIR6090   | microRNA 6090                       |
| ENSG00000207622 | 693204    | H. sapiens | MIR619    | microRNA 619                        |
| ENSG00000207965 | 693214    | H. sapiens | MIR629    | microRNA 629                        |
| ENSG00000284250 | 102466864 | H. sapiens | MIR6516   | microRNA 6516                       |
| ENSG00000284197 | 724028    | H. sapiens | MIR658    | microRNA 658                        |
| ENSG00000207574 | 724031    | H. sapiens | MIR661    | microRNA 661                        |
| ENSG00000275101 | 102466983 | H. sapiens | MIR6766   | microRNA 6766                       |
| ENSG00000274969 | 102465462 | H. sapiens | MIR6771   | microRNA 6771                       |
| ENSG00000278420 | 102465491 | H. sapiens | MIR6819   | microRNA 6819                       |

|                 |           |            |              |                                                                                                                   |
|-----------------|-----------|------------|--------------|-------------------------------------------------------------------------------------------------------------------|
| ENSG00000283789 | 102465836 | H. sapiens | MIR7846      | microRNA 7846                                                                                                     |
| ENSG00000273882 | 102465868 | H. sapiens | MIR8066      | microRNA 8066                                                                                                     |
| ENSG00000216192 | 100126320 | H. sapiens | MIR920       | microRNA 920                                                                                                      |
| ENSG00000011143 | 54903     | H. sapiens | MKS1         | MKS transition zone complex subunit 1                                                                             |
| ENSG00000137674 | 9313      | H. sapiens | MMP20        | matrix metalloproteinase 20                                                                                       |
| ENSG00000138722 | 22915     | H. sapiens | MMRN1        | multimerin 1                                                                                                      |
| ENSG00000163563 | 4332      | H. sapiens | MNDA         | myeloid cell nuclear differentiation antigen                                                                      |
| ENSG00000240268 | 100289017 | H. sapiens | MOXD2P       | monooxygenase DBH like 2, pseudogene                                                                              |
| ENSG00000135324 | 112609    | H. sapiens | MRAP2        | melanocortin 2 receptor accessory protein 2                                                                       |
| ENSG00000183695 | 117194    | H. sapiens | MRGPRX2      | MAS related GPR family member X2                                                                                  |
| ENSG00000132313 | 51318     | H. sapiens | MRPL35       | mitochondrial ribosomal protein L35                                                                               |
| ENSG00000175581 | 51642     | H. sapiens | MRPL48       | mitochondrial ribosomal protein L48                                                                               |
| ENSG00000253814 | 347704    | H. sapiens | MRPS36P3     | mitochondrial ribosomal protein S36 pseudogene 3                                                                  |
| ENSG00000214782 | 728588    | H. sapiens | MS4A18       | membrane spanning 4- domains A18                                                                                  |
| ENSG00000283601 | 116435280 | H. sapiens | MS4A19P      | membrane spanning 4- domains A19, pseudogene                                                                      |
| ENSG00000151379 | 343930    | H. sapiens | MSGN1        | mesogenin 1                                                                                                       |
| ENSG00000147065 | 4478      | H. sapiens | MSN          | moesin                                                                                                            |
| ENSG00000038945 | 4481      | H. sapiens | MSR1         | macrophage scavenger receptor 1                                                                                   |
| ENSG00000125148 | 4502      | H. sapiens | MT2A         | metallothionein 2A                                                                                                |
| ENSG00000137409 | 23787     | H. sapiens | MTCH1        | mitochondrial carrier 1                                                                                           |
| ENSG00000228898 | 107075173 | H. sapiens | MTCO1P43     | MT-CO1 pseudogene 43                                                                                              |
| ENSG00000236007 | 107075175 | H. sapiens | MTCO1P46     | MT-CO1 pseudogene 46                                                                                              |
| ENSG00000229690 | 140909    | H. sapiens | MTCO2P1      | MT-CO2 pseudogene 1                                                                                               |
| ENSG00000240951 | 107075266 | H. sapiens | MTCO2P6      | MT-CO2 pseudogene 6                                                                                               |
| ENSG00000248282 | 109729154 | H. sapiens | MTCYBP44     | MT-CYB pseudogene 44                                                                                              |
| ENSG00000217169 | 106480237 | H. sapiens | MTHFD2P2     | methylenetetrahydrofolate dehydrogenase (NADP+ dependent) 2, methenyltetrahydrofolate cyclohydrolase pseudogene 2 |
| ENSG00000014914 | 10903     | H. sapiens | MTMR11       | myotubularin related protein 11                                                                                   |
| ENSG00000253970 | 100873179 | H. sapiens | MTND2P7      | MT-ND2 pseudogene 7                                                                                               |
| ENSG00000130349 | 51250     | H. sapiens | MTRES1       | mitochondrial transcription rescue factor 1                                                                       |
| ENSG00000255823 | 100463486 | H. sapiens | MTRNR2L8     | MT-RNR2 like 8                                                                                                    |
| ENSG00000236242 | 100885782 | H. sapiens | MYO16-AS1    | MYO16 antisense RNA 1                                                                                             |
| ENSG00000230292 | 100862679 | H. sapiens | NAALADL2-AS3 | NAALADL2 antisense RNA 3                                                                                          |

|                 |           |            |           |                                                        |
|-----------------|-----------|------------|-----------|--------------------------------------------------------|
| ENSG00000196531 | 4666      | H. sapiens | NACA      | nascent polypeptide associated complex subunit alpha   |
| ENSG00000249229 | 100132712 | H. sapiens | NAMPTP2   | nicotinamide phosphoribosyltransferase pseudogene 2    |
| ENSG00000121152 | 23397     | H. sapiens | NCAPH     | non-SMC condensin I complex subunit H                  |
| ENSG00000166579 | 81565     | H. sapiens | NDEL1     | nudE neurodevelopment protein 1 like 1                 |
| ENSG00000237406 | 266625    | H. sapiens | NDUFA9P1  | NADH:ubiquinone oxidoreductase subunit A9 pseudogene 1 |
| ENSG00000251306 | 100132036 | H. sapiens | NDUFB4P2  | NADH:ubiquinone oxidoreductase subunit B4 pseudogene 2 |
| ENSG00000178127 | 4729      | H. sapiens | NDUFV2    | NADH:ubiquinone oxidoreductase core subunit V2         |
| ENSG00000245532 | 283131    | H. sapiens | NEAT1     | nuclear paraspeckle assembly transcript 1              |
| ENSG00000119408 | 10783     | H. sapiens | NEK6      | NIMA related kinase 6                                  |
| ENSG00000117691 | 29937     | H. sapiens | NENF      | neudesin neurotrophic factor                           |
| ENSG00000101096 | 4773      | H. sapiens | NFATC2    | nuclear factor of activated T cells 2                  |
| ENSG00000237853 | 645030    | H. sapiens | NFIA-AS1  | NFIA antisense RNA 1                                   |
| ENSG00000146729 | 2631      | H. sapiens | NIPSNAP2  | nipsnap homolog 2                                      |
| ENSG00000228213 | 100874010 | H. sapiens | NLGN1-AS1 | NLGN1 antisense RNA 1                                  |
| ENSG00000179873 | 204801    | H. sapiens | NLRP11    | NLR family pyrin domain containing 11                  |
| ENSG00000132911 | 56923     | H. sapiens | NMUR2     | neuromedin U receptor 2                                |
| ENSG00000198929 | 9722      | H. sapiens | NOS1AP    | nitric oxide synthase 1 adaptor protein                |
| ENSG00000185823 | 23742     | H. sapiens | NPAP1     | nuclear pore associated protein 1                      |
| ENSG00000056291 | 10886     | H. sapiens | NPFFR2    | neuropeptide FF receptor 2                             |
| ENSG00000214285 | 594857    | H. sapiens | NPS       | neuropeptide S                                         |
| ENSG00000122585 | 4852      | H. sapiens | NPY       | neuropeptide Y                                         |
| ENSG00000112333 | 7101      | H. sapiens | NR2E1     | nuclear receptor subfamily 2 group E member 1          |
| ENSG00000154146 | 4900      | H. sapiens | NRGN      | neurogranin                                            |
| ENSG00000118257 | 8828      | H. sapiens | NRP2      | neuropilin 2                                           |
| ENSG00000103274 | 4682      | H. sapiens | NUBP1     | nucleotide binding protein 1                           |
| ENSG00000163002 | 129401    | H. sapiens | NUP35     | nucleoporin 35                                         |
| ENSG00000153989 | 116150    | H. sapiens | NUS1      | NUS1 dehydrodolichyl diphosphate synthase subunit      |
| ENSG00000130045 | 158046    | H. sapiens | NXNL2     | nucleoredoxin like 2                                   |

|                 |           |            |           |                                                               |
|-----------------|-----------|------------|-----------|---------------------------------------------------------------|
| ENSG00000137634 | 54827     | H. sapiens | NXPE4     | neurexophilin and PC-esterase domain family member 4          |
| ENSG00000174792 | 152816    | H. sapiens | ODAPH     | odontogenesis associated phosphoprotein                       |
| ENSG00000105953 | 4967      | H. sapiens | OGDH      | oxoglutarate dehydrogenase                                    |
| ENSG00000180409 | 81487     | H. sapiens | OR10AA1P  | olfactory receptor family 10 subfamily AA member 1 pseudogene |
| ENSG00000251686 | 343409    | H. sapiens | OR10J8P   | olfactory receptor family 10 subfamily J member 8 pseudogene  |
| ENSG00000198967 | 128368    | H. sapiens | OR10Z1    | olfactory receptor family 10 subfamily Z member 1             |
| ENSG00000127780 | 8388      | H. sapiens | OR1E2     | olfactory receptor family 1 subfamily E member 2              |
| ENSG00000244623 | 81392     | H. sapiens | OR2AE1    | olfactory receptor family 2 subfamily AE member 1             |
| ENSG00000181903 | 219432    | H. sapiens | OR4C6     | olfactory receptor family 4 subfamily C member 6              |
| ENSG00000167332 | 81285     | H. sapiens | OR51E2    | olfactory receptor family 51 subfamily E member 2             |
| ENSG00000172324 | 219981    | H. sapiens | OR5A2     | olfactory receptor family 5 subfamily A member 2              |
| ENSG00000181518 | 338662    | H. sapiens | OR8D4     | olfactory receptor family 8 subfamily D member 4              |
| ENSG00000229314 | 5004      | H. sapiens | ORM1      | orosomucoid 1                                                 |
| ENSG00000130703 | 9885      | H. sapiens | OSBPL2    | oxysterol binding protein like 2                              |
| ENSG00000070882 | 26031     | H. sapiens | OSBPL3    | oxysterol binding protein like 3                              |
| ENSG00000256285 | 106480232 | H. sapiens | OSBPL9P5  | oxysterol binding protein like 9 pseudogene 5                 |
| ENSG00000182447 | 131149    | H. sapiens | OTOL1     | otolin 1                                                      |
| ENSG00000187950 | 341350    | H. sapiens | OVCH1     | ovochoymase 1                                                 |
| ENSG00000248668 | 100874002 | H. sapiens | OXCT1-AS1 | OXCT1 antisense RNA 1                                         |
| ENSG00000101104 | 80336     | H. sapiens | PABPC1L   | poly(A) binding protein cytoplasmic 1 like                    |
| ENSG00000124507 | 29993     | H. sapiens | PAC SIN1  | protein kinase C and casein kinase substrate in neurons 1     |
| ENSG00000145730 | 5066      | H. sapiens | PAM       | peptidylglycine alpha-amidating monooxygenase                 |
| ENSG00000073150 | 56666     | H. sapiens | PANX2     | pannexin 2                                                    |
| ENSG00000138801 | 9061      | H. sapiens | PAPSS1    | 3'-phosphoadenosine 5'-phosphosulfate synthase 1              |
| ENSG00000116117 | 117583    | H. sapiens | PARD3B    | par-3 family cell polarity regulator beta                     |
| ENSG00000173200 | 165631    | H. sapiens | PARP15    | poly(ADP-ribose) polymerase family member 15                  |

|                 |           |            |             |                                                               |
|-----------------|-----------|------------|-------------|---------------------------------------------------------------|
| ENSG00000265369 | 728606    | H. sapiens | PCAT18      | prostate cancer associated transcript 18                      |
| ENSG00000156453 | 5097      | H. sapiens | PCDH1       | protocadherin 1                                               |
| ENSG00000081154 | 57092     | H. sapiens | PCNP        | PEST proteolytic signal containing nuclear protein            |
| ENSG00000135749 | 80003     | H. sapiens | PCNX2       | pecanex 2                                                     |
| ENSG00000183036 | 5121      | H. sapiens | PCP4        | Purkinje cell protein 4 phosphate                             |
| ENSG00000161217 | 5130      | H. sapiens | PCYT1A      | cytidylyltransferase 1, choline, alpha                        |
| ENSG00000229739 | 102724919 | H. sapiens | PDC-AS1     | PDC antisense RNA 1                                           |
| ENSG00000105185 | 9141      | H. sapiens | PDCD5       | programmed cell death 5                                       |
| ENSG00000170248 | 10015     | H. sapiens | PDCD6IP     | programmed cell death 6 interacting protein                   |
| ENSG00000065989 | 5141      | H. sapiens | PDE4A       | phosphodiesterase 4A                                          |
| ENSG00000184588 | 5142      | H. sapiens | PDE4B       | phosphodiesterase 4B                                          |
| ENSG00000227466 | 101927139 | H. sapiens | PDE4B-AS1   | PDE4B antisense RNA 1                                         |
| ENSG00000110435 | 8050      | H. sapiens | PDHX        | pyruvate dehydrogenase complex component X                    |
| ENSG00000162493 | 10630     | H. sapiens | PDPN        | podoplanin                                                    |
| ENSG00000242265 | 23089     | H. sapiens | PEG10       | paternally expressed 10                                       |
| ENSG00000215193 | 55670     | H. sapiens | PEX26       | peroxisomal biogenesis factor 26                              |
| ENSG00000170525 | 5209      | H. sapiens | PFKFB3      | 6-phosphofructo-2-kinase/fructose-2,6-biphosphatase 3         |
| ENSG00000197121 | 80055     | H. sapiens | PGAP1       | post-GPI attachment to proteins inositol deacylase 1          |
| ENSG00000238194 | 100506384 | H. sapiens | PHACTR3-AS1 | PHACTR3 antisense RNA 1                                       |
| ENSG00000119403 | 26147     | H. sapiens | PHF19       | PHD finger protein 19                                         |
| ENSG00000006576 | 57157     | H. sapiens | PHTF2       | putative homeodomain transcription factor 2                   |
| ENSG00000228839 | 101929760 | H. sapiens | PIK3IP1-DT  | PIK3IP1 divergent transcript                                  |
| ENSG00000254266 | 101927003 | H. sapiens | PKIA-AS1    | PKIA antisense RNA 1                                          |
| ENSG00000143627 | 5313      | H. sapiens | PKLR        | pyruvate kinase L/R                                           |
| ENSG00000057294 | 5318      | H. sapiens | PKP2        | plakophilin 2                                                 |
| ENSG00000117215 | 26279     | H. sapiens | PLA2G2D     | phospholipase A2 group IID                                    |
| ENSG00000104368 | 5327      | H. sapiens | PLAT        | plasminogen activator, tissue type                            |
| ENSG00000101333 | 5332      | H. sapiens | PLCB4       | phospholipase C beta 4                                        |
| ENSG00000115896 | 5334      | H. sapiens | PLCL1       | phospholipase C like 1 (inactive)                             |
| ENSG00000075651 | 5337      | H. sapiens | PLD1        | phospholipase D1                                              |
| ENSG00000140464 | 5371      | H. sapiens | PML         | PML nuclear body scaffold                                     |
| ENSG00000078319 | 5379      | H. sapiens | PMS2P1      | PMS1 homolog 2, mismatch repair system component pseudogene 1 |
| ENSG00000070501 | 5423      | H. sapiens | POLB        | DNA polymerase beta                                           |
| ENSG00000122008 | 51426     | H. sapiens | POLK        | DNA polymerase kappa                                          |

|                 |           |            |           |                                                           |
|-----------------|-----------|------------|-----------|-----------------------------------------------------------|
| ENSG00000167390 | 651452    | H. sapiens | POM121L3P | POM121 transmembrane nucleoporin like 3, pseudogene       |
| ENSG00000279261 | 100130249 | H. sapiens | PP2672    | uncharacterized LOC100130249                              |
| ENSG00000138621 | 60490     | H. sapiens | PPCDC     | phosphopantothenoylecysteine decarboxylase                |
| ENSG00000110841 | 8496      | H. sapiens | PPFIBP1   | PPFIA binding protein 1                                   |
| ENSG00000271131 | 111082968 | H. sapiens | PPIAP75   | peptidylprolyl isomerase A pseudogene 75                  |
| ENSG00000250484 | 111082983 | H. sapiens | PPIAP76   | peptidylprolyl isomerase A pseudogene 76                  |
| ENSG00000224986 | 5512      | H. sapiens | PPP1R8P1  | protein phosphatase 1 regulatory subunit 8 pseudogene 1   |
| ENSG00000137509 | 5547      | H. sapiens | PRCP      | prolylcarboxypeptidase                                    |
| ENSG00000112238 | 59336     | H. sapiens | PRDM13    | PR/SET domain 13                                          |
| ENSG00000253729 | 5591      | H. sapiens | PRKDC     | protein kinase, DNA-activated, catalytic subunit          |
| ENSG00000138669 | 5593      | H. sapiens | PRKG2     | protein kinase cGMP-dependent 2                           |
| ENSG00000282961 | 101867536 | H. sapiens | PRNCR1    | prostate cancer associated non-coding RNA 1               |
| ENSG00000180259 | 149830    | H. sapiens | PRNT      | prion locus lncRNA, testis expressed                      |
| ENSG00000264685 | 100422496 | H. sapiens | PRPF19P1  | PRPF19 pseudogene 1                                       |
| ENSG00000226847 | 100861436 | H. sapiens | PRPS1P1   | phosphoribosyl pyrophosphate synthetase 1 pseudogene 1    |
| ENSG00000184838 | 51334     | H. sapiens | PRR16     | proline rich 16                                           |
| ENSG00000283526 | 642515    | H. sapiens | PRRT1B    | proline rich transmembrane protein 1B                     |
| ENSG00000146250 | 167681    | H. sapiens | PRSS35    | serine protease 35                                        |
| ENSG00000106588 | 5683      | H. sapiens | PSMA2     | proteasome 20S subunit alpha 2                            |
| ENSG00000217385 | 442153    | H. sapiens | PSMC1P11  | proteasome 26S subunit, ATPase 1 pseudogene 11            |
| ENSG00000105894 | 5764      | H. sapiens | PTN       | pleiotrophin                                              |
| ENSG00000173482 | 5797      | H. sapiens | PTPRM     | protein tyrosine phosphatase receptor type M              |
| ENSG00000163661 | 5806      | H. sapiens | PTX3      | pentraxin 3                                               |
| ENSG00000241945 | 5822      | H. sapiens | PWP2      | PWP2 small subunit                                        |
| ENSG00000163564 | 149628    | H. sapiens | PYHIN1    | processome component pyrin and HIN domain family member 1 |
| ENSG00000041353 | 5874      | H. sapiens | RAB27B    | RAB27B, member RAS oncogene family                        |
| ENSG00000152932 | 115827    | H. sapiens | RAB3C     | RAB3C, member RAS oncogene family                         |



|                 |           |            |           |                                                                                            |
|-----------------|-----------|------------|-----------|--------------------------------------------------------------------------------------------|
| ENSG00000188060 | 115273    | H. sapiens | RAB42     | RAB42, member RAS oncogene family                                                          |
| ENSG00000236101 | 100874390 | H. sapiens | RAC1P7    | Rac family small GTPase 1 pseudogene 7                                                     |
| ENSG00000236570 | 131185    | H. sapiens | RAD23BP1  | RAD23B pseudogene 1                                                                        |
| ENSG00000136828 | 9649      | H. sapiens | RALGPS1   | Ral GEF with PH domain and SH3 binding motif 1                                             |
| ENSG00000164188 | 202151    | H. sapiens | RANBP3L   | RAN binding protein 3 like Ras association (RalGDS/AF-6) and pleckstrin homology domains 1 |
| ENSG00000173166 | 65059     | H. sapiens | RAPH1     | retinoic acid receptor alpha                                                               |
| ENSG00000131759 | 5914      | H. sapiens | RARA      | RB binding protein 8, endonuclease                                                         |
| ENSG00000101773 | 5932      | H. sapiens | RBBP8     | RBBP8 pseudogene 1                                                                         |
| ENSG00000230399 | 100420552 | H. sapiens | RBBP8P1   | recombination signal binding protein for immunoglobulin kappa J region                     |
| ENSG00000168214 | 3516      | H. sapiens | RBPJ      | RDM1 pseudogene 5                                                                          |
| ENSG00000263818 | 100131347 | H. sapiens | RDM1P5    | replication initiator 1                                                                    |
| ENSG00000214022 | 29803     | H. sapiens | REPIN1    | RALBP1 associated Eps domain containing 2                                                  |
| ENSG00000169891 | 9185      | H. sapiens | REPS2     | regulatory factor X1                                                                       |
| ENSG00000132005 | 5989      | H. sapiens | RFX1      | regulatory factor X4                                                                       |
| ENSG00000111783 | 5992      | H. sapiens | RFX4      | regulator of G protein signaling 18                                                        |
| ENSG00000150681 | 64407     | H. sapiens | RGS18     | rhomboid 5 homolog 2 regulator of                                                          |
| ENSG00000129667 | 79651     | H. sapiens | RHBDF2    | hemoglobinization and erythroid cell expansion                                             |
| ENSG00000263961 | 440712    | H. sapiens | RHEX      | Rho related BTB domain containing 3                                                        |
| ENSG00000164292 | 22836     | H. sapiens | RHOBTB3   | RPTOR independent companion of MTOR complex 2                                              |
| ENSG00000164327 | 253260    | H. sapiens | RICTOR    | regulating synaptic membrane exocytosis 1                                                  |
| ENSG00000079841 | 22999     | H. sapiens | RIMS1     | RN7SK pseudogene 115                                                                       |
| ENSG00000200047 | 106479146 | H. sapiens | RN7SKP115 | RN7SK pseudogene 135                                                                       |
| ENSG00000252358 | 106480875 | H. sapiens | RN7SKP135 | RN7SK pseudogene 182                                                                       |
| ENSG00000222704 | 106479177 | H. sapiens | RN7SKP182 | RN7SK pseudogene 183                                                                       |
| ENSG00000252978 | 106480889 | H. sapiens | RN7SKP183 | RN7SK pseudogene 195                                                                       |
| ENSG00000252396 | 106481816 | H. sapiens | RN7SKP195 | RN7SK pseudogene 226                                                                       |
| ENSG00000201782 | 106480903 | H. sapiens | RN7SKP226 | RN7SK pseudogene 27                                                                        |
| ENSG00000222616 | 106480841 | H. sapiens | RN7SKP27  | RN7SK pseudogene 29                                                                        |
| ENSG00000222889 | 106480457 | H. sapiens | RN7SKP29  | RN7SK pseudogene 295                                                                       |
| ENSG00000253073 | 106480924 | H. sapiens | RN7SKP295 | RN7SK pseudogene 40                                                                        |
| ENSG00000253020 | 106479113 | H. sapiens | RN7SKP40  | RN7SK pseudogene 52                                                                        |
| ENSG00000252028 | 106479118 | H. sapiens | RN7SKP52  |                                                                                            |

|                 |           |            |           |                                       |
|-----------------|-----------|------------|-----------|---------------------------------------|
| ENSG00000223269 | 106480849 | H. sapiens | RN7SKP53  | RN7SK pseudogene 53                   |
| ENSG00000243541 | 106480949 | H. sapiens | RN7SL104P | RNA, 7SL, cytoplasmic 104, pseudogene |
| ENSG00000243546 | 106480950 | H. sapiens | RN7SL108P | RNA, 7SL, cytoplasmic 108, pseudogene |
| ENSG00000240474 | 106480488 | H. sapiens | RN7SL116P | RNA, 7SL, cytoplasmic 116, pseudogene |
| ENSG00000243398 | 106480959 | H. sapiens | RN7SL141P | RNA, 7SL, cytoplasmic 141, pseudogene |
| ENSG00000239679 | 106480493 | H. sapiens | RN7SL193P | RNA, 7SL, cytoplasmic 193, pseudogene |
| ENSG00000264916 | 106479306 | H. sapiens | RN7SL230P | RNA, 7SL, cytoplasmic 230, pseudogene |
| ENSG00000241652 | 106479314 | H. sapiens | RN7SL253P | RNA, 7SL, cytoplasmic 253, pseudogene |
| ENSG00000242121 | 106481833 | H. sapiens | RN7SL267P | RNA, 7SL, cytoplasmic 267, pseudogene |
| ENSG00000243845 | 106479235 | H. sapiens | RN7SL30P  | RNA, 7SL, cytoplasmic 30, pseudogene  |
| ENSG00000242989 | 106479345 | H. sapiens | RN7SL332P | RNA, 7SL, cytoplasmic 332, pseudogene |
| ENSG00000242482 | 106480506 | H. sapiens | RN7SL392P | RNA, 7SL, cytoplasmic 392, pseudogene |
| ENSG00000239396 | 106481036 | H. sapiens | RN7SL414P | RNA, 7SL, cytoplasmic 414, pseudogene |
| ENSG00000241229 | 106480510 | H. sapiens | RN7SL443P | RNA, 7SL, cytoplasmic 443, pseudogene |
| ENSG00000243871 | 106481055 | H. sapiens | RN7SL487P | RNA, 7SL, cytoplasmic 487, pseudogene |
| ENSG00000242985 | 106479243 | H. sapiens | RN7SL50P  | RNA, 7SL, cytoplasmic 50, pseudogene  |
| ENSG00000243075 | 106479412 | H. sapiens | RN7SL519P | RNA, 7SL, cytoplasmic 519, pseudogene |
| ENSG00000264615 | 106481851 | H. sapiens | RN7SL592P | RNA, 7SL, cytoplasmic 592, pseudogene |
| ENSG00000243420 | 106479490 | H. sapiens | RN7SL734P | RNA, 7SL, cytoplasmic 734, pseudogene |
| ENSG00000277506 | 106479513 | H. sapiens | RN7SL802P | RNA, 7SL, cytoplasmic 802, pseudogene |
| ENSG00000263595 | 106479522 | H. sapiens | RN7SL823P | RNA, 7SL, cytoplasmic 823, pseudogene |
| ENSG00000243383 | 106479256 | H. sapiens | RN7SL89P  | RNA, 7SL, cytoplasmic 89, pseudogene  |
| ENSG00000223318 | 100873381 | H. sapiens | RNA5SP111 | RNA, 5S ribosomal pseudogene 111      |
| ENSG00000222838 | 100873404 | H. sapiens | RNA5SP136 | RNA, 5S ribosomal pseudogene 136      |
| ENSG00000202502 | 100873417 | H. sapiens | RNA5SP151 | RNA, 5S ribosomal pseudogene 151      |
| ENSG00000252002 | 100873420 | H. sapiens | RNA5SP154 | RNA, 5S ribosomal pseudogene 154      |

|                 |           |            |           |                                      |
|-----------------|-----------|------------|-----------|--------------------------------------|
| ENSG00000222230 | 100873424 | H. sapiens | RNA5SP158 | RNA, 5S ribosomal pseudogene 158     |
| ENSG00000252342 | 100873429 | H. sapiens | RNA5SP164 | RNA, 5S ribosomal pseudogene 164     |
| ENSG00000223003 | 100873446 | H. sapiens | RNA5SP184 | RNA, 5S ribosomal pseudogene 184     |
| ENSG00000222285 | 100873455 | H. sapiens | RNA5SP193 | RNA, 5S ribosomal pseudogene 193     |
| ENSG00000201523 | 100873466 | H. sapiens | RNA5SP205 | RNA, 5S ribosomal pseudogene 205     |
| ENSG00000212333 | 100873473 | H. sapiens | RNA5SP213 | RNA, 5S ribosomal pseudogene 213     |
| ENSG00000200058 | 100873478 | H. sapiens | RNA5SP218 | RNA, 5S ribosomal pseudogene 218     |
| ENSG00000252041 | 100873486 | H. sapiens | RNA5SP228 | RNA, 5S ribosomal pseudogene 228     |
| ENSG00000212308 | 100873278 | H. sapiens | RNA5SP23  | RNA, 5S ribosomal pseudogene 23      |
| ENSG00000222346 | 100873495 | H. sapiens | RNA5SP237 | RNA, 5S ribosomal pseudogene 237     |
| ENSG00000212628 | 100873499 | H. sapiens | RNA5SP241 | RNA, 5S ribosomal pseudogene 241     |
| ENSG00000222546 | 100873507 | H. sapiens | RNA5SP251 | RNA, 5S ribosomal pseudogene 251     |
| ENSG00000201763 | 100873520 | H. sapiens | RNA5SP267 | RNA, 5S ribosomal pseudogene 267     |
| ENSG00000252428 | 100873538 | H. sapiens | RNA5SP285 | RNA, 5S ribosomal pseudogene 285     |
| ENSG00000212454 | 100873539 | H. sapiens | RNA5SP286 | RNA, 5S ribosomal pseudogene 286     |
| ENSG00000252496 | 100873365 | H. sapiens | RNA5SP33  | RNA, 5S ribosomal pseudogene 33      |
| ENSG00000200687 | 106479007 | H. sapiens | RNA5SP335 | RNA, 5S ribosomal pseudogene 335     |
| ENSG00000201059 | 100873599 | H. sapiens | RNA5SP336 | RNA, 5S ribosomal pseudogene 336     |
| ENSG00000202290 | 100873369 | H. sapiens | RNA5SP37  | RNA, 5S ribosomal pseudogene 37      |
| ENSG00000252260 | 100873705 | H. sapiens | RNA5SP461 | RNA, 5S ribosomal pseudogene 461     |
| ENSG00000199806 | 100873733 | H. sapiens | RNA5SP491 | RNA, 5S ribosomal pseudogene 491     |
| ENSG00000201285 | 111644143 | H. sapiens | RNA5SP524 | RNA, 5S ribosomal pseudogene 524     |
| ENSG00000170153 | 57484     | H. sapiens | RNF150    | ring finger protein 150              |
| ENSG00000165188 | 138065    | H. sapiens | RNF183    | ring finger protein 183              |
| ENSG00000138942 | 91445     | H. sapiens | RNF185    | ring finger protein 185              |
| ENSG00000271739 | 106480154 | H. sapiens | RNU1-29P  | RNA, U1 small nuclear 29, pseudogene |
| ENSG00000207056 | 106481604 | H. sapiens | RNU1-8P   | RNA, U1 small nuclear 8, pseudogene  |

|                 |           |            |            |                                                    |
|-----------------|-----------|------------|------------|----------------------------------------------------|
| ENSG00000201616 | 106480179 | H. sapiens | RNU1-91P   | RNA, U1 small nuclear 91, pseudogene               |
| ENSG00000222357 | 106481640 | H. sapiens | RNU2-20P   | RNA, U2 small nuclear 20, pseudogene               |
| ENSG00000251994 | 106481642 | H. sapiens | RNU2-27P   | RNA, U2 small nuclear 27, pseudogene               |
| ENSG00000252066 | 106480220 | H. sapiens | RNU2-53P   | RNA, U2 small nuclear 53, pseudogene               |
| ENSG00000202429 | 106479580 | H. sapiens | RNU4-48P   | RNA, U4 small nuclear 48, pseudogene               |
| ENSG00000206936 | 106481188 | H. sapiens | RNU4-52P   | RNA, U4 small nuclear 52, pseudogene               |
| ENSG00000223152 | 106479599 | H. sapiens | RNU4-88P   | RNA, U4 small nuclear 88, pseudogene               |
| ENSG00000264229 | 100151683 | H. sapiens | RNU4ATAC   | RNA, U4atac small nuclear (U12-dependent splicing) |
| ENSG00000199377 | 26828     | H. sapiens | RNU5F-1    | RNA, U5F small nuclear 1                           |
| ENSG00000200637 | 100873866 | H. sapiens | RNU5F-3P   | RNA, U5F small nuclear 3, pseudogene               |
| ENSG00000252414 | 106481208 | H. sapiens | RNU6-100P  | RNA, U6 small nuclear 100, pseudogene              |
| ENSG00000238680 | 106481508 | H. sapiens | RNU6-1037P | RNA, U6 small nuclear 1037, pseudogene             |
| ENSG00000207267 | 106480636 | H. sapiens | RNU6-1081P | RNA, U6 small nuclear 1081, pseudogene             |
| ENSG00000252935 | 106481565 | H. sapiens | RNU6-1220P | RNA, U6 small nuclear 1220, pseudogene             |
| ENSG00000252994 | 106480104 | H. sapiens | RNU6-1231P | RNA, U6 small nuclear 1231, pseudogene             |
| ENSG00000206618 | 106480117 | H. sapiens | RNU6-1264P | RNA, U6 small nuclear 1264, pseudogene             |
| ENSG00000252151 | 106481579 | H. sapiens | RNU6-1265P | RNA, U6 small nuclear 1265, pseudogene             |
| ENSG00000206703 | 106481217 | H. sapiens | RNU6-128P  | RNA, U6 small nuclear 128, pseudogene              |
| ENSG00000202206 | 106481229 | H. sapiens | RNU6-169P  | RNA, U6 small nuclear 169, pseudogene              |
| ENSG00000206866 | 106481880 | H. sapiens | RNU6-187P  | RNA, U6 small nuclear 187, pseudogene              |
| ENSG00000252104 | 106479651 | H. sapiens | RNU6-191P  | RNA, U6 small nuclear 191, pseudogene              |
| ENSG00000252556 | 106479680 | H. sapiens | RNU6-256P  | RNA, U6 small nuclear 256, pseudogene              |
| ENSG00000200963 | 106479695 | H. sapiens | RNU6-289P  | RNA, U6 small nuclear 289, pseudogene              |
| ENSG00000252126 | 106480569 | H. sapiens | RNU6-313P  | RNA, U6 small nuclear 313, pseudogene              |
| ENSG00000199536 | 106479707 | H. sapiens | RNU6-315P  | RNA, U6 small nuclear 315, pseudogene              |
| ENSG00000202239 | 106481303 | H. sapiens | RNU6-396P  | RNA, U6 small nuclear 396, pseudogene              |

|                 |           |            |           |                                       |
|-----------------|-----------|------------|-----------|---------------------------------------|
| ENSG00000206762 | 106481310 | H. sapiens | RNU6-418P | RNA, U6 small nuclear 418, pseudogene |
| ENSG00000207312 | 106479755 | H. sapiens | RNU6-429P | RNA, U6 small nuclear 429, pseudogene |
| ENSG00000200086 | 106481315 | H. sapiens | RNU6-433P | RNA, U6 small nuclear 433, pseudogene |
| ENSG00000202431 | 106479760 | H. sapiens | RNU6-438P | RNA, U6 small nuclear 438, pseudogene |
| ENSG00000252861 | 106479764 | H. sapiens | RNU6-448P | RNA, U6 small nuclear 448, pseudogene |
| ENSG00000207200 | 100873759 | H. sapiens | RNU6-45P  | RNA, U6 small nuclear 45, pseudogene  |
| ENSG00000206970 | 106481329 | H. sapiens | RNU6-474P | RNA, U6 small nuclear 474, pseudogene |
| ENSG00000251727 | 106479782 | H. sapiens | RNU6-488P | RNA, U6 small nuclear 488, pseudogene |
| ENSG00000206932 | 106478914 | H. sapiens | RNU6-4P   | RNA, U6 small nuclear 4, pseudogene   |
| ENSG00000207090 | 106479795 | H. sapiens | RNU6-517P | RNA, U6 small nuclear 517, pseudogene |
| ENSG00000200146 | 106481353 | H. sapiens | RNU6-544P | RNA, U6 small nuclear 544, pseudogene |
| ENSG00000252688 | 106481364 | H. sapiens | RNU6-579P | RNA, U6 small nuclear 579, pseudogene |
| ENSG00000206999 | 106479841 | H. sapiens | RNU6-622P | RNA, U6 small nuclear 622, pseudogene |
| ENSG00000200563 | 106479850 | H. sapiens | RNU6-640P | RNA, U6 small nuclear 640, pseudogene |
| ENSG00000207225 | 106479871 | H. sapiens | RNU6-692P | RNA, U6 small nuclear 692, pseudogene |
| ENSG00000252890 | 106479875 | H. sapiens | RNU6-699P | RNA, U6 small nuclear 699, pseudogene |
| ENSG00000202074 | 106481405 | H. sapiens | RNU6-715P | RNA, U6 small nuclear 715, pseudogene |
| ENSG00000212468 | 106481418 | H. sapiens | RNU6-754P | RNA, U6 small nuclear 754, pseudogene |
| ENSG00000207414 | 106481775 | H. sapiens | RNU6-768P | RNA, U6 small nuclear 768, pseudogene |
| ENSG00000206807 | 106480611 | H. sapiens | RNU6-815P | RNA, U6 small nuclear 815, pseudogene |
| ENSG00000206996 | 106481447 | H. sapiens | RNU6-842P | RNA, U6 small nuclear 842, pseudogene |
| ENSG00000207183 | 106480614 | H. sapiens | RNU6-843P | RNA, U6 small nuclear 843, pseudogene |
| ENSG00000199448 | 106479940 | H. sapiens | RNU6-845P | RNA, U6 small nuclear 845, pseudogene |
| ENSG00000251757 | 106479941 | H. sapiens | RNU6-848P | RNA, U6 small nuclear 848, pseudogene |
| ENSG00000271932 | 106481203 | H. sapiens | RNU6-85P  | RNA, U6 small nuclear 85, pseudogene  |

|                 |           |            |             |                                          |
|-----------------|-----------|------------|-------------|------------------------------------------|
| ENSG00000206848 | 106480618 | H. sapiens | RNU6-890P   | RNA, U6 small nuclear 890, pseudogene    |
| ENSG00000207323 | 106479965 | H. sapiens | RNU6-901P   | RNA, U6 small nuclear 901, pseudogene    |
| ENSG00000207163 | 106479967 | H. sapiens | RNU6-905P   | RNA, U6 small nuclear 905, pseudogene    |
| ENSG00000199872 | 106481477 | H. sapiens | RNU6-942P   | RNA, U6 small nuclear 942, pseudogene    |
| ENSG00000221507 | 106479560 | H. sapiens | RNU6ATAC40P | RNA, U6atac small nuclear 40, pseudogene |
| ENSG00000252222 | 100147761 | H. sapiens | RNU7-13P    | RNA, U7 small nuclear 13 pseudogene      |
| ENSG00000238452 | 106479079 | H. sapiens | RNU7-144P   | RNA, U7 small nuclear 144 pseudogene     |
| ENSG00000252003 | 106481802 | H. sapiens | RNU7-154P   | RNA, U7 small nuclear 154 pseudogene     |
| ENSG00000238950 | 106479090 | H. sapiens | RNU7-173P   | RNA, U7 small nuclear 173 pseudogene     |
| ENSG00000238721 | 106480834 | H. sapiens | RNU7-194P   | RNA, U7 small nuclear 194 pseudogene     |
| ENSG00000252514 | 100151649 | H. sapiens | RNU7-53P    | RNA, U7 small nuclear 53 pseudogene      |
| ENSG00000243844 | 646909    | H. sapiens | RPL17P33    | ribosomal protein L17 pseudogene 33      |
| ENSG00000213717 | 100271285 | H. sapiens | RPL18AP10   | ribosomal protein L18a pseudogene 10     |
| ENSG00000223916 | 731642    | H. sapiens | RPL18AP9    | ribosomal protein L18a pseudogene        |
| ENSG00000213661 | 100129374 | H. sapiens | RPL18P3     | ribosomal protein L18 pseudogene 3       |
| ENSG00000234985 | 392979    | H. sapiens | RPL18P4     | ribosomal protein L18 pseudogene 4       |
| ENSG00000224469 | 100270944 | H. sapiens | RPL18P5     | ribosomal protein L18 pseudogene 5       |
| ENSG00000224019 | 100271161 | H. sapiens | RPL21P32    | ribosomal protein L21 pseudogene 32      |
| ENSG00000224593 | 100271181 | H. sapiens | RPL21P72    | ribosomal protein L21 pseudogene 72      |
| ENSG00000243181 | 100133273 | H. sapiens | RPL21P80    | ribosomal protein L21 pseudogene 80      |
| ENSG00000243071 | 653079    | H. sapiens | RPL21P98    | ribosomal protein L21 pseudogene 98      |
| ENSG00000235990 | 645962    | H. sapiens | RPL23AP20   | ribosomal protein L23a pseudogene 20     |
| ENSG00000244413 | 645809    | H. sapiens | RPL23AP56   | ribosomal protein L23a pseudogene 56     |
| ENSG00000243964 | 440027    | H. sapiens | RPL23AP65   | ribosomal protein L23a pseudogene 65     |
| ENSG00000232751 | 730070    | H. sapiens | RPL26P11    | ribosomal protein L26 pseudogene 11      |

|                 |           |            |           |                                                               |
|-----------------|-----------|------------|-----------|---------------------------------------------------------------|
| ENSG00000225713 | 100270975 | H. sapiens | RPL30P1   | ribosomal protein L30<br>pseudogene 1                         |
| ENSG00000230837 | 140753    | H. sapiens | RPL31P2   | ribosomal protein L31<br>pseudogene 2                         |
| ENSG00000227433 | 100270989 | H. sapiens | RPL31P22  | ribosomal protein L31<br>pseudogene 22                        |
| ENSG00000241853 | 100271194 | H. sapiens | RPL31P24  | ribosomal protein L31<br>pseudogene 24                        |
| ENSG00000239983 | 727792    | H. sapiens | RPL31P31  | ribosomal protein L31<br>pseudogene 31                        |
| ENSG00000243164 | 645654    | H. sapiens | RPL31P48  | ribosomal protein L31<br>pseudogene 48                        |
| ENSG00000231333 | 100270998 | H. sapiens | RPL34P6   | ribosomal protein L34<br>pseudogene 6                         |
| ENSG00000163923 | 116832    | H. sapiens | RPL39L    | ribosomal protein L39 like                                    |
| ENSG00000256338 | 22970     | H. sapiens | RPL41P2   | ribosomal protein L41<br>pseudogene 2                         |
| ENSG00000214671 | 100270907 | H. sapiens | RPL6P12   | ribosomal protein L6<br>pseudogene 12                         |
| ENSG00000230383 | 646483    | H. sapiens | RPL6P19   | ribosomal protein L6<br>pseudogene 19                         |
| ENSG00000234358 | 100271215 | H. sapiens | RPL7AP42  | ribosomal protein L7a<br>pseudogene 42                        |
| ENSG00000242248 | 100271537 | H. sapiens | RPL7AP57  | ribosomal protein L7a<br>pseudogene 57                        |
| ENSG00000234253 | 130728    | H. sapiens | RPL7P13   | ribosomal protein L7<br>pseudogene 13                         |
| ENSG00000243806 | 100270852 | H. sapiens | RPL7P18   | ribosomal protein L7<br>pseudogene 18                         |
| ENSG00000228599 | 646912    | H. sapiens | RPL7P52   | ribosomal protein L7<br>pseudogene 52                         |
| ENSG00000238069 | 100271047 | H. sapiens | RPLP0P7   | ribosomal protein lateral<br>stalk subunit P0<br>pseudogene 7 |
| ENSG00000227560 | 100271607 | H. sapiens | RPS15AP30 | ribosomal protein S15a<br>pseudogene 30                       |
| ENSG00000244621 | 100271072 | H. sapiens | RPS17P11  | ribosomal protein S17<br>pseudogene 11                        |
| ENSG00000223918 | 100271236 | H. sapiens | RPS21P5   | ribosomal protein S21<br>pseudogene 5                         |
| ENSG00000233946 | 100271123 | H. sapiens | RPS29P4   | ribosomal protein S29<br>pseudogene 4                         |
| ENSG00000244249 | 100270859 | H. sapiens | RPS2P19   | ribosomal protein S2<br>pseudogene 19                         |
| ENSG00000243894 | 727951    | H. sapiens | RPS3AP16  | RPS3A pseudogene 16                                           |
| ENSG00000217684 | 100271253 | H. sapiens | RPS3AP24  | RPS3A pseudogene 24                                           |
| ENSG00000243101 | 645957    | H. sapiens | RPS3P7    | ribosomal protein S3<br>pseudogene 7                          |
| ENSG00000230871 | 100130313 | H. sapiens | RPS6P23   | ribosomal protein S6<br>pseudogene 23                         |

|                 |           |            |            |                                                                              |
|-----------------|-----------|------------|------------|------------------------------------------------------------------------------|
| ENSG00000244669 | 100130347 | H. sapiens | RPS6P5     | ribosomal protein S6<br>pseudogene 5                                         |
| ENSG00000213326 | 644315    | H. sapiens | RPS7P11    | ribosomal protein S7<br>pseudogene 11                                        |
| ENSG00000240167 | 100270870 | H. sapiens | RPS7P7     | ribosomal protein S7<br>pseudogene 7                                         |
| ENSG00000240376 | 728553    | H. sapiens | RPS8P8     | ribosomal protein S8<br>pseudogene 8                                         |
| ENSG00000241597 | 100133054 | H. sapiens | RPS9P3     | ribosomal protein S9<br>pseudogene 3                                         |
| ENSG00000267524 | 390857    | H. sapiens | RPSAP57    | ribosomal protein SA<br>pseudogene 57                                        |
| ENSG00000250327 | 105377595 | H. sapiens | RPSAP70    | ribosomal protein SA<br>pseudogene 70                                        |
| ENSG00000189306 | 27341     | H. sapiens | RRP7A      | ribosomal RNA processing 7<br>homolog A                                      |
| ENSG00000182010 | 219790    | H. sapiens | RTKN2      | rhotekin 2                                                                   |
| ENSG00000176225 | 25914     | H. sapiens | RTTN       | rotatin                                                                      |
| ENSG00000163191 | 6282      | H. sapiens | S100A11    | S100 calcium binding<br>protein A11                                          |
| ENSG00000280515 | 104548973 | H. sapiens | SALRNA2    | senescence associated long<br>non-coding RNA 2                               |
| ENSG00000079689 | 10590     | H. sapiens | SCGN       | secretagoin, EF-hand<br>calcium binding protein                              |
| ENSG00000236107 | 101929680 | H. sapiens | SCN1A-AS1  | SCN1A and SCN9A antisense<br>RNA 1                                           |
| ENSG00000168447 | 6338      | H. sapiens | SCNN1B     | sodium channel epithelial<br>1 subunit beta                                  |
| ENSG00000236272 | 105373051 | H. sapiens | SCUBE1-AS2 | SCUBE1 antisense RNA 2                                                       |
| ENSG00000245928 | 101928809 | H. sapiens | SDAD1-AS1  | SDAD1 antisense RNA 1                                                        |
| ENSG00000139410 | 113675    | H. sapiens | SDSL       | serine dehydratase like                                                      |
| ENSG00000138674 | 22872     | H. sapiens | SEC31A     | SEC31 homolog A, COPII<br>coat complex component<br>smooth muscle and        |
| ENSG00000254703 | 100507392 | H. sapiens | SENCR      | endothelial cell enriched<br>migration/differentiation-<br>associated lncRNA |
| ENSG00000263718 | 105371907 | H. sapiens | SEPTIN9-DT | SEPTIN9 divergent<br>transcript                                              |
| ENSG00000106366 | 5054      | H. sapiens | SERPINE1   | serpin family E member 1                                                     |
| ENSG00000149212 | 143686    | H. sapiens | SESN3      | sestrin 3                                                                    |
| ENSG00000145423 | 6423      | H. sapiens | SFRP2      | secreted frizzled related<br>protein 2                                       |
| ENSG00000163069 | 6443      | H. sapiens | SGCB       | sarcoglycan beta                                                             |
| ENSG00000170624 | 6444      | H. sapiens | SGCD       | sarcoglycan delta                                                            |
| ENSG00000147010 | 30011     | H. sapiens | SH3KBP1    | SH3 domain containing<br>kinase binding protein 1                            |
| ENSG00000162105 | 22941     | H. sapiens | SHANK2     | SH3 and multiple ankyrin<br>repeat domains 2                                 |
| ENSG00000089012 | 55423     | H. sapiens | SIRPG      | signal regulatory protein<br>gamma                                           |



|                 |           |            |             |                                                                 |
|-----------------|-----------|------------|-------------|-----------------------------------------------------------------|
| ENSG00000162241 | 283130    | H. sapiens | SLC25A45    | solute carrier family 25 member 45                              |
| ENSG00000224281 | 100303728 | H. sapiens | SLC25A5-AS1 | SLC25A5 antisense RNA 1                                         |
| ENSG00000116704 | 23169     | H. sapiens | SLC35D1     | solute carrier family 35 member D1                              |
| ENSG00000134955 | 219855    | H. sapiens | SLC37A2     | solute carrier family 37 member 2                               |
| ENSG00000129353 | 57153     | H. sapiens | SLC44A2     | solute carrier family 44 member 2                               |
| ENSG00000013293 | 57709     | H. sapiens | SLC7A14     | solute carrier family 7 member 14                               |
| ENSG00000181804 | 285195    | H. sapiens | SLC9A9      | solute carrier family 9 member A9                               |
| ENSG00000164037 | 150159    | H. sapiens | SLC9B1      | solute carrier family 9 member B1                               |
| ENSG00000234855 | 100505540 | H. sapiens | SLIT1-AS1   | SLIT1 antisense RNA 1                                           |
| ENSG00000095932 | 284422    | H. sapiens | SMIM24      | small integral membrane protein 24                              |
| ENSG00000230758 | 101290500 | H. sapiens | SNAP23P1    | synaptosome associated protein 23 pseudogene 1                  |
| ENSG00000184602 | 8303      | H. sapiens | SNN         | stannin                                                         |
| ENSG00000212588 | 677810    | H. sapiens | SNORA26     | small nucleolar RNA, H/ACA box 26                               |
| ENSG00000206780 | 109616994 | H. sapiens | SNORA75B    | small nucleolar RNA, H/ACA box 75B                              |
| ENSG00000207093 | 100033420 | H. sapiens | SNORD116-8  | small nucleolar RNA, C/D box 116-8                              |
| ENSG00000172845 | 6670      | H. sapiens | SP3         | Sp3 transcription factor                                        |
| ENSG00000153498 | 122258    | H. sapiens | SPACA7      | sperm acrosome associated 7                                     |
| ENSG00000118363 | 9789      | H. sapiens | SPCS2       | signal peptidase complex subunit 2                              |
| ENSG00000072195 | 10290     | H. sapiens | SPEG        | striated muscle enriched protein kinase                         |
| ENSG00000133710 | 11005     | H. sapiens | SPINK5      | serine peptidase inhibitor Kazal type 5                         |
| ENSG00000152377 | 6695      | H. sapiens | SPOCK1      | SPARC (osteonectin), cwcw and kazal like domains proteoglycan 1 |
| ENSG00000107742 | 9806      | H. sapiens | SPOCK2      | SPARC (osteonectin), cwcw and kazal like domains proteoglycan 2 |
| ENSG00000136158 | 10253     | H. sapiens | SPRY2       | sprouty RTK signaling antagonist 2                              |
| ENSG00000253431 | 100419416 | H. sapiens | SRPK2P      | SRSF protein kinase 2 pseudogene                                |
| ENSG00000124783 | 6745      | H. sapiens | SSR1        | signal sequence receptor subunit 1                              |
| ENSG00000115525 | 8869      | H. sapiens | ST3GAL5     | ST3 beta-galactoside alpha-2, 3-sialyltransferase 5             |

|                 |           |            |             |                                                                            |
|-----------------|-----------|------------|-------------|----------------------------------------------------------------------------|
| ENSG00000113532 | 7903      | H. sapiens | ST8SIA4     | ST8 alpha-N-acetyl-neuraminide alpha-2,8-sialyltransferase 4               |
| ENSG00000144681 | 6769      | H. sapiens | STAC        | SH3 and cysteine rich domain                                               |
| ENSG00000198648 | 27347     | H. sapiens | STK39       | serine/threonine kinase 39                                                 |
| ENSG00000196182 | 83931     | H. sapiens | STK40       | serine/threonine kinase 40                                                 |
| ENSG00000165209 | 55342     | H. sapiens | STRBP       | spermatid perinuclear RNA binding protein                                  |
| ENSG00000113387 | 10923     | H. sapiens | SUB1        | SUB1 regulator of transcription                                            |
| ENSG00000137573 | 23213     | H. sapiens | SULF1       | sulfatase 1                                                                |
| ENSG00000253579 | 106480679 | H. sapiens | SUM02P16    | SUM02 pseudogene 16                                                        |
| ENSG00000164828 | 23353     | H. sapiens | SUN1        | Sad1 and UNC84 domain containing 1                                         |
| ENSG00000132872 | 6860      | H. sapiens | SYT4        | synaptotagmin 4                                                            |
| ENSG00000187325 | 51616     | H. sapiens | TAF9B       | TATA-box binding protein associated factor 9b                              |
| ENSG00000136560 | 10010     | H. sapiens | TANK        | TRAF family member associated NFKB activator                               |
| ENSG00000204267 | 6891      | H. sapiens | TAP2        | transporter 2, ATP binding cassette subfamily B member                     |
| ENSG00000121075 | 9496      | H. sapiens | TBX4        | T-box transcription factor 4                                               |
| ENSG00000176896 | 170082    | H. sapiens | TCEANC      | transcription elongation factor A N-terminal and central domain containing |
| ENSG00000070814 | 6949      | H. sapiens | TCOF1       | treacle ribosome biogenesis factor 1                                       |
| ENSG00000256849 | 400013    | H. sapiens | TCP1P3      | t-complex 1 pseudogene 3                                                   |
| ENSG00000218819 | 100129278 | H. sapiens | TDRD15      | tudor domain containing 15                                                 |
| ENSG00000180190 | 157695    | H. sapiens | TDRP        | testis development related protein                                         |
| ENSG00000188681 | 100132288 | H. sapiens | TEKT4P2     | tektin 4 pseudogene 2                                                      |
| ENSG00000251336 | 105377573 | H. sapiens | TEMN3-AS1   | TENM3 antisense transcript 1                                               |
| ENSG00000133863 | 56154     | H. sapiens | TEX15       | testis expressed 15, meiosis and synapsis associated                       |
| ENSG00000281453 | 103611157 | H. sapiens | TGFB2-OT1   | TGFB2 overlapping transcript 1                                             |
| ENSG00000163513 | 7048      | H. sapiens | TGFBR2      | transforming growth factor beta receptor 2                                 |
| ENSG00000131931 | 55145     | H. sapiens | THAP1       | THAP domain containing 1                                                   |
| ENSG00000144115 | 55258     | H. sapiens | THNSL2      | threonine synthase like 2                                                  |
| ENSG00000206573 | 440944    | H. sapiens | THUMPD3-AS1 | THUMPD3 antisense RNA 1                                                    |
| ENSG00000111602 | 8914      | H. sapiens | TIMELESS    | timeless circadian regulator                                               |
| ENSG00000100234 | 7078      | H. sapiens | TIMP3       | TIMP metallopeptidase inhibitor 3                                          |

|                 |           |            |           |                                                                  |
|-----------------|-----------|------------|-----------|------------------------------------------------------------------|
| ENSG00000057704 | 57458     | H. sapiens | TMCC3     | transmembrane and coiled-coil domain family 3                    |
| ENSG00000143183 | 54499     | H. sapiens | TMC01     | transmembrane and coiled-coil domains 1                          |
| ENSG00000166069 | 145942    | H. sapiens | TMC05A    | transmembrane and coiled-coil domains 5A                         |
| ENSG00000166292 | 55273     | H. sapiens | TMEM100   | transmembrane protein 100                                        |
| ENSG00000132406 | 85013     | H. sapiens | TMEM128   | transmembrane protein 128                                        |
| ENSG00000170006 | 201799    | H. sapiens | TMEM154   | transmembrane protein 154                                        |
| ENSG00000121895 | 80008     | H. sapiens | TMEM156   | transmembrane protein 156                                        |
| ENSG00000134490 | 85019     | H. sapiens | TMEM241   | transmembrane protein 241                                        |
| ENSG00000171729 | 55092     | H. sapiens | TMEM51    | transmembrane protein 51                                         |
| ENSG00000133687 | 83857     | H. sapiens | TMTC1     | transmembrane 0-mannosyltransferase targeting cadherins 1        |
| ENSG00000179104 | 160335    | H. sapiens | TMTC2     | transmembrane 0-mannosyltransferase targeting cadherins 2        |
| ENSG00000118503 | 7128      | H. sapiens | TNFAIP3   | TNF alpha induced protein 3                                      |
| ENSG00000120949 | 943       | H. sapiens | TNFRSF8   | TNF receptor superfamily member 8                                |
| ENSG00000168884 | 79155     | H. sapiens | TNIP2     | TNFAIP3 interacting protein 2                                    |
| ENSG00000136205 | 64759     | H. sapiens | TNS3      | tensin 3                                                         |
| ENSG00000241874 | 100287573 | H. sapiens | TOMM22P6  | TOMM22 pseudogene 6                                              |
| ENSG00000175768 | 401505    | H. sapiens | TOMM5     | translocase of outer mitochondrial membrane 5                    |
| ENSG00000175274 | 9537      | H. sapiens | TP53I11   | tumor protein p53 inducible protein 11                           |
| ENSG00000146242 | 7162      | H. sapiens | TPBG      | trophoblast glycoprotein                                         |
| ENSG00000188001 | 285386    | H. sapiens | TPRG1     | tumor protein p63 regulated 1                                    |
| ENSG00000230115 | 100874027 | H. sapiens | TPRG1-AS2 | TPRG1 antisense RNA 2                                            |
| ENSG00000127191 | 7186      | H. sapiens | TRAF2     | TNF receptor associated factor 2                                 |
| ENSG00000182606 | 22906     | H. sapiens | TRAK1     | trafficking kinesin protein 1                                    |
| ENSG00000276597 | 28580     | H. sapiens | TRBV11-3  | T cell receptor beta variable 11-3                               |
| ENSG00000237254 | 28557     | H. sapiens | TRBV30    | T cell receptor beta variable 30                                 |
| ENSG00000185880 | 140691    | H. sapiens | TRIM69    | tripartite motif containing 69                                   |
| ENSG00000104321 | 8989      | H. sapiens | TRPA1     | transient receptor potential cation channel subfamily A member 1 |
| ENSG00000167723 | 162514    | H. sapiens | TRPV3     | transient receptor potential cation channel subfamily V member 3 |

|                 |           |            |          |                                              |
|-----------------|-----------|------------|----------|----------------------------------------------|
| ENSG00000068724 | 57217     | H. sapiens | TTC7A    | tetratricopeptide repeat domain 7A           |
| ENSG00000214391 | 399942    | H. sapiens | TUBAP2   | tubulin alpha pseudogene 2                   |
| ENSG00000220418 | 100288513 | H. sapiens | TUBB3P1  | tubulin beta 3 class III pseudogene 1        |
| ENSG00000126216 | 10426     | H. sapiens | TUBGCP3  | tubulin gamma complex associated protein 3   |
| ENSG00000130338 | 56995     | H. sapiens | TULP4    | TUB like protein 4                           |
| ENSG00000074966 | 7294      | H. sapiens | TXK      | TXK tyrosine kinase                          |
| ENSG00000077498 | 7299      | H. sapiens | TYR      | tyrosinase                                   |
| ENSG00000235995 | 100287279 | H. sapiens | UBE2V1P6 | UBE2V1 pseudogene 6                          |
| ENSG00000151116 | 55293     | H. sapiens | UEVLD    | UEV and lactate/malate dehydrogenase domains |
| ENSG00000107731 | 219699    | H. sapiens | UNC5B    | unc-5 netrin receptor B                      |
| ENSG00000162607 | 7398      | H. sapiens | USP1     | ubiquitin specific peptidase 1               |
| ENSG00000120800 | 27340     | H. sapiens | UTP20    | UTP20 small subunit processome component     |
| ENSG00000147679 | 84294     | H. sapiens | UTP23    | UTP23 small subunit processome component     |
| ENSG00000230489 | 100873946 | H. sapiens | VAV3-AS1 | VAV3 antisense RNA 1                         |
| ENSG00000112715 | 7422      | H. sapiens | VEGFA    | vascular endothelial growth factor A         |
| ENSG00000150630 | 7424      | H. sapiens | VEGFC    | vascular endothelial growth factor C         |
| ENSG00000026025 | 7431      | H. sapiens | VIM      | vimentin                                     |
| ENSG00000154978 | 81552     | H. sapiens | VOPP1    | VOPP1 WW domain binding protein              |
| ENSG00000048707 | 55187     | H. sapiens | VPS13D   | vacuolar protein sorting 13 homolog D        |
| ENSG00000163032 | 7447      | H. sapiens | VSNL1    | visinin like 1                               |
| ENSG00000214376 | 387804    | H. sapiens | VSTM5    | V-set and transmembrane domain containing 5  |
| ENSG00000199990 | 56664     | H. sapiens | VTRNA1-1 | vault RNA 1-1                                |
| ENSG00000204396 | 80737     | H. sapiens | VWA7     | von Willebrand factor A domain containing 7  |
| ENSG00000110799 | 7450      | H. sapiens | VWF      | von Willebrand factor                        |
| ENSG00000226210 | 100288778 | H. sapiens | WASH8P   | WAS protein family homolog 8, pseudogene     |
| ENSG00000164961 | 9897      | H. sapiens | WASHC5   | WASH complex subunit 5                       |
| ENSG00000091157 | 23335     | H. sapiens | WDR7     | WD repeat domain 7                           |
| ENSG00000166483 | 7465      | H. sapiens | WEE1     | WEE1 G2 checkpoint kinase                    |
| ENSG00000002745 | 51384     | H. sapiens | WNT16    | Wnt family member 16                         |
| ENSG00000158156 | 55113     | H. sapiens | XKR8     | XK related 8                                 |
| ENSG00000173950 | 152002    | H. sapiens | XXYLT1   | xyloside xylosyltransferase 1                |
| ENSG00000213188 | 100131012 | H. sapiens | YBX1P4   | Y-box binding protein 1 pseudogene 4         |
| ENSG00000236564 | 100130391 | H. sapiens | YWHAQP5  | YWHAQ pseudogene 5                           |
| ENSG00000109906 | 7704      | H. sapiens | ZBTB16   | zinc finger and BTB domain containing 16     |

|                 |           |            |            |                                                 |
|-----------------|-----------|------------|------------|-------------------------------------------------|
| ENSG00000156599 | 25921     | H. sapiens | ZDHHC5     | zinc finger DHHC-type<br>palmitoyltransferase 5 |
| ENSG00000128016 | 7538      | H. sapiens | ZFP36      | ZFP36 ring finger protein                       |
| ENSG00000020256 | 55734     | H. sapiens | ZFP64      | ZFP64 zinc finger protein                       |
| ENSG00000198315 | 7745      | H. sapiens | ZKSCAN8    | zinc finger with KRAB and<br>SCAN domains 8     |
| ENSG00000166261 | 7753      | H. sapiens | ZNF202     | zinc finger protein 202                         |
| ENSG00000010244 | 7756      | H. sapiens | ZNF207     | zinc finger protein 207                         |
| ENSG00000162664 | 284695    | H. sapiens | ZNF326     | zinc finger protein 326                         |
| ENSG00000269235 | 101669766 | H. sapiens | ZNF350-AS1 | ZNF350 antisense RNA 1                          |
| ENSG00000219665 | 101928464 | H. sapiens | ZNF433-AS1 | ZNF433 and ZNF878<br>antisense RNA 1            |
| ENSG00000267871 | 105372476 | H. sapiens | ZNF460-AS1 | ZNF460 antisense RNA 1                          |
| ENSG00000144026 | 84874     | H. sapiens | ZNF514     | zinc finger protein 514                         |
| ENSG00000172000 | 80032     | H. sapiens | ZNF556     | zinc finger protein 556                         |
| ENSG00000130544 | 79230     | H. sapiens | ZNF557     | zinc finger protein 557                         |
| ENSG00000146757 | 168374    | H. sapiens | ZNF92      | zinc finger protein 92                          |
| ENSG00000170044 | 131368    | H. sapiens | ZPLD1      | zona pellucida like domain<br>containing 1      |

| GroupID   | Category                | Term       | Description                                                              | LogP     | Log (q-value) | InTerm_InList |
|-----------|-------------------------|------------|--------------------------------------------------------------------------|----------|---------------|---------------|
| 1_Summary | GO Biological Processes | GO:0001525 | angiogenesis                                                             | -6.64804 | -2.302        | 39/611        |
| 1_Member  | GO Biological Processes | GO:0001525 | angiogenesis                                                             | -6.64804 | -2.302        | 39/611        |
| 1_Member  | GO Biological Processes | GO:0048514 | blood vessel morphogenesis                                               | -5.87672 | -2.052        | 41/707        |
| 1_Member  | GO Biological Processes | GO:0001568 | blood vessel development                                                 | -5.37222 | -2.052        | 43/794        |
| 1_Member  | GO Biological Processes | GO:1901342 | regulation of vasculature development                                    | -4.81377 | -1.672        | 28/446        |
| 1_Member  | GO Biological Processes | GO:0045765 | regulation of angiogenesis                                               | -4.26255 | -1.379        | 25/404        |
| 1_Member  | GO Biological Processes | GO:0071363 | cellular response to growth factor stimulus                              | -2.69214 | -0.692        | 32/719        |
| 1_Member  | GO Biological Processes | GO:0070848 | response to growth factor                                                | -2.6891  | -0.692        | 33/749        |
| 1_Member  | GO Biological Processes | GO:0001935 | endothelial cell proliferation                                           | -2.54881 | -0.647        | 13/207        |
| 1_Member  | GO Biological Processes | GO:1901343 | negative regulation of vasculature development                           | -2.54881 | -0.647        | 13/207        |
| 1_Member  | GO Biological Processes | GO:1904018 | positive regulation of vasculature development                           | -2.49395 | -0.616        | 14/235        |
| 1_Member  | GO Biological Processes | GO:0016525 | negative regulation of negative regulation of blood vessel morphogenesis | -2.37758 | -0.547        | 12/192        |
| 1_Member  | GO Biological Processes | GO:2000181 | negative regulation of blood vessel morphogenesis                        | -2.34187 | -0.523        | 12/194        |
| 1_Member  | GO Biological Processes | GO:0045766 | positive regulation of epithelial cell proliferation                     | -2.10745 | -0.416        | 12/208        |
| 1_Member  | GO Biological Processes | GO:0050673 | epithelial cell proliferation                                            | -2.02103 | -0.381        | 21/465        |
| 2_Summary | GO Biological Processes | GO:0003013 | circulatory system process                                               | -5.83748 | -2.052        | 35/559        |
| 2_Member  | GO Biological Processes | GO:0003013 | circulatory system process                                               | -5.83748 | -2.052        | 35/559        |
| 2_Member  | GO Biological Processes | GO:0008015 | blood circulation                                                        | -5.60138 | -2.052        | 34/548        |
| 2_Member  | GO Biological Processes | GO:0006939 | smooth muscle contraction                                                | -3.29275 | -0.968        | 10/109        |
| 2_Member  | GO Biological Processes | GO:0044057 | regulation of system process                                             | -2.74264 | -0.725        | 29/626        |
| 2_Member  | GO Biological Processes | GO:0003012 | muscle system process                                                    | -2.69559 | -0.692        | 23/460        |
| 2_Member  | GO Biological Processes | GO:0006936 | muscle contraction                                                       | -2.59022 | -0.657        | 19/359        |
| 2_Member  | GO Biological Processes | GO:0090257 | regulation of muscle system                                              | -2.56413 | -0.648        | 15/256        |
| 2_Member  | GO Biological Processes | GO:0006937 | regulation of muscle contraction                                         | -2.27834 | -0.482        | 11/173        |
| 2_Member  | GO Biological Processes | GO:0003018 | vascular process in circulatory system                                   | -2.24154 | -0.465        | 11/175        |
| 2_Member  | GO Biological Processes | GO:0006940 | regulation of smooth muscle contraction                                  | -2.19174 | -0.457        | 6/65          |
| 3_Summary | GO Biological Processes | GO:1901385 | regulation of voltage-gated calcium channel activity                     | -5.5351  | -2.052        | 8/36          |
| 3_Member  | GO Biological Processes | GO:1901385 | regulation of voltage-gated calcium channel activity                     | -5.5351  | -2.052        | 8/36          |
| 3_Member  | GO Biological Processes | GO:0043269 | regulation of ion transport                                              | -3.08662 | -0.877        | 33/708        |
| 3_Member  | GO Biological Processes | GO:0034765 | regulation of ion transmembrane transport                                | -3.01398 | -0.850        | 25/489        |
| 3_Member  | GO Biological Processes | GO:0010959 | regulation of metal ion transport                                        | -2.8138  | -0.753        | 21/396        |
| 3_Member  | GO Biological Processes | GO:1901019 | regulation of calcium ion transmembrane transporter activity             | -2.68441 | -0.692        | 8/89          |
| 3_Member  | GO Biological Processes | GO:0034762 | regulation of transmembrane transport                                    | -2.65264 | -0.690        | 27/577        |
| 3_Member  | GO Biological Processes | GO:2001259 | positive regulation of cation channel activity                           | -2.63943 | -0.686        | 7/71          |
| 3_Member  | GO Biological Processes | GO:2001257 | regulation of cation channel activity                                    | -2.56524 | -0.648        | 12/182        |
| 3_Member  | GO Biological Processes | GO:0070588 | calcium ion transmembrane transport                                      | -2.55987 | -0.648        | 17/308        |
| 3_Member  | GO Biological Processes | GO:0098662 | inorganic cation transmembrane transport                                 | -2.52884 | -0.634        | 33/767        |
| 3_Member  | GO Biological Processes | GO:0043270 | positive regulation of ion transport                                     | -2.52851 | -0.634        | 16/284        |
| 3_Member  | GO Biological Processes | GO:0006816 | calcium ion transport                                                    | -2.43922 | -0.574        | 21/426        |
| 3_Member  | GO Biological Processes | GO:1901387 | positive regulation of voltage-gated calcium channel activity            | -2.40004 | -0.552        | 3/13          |
| 3_Member  | GO Biological Processes | GO:1904062 | regulation of cation transmembrane transport                             | -2.36691 | -0.540        | 18/349        |
| 3_Member  | GO Biological Processes | GO:1903169 | regulation of calcium ion transmembrane transport                        | -2.23891 | -0.465        | 10/151        |
| 3_Member  | GO Biological Processes | GO:0032414 | positive regulation of ion transmembrane transporter activity            | -2.21787 | -0.461        | 8/106         |

|           |                         |            |                                                                                         |          |        |        |
|-----------|-------------------------|------------|-----------------------------------------------------------------------------------------|----------|--------|--------|
| 3_Member  | GO Biological Processes | GO:0070838 | divalent metal ion transport                                                            | -2.21391 | -0.461 | 22/475 |
| 3_Member  | GO Biological Processes | GO:0051924 | regulation of calcium ion                                                               | -2.21364 | -0.461 | 14/253 |
| 3_Member  | GO Biological Processes | GO:0072511 | divalent inorganic cation                                                               | -2.15278 | -0.431 | 22/481 |
| 3_Member  | GO Biological Processes | GO:0034764 | positive regulation of<br>transmembrane transport                                       | -2.07605 | -0.402 | 12/210 |
| 3_Member  | GO Biological Processes | GO:0034767 | positive regulation of ion<br>transmembrane transport                                   | -2.04992 | -0.396 | 10/161 |
| 3_Member  | GO Biological Processes | GO:0032412 | regulation of ion transmembrane<br>transporter activity                                 | -2.04478 | -0.396 | 14/265 |
| 3_Member  | GO Biological Processes | GO:0032411 | positive regulation of<br>transporter activity                                          | -2.03339 | -0.390 | 8/114  |
| 4_Summary | GO Biological Processes | GO:0019932 | second-messenger-mediated                                                               | -5.51467 | -2.052 | 30/456 |
| 4_Member  | GO Biological Processes | GO:0019932 | second-messenger-mediated                                                               | -5.51467 | -2.052 | 30/456 |
| 4_Member  | GO Biological Processes | GO:0019933 | cAMP-mediated signaling                                                                 | -3.6795  | -1.146 | 15/199 |
| 4_Member  | GO Biological Processes | GO:0019935 | cyclic-nucleotide-mediated<br>adenylate cyclase-activating G                            | -3.61792 | -1.129 | 16/224 |
| 4_Member  | GO Biological Processes | GO:0007189 | protein-coupled receptor<br>signaling pathway                                           | -3.3672  | -0.999 | 12/147 |
| 4_Member  | GO Biological Processes | GO:0045744 | negative regulation of G protein-<br>coupled receptor signaling                         | -2.55313 | -0.647 | 6/55   |
| 4_Member  | GO Biological Processes | GO:0071880 | adenylate cyclase-activating<br>adrenergic receptor signaling                           | -2.26669 | -0.475 | 4/28   |
| 4_Member  | GO Biological Processes | GO:0007187 | G protein-coupled receptor<br>signaling pathway, coupled to<br>cyclic nucleotide second | -2.072   | -0.400 | 14/263 |
| 4_Member  | GO Biological Processes | GO:0071875 | adrenergic receptor signaling<br>pathway                                                | -2.05715 | -0.398 | 4/32   |
| 5_Summary | GO Biological Processes | GO:0035924 | cellular response to vascular<br>endothelial growth factor                              | -5.4854  | -2.052 | 11/75  |
| 5_Member  | GO Biological Processes | GO:0035924 | cellular response to vascular<br>endothelial growth factor                              | -5.4854  | -2.052 | 11/75  |
| 5_Member  | GO Biological Processes | GO:0038084 | vascular endothelial growth<br>factor signaling pathway                                 | -3.50803 | -1.070 | 7/51   |
| 5_Member  | GO Biological Processes | GO:0001945 | lymph vessel development                                                                | -3.33425 | -0.978 | 5/26   |
| 5_Member  | GO Biological Processes | GO:0036303 | lymph vessel morphogenesis                                                              | -2.82213 | -0.753 | 4/20   |
| 5_Member  | Canonical Pathways      | M137       | PID VEGF VEGFR PATHWAY                                                                  | -2.75225 | -0.727 | 3/10   |
| 5_Member  | GO Biological Processes | GO:0001946 | lymphangiogenesis                                                                       | -2.21499 | -0.461 | 3/15   |
| 6_Summary | GO Biological Processes | GO:0043065 | positive regulation of apoptotic<br>process                                             | -5.39929 | -2.052 | 39/687 |
| 6_Member  | GO Biological Processes | GO:0043065 | positive regulation of apoptotic<br>process                                             | -5.39929 | -2.052 | 39/687 |
| 6_Member  | GO Biological Processes | GO:0097190 | apoptotic signaling pathway                                                             | -5.36961 | -2.052 | 36/612 |
| 6_Member  | GO Biological Processes | GO:0043068 | positive regulation of programmed<br>cell death                                         | -5.267   | -2.000 | 39/696 |
| 6_Member  | GO Biological Processes | GO:0010942 | positive regulation of cell death                                                       | -4.5461  | -1.550 | 39/749 |
| 6_Member  | GO Biological Processes | GO:2001233 | regulation of apoptotic signaling<br>pathway                                            | -4.53412 | -1.550 | 26/413 |
| 6_Member  | GO Biological Processes | GO:2001235 | positive regulation of apoptotic<br>signaling pathway                                   | -4.08337 | -1.341 | 15/183 |
| 6_Member  | GO Biological Processes | GO:2001236 | regulation of extrinsic apoptotic<br>signaling pathway                                  | -3.52733 | -1.084 | 13/162 |
| 6_Member  | GO Biological Processes | GO:0097191 | extrinsic apoptotic signaling<br>pathway                                                | -3.01939 | -0.852 | 15/230 |
| 6_Member  | GO Biological Processes | GO:2001238 | positive regulation of extrinsic<br>apoptotic signaling pathway                         | -2.67852 | -0.692 | 6/52   |
| 6_Member  | GO Biological Processes | GO:2001237 | negative regulation of extrinsic<br>apoptotic signaling pathway                         | -2.19373 | -0.457 | 8/107  |
| 6_Member  | GO Biological Processes | GO:2001234 | negative regulation of apoptotic<br>signaling pathway                                   | -2.12178 | -0.422 | 13/233 |
| 7_Summary | GO Biological Processes | GO:0046635 | positive regulation of alpha-beta<br>T cell activation                                  | -5.35729 | -2.052 | 10/63  |
| 7_Member  | GO Biological Processes | GO:0046635 | positive regulation of alpha-beta<br>T cell activation                                  | -5.35729 | -2.052 | 10/63  |

|          |                         |            |                                                          |          |        |        |
|----------|-------------------------|------------|----------------------------------------------------------|----------|--------|--------|
| 7_Member | GO Biological Processes | GO:0046634 | regulation of alpha-beta T cell activation               | -5.13672 | -1.934 | 12/97  |
| 7_Member | GO Biological Processes | GO:0050865 | regulation of cell activation                            | -5.13459 | -1.934 | 37/653 |
| 7_Member | GO Biological Processes | GO:0002694 | regulation of leukocyte                                  | -4.65037 | -1.581 | 34/608 |
| 7_Member | GO Biological Processes | GO:0046638 | positive regulation of alpha-beta T cell differentiation | -4.62653 | -1.581 | 8/47   |
| 7_Member | GO Biological Processes | GO:1903708 | positive regulation of                                   | -4.55782 | -1.550 | 17/207 |
| 7_Member | GO Biological Processes | GO:0045580 | regulation of T cell                                     | -4.46251 | -1.531 | 14/150 |
| 7_Member | GO Biological Processes | GO:0050867 | positive regulation of cell activation                   | -4.3941  | -1.495 | 26/421 |
| 7_Member | GO Biological Processes | GO:0002696 | positive regulation of leukocyte activation              | -4.2281  | -1.359 | 25/406 |
| 7_Member | GO Biological Processes | GO:0045619 | regulation of lymphocyte differentiation                 | -4.13744 | -1.341 | 15/181 |
| 7_Member | GO Biological Processes | GO:1902107 | positive regulation of leukocyte differentiation         | -4.12519 | -1.341 | 14/161 |
| 7_Member | GO Biological Processes | GO:0051249 | regulation of lymphocyte                                 | -4.1075  | -1.341 | 29/515 |
| 7_Member | GO Biological Processes | GO:0045621 | positive regulation of lymphocyte differentiation        | -4.08092 | -1.341 | 11/105 |
| 7_Member | GO Biological Processes | GO:0046631 | alpha-beta T cell activation                             | -3.97674 | -1.264 | 13/146 |
| 7_Member | GO Biological Processes | GO:0045582 | positive regulation of T cell differentiation            | -3.89559 | -1.193 | 10/92  |
| 7_Member | GO Biological Processes | GO:0050863 | regulation of T cell activation                          | -3.80744 | -1.184 | 21/332 |
| 7_Member | GO Biological Processes | GO:0070661 | leukocyte proliferation                                  | -3.69437 | -1.146 | 20/314 |
| 7_Member | GO Biological Processes | GO:0046649 | lymphocyte activation                                    | -3.67568 | -1.146 | 37/767 |
| 7_Member | GO Biological Processes | GO:1902105 | regulation of leukocyte differentiation                  | -3.65634 | -1.137 | 19/292 |
| 7_Member | GO Biological Processes | GO:0046637 | regulation of alpha-beta T cell differentiation          | -3.64443 | -1.137 | 8/64   |
| 7_Member | GO Biological Processes | GO:0030217 | T cell differentiation                                   | -3.49404 | -1.063 | 17/253 |
| 7_Member | GO Biological Processes | GO:0022409 | positive regulation of cell-cell adhesion                | -3.4507  | -1.029 | 18/279 |
| 7_Member | GO Biological Processes | GO:1903037 | regulation of leukocyte cell-cell adhesion               | -3.43125 | -1.016 | 20/329 |
| 7_Member | GO Biological Processes | GO:1903039 | positive regulation of leukocyte cell-cell adhesion      | -3.38577 | -1.001 | 16/235 |
| 7_Member | GO Biological Processes | GO:0051251 | positive regulation of lymphocyte activation             | -3.38356 | -1.001 | 21/357 |
| 7_Member | GO Biological Processes | GO:0030155 | regulation of cell adhesion                              | -3.37368 | -1.001 | 35/738 |
| 7_Member | GO Biological Processes | GO:0050870 | positive regulation of T cell activation                 | -3.342   | -0.978 | 15/214 |
| 7_Member | GO Biological Processes | GO:0032943 | mononuclear cell proliferation                           | -3.30487 | -0.968 | 18/287 |
| 7_Member | GO Biological Processes | GO:0070663 | regulation of leukocyte proliferation                    | -3.28567 | -0.965 | 16/240 |
| 7_Member | GO Biological Processes | GO:0007159 | leukocyte cell-cell adhesion                             | -3.2736  | -0.960 | 21/364 |
| 7_Member | GO Biological Processes | GO:1903706 | regulation of hemopoiesis                                | -3.21906 | -0.944 | 26/500 |
| 7_Member | GO Biological Processes | GO:0030098 | lymphocyte differentiation                               | -3.21235 | -0.944 | 21/368 |
| 7_Member | GO Biological Processes | GO:0032944 | regulation of mononuclear cell proliferation             | -3.19644 | -0.933 | 15/221 |
| 7_Member | GO Biological Processes | GO:0045785 | positive regulation of cell                              | -3.10385 | -0.882 | 23/428 |
| 7_Member | GO Biological Processes | GO:0042110 | T cell activation                                        | -3.07661 | -0.876 | 25/484 |
| 7_Member | GO Biological Processes | GO:0002521 | leukocyte differentiation                                | -3.07646 | -0.876 | 27/539 |
| 7_Member | GO Biological Processes | GO:0022407 | regulation of cell-cell adhesion                         | -2.93147 | -0.810 | 23/441 |
| 7_Member | GO Biological Processes | GO:0046651 | lymphocyte proliferation                                 | -2.93108 | -0.810 | 17/284 |
| 7_Member | GO Biological Processes | GO:0046632 | alpha-beta T cell differentiation                        | -2.77993 | -0.732 | 9/106  |
| 7_Member | GO Biological Processes | GO:0050670 | regulation of lymphocyte proliferation                   | -2.77423 | -0.729 | 14/219 |
| 7_Member | GO Biological Processes | GO:2000516 | positive regulation of CD4-positive, alpha-beta T cell   | -2.66783 | -0.692 | 5/36   |
| 7_Member | GO Biological Processes | GO:0035710 | CD4-positive, alpha-beta T cell activation               | -2.45071 | -0.583 | 8/97   |
| 7_Member | GO Biological Processes | GO:0042129 | regulation of T cell                                     | -2.39281 | -0.548 | 11/167 |
| 7_Member | GO Biological Processes | GO:0042098 | T cell proliferation                                     | -2.30675 | -0.498 | 12/196 |



|            |                         |            |                                                          |          |        |        |
|------------|-------------------------|------------|----------------------------------------------------------|----------|--------|--------|
| 7_Member   | GO Biological Processes | GO:2000514 | regulation of CD4-positive, alpha-beta T cell activation | -2.25793 | -0.473 | 6/63   |
| 7_Member   | GO Biological Processes | GO:0050671 | positive regulation of lymphocyte proliferation          | -2.06382 | -0.398 | 9/136  |
| 7_Member   | GO Biological Processes | GO:0032946 | positive regulation of mononuclear cell proliferation    | -2.04399 | -0.396 | 9/137  |
| 8_Summary  | GO Biological Processes | GO:0001819 | positive regulation of cytokine production               | -4.94481 | -1.775 | 29/463 |
| 8_Member   | GO Biological Processes | GO:0001819 | positive regulation of cytokine production               | -4.94481 | -1.775 | 29/463 |
| 8_Member   | GO Biological Processes | GO:0032652 | regulation of interleukin-1 production                   | -4.49646 | -1.541 | 12/112 |
| 8_Member   | GO Biological Processes | GO:0032612 | interleukin-1 production                                 | -4.12932 | -1.341 | 12/122 |
| 8_Member   | GO Biological Processes | GO:0035456 | response to interferon-beta                              | -3.84152 | -1.184 | 6/32   |
| 8_Member   | GO Biological Processes | GO:0035458 | cellular response to interferon-                         | -3.59771 | -1.117 | 5/23   |
| 8_Member   | GO Biological Processes | GO:0032732 | positive regulation of interleukin-1 production          | -3.07125 | -0.876 | 7/60   |
| 8_Member   | GO Biological Processes | GO:0032651 | regulation of interleukin-1 beta production              | -3.02102 | -0.852 | 9/98   |
| 8_Member   | GO Biological Processes | GO:0032611 | interleukin-1 beta production                            | -2.75156 | -0.727 | 9/107  |
| 8_Member   | GO Biological Processes | GO:0032731 | positive regulation of interleukin-1 beta production     | -2.63572 | -0.684 | 6/53   |
| 8_Member   | GO Biological Processes | GO:0031349 | positive regulation of defense response                  | -2.56408 | -0.648 | 25/528 |
| 9_Summary  | GO Biological Processes | GO:0018209 | peptidyl-serine modification                             | -4.70196 | -1.586 | 23/333 |
| 9_Member   | GO Biological Processes | GO:0018209 | peptidyl-serine modification                             | -4.70196 | -1.586 | 23/333 |
| 9_Member   | GO Biological Processes | GO:0018105 | peptidyl-serine phosphorylation                          | -3.76798 | -1.178 | 20/310 |
| 9_Member   | GO Biological Processes | GO:0033135 | regulation of peptidyl-serine phosphorylation            | -3.42133 | -1.016 | 12/145 |
| 9_Member   | GO Biological Processes | GO:0033138 | positive regulation of peptidyl-serine phosphorylation   | -2.69591 | -0.692 | 9/109  |
| 9_Member   | GO Biological Processes | GO:0018210 | peptidyl-threonine modification                          | -2.27482 | -0.480 | 9/126  |
| 10_Summary | GO Biological Processes | GO:0007610 | behavior                                                 | -4.63589 | -1.581 | 34/609 |
| 10_Member  | GO Biological Processes | GO:0007610 | behavior                                                 | -4.63589 | -1.581 | 34/609 |
| 10_Member  | GO Biological Processes | GO:0007612 | learning                                                 | -2.36173 | -0.539 | 10/145 |
| 10_Member  | GO Biological Processes | GO:0050806 | positive regulation of synaptic transmission             | -2.29699 | -0.492 | 11/172 |
| 10_Member  | GO Biological Processes | GO:0042391 | regulation of membrane potential                         | -2.2481  | -0.467 | 21/443 |
| 10_Member  | GO Biological Processes | GO:0060291 | long-term synaptic potentiation                          | -2.14864 | -0.430 | 7/87   |
| 10_Member  | GO Biological Processes | GO:0050804 | modulation of chemical synaptic transmission             | -2.13184 | -0.425 | 21/454 |
| 10_Member  | GO Biological Processes | GO:0099177 | regulation of trans-synaptic signaling                   | -2.12154 | -0.422 | 21/455 |
| 10_Member  | GO Biological Processes | GO:1900271 | regulation of long-term synaptic potentiation            | -2.11991 | -0.422 | 5/48   |
| 10_Member  | GO Biological Processes | GO:0007611 | learning or memory                                       | -2.11351 | -0.419 | 14/260 |
| 11_Summary | GO Biological Processes | GO:0032663 | regulation of interleukin-2 production                   | -4.48955 | -1.541 | 8/49   |
| 11_Member  | GO Biological Processes | GO:0032663 | regulation of interleukin-2 production                   | -4.48955 | -1.541 | 8/49   |
| 11_Member  | GO Biological Processes | GO:0032623 | interleukin-2 production                                 | -4.17548 | -1.341 | 8/54   |
| 11_Member  | GO Biological Processes | GO:0032743 | positive regulation of interleukin-2 production          | -2.3857  | -0.547 | 4/26   |
| 11_Member  | Canonical Pathways      | M128       | PID TNF PATHWAY                                          | -2.19838 | -0.457 | 5/46   |
| 12_Summary | GO Biological Processes | GO:0008285 | negative regulation of cell proliferation                | -4.40192 | -1.495 | 40/788 |
| 12_Member  | GO Biological Processes | GO:0008285 | negative regulation of cell proliferation                | -4.40192 | -1.495 | 40/788 |
| 13_Summary | GO Biological Processes | GO:0007163 | establishment or maintenance of cell polarity            | -4.17524 | -1.341 | 17/222 |
| 13_Member  | GO Biological Processes | GO:0007163 | establishment or maintenance of cell polarity            | -4.17524 | -1.341 | 17/222 |
| 13_Member  | GO Biological Processes | GO:0030010 | establishment of cell polarity                           | -4.06872 | -1.341 | 13/143 |

|            |                         |               |                                                                                        |          |        |        |
|------------|-------------------------|---------------|----------------------------------------------------------------------------------------|----------|--------|--------|
| 14_Summary | Reactome Gene Sets      | R-HSA-8877330 | RUNX1 and FOXP3 control the development of regulatory T lymphocytes (Tregs)            | -4.09635 | -1.341 | 4/10   |
| 14_Member  | Reactome Gene Sets      | R-HSA-8877330 | RUNX1 and FOXP3 control the development of regulatory T lymphocytes (Tregs)            | -4.09635 | -1.341 | 4/10   |
| 14_Member  | GO Biological Processes | GO:0002683    | negative regulation of immune system process                                           | -4.06449 | -1.341 | 28/492 |
| 14_Member  | GO Biological Processes | GO:0002695    | negative regulation of leukocyte activation                                            | -3.00407 | -0.845 | 13/184 |
| 14_Member  | GO Biological Processes | GO:0050869    | negative regulation of B cell activation                                               | -2.9035  | -0.800 | 5/32   |
| 14_Member  | GO Biological Processes | GO:0070664    | negative regulation of leukocyte proliferation                                         | -2.77956 | -0.732 | 8/86   |
| 14_Member  | GO Biological Processes | GO:0045066    | regulatory T cell differentiation                                                      | -2.72361 | -0.712 | 5/35   |
| 14_Member  | GO Biological Processes | GO:0051250    | negative regulation of lymphocyte activation                                           | -2.66374 | -0.692 | 11/154 |
| 14_Member  | GO Biological Processes | GO:0050866    | negative regulation of cell activation                                                 | -2.54881 | -0.647 | 13/207 |
| 14_Member  | GO Biological Processes | GO:0032945    | negative regulation of mononuclear cell proliferation                                  | -2.34694 | -0.527 | 7/80   |
| 14_Member  | GO Biological Processes | GO:0007162    | negative regulation of cell regulation                                                 | -2.28598 | -0.486 | 16/301 |
| 14_Member  | GO Biological Processes | GO:0045589    | regulation of regulatory T cell differentiation                                        | -2.05715 | -0.398 | 4/32   |
| 14_Member  | GO Biological Processes | GO:0030889    | negative regulation of B cell proliferation                                            | -2.05704 | -0.398 | 3/17   |
| 15_Summary | GO Biological Processes | GO:0060541    | respiratory system development                                                         | -4.08711 | -1.341 | 16/204 |
| 15_Member  | GO Biological Processes | GO:0060541    | respiratory system development                                                         | -4.08711 | -1.341 | 16/204 |
| 15_Member  | GO Biological Processes | GO:0030324    | lung development                                                                       | -3.6884  | -1.146 | 14/177 |
| 15_Member  | GO Biological Processes | GO:0030323    | respiratory tube development                                                           | -3.58796 | -1.117 | 14/181 |
| 16_Summary | GO Biological Processes | GO:0080135    | regulation of cellular response to stress                                              | -3.86751 | -1.184 | 38/778 |
| 16_Member  | GO Biological Processes | GO:0080135    | regulation of cellular response to stress                                              | -3.86751 | -1.184 | 38/778 |
| 16_Member  | GO Biological Processes | GO:2001020    | regulation of response to DNA damage stimulus                                          | -3.57444 | -1.109 | 16/226 |
| 16_Member  | GO Biological Processes | GO:0008630    | intrinsic apoptotic signaling pathway in response to DNA damage                        | -3.49021 | -1.063 | 10/103 |
| 16_Member  | GO Biological Processes | GO:0097193    | intrinsic apoptotic signaling pathway                                                  | -3.25185 | -0.960 | 18/290 |
| 16_Member  | GO Biological Processes | GO:2001242    | regulation of intrinsic apoptotic signaling pathway                                    | -2.41251 | -0.552 | 11/166 |
| 16_Member  | GO Biological Processes | GO:2001021    | negative regulation of response to DNA damage stimulus                                 | -2.25915 | -0.473 | 7/83   |
| 16_Member  | GO Biological Processes | GO:0042771    | intrinsic apoptotic signaling pathway in response to DNA damage by p53 class mediator  | -2.23926 | -0.465 | 5/45   |
| 16_Member  | GO Biological Processes | GO:1902230    | negative regulation of intrinsic apoptotic signaling pathway in response to DNA damage | -2.10639 | -0.416 | 4/31   |
| 17_Summary | GO Biological Processes | GO:0001836    | release of cytochrome c from mitochondria                                              | -3.84339 | -1.184 | 8/60   |
| 17_Member  | GO Biological Processes | GO:0001836    | release of cytochrome c from mitochondria                                              | -3.84339 | -1.184 | 8/60   |
| 17_Member  | GO Biological Processes | GO:0090199    | regulation of release of cytochrome c from mitochondria                                | -3.6184  | -1.129 | 7/49   |
| 17_Member  | GO Biological Processes | GO:0090200    | positive regulation of release of cytochrome c from mitochondria                       | -3.17829 | -0.925 | 5/28   |
| 17_Member  | GO Biological Processes | GO:1905477    | positive regulation of protein localization to membrane                                | -2.25262 | -0.469 | 9/127  |
| 18_Summary | GO Biological Processes | GO:0048511    | rhythmic process                                                                       | -3.84313 | -1.184 | 20/306 |
| 18_Member  | GO Biological Processes | GO:0048511    | rhythmic process                                                                       | -3.84313 | -1.184 | 20/306 |
| 18_Member  | GO Biological Processes | GO:0042749    | regulation of circadian sleep/wake cycle                                               | -3.69493 | -1.146 | 5/22   |

|            |                         |            |                                                       |          |        |        |
|------------|-------------------------|------------|-------------------------------------------------------|----------|--------|--------|
| 18_Member  | GO Biological Processes | GO:0022410 | circadian sleep/wake cycle                            | -3.41779 | -1.016 | 5/25   |
| 18_Member  | GO Biological Processes | GO:0007623 | circadian rhythm                                      | -3.25795 | -0.960 | 15/218 |
| 18_Member  | GO Biological Processes | GO:0042745 | circadian sleep/wake cycle                            | -3.17829 | -0.925 | 5/28   |
| 18_Member  | GO Biological Processes | GO:0045187 | regulation of circadian sleep/wake cycle, sleep       | -3.00399 | -0.845 | 4/18   |
| 18_Member  | GO Biological Processes | GO:0048512 | circadian behavior                                    | -2.81349 | -0.753 | 6/49   |
| 18_Member  | GO Biological Processes | GO:0030431 | sleep                                                 | -2.7814  | -0.732 | 5/34   |
| 18_Member  | GO Biological Processes | GO:0007622 | rhythmic behavior                                     | -2.76736 | -0.727 | 6/50   |
| 18_Member  | GO Biological Processes | GO:0050802 | circadian sleep/wake cycle, sleep                     | -2.66088 | -0.692 | 4/22   |
| 18_Member  | GO Biological Processes | GO:0042752 | regulation of circadian rhythm                        | -2.36626 | -0.540 | 9/122  |
| 18_Member  | GO Biological Processes | GO:0048520 | positive regulation of behavior                       | -2.32486 | -0.509 | 4/27   |
| 18_Member  | GO Biological Processes | GO:0051932 | synaptic transmission, GABAergic                      | -2.11991 | -0.422 | 5/48   |
| 18_Member  | GO Biological Processes | GO:0042753 | positive regulation of circadian rhythm               | -2.05704 | -0.398 | 3/17   |
| 18_Member  | GO Biological Processes | GO:0050795 | regulation of behavior                                | -2.00846 | -0.377 | 6/71   |
| 19_Summary | GO Biological Processes | GO:0050708 | regulation of protein secretion                       | -3.82981 | -1.184 | 24/405 |
| 19_Member  | GO Biological Processes | GO:0050708 | regulation of protein secretion                       | -3.82981 | -1.184 | 24/405 |
| 19_Member  | GO Biological Processes | GO:0002791 | regulation of peptide secretion                       | -3.77369 | -1.178 | 25/434 |
| 19_Member  | GO Biological Processes | GO:1903532 | positive regulation of secretion by cell              | -3.21864 | -0.944 | 20/342 |
| 19_Member  | GO Biological Processes | GO:0051223 | regulation of protein transport                       | -3.11496 | -0.889 | 31/648 |
| 19_Member  | GO Biological Processes | GO:0090087 | regulation of peptide transport                       | -3.08897 | -0.877 | 32/679 |
| 19_Member  | GO Biological Processes | GO:0051046 | regulation of secretion                               | -2.92871 | -0.810 | 34/753 |
| 19_Member  | GO Biological Processes | GO:0070201 | regulation of establishment of protein localization   | -2.92458 | -0.809 | 32/695 |
| 19_Member  | GO Biological Processes | GO:0051047 | positive regulation of secretion                      | -2.74925 | -0.727 | 20/374 |
| 19_Member  | GO Biological Processes | GO:0009306 | protein secretion                                     | -2.68437 | -0.692 | 25/517 |
| 19_Member  | GO Biological Processes | GO:1903530 | regulation of secretion by cell                       | -2.66827 | -0.692 | 31/692 |
| 19_Member  | GO Biological Processes | GO:0002793 | positive regulation of peptide secretion              | -2.6127  | -0.671 | 14/228 |
| 19_Member  | GO Biological Processes | GO:0002790 | peptide secretion                                     | -2.57141 | -0.648 | 26/556 |
| 19_Member  | GO Biological Processes | GO:0050714 | positive regulation of protein secretion              | -2.54881 | -0.647 | 13/207 |
| 19_Member  | GO Biological Processes | GO:0002792 | negative regulation of peptide secretion              | -2.38981 | -0.547 | 9/121  |
| 19_Member  | GO Biological Processes | GO:0051222 | positive regulation of protein transport              | -2.17062 | -0.444 | 18/365 |
| 19_Member  | GO Biological Processes | GO:0051048 | negative regulation of secretion                      | -2.09169 | -0.408 | 12/209 |
| 19_Member  | GO Biological Processes | GO:1904951 | establishment of protein secretion                    | -2.06177 | -0.398 | 19/403 |
| 19_Member  | GO Biological Processes | GO:0050709 | negative regulation of protein secretion              | -2.01165 | -0.377 | 8/115  |
| 20_Summary | GO Biological Processes | GO:0120179 | adherens junction disassembly                         | -3.78959 | -1.184 | 3/5    |
| 20_Member  | GO Biological Processes | GO:0120179 | adherens junction disassembly                         | -3.78959 | -1.184 | 3/5    |
| 20_Member  | GO Biological Processes | GO:0120180 | cell-substrate adherens junction disassembly          | -3.78959 | -1.184 | 3/5    |
| 20_Member  | GO Biological Processes | GO:0120181 | focal adhesion disassembly                            | -3.78959 | -1.184 | 3/5    |
| 20_Member  | GO Biological Processes | GO:0120182 | regulation of focal adhesion disassembly              | -3.78959 | -1.184 | 3/5    |
| 20_Member  | GO Biological Processes | GO:0120183 | positive regulation of focal adhesion disassembly     | -3.78959 | -1.184 | 3/5    |
| 20_Member  | GO Biological Processes | GO:0051549 | positive regulation of keratinocyte migration         | -2.50567 | -0.623 | 3/12   |
| 20_Member  | GO Biological Processes | GO:0051547 | regulation of keratinocyte migration                  | -2.30361 | -0.498 | 3/14   |
| 20_Member  | GO Biological Processes | GO:1903393 | positive regulation of adherens junction organization | -2.10639 | -0.416 | 4/31   |
