# Supplementary material for: JunB is a key regulator of multiple myeloma bone marrow angiogenesis
Source: PubMed Central journal article supplement (PMC8632680; doi:10.1038/s41375-021-01271-9), 2021-05-18
Supplement: 41375_2021_1271_MOESM4_ESM.pdf [file 41375_2021_1271_MOESM4_ESM.pdf]

| GroupID   | Category                | Term          | Description                                              | LogP     | Log (q-value) | InTerm_InList | Symbols                  |
|-----------|-------------------------|---------------|----------------------------------------------------------|----------|---------------|---------------|--------------------------|
| 1_Summary | Reactome Gene Sets      | R-HSA-9006934 | Signaling by Receptor Tyrosine Kinases                   | -6.04391 | -2.075        | 4/506         | IGF1, JUNB, VEGFA, VEGFB |
| 1_Member  | Reactome Gene Sets      | R-HSA-9006934 | Signaling by Receptor Tyrosine Kinases                   | -6.04391 | -2.075        | 4/506         | IGF1, JUNB, VEGFA, VEGFB |
| 1_Member  | GO Biological Processes | GO:0002576    | platelet degranulation                                   | -5.85232 | -2.075        | 3/128         | IGF1, VEGFA, VEGFB       |
| 1_Member  | Reactome Gene Sets      | R-HSA-114608  | Platelet degranulation                                   | -5.84212 | -2.075        | 3/129         | IGF1, VEGFA, VEGFB       |
| 1_Member  | Reactome Gene Sets      | R-HSA-76005   | Response to elevated platelet cytosolic Ca <sup>2+</sup> | -5.79233 | -2.075        | 3/134         | IGF1, VEGFA, VEGFB       |
| 1_Member  | KEGG Pathway            | hsa04510      | Focal adhesion                                           | -5.27562 | -1.731        | 3/199         | IGF1, VEGFA, VEGFB       |
| 1_Member  | GO Biological Processes | GO:0050679    | positive regulation of epithelial cell proliferation     | -5.20548 | -1.731        | 3/210         | IGF1, VEGFA, VEGFB       |
| 1_Member  | KEGG Pathway            | hsa04015      | Rap1 signaling pathway                                   | -5.20548 | -1.731        | 3/210         | IGF1, VEGFA, VEGFB       |
| 1_Member  | KEGG Pathway            | hsa04014      | Ras signaling pathway                                    | -5.10404 | -1.688        | 3/227         | IGF1, VEGFA, VEGFB       |
| 1_Member  | Reactome Gene Sets      | R-HSA-76002   | Platelet activation, signaling and aggregation           | -4.91243 | -1.548        | 3/263         | IGF1, VEGFA, VEGFB       |
| 1_Member  | KEGG Pathway            | hsa04151      | PI3K-Akt signaling pathway                               | -4.5712  | -1.286        | 3/342         | IGF1, VEGFA, VEGFB       |
| 1_Member  | Canonical Pathways      | M5883         | NABA SECRETED FACTORS                                    | -4.56364 | -1.286        | 3/344         | IGF1, VEGFA, VEGFB       |
| 1_Member  | KEGG Pathway            | hsa05200      | Pathways in cancer                                       | -4.38441 | -1.208        | 3/395         | IGF1, VEGFA, VEGFB       |
| 1_Member  | GO Biological Processes | GO:0050678    | regulation of epithelial cell proliferation              | -4.38113 | -1.208        | 3/396         | IGF1, VEGFA, VEGFB       |

|           |                         |              |                                                                  |          |        |       |                    |
|-----------|-------------------------|--------------|------------------------------------------------------------------|----------|--------|-------|--------------------|
| 1_Member  | GO Biological Processes | GO:0050673   | epithelial cell proliferation                                    | -4.20135 | -1.058 | 3/455 | IGF1, VEGFA, VEGFB |
| 1_Member  | GO Biological Processes | GO:0030335   | positive regulation of cell migration                            | -3.93313 | -0.818 | 3/560 | IGF1, VEGFA, VEGFB |
| 1_Member  | GO Biological Processes | GO:2000147   | positive regulation of cell motility                             | -3.87901 | -0.804 | 3/584 | IGF1, VEGFA, VEGFB |
| 1_Member  | GO Biological Processes | GO:0007507   | heart development                                                | -3.86802 | -0.804 | 3/589 | IGF1, VEGFA, VEGFB |
| 1_Member  | GO Biological Processes | GO:0051272   | positive regulation of cellular component movement               | -3.84203 | -0.802 | 3/601 | IGF1, VEGFA, VEGFB |
| 1_Member  | GO Biological Processes | GO:0040017   | positive regulation of locomotion                                | -3.81866 | -0.801 | 3/612 | IGF1, VEGFA, VEGFB |
| 1_Member  | Reactome Gene Sets      | R-HSA-109582 | Hemostasis                                                       | -3.79778 | -0.801 | 3/622 | IGF1, VEGFA, VEGFB |
| 1_Member  | GO Biological Processes | GO:0007169   | transmembrane receptor protein tyrosine kinase signaling pathway | -3.57956 | -0.675 | 3/737 | IGF1, VEGFA, VEGFB |
| 1_Member  | Canonical Pathways      | M5885        | NABA MATRISOME ASSOCIATED                                        | -3.55197 | -0.664 | 3/753 | IGF1, VEGFA, VEGFB |
| 1_Member  | GO Biological Processes | GO:0045055   | regulated exocytosis                                             | -3.4807  | -0.639 | 3/796 | IGF1, VEGFA, VEGFB |
| 2_Summary | GO Biological Processes | GO:0001701   | in utero embryonic development                                   | -4.41763 | -1.208 | 3/385 | IGF1, JUNB, VEGFA  |
| 2_Member  | GO Biological Processes | GO:0001701   | in utero embryonic development                                   | -4.41763 | -1.208 | 3/385 | IGF1, JUNB, VEGFA  |
| 2_Member  | GO Biological Processes | GO:0043009   | chordate embryonic development                                   | -3.74903 | -0.772 | 3/646 | IGF1, JUNB, VEGFA  |
| 2_Member  | GO Biological Processes | GO:0009792   | embryo development ending in birth or egg hatching               | -3.71366 | -0.756 | 3/664 | IGF1, JUNB, VEGFA  |
| 2_Member  | GO Biological Processes | GO:0003006   | developmental process involved in reproduction                   | -3.67736 | -0.743 | 3/683 | IGF1, JUNB, VEGFA  |

|           |                         |            |                                              |          |        |       |                    |
|-----------|-------------------------|------------|----------------------------------------------|----------|--------|-------|--------------------|
| 3_Summary | GO Biological Processes | GO:0048514 | blood vessel morphogenesis                   | -3.66425 | -0.743 | 3/690 | JUNB, VEGFA, VEGFB |
| 3_Member  | GO Biological Processes | GO:0048514 | blood vessel morphogenesis                   | -3.66425 | -0.743 | 3/690 | JUNB, VEGFA, VEGFB |
| 3_Member  | GO Biological Processes | GO:0001568 | blood vessel development                     | -3.5117  | -0.655 | 3/777 | JUNB, VEGFA, VEGFB |
| 4_Summary | GO Biological Processes | GO:1901137 | carbohydrate derivative biosynthetic process | -3.51666 | -0.655 | 3/774 | IGF1, PIGF, VEGFB  |
| 4_Member  | GO Biological Processes | GO:1901137 | carbohydrate derivative biosynthetic process | -3.51666 | -0.655 | 3/774 | IGF1, PIGF, VEGFB  |

**MCODE Cluster 1**

| GO         | Category                | Description                                                | LogP     | #Gene<br>InGO | #GeneInG<br>OAndHitL<br>ist | Hits                                                   | Log(q-<br>value) |
|------------|-------------------------|------------------------------------------------------------|----------|---------------|-----------------------------|--------------------------------------------------------|------------------|
| GO:0007204 | GO Biological Processes | positive regulation of cytosolic calcium ion concentration | -17.642  | 322           | 10                          | ADCY5 APLNR C3AR1 CCR5 DRD2 CXCR3 GPER1 CXCR2 CCL1 NMU | -13.9947         |
| GO:0030595 | GO Biological Processes | leukocyte chemotaxis                                       | -9.5587  | 233           | 6                           | ANXA1 C3AR1 CCR5 CXCR3 CXCR2 CCL1                      | -6.46772         |
| ko04062    | KEGG Pathway            | Chemokine signaling pathway                                | -8.07621 | 182           | 5                           | ADCY5 CCR5 CXCR3 CXCR2 CCL1                            | -5.03665         |
| GO:1904018 | GO Biological Processes | positive regulation of vasculature development             | -7.52058 | 235           | 5                           | APLNR ANXA1 C3AR1 GPER1 CXCR2                          | -4.55454         |

**MCODE Cluster 2**

| GO         | Category                | Description                                    | LogP     | #Gene<br>InGO | #GeneInG<br>OAndHitL<br>ist | Hits                        | Log(q-<br>value) |
|------------|-------------------------|------------------------------------------------|----------|---------------|-----------------------------|-----------------------------|------------------|
| GO:0002576 | GO Biological Processes | platelet degranulation                         | -8.25479 | 129           | 5                           | CLU IGF1 ORM1 VEGFA MMRN1   | -4.42738         |
| GO:0045785 | GO Biological Processes | positive regulation of cell adhesion           | -5.66554 | 428           | 5                           | IGF1 IL2RA IL10 ITPKB VEGFA | -2.40973         |
| GO:0019932 | GO Biological Processes | second-messenger-mediated signaling            | -5.53096 | 456           | 5                           | ADRA1B GCG GRM5 IGF1 VEGFA  | -2.3608          |
| GO:0045860 | GO Biological Processes | positive regulation of protein kinase activity | -5.16941 | 541           | 5                           | CLU GCG GRM5 IGF1 VEGFA     | -2.1019          |

**MCODE Cluster 3**

| GO         | Category                | Description                                          | LogP     | #Gene<br>InGO | #GeneInG<br>OAndHitL<br>ist | Hits                                   | Log(q-<br>value) |
|------------|-------------------------|------------------------------------------------------|----------|---------------|-----------------------------|----------------------------------------|------------------|
| ko04060    | KEGG Pathway            | Cytokine-cytokine receptor interaction               | -7.73058 | 270           | 6                           | IFNAR2 IFNGR2 IL1ORA VEGFC IL23A IL17F | -3.44565         |
| ko04630    | KEGG Pathway            | Jak-STAT signaling pathway                           | -7.25953 | 156           | 5                           | IFNAR2 IFNGR2 IL1ORA MCL1 IL23A        | -3.44565         |
| hsa05200   | KEGG Pathway            | Pathways in cancer                                   | -5.80108 | 575           | 6                           | IFNAR2 IFNGR2 JUN VEGFC IL23A CYCS     | -2.73358         |
| GO:0032103 | GO Biological Processes | positive regulation of response to external stimulus | -5.5922  | 339           | 5                           | ADORA2B SERPINE1 VEGFC IL23A IL17F     | -2.56477         |
| GO:0002696 | GO Biological Processes | positive regulation of leukocyte activation          | -5.21065 | 406           | 5                           | ADORA2B CTLA4 CD55 ITGAM IL23A         | -2.30799         |
| GO:0050900 | GO Biological Processes | leukocyte migration                                  | -4.69975 | 518           | 5                           | CD44 ITGAM SERPINE1 VEGFC IL23A        | -1.9098          |
