# Supplementary material for: JunB is a key regulator of multiple myeloma bone marrow angiogenesis
Source: PubMed Central journal article supplement (PMC8632680; doi:10.1038/s41375-021-01271-9), 2021-05-18
Supplement: 41375_2021_1271_MOESM5_ESM.pdf [file 41375_2021_1271_MOESM5_ESM.pdf]

## VEGF

| Matrix ID | Name          | Score     | Relative score | Sequence ID                    | Start | End | Strand | Predicted sequence |
|-----------|---------------|-----------|----------------|--------------------------------|-------|-----|--------|--------------------|
| MA1132.1  | JUN::JUNB     | 4.12107   | 0.759722736    | NC_000006.12:43767882-43768097 | 51    | 60  | +      | GTTGGCTTAT         |
| MA0490.1  | JUNB          | -2.49437  | 0.757619687    | NC_000006.12:43767882-43768097 | 87    | 97  | +      | GAGTGACTGGT        |
| MA1137.1  | FOSL1::JUNB   | 4.81772   | 0.755958332    | NC_000006.12:43767882-43768097 | 159   | 171 | +      | TTTTACTAAGAC       |
| MA1137.1  | FOSL1::JUNB   | 4.26797   | 0.743178438    | NC_000006.12:43767882-43768097 | 14    | 26  | +      | TTGTAACACACCT      |
| MA0490.1  | JUNB          | -3.65814  | 0.74257083     | NC_000006.12:43767882-43768097 | 85    | 95  | -      | CAGTCACTCCG        |
| MA1135.1  | FOSB::JUNB    | 1.33875   | 0.736292029    | NC_000006.12:43767882-43768097 | 160   | 169 | +      | TTTTACTAAG         |
| MA0490.1  | JUNB          | -4.40179  | 0.732954473    | NC_000006.12:43767882-43768097 | 16    | 26  | -      | AGGTGTGTTAC        |
| MA0490.2  | JUNB          | 1.69019   | 0.72790234     | NC_000006.12:43767882-43768097 | 159   | 171 | +      | TTTTACTAAGAC       |
| MA1140.1  | JUNB (var. 2) | 3.98047   | 0.726449566    | NC_000006.12:43767882-43768097 | 11    | 20  | +      | TTGTTGTAAC         |
| MA1132.1  | JUN::JUNB     | 2.64066   | 0.72630277     | NC_000006.12:43767882-43768097 | 15    | 24  | +      | TGTAACACAC         |
| MA1140.1  | JUNB (var. 2) | 3.91472   | 0.724830867    | NC_000006.12:43767882-43768097 | 11    | 20  | -      | GTTACAACAA         |
| MA1137.1  | FOSL1::JUNB   | 3.38836   | 0.722730438    | NC_000006.12:43767882-43768097 | 97    | 109 | +      | TGATGGCTATCCC      |
| MA1132.1  | JUN::JUNB     | 2.4561    | 0.72213633     | NC_000006.12:43767882-43768097 | 204   | 213 | +      | GCTGAAGAAG         |
| MA1134.1  | FOS::JUNB     | 0.769282  | 0.721136515    | NC_000006.12:43767882-43768097 | 14    | 25  | -      | GGTGTGTTACAA       |
| MA0490.1  | JUNB          | -5.46936  | 0.719149526    | NC_000006.12:43767882-43768097 | 14    | 24  | +      | TTGTAACACAC        |
| MA1138.1  | FOSL2::JUNB   | 0.293743  | 0.717062413    | NC_000006.12:43767882-43768097 | 160   | 169 | +      | TTTTACTAAG         |
| MA1135.1  | FOSB::JUNB    | 0.280769  | 0.716993946    | NC_000006.12:43767882-43768097 | 204   | 213 | +      | GCTGAAGAAG         |
| MA1132.1  | JUN::JUNB     | 2.2162    | 0.716720518    | NC_000006.12:43767882-43768097 | 98    | 107 | +      | GATGGCTATC         |
| MA1134.1  | FOS::JUNB     | 0.490004  | 0.716251231    | NC_000006.12:43767882-43768097 | 159   | 170 | -      | TCTTAGTAAAAA       |
| MA0490.1  | JUNB          | -5.81269  | 0.714709922    | NC_000006.12:43767882-43768097 | 161   | 171 | -      | GTCTTAGTAAA        |
| MA1135.1  | FOSB::JUNB    | 0.136294  | 0.714358668    | NC_000006.12:43767882-43768097 | 161   | 170 | -      | TCTTAGTAAA         |
| MA0490.2  | JUNB          | 0.82096   | 0.712518057    | NC_000006.12:43767882-43768097 | 87    | 99  | +      | GAGTGACTGGTGA      |
| MA1137.1  | FOSL1::JUNB   | 2.91884   | 0.711815616    | NC_000006.12:43767882-43768097 | 203   | 215 | +      | GGCTGAAGAAGGC      |
| MA1134.1  | FOS::JUNB     | 0.22851   | 0.711677016    | NC_000006.12:43767882-43768097 | 160   | 171 | +      | TTTTACTAAGAC       |
| MA1138.1  | FOSL2::JUNB   | -0.191085 | 0.708244331    | NC_000006.12:43767882-43768097 | 204   | 213 | +      | GCTGAAGAAG         |
| MA1135.1  | FOSB::JUNB    | -0.205884 | 0.708117169    | NC_000006.12:43767882-43768097 | 88    | 97  | +      | AGTGACTGGT         |
| MA1132.1  | JUN::JUNB     | 1.83192   | 0.708045513    | NC_000006.12:43767882-43768097 | 188   | 197 | +      | GTTGGCTCTT         |
| MA1134.1  | FOS::JUNB     | 0.0207567 | 0.708042872    | NC_000006.12:43767882-43768097 | 87    | 98  | -      | CACCAGTCACTC       |
| MA1138.1  | FOSL2::JUNB   | -0.224047 | 0.707644815    | NC_000006.12:43767882-43768097 | 88    | 97  | +      | AGTGACTGGT         |
| MA1137.1  | FOSL1::JUNB   | 2.70908   | 0.706939423    | NC_000006.12:43767882-43768097 | 14    | 26  | -      | AGGTGTGTTACAA      |
| MA1135.1  | FOSB::JUNB    | -0.273292 | 0.706887625    | NC_000006.12:43767882-43768097 | 15    | 24  | +      | TGTAACACAC         |
| MA1132.1  | JUN::JUNB     | 1.69831   | 0.705029297    | NC_000006.12:43767882-43768097 | 160   | 169 | +      | TTTTACTAAG         |

|          |                    |           |             |                                |     |     |   |               |
|----------|--------------------|-----------|-------------|--------------------------------|-----|-----|---|---------------|
| MA1132.1 | JUN::JUNB          | 1.67511   | 0.704505499 | NC_000006.12:43767882-43768097 | 161 | 170 | - | TCTTAGTAAA    |
| MA1132.1 | JUN::JUNB          | 1.66457   | 0.704267675 | NC_000006.12:43767882-43768097 | 16  | 25  | - | GGTGTGTTAC    |
| MA1135.1 | FOSB::JUNB         | -0.485494 | 0.703016966 | NC_000006.12:43767882-43768097 | 16  | 25  | - | GGTGTGTTAC    |
| MA1133.1 | JUN::JUNB(var.2)   | 2.86455   | 0.70297279  | NC_000006.12:43767882-43768097 | 10  | 21  | - | TGTTACAACAAC  |
| MA1132.1 | JUN::JUNB          | 1.59708   | 0.702744104 | NC_000006.12:43767882-43768097 | 88  | 97  | + | AGTGACTGGT    |
| MA1139.1 | FOSL2::JUNB(var.2) | 1.14209   | 0.702423396 | NC_000006.12:43767882-43768097 | 10  | 21  | + | GTTGTTGTAACA  |
| MA1137.1 | FOSL1::JUNB        | 2.49899   | 0.702055587 | NC_000006.12:43767882-43768097 | 87  | 99  | + | GAGTGACTGGTGA |
| MA1139.1 | FOSL2::JUNB(var.2) | 1.11118   | 0.701884428 | NC_000006.12:43767882-43768097 | 10  | 21  | - | TGTTACAACAAC  |
| MA1138.1 | FOSL2::JUNB        | -0.587508 | 0.701034143 | NC_000006.12:43767882-43768097 | 161 | 170 | - | TCTTAGTAAA    |

## IGF1

| Matrix ID | Name                 | Score   | Relative score | Sequence ID                       | Start | End | Strand | Predicted sequence |
|-----------|----------------------|---------|----------------|-----------------------------------|-------|-----|--------|--------------------|
| MA0490.1  | JUNB                 | 15.5159 | 0.990513609    | NC_000012.12:c102475036-102474456 | 350   | 360 | -      | GAATGACTCAT        |
| MA0490.2  | JUNB                 | 16.1308 | 0.983483241    | NC_000012.12:c102475036-102474456 | 348   | 360 | -      | GAATGACTCATGC      |
| MA1135.1  | FOSB::JUNB           | 14.6617 | 0.979309151    | NC_000012.12:c102475036-102474456 | 431   | 440 | +      | GATGACTCAC         |
| MA1132.1  | JUN::JUNB            | 13.785  | 0.977884343    | NC_000012.12:c102475036-102474456 | 350   | 359 | -      | AATGACTCAT         |
| MA1132.1  | JUN::JUNB            | 13.7757 | 0.977674607    | NC_000012.12:c102475036-102474456 | 431   | 440 | +      | GATGACTCAC         |
| MA1138.1  | FOSL2::JUNB          | 14.6138 | 0.977516485    | NC_000012.12:c102475036-102474456 | 431   | 440 | +      | GATGACTCAC         |
| MA0490.1  | JUNB                 | 14.4184 | 0.976322622    | NC_000012.12:c102475036-102474456 | 430   | 440 | +      | TGATGACTCAC        |
| MA1138.1  | FOSL2::JUNB          | 14.4653 | 0.974816291    | NC_000012.12:c102475036-102474456 | 350   | 359 | -      | AATGACTCAT         |
| MA1134.1  | FOS::JUNB            | 15.112  | 0.972028594    | NC_000012.12:c102475036-102474456 | 430   | 441 | -      | TGTGAGTCATCA       |
| MA1137.1  | FOSL1::JUNB          | 14.0502 | 0.97058286     | NC_000012.12:c102475036-102474456 | 430   | 442 | +      | TGATGACTCACAC      |
| MA0490.1  | JUNB                 | 13.772  | 0.967963608    | NC_000012.12:c102475036-102474456 | 432   | 442 | -      | GTGTGAGTCAT        |
| MA1135.1  | FOSB::JUNB           | 14.0125 | 0.967466994    | NC_000012.12:c102475036-102474456 | 350   | 359 | -      | AATGACTCAT         |
| MA1134.1  | FOS::JUNB            | 14.6496 | 0.96393931     | NC_000012.12:c102475036-102474456 | 349   | 360 | +      | CATGAGTCATTC       |
| MA1135.1  | FOSB::JUNB           | 13.6637 | 0.961105733    | NC_000012.12:c102475036-102474456 | 349   | 358 | +      | CATGAGTCAT         |
| MA1138.1  | FOSL2::JUNB          | 13.6374 | 0.959758718    | NC_000012.12:c102475036-102474456 | 349   | 358 | +      | CATGAGTCAT         |
| MA1138.1  | FOSL2::JUNB          | 13.4001 | 0.955442043    | NC_000012.12:c102475036-102474456 | 432   | 441 | -      | TGTGAGTCAT         |
| MA1137.1  | FOSL1::JUNB          | 13.397  | 0.955398946    | NC_000012.12:c102475036-102474456 | 348   | 360 | -      | GAATGACTCATGC      |
| MA1134.1  | FOS::JUNB            | 14.1487 | 0.955176447    | NC_000012.12:c102475036-102474456 | 431   | 442 | +      | GATGACTCACAC       |
| MA1135.1  | FOSB::JUNB           | 13.3316 | 0.955047952    | NC_000012.12:c102475036-102474456 | 432   | 441 | -      | TGTGAGTCAT         |
| MA0490.1  | JUNB                 | 12.6449 | 0.953388907    | NC_000012.12:c102475036-102474456 | 348   | 358 | +      | GCATGAGTCAT        |
| MA1134.1  | FOS::JUNB            | 13.6703 | 0.946808337    | NC_000012.12:c102475036-102474456 | 348   | 359 | -      | AATGACTCATGC       |
| MA0490.2  | JUNB                 | 13.8661 | 0.943401031    | NC_000012.12:c102475036-102474456 | 430   | 442 | +      | TGATGACTCACAC      |
| MA0490.2  | JUNB                 | 13.5107 | 0.9371110364   | NC_000012.12:c102475036-102474456 | 348   | 360 | +      | GCATGAGTCATTC      |
| MA1137.1  | FOSL1::JUNB          | 11.3462 | 0.907724676    | NC_000012.12:c102475036-102474456 | 430   | 442 | -      | GTGTGAGTCATCA      |
| MA1137.1  | FOSL1::JUNB          | 11.1925 | 0.90415025     | NC_000012.12:c102475036-102474456 | 348   | 360 | +      | GCATGAGTCATTC      |
| MA1132.1  | JUN::JUNB            | 10.3886 | 0.901212783    | NC_000012.12:c102475036-102474456 | 349   | 358 | +      | CATGAGTCAT         |
| MA0490.2  | JUNB                 | 11.3725 | 0.899266707    | NC_000012.12:c102475036-102474456 | 430   | 442 | -      | GTGTGAGTCATCA      |
| MA1132.1  | JUN::JUNB            | 9.68411 | 0.885307795    | NC_000012.12:c102475036-102474456 | 432   | 441 | -      | TGTGAGTCAT         |
| MA1136.1  | FOSB::JUNB (var. 2)  | 8.80432 | 0.849059269    | NC_000012.12:c102475036-102474456 | 59    | 68  | -      | GTGATATCAT         |
| MA1139.1  | FOSL2::JUNB (var. 2) | 9.40732 | 0.846550511    | NC_000012.12:c102475036-102474456 | 58    | 69  | -      | GGTATATCATT        |
| MA1139.1  | FOSL2::JUNB (var. 2) | 9.38453 | 0.846153039    | NC_000012.12:c102475036-102474456 | 58    | 69  | +      | AATGATATCACC       |
| MA1133.1  | JUN::JUNB (var. 2)   | 9.50516 | 0.84088166     | NC_000012.12:c102475036-102474456 | 58    | 69  | -      | GGTATATCATT        |

|          |                    |         |             |                                   |     |     |   |             |
|----------|--------------------|---------|-------------|-----------------------------------|-----|-----|---|-------------|
| MA1136.1 | FOSB::JUNB(var. 2) | 8.07561 | 0.834339888 | NC_000012.12:c102475036-102474456 | 59  | 68  | + | ATGATATCAC  |
| MA1140.1 | JUNB(var. 2)       | 7.78452 | 0.820099296 | NC_000012.12:c102475036-102474456 | 59  | 68  | - | GTGATATCAT  |
| MA1140.1 | JUNB(var. 2)       | 7.76371 | 0.819587007 | NC_000012.12:c102475036-102474456 | 59  | 68  | + | ATGATATCAC  |
| MA0490.1 | JUNB               | 2.17992 | 0.818063922 | NC_000012.12:c102475036-102474456 | 203 | 213 | + | CAATGATTCTT |
| MA0490.1 | JUNB               | 2.00434 | 0.815793425 | NC_000012.12:c102475036-102474456 | 551 | 561 | + | AGATCAGTAAG |
| MA0490.1 | JUNB               | 1.98583 | 0.815554121 | NC_000012.12:c102475036-102474456 | 96  | 106 | - | AAGTGATTCTG |
| MA1132.1 | JUN::JUNB          | 6.3186  | 0.809331765 | NC_000012.12:c102475036-102474456 | 99  | 108 | + | AATCACTTAT  |
| MA1132.1 | JUN::JUNB          | 5.92385 | 0.800420495 | NC_000012.12:c102475036-102474456 | 223 | 232 | + | GATCACTTAA  |

## FOX03

| Matrix ID | Name        | Score   | Relative score | Sequence ID                      | Start | End | Strand | Predicted sequence |
|-----------|-------------|---------|----------------|----------------------------------|-------|-----|--------|--------------------|
| MA1135.1  | FOSB::JUNB  | 13.107  | 0.950950624    | NC_000006.12:108564265-108564583 | 8     | 17  | +      | TATGACTAAT         |
| MA1138.1  | FOSL2::JUNB | 13.0539 | 0.949145638    | NC_000006.12:108564265-108564583 | 8     | 17  | +      | TATGACTAAT         |
| MA1137.1  | FOSL1::JUNB | 13.0888 | 0.948233114    | NC_000006.12:108564265-108564583 | 7     | 19  | +      | TTATGACTAATAG      |
| MA1132.1  | JUN::JUNB   | 12.0539 | 0.938806509    | NC_000006.12:108564265-108564583 | 8     | 17  | +      | TATGACTAAT         |
| MA1134.1  | FOS::JUNB   | 13.1929 | 0.938456991    | NC_000006.12:108564265-108564583 | 7     | 18  | -      | TATTAGTCATAA       |
| MA1137.1  | FOSL1::JUNB | 12.6169 | 0.937262978    | NC_000006.12:108564265-108564583 | 135   | 147 | -      | AAATGACTAATCA      |
| MAO490.1  | JUNB        | 11.177  | 0.934406264    | NC_000006.12:108564265-108564583 | 137   | 147 | -      | AAATGACTAAT        |
| MA1138.1  | FOSL2::JUNB | 12.2116 | 0.933825402    | NC_000006.12:108564265-108564583 | 137   | 146 | -      | AATGACTAAT         |
| MA1132.1  | JUN::JUNB   | 11.7034 | 0.930893962    | NC_000006.12:108564265-108564583 | 137   | 146 | -      | AATGACTAAT         |
| MA1135.1  | FOSB::JUNB  | 11.9762 | 0.930323634    | NC_000006.12:108564265-108564583 | 137   | 146 | -      | AATGACTAAT         |
| MAO490.2  | JUNB        | 12.9257 | 0.926755716    | NC_000006.12:108564265-108564583 | 135   | 147 | -      | AAATGACTAATCA      |
| MAO490.1  | JUNB        | 10.3058 | 0.923141389    | NC_000006.12:108564265-108564583 | 7     | 17  | +      | TTATGACTAAT        |
| MA1134.1  | FOS::JUNB   | 12.1755 | 0.920661514    | NC_000006.12:108564265-108564583 | 136   | 147 | +      | GATTAGTCATTT       |
| MAO490.2  | JUNB        | 12.3463 | 0.916501751    | NC_000006.12:108564265-108564583 | 7     | 19  | +      | TTATGACTAATAG      |
| MA1135.1  | FOSB::JUNB  | 9.66741 | 0.888210754    | NC_000006.12:108564265-108564583 | 136   | 145 | +      | GATTAGTCAT         |
| MA1138.1  | FOSL2::JUNB | 9.40618 | 0.882800287    | NC_000006.12:108564265-108564583 | 136   | 145 | +      | GATTAGTCAT         |
| MA1134.1  | FOS::JUNB   | 9.91751 | 0.881162763    | NC_000006.12:108564265-108564583 | 8     | 19  | +      | TATGACTAATAG       |
| MA1134.1  | FOS::JUNB   | 9.75661 | 0.878348186    | NC_000006.12:108564265-108564583 | 135   | 146 | -      | AATGACTAATCA       |
| MA1135.1  | FOSB::JUNB  | 9.04035 | 0.876772833    | NC_000006.12:108564265-108564583 | 187   | 196 | +      | TCTGAGTAAT         |
| MA1135.1  | FOSB::JUNB  | 9.01469 | 0.876304739    | NC_000006.12:108564265-108564583 | 9     | 18  | -      | TATTAGTCAT         |
| MAO490.2  | JUNB        | 10.0507 | 0.875872279    | NC_000006.12:108564265-108564583 | 135   | 147 | +      | TGATTAGTCATTT      |
| MA1138.1  | FOSL2::JUNB | 8.86388 | 0.872936829    | NC_000006.12:108564265-108564583 | 9     | 18  | -      | TATTAGTCAT         |
| MA1138.1  | FOSL2::JUNB | 8.74434 | 0.870762707    | NC_000006.12:108564265-108564583 | 187   | 196 | +      | TCTGAGTAAT         |
| MAO490.1  | JUNB        | 6.00921 | 0.867581209    | NC_000006.12:108564265-108564583 | 135   | 145 | +      | TGATTAGTCAT        |
| MAO490.1  | JUNB        | 5.88253 | 0.865943019    | NC_000006.12:108564265-108564583 | 186   | 196 | +      | TTCTGAGTAAT        |
| MAO490.2  | JUNB        | 9.40945 | 0.864523317    | NC_000006.12:108564265-108564583 | 7     | 19  | -      | CTATTAGTCATAA      |
| MAO490.2  | JUNB        | 9.03933 | 0.857972716    | NC_000006.12:108564265-108564583 | 186   | 198 | -      | ACATTACTCAGAA      |
| MA1137.1  | FOSL1::JUNB | 9.11837 | 0.855933996    | NC_000006.12:108564265-108564583 | 7     | 19  | -      | CTATTAGTCATAA      |
| MA1137.1  | FOSL1::JUNB | 9.09435 | 0.85537554     | NC_000006.12:108564265-108564583 | 135   | 147 | +      | TGATTAGTCATTT      |
| MA1132.1  | JUN::JUNB   | 8.28004 | 0.853611148    | NC_000006.12:108564265-108564583 | 89    | 98  | +      | TGTGACCCAT         |
| MAO490.1  | JUNB        | 4.82724 | 0.852296972    | NC_000006.12:108564265-108564583 | 88    | 98  | +      | TTGTGACCCAT        |
| MA1135.1  | FOSB::JUNB  | 7.50096 | 0.848693634    | NC_000006.12:108564265-108564583 | 89    | 98  | +      | TGTGACCCAT         |

|          |             |         |             |                                  |     |     |   |               |
|----------|-------------|---------|-------------|----------------------------------|-----|-----|---|---------------|
| MA1134.1 | FOS::JUNB   | 7.97161 | 0.847123866 | NC_000006.12:108564265-108564583 | 186 | 197 | - | CATTACTCAGAA  |
| MA1138.1 | FOSL2::JUNB | 7.38592 | 0.846055597 | NC_000006.12:108564265-108564583 | 89  | 98  | + | TGTGACCCAT    |
| MA1132.1 | JUN::JUNB   | 7.9218  | 0.845523968 | NC_000006.12:108564265-108564583 | 136 | 145 | + | GATTAGTCAT    |
| MA1135.1 | FOSB::JUNB  | 7.2662  | 0.844411443 | NC_000006.12:108564265-108564583 | 188 | 197 | - | CATTACTCAG    |
| MA1137.1 | FOSL1::JUNB | 8.5595  | 0.842942181 | NC_000006.12:108564265-108564583 | 186 | 198 | + | TTCTGAGTAATGT |
| MAO490.1 | JUNB        | 3.98191 | 0.841365776 | NC_000006.12:108564265-108564583 | 9   | 19  | - | CTATTAGTCAT   |
| MAO490.1 | JUNB        | 3.84579 | 0.839605606 | NC_000006.12:108564265-108564583 | 90  | 100 | - | AAATGGGTCAC   |
| MA1137.1 | FOSL1::JUNB | 8.18597 | 0.834258808 | NC_000006.12:108564265-108564583 | 88  | 100 | + | TTGTGACCCATTT |
| MA1138.1 | FOSL2::JUNB | 6.72962 | 0.834118812 | NC_000006.12:108564265-108564583 | 188 | 197 | - | CATTACTCAG    |
| MA1134.1 | FOS::JUNB   | 7.19632 | 0.833562141 | NC_000006.12:108564265-108564583 | 88  | 99  | - | AATGGGTCACAA  |
| MA1134.1 | FOS::JUNB   | 7.19449 | 0.833530136 | NC_000006.12:108564265-108564583 | 187 | 198 | + | TCTGAGTAATGT  |
| MAO490.1 | JUNB        | 3.30847 | 0.832657358 | NC_000006.12:108564265-108564583 | 188 | 198 | - | ACATTACTCAG   |
| MA1137.1 | FOSL1::JUNB | 8.09367 | 0.832113266 | NC_000006.12:108564265-108564583 | 186 | 198 | - | ACATTACTCAGAA |
| MA1132.1 | JUN::JUNB   | 7.29265 | 0.831320855 | NC_000006.12:108564265-108564583 | 9   | 18  | - | TATTAGTCAT    |
| MA1132.1 | JUN::JUNB   | 7.13    | 0.827649175 | NC_000006.12:108564265-108564583 | 187 | 196 | + | TCTGAGTAAT    |
| MAO490.2 | JUNB        | 7.22591 | 0.825877435 | NC_000006.12:108564265-108564583 | 186 | 198 | + | TTCTGAGTAATGT |
| MAO490.2 | JUNB        | 6.78659 | 0.818102065 | NC_000006.12:108564265-108564583 | 88  | 100 | + | TTGTGACCCATTT |
| MA1138.1 | FOSL2::JUNB | 5.29457 | 0.808017912 | NC_000006.12:108564265-108564583 | 90  | 99  | - | AATGGGTCAC    |
| MA1132.1 | JUN::JUNB   | 6.25011 | 0.807785632 | NC_000006.12:108564265-108564583 | 188 | 197 | - | CATTACTCAG    |
| MA1135.1 | FOSB::JUNB  | 5.12983 | 0.805443116 | NC_000006.12:108564265-108564583 | 90  | 99  | - | AATGGGTCAC    |
| MA1134.1 | FOS::JUNB   | 5.53535 | 0.804507479 | NC_000006.12:108564265-108564583 | 89  | 100 | + | TGTGACCCATTT  |

**TRAF2**

| <b>Matrix ID</b> | <b>Name</b> | <b>Score</b> | <b>Relative score</b> | <b>Sequence ID</b>               | <b>Start</b> | <b>End</b> | <b>Strand</b> | <b>Predicted sequence</b> |
|------------------|-------------|--------------|-----------------------|----------------------------------|--------------|------------|---------------|---------------------------|
| MAO490.1         | JUNB        | 14.9192      | 0.98279805            | NC_000009.12:136882569-136882916 | 143          | 153        | -             | GGGTGACTCAC               |
| MAO490.1         | JUNB        | 13.5379      | 0.96493557            | NC_000009.12:136882569-136882916 | 141          | 151        | +             | GAGTGAGTCAC               |
| MA1135.1         | FOSB::JUNB  | 13.7803      | 0.96323167            | NC_000009.12:136882569-136882916 | 143          | 152        | -             | GGTGACTCAC                |
| MA1138.1         | FOSL2::JUNB | 13.6476      | 0.95994294            | NC_000009.12:136882569-136882916 | 143          | 152        | -             | GGTGACTCAC                |
| MA1134.1         | FOS::JUNB   | 13.3306      | 0.94086707            | NC_000009.12:136882569-136882916 | 142          | 153        | +             | AGTGAGTCACCC              |
| MA1132.1         | JUN::JUNB   | 12.0866      | 0.93954481            | NC_000009.12:136882569-136882916 | 143          | 152        | -             | GGTGACTCAC                |
| MA1134.1         | FOS::JUNB   | 12.4605      | 0.92564687            | NC_000009.12:136882569-136882916 | 141          | 152        | -             | GGTGACTCACTC              |
| MA1137.1         | FOSL1::JUNB | 11.9075      | 0.92077136            | NC_000009.12:136882569-136882916 | 141          | 153        | -             | GGGTGACTCACTC             |
| MA1138.1         | FOSL2::JUNB | 11.3216      | 0.91763827            | NC_000009.12:136882569-136882916 | 142          | 151        | +             | AGTGAGTCAC                |
| MA1135.1         | FOSB::JUNB  | 11.0665      | 0.91373011            | NC_000009.12:136882569-136882916 | 142          | 151        | +             | AGTGAGTCAC                |
| MAO490.2         | JUNB        | 11.351       | 0.89888557            | NC_000009.12:136882569-136882916 | 141          | 153        | -             | GGGTGACTCACTC             |
| MA1137.1         | FOSL1::JUNB | 10.0784      | 0.87825235            | NC_000009.12:136882569-136882916 | 141          | 153        | +             | GAGTGAGTCACCC             |
| MA1132.1         | JUN::JUNB   | 8.34466      | 0.85506987            | NC_000009.12:136882569-136882916 | 142          | 151        | +             | AGTGAGTCAC                |
| MAO490.2         | JUNB        | 8.8275       | 0.85422354            | NC_000009.12:136882569-136882916 | 141          | 153        | +             | GAGTGAGTCACCC             |

CLU

| Matrix ID | Name        | Score   | Relative score | Sequence ID                     | Start | End | Strand | Predicted sequence |
|-----------|-------------|---------|----------------|---------------------------------|-------|-----|--------|--------------------|
| MA1135.1  | FOSB::JUNB  | 13.4597 | 0.957383433    | NC_000008.11:c27614985-27614632 | 198   | 207 | -      | CATGACTCAC         |
| MA1138.1  | FOSL2::JUNB | 13.3426 | 0.954396178    | NC_000008.11:c27614985-27614632 | 198   | 207 | -      | CATGACTCAC         |
| MAO490.1  | JUNB        | 12.5822 | 0.952578007    | NC_000008.11:c27614985-27614632 | 196   | 206 | +      | GCGTGAGTCAT        |
| MAO490.1  | JUNB        | 12.0251 | 0.945373935    | NC_000008.11:c27614985-27614632 | 198   | 208 | -      | GCATGACTCAC        |
| MA1135.1  | FOSB::JUNB  | 12.7823 | 0.945028249    | NC_000008.11:c27614985-27614632 | 197   | 206 | +      | CGTGAGTCAT         |
| MA1134.1  | FOS::JUNB   | 13.4756 | 0.943402574    | NC_000008.11:c27614985-27614632 | 197   | 208 | +      | CGTGAGTCATGC       |
| MA1138.1  | FOSL2::JUNB | 12.6712 | 0.942185195    | NC_000008.11:c27614985-27614632 | 197   | 206 | +      | CGTGAGTCAT         |
| MA1132.1  | JUN::JUNB   | 12.162  | 0.941246682    | NC_000008.11:c27614985-27614632 | 198   | 207 | -      | CATGACTCAC         |
| MA1134.1  | FOS::JUNB   | 12.4321 | 0.925149003    | NC_000008.11:c27614985-27614632 | 196   | 207 | -      | CATGACTCACGC       |
| MAO490.2  | JUNB        | 12.8159 | 0.924812897    | NC_000008.11:c27614985-27614632 | 196   | 208 | -      | GCATGACTCACGC      |
| MA1137.1  | FOSL1::JUNB | 11.5908 | 0.913409038    | NC_000008.11:c27614985-27614632 | 196   | 208 | -      | GCATGACTCACGC      |
| MAO490.2  | JUNB        | 10.7742 | 0.888677629    | NC_000008.11:c27614985-27614632 | 196   | 208 | +      | GCGTGAGTCATGC      |
| MA1137.1  | FOSL1::JUNB | 10.2734 | 0.882783798    | NC_000008.11:c27614985-27614632 | 196   | 208 | +      | GCGTGAGTCATGC      |
| MA1132.1  | JUN::JUNB   | 8.69961 | 0.863082983    | NC_000008.11:c27614985-27614632 | 197   | 206 | +      | CGTGAGTCAT         |
